# Supplementary material for: Viral integration drives multifocal HCC during the occult HBV infection
Source: J Exp Clin Cancer Res. 2019 Jun 14;38:261. doi: 10.1186/s13046-019-1273-1 (PMC6570863; doi:10.1186/s13046-019-1273-1)
Supplement: Supplementary file 1 — Figure S1. HBV breakpoint detection workflow from sequencing reads in FuseSV. Figure S2. HBV sub-genotype tree in host by VCS analysis. Figure S3. Constructing HBV genomes in tumors by VCS analysis. Figure S4. Comparison of genome-wide somatic SNVs among the six tumor specimens. Figure S5. Comparison of genome-wide copy number in six tumor specimens. Figure S6. EXT1 expression in hepatic or HCC cell lines by western blot. Figure S7. EXT1 affects HCC growth in vitro. Figure S8. EXT1 does not affect HCC cell migration in vitro. Table S1. Clinicopathologic features of the HBV patient with multiple HCC. Table S2. Sequencing data summary and HBV genome details of ten specimens. Table S3. VCS data summary and constructed HBV genome details of 264 single cells. Table S4. Alterations on HBV_B2 genome in ten specimens. Table S5. Homologous sequences at the junction sites of minor viral integration and HBV rearrangement cases. Table S6. Copy number alterations of six tumor specimens. Table S7. Somatic structure variations of six tumor specimens. (PDF 5584 kb) [file 13046_2019_1273_MOESM1_ESM.pdf]

## Supplementary Materials

### Viral integration drives multifocal HCC during the occult HBV infection

**Xiao-Ping Chen<sup>1#</sup>, Xin Long<sup>1,#</sup>, Wen-long Jia<sup>2,#</sup>, Han-Jie Wu<sup>3,#</sup>**, Jing Zhao<sup>4</sup>, Hui-Fang Liang<sup>1</sup>, Arian Laurence<sup>5</sup>, Jun Zhu<sup>6</sup>, Dong Dong<sup>7</sup>, Yan Chen<sup>1</sup>, Long Lin<sup>1</sup>, Yu-Dong Xia<sup>1</sup>, Wei-Yang Li<sup>1</sup>, Gui-Bo Li<sup>8</sup>, Zhi-Kun Zhao<sup>9</sup>, Kui Wu<sup>1</sup>, Yong Hou<sup>1</sup>, Jing-Jing Yu<sup>1</sup>, Wei Xiao<sup>1</sup>, Guo-Ping Wang<sup>10</sup>, Peng-Cheng Zhu<sup>10</sup>, Wei Chen<sup>1</sup>, Ming-Zhou Bai<sup>1</sup>, Yi-Xing Jian<sup>1</sup>, Karsten Kristiansen<sup>4</sup> & Qian Chen<sup>11\*</sup>

<sup>1</sup>The Hepatic Surgery Centre at Tongji Hospital, Tongji Medical College, HUST; Hubei Province for the Clinical Medicine Research Center of Hepatic Surgery; Key Laboratory of Organ Transplantation, Ministry of Education and Ministry of Public Health, Wuhan, 430030, China.

<sup>2</sup>Department of Computer Science, City University of Hong Kong, Hong Kong, P.R. China

<sup>3</sup>School of Biomedical Engineering, University of Technology Sydney, Sydney, NSW2007, Australia

<sup>4</sup>Laboratory of Genomics and Molecular Biomedicine, Department of Biology, University of Copenhagen, Universitetsparken 13, 2100 Copenhagen, Denmark

<sup>5</sup>The Newcastle upon Tyne Hospitals NHS Foundation Trust at Freeman Hospital, Newcastle, U.K

<sup>6</sup>Department of Genetics and Genomic Sciences, Icahn Institute of Genomics and Multiscale Biology, Icahn School of Medicine at Mount Sinai, 1425 Madison Avenue, New York, NY, U.S

<sup>7</sup>Laboratory of Molecular Ecology and Evolution, Institute of Estuarine and Coastal Research, East China Normal University, Shanghai, China

<sup>8</sup>School of Bioscience and Bioengineering at South China University of Technology, Guangzhou, China

<sup>9</sup>School of Biological Science and Medical Engineering at Southeast University, Nanjing, China

<sup>10</sup>The Department of Pathology at Tongji Hospital, Tongji Medical College, HUST, Wuhan, 430030, China

<sup>11</sup>The Division of Gastroenterology, Department of Internal Medicine at Tongji Hospital, Tongji Medical College, Huazhong University of Science and Technology (HUST), Wuhan, 430030, China

#These authors contributed equally

\*Corresponding author

\*Corresponding authors: Professor Qian Chen, Mailing address: The Division of Gastroenterology, Department of Internal Medicine at Tongji Hospital, HUST, Jie Fang Avenue 1095, Wuhan 430030, P.R. China; Tel: +86 27-83663500; Fax: +86 27-83663500; Email: chenqian201579@yahoo.com

## **Contents**

### Experimental Procedure Notes

- 1. The clinicopathologic features of the HBV patient with multiple HCC**
- 2. Evaluation of CSMD2 and EXT1 expression by IHC**
- 3. HBV variant assignment**
- 4. The HBV integration breakpoint detection procedure in FuseSV**
- 5. HBV-human conjunct sequence enrichment and sequencing**
- 6. Detection of somatic alterations in six tumors**
- 7. Construction of HBV-integrated local haplotype**
- 8. shRNA oligos**
- 9. Generation of stable EXT1 overexpression or knockdown cell lines**
- 10. Cell proliferation, migration, colony formation and soft agar clonogenic assays**

### Supplementary Tables and Figure Legends

Figure S1: **HBV breakpoint detection workflow from sequencing reads in FuseSV**

Figure S2: **HBV sub-genotype tree in host by VCS analysis**

Figure S3: **Constructing HBV genomes in tumors by VCS analysis**

Figure S4: **Comparison of genome-wide somatic SNVs among the six tumor specimens**

Figure S5: **Comparison of genome-wide copy number in six tumor specimens**

Figure S6: **EXT1 expression in hepatic or HCC cell lines by western blot**

Figure S7: **EXT1 affects HCC growth *in vitro***

Figure S8: **EXT1 does not affect HCC cell migration *in vitro***

Table S1: **Clinicopathologic features of the HBV patient with multiple HCC**

Table S2: **Sequencing data summary and HBV genome details of ten specimens**

Table S3: **VCS data summary and constructed HBV genome details of 264 single cells**

Table S4: **Alterations on HBV\_B2 genome in ten specimens**

Table S5: **Homologous sequences at the junction sites of minor viral integration and HBV rearrangement cases**

Table S6: **Copy number alterations of six tumor specimens**

Table S7: **Somatic structure variations of six tumor specimens**

## **1. The clinicopathologic features of the HBV patient with multiple HCC**

The study was approved by the Institutional Review Board of Tongji Hospital, Tongji Medical College of HUST, in Hubei province, China. The signed written informed consent was obtained before patients' recruitment, according to the regulations of the institutional ethics review boards. Initially, five patients were recruited for this study. Information about risk factors for HCC and other clinical pathologic characteristics was retrieved from patients' medical records. Thorough evaluation with physical examination, liver function tests, coagulation, and nutritional assessment for degree of baseline hepatic insufficiency were conducted to check that the patient was eligible for a liver resection. Imaging of the liver was undertaken for the detection and characterization of suspected multiple HCC, prior to planning a surgery. Only one case matched to our research design referring that the patient had occult HBV infected phase and the multiple HCC tissues were available during the surgery. The case was selected for studying the pattern of HBV integration in single cell level. Information about the duration of follow-up and status at the date of last information, were obtained from this patient's medical records.

One patient who matched to our research design was a 47-year-old Chinese male who underwent liver resection in May 2013, for what was originally diagnosed as HCC by an abdominal computer tomography (CT) scan. Medical history was obtained indicating he had no history of alcohol abuse, recognized acute hepatitis, mother-to-child transmission of HBV, blood transfusion, or injection drug use. Hepatitis serology tests

showed that the patient had an HBs Ab level of 884.5 mIU/mL, was HBs Ag-negative, HBc Ab-positive, HBe Ab-positive, HCV Ab-negative and had an undetectable blood HBV DNA copy number, all of which was consistent with occult HBV infection (Table S1). He has normal ALT (7 U/L) and mildly elevated AST (71 U/L). As part of the preoperative evaluation process, the serum Alpha-fetoprotein (AFP) concentration, a biomarker for HCC, was found to be elevated at 1210 ng/mL. Liver magnetic resonance imaging (MRI) revealed a 15cm x 10cm main lesion in the left hepatic lobe and multiple smaller lesions in the right hepatic lobe, all under 3 cm in diameter. MRI with contrast enhancement showed tumor thrombi involved in the right portal vein branch (PVT) and inferior vena cava (IVCT), indicating the intrahepatic and extrahepatic vascular spreading of HCC (Figure 1).

Multiple HCC were determined as consisting of a primary large tumor, multiple smaller satellite nodules surrounding the tumor, and invasive tumor thrombi (TT) in the hepatic portal vein (PV) and inferior vena cava (IVC), respectively. HCC specimens, including the multiple tumors in liver, their adjacent non-tumorous liver tissues, right portal vein tumor thrombosis (PVT), as well as inferior vena cava tumor thrombosis (IVCT) were obtained surgically from this patient, whose tissues were examined histologically and subsequently shipped to the Liver Surgery and Transplantation Department at Tongji Hospital in Wuhan, where pathologic analysis confirmed HCC status and indicated that adjacent tissues were primarily cirrhotic (Figure 1C&D). Immunohistochemistry for Arginase-1 (Arg-1) was performed using a polyclonal rabbit antihuman antibody (HPA003595, Sigma-Aldrich, St Louis, MO), and for Hepatocyte Paraffin-1 (HepPar-1)

was performed using a monoclonal mouse antihuman hepatocyte antibody (clone OCH1E5; DakoCytomation, Carpinteria, CA). A DAKO staining system was used to stain the tissues (DAKO, Carpinteria, CA) according to the manufacturer's protocol. Two pathologists (G-P.W and P-C.Z) independently evaluated the immunostained slides.

Tumors were diagnosed by light microscopy with criteria established from malignant tumors of the liver according to the World Health Organization classification system<sup>1</sup>. Tumors were classified into 4 grades (well, moderate, poor, and undifferentiated/anaplastic) based on a modified Edmondson and Steiner grading system<sup>1</sup>. The patient was staged according to the 2002 American Joint Commission on Cancer TNM staging system<sup>2</sup>.

A pathology report following hepatectomy revealed the presence of multiple, moderately to poorly differentiated hepatocellular carcinomas, trabecular and solid type, with involvement of the PV and HV (Figure 1D). There was evidence of regional lymph node involvement. The remainder of the liver parenchyma showed cirrhotic changes. The patient was subsequently staged as T4N1M0, Stage IV hepatocellular carcinoma. Follow-up CT scans after 7 months showed recurrence of the disease with the development of many new nodules scattered throughout the remaining liver together with peritoneal metastases. Despite further treatment with chemotherapy, the patient died 10 months after the surgery.

## **2. Evaluation of CSMD2 and EXT1 expression by IHC**

For validation study, 50 poorly-differentiated HCC tissues and their paired adjacent non-tumor tissues were acquired from patients who were performed liver resection during 2013 to 2014, at Hepatic surgery Center, Tongji Hospital, Tongji Medical college, HUST (Wuhan, China). Paraffin-embedded (FFPE) tissue sections were first placed in 65°C incubator for 30 minutes to deparaffinating, then transferred into xylene for 10 minutes, dipped into 100% absolute ethanol, 90% ethanol, 80% ethanol, 70% ethanol, and washed by distilled water and PBS for hydrating. Liver tissues immersed in citrate buffer were heated in microwave on high for 8 minutes and low for 10 minutes for heat-induced epitope retrieval. Liver tissues were washed by distilled water and PBS and then immersed into 3% H<sub>2</sub>O<sub>2</sub> in the dark room for blocking endogenous peroxidase. 5% BSA (Bovine Serum Albumin, Sigma-Aldrich, USA) was used to block non-specific epitope. 50 µl primary rabbit anti-CSMD2 antibody (1:200, Abcam, Cambridge, UK) and rabbit anti-EXT1 antibody (ab126305, 1:100) were added to each liver sample and the same amount of rabbit IgG isotype (A7016, Beyotime, Shanghai, China) was set as negative control for each slide with incubation at 4°C overnight. Each slide was incubated with 50 µl the second antibody complex (DAKO, Denmark) for 30 minutes at room temperature after three times washing and followed by DAB (DAKO, Denmark) dyeing. The slides were then stained by hematoxylin for 5 minutes, differentiated by hydrochloric acid alcohol for 5 seconds and dipped into diluted ammonia water for 8 seconds. All slides were rinsed in 70% ethanol, 80% ethanol, 90% ethanol, 100% absolute ethanol and xylene one by one. Neutral balsam was used to enclose the liver tissue before covered by cover glass for microscopic examination<sup>3</sup>.

The protocol for scoring slides has been described previously<sup>3,4</sup>. Briefly, the total score of each slide = score of staining intensity x score of number of positive staining cells. Staining intensity was grade as follows: 0, negative; 1, light yellow; 2, light brown; 3, brown. The number of positive cells was scored as 0 (0-10%), 1 (11%-25%), 2 (26%-50%), 3 (51%-75%), 4 (76%-100%). The scoring was performed independently by three pathologists without clinical knowledge of the patients.

### **3. HBV variant assignment**

HBV variant was identified from sequencing data. Reads were firstly aligned against human genome reference (hg19). Unmapped reads and soft-clipped reads were extracted from alignment results. Then we aligned these reads to HBV reference database downloaded from NCBI nucleotide database. The database of reference HBV variants includes: HBV\_A1 (AY738139.1), HBV\_A2 (HE576989.1), HBV\_A3 (AB194951.1), HBV\_A4 (AY934764.1), HBV\_A5 (FJ692613.1), HBV\_A6 (GQ331047.1), HBV\_A7 (FN545833.1), HBV\_B1 (AB642091.1), HBV\_B2 (FJ899779.1), HBV\_B3 (GQ924617.1), HBV\_B4 (GQ924626.1), HBV\_B5 (GQ924640.1), HBV\_B6 (JN792893.1), HBV\_B7 (GQ358137.1), HBV\_B8 (GQ358147.1), HBV\_B9 (GQ358149.1), HBV\_C1 (AB697490.1), HBV\_C10 (AB540583.1), HBV\_C11 (AB554019.1), HBV\_C12 (AB554025.1), HBV\_C13 (AB644280.1), HBV\_C14 (AB644284.1), HBV\_C15 (AB644286.1), HBV\_C16 (AB644287.1), HBV\_C2 (GQ358158.1), HBV\_C3 (DQ089801.1), HBV\_C4 (HM011493.1), HBV\_C5 (EU410080.1), HBV\_C6 (EU670263.1), HBV\_C7 (GU721029.1), HBV\_C8 (AP011106.1), HBV\_C9 (AP011108.1), HBV\_D1 (GU456636.1), HBV\_D2 (GQ477452.1),

HBV\_D3 (EU594434.1), HBV\_D4 (GQ922003.1), HBV\_D5 (GQ205377.1), HBV\_D6 (KF170740.1), HBV\_D7 (FJ904442.1), HBV\_D8 (FN594770.1), HBV\_D9 (JN664942.1), HBV\_E (FN594748.1), HBV\_F1a (AY090459.1), HBV\_F1b (FJ709464.2), HBV\_F2a (DQ899142.1), HBV\_F2b (DQ899146.1), HBV\_F3 (AB036920.1), HBV\_F4 (AF223965.1), HBV\_G (GU563556.1), HBV\_H (AB516393.1), HBV\_I1 (FJ023659.1), HBV\_I2 (FJ023664.1), HBV\_J (AB486012.1). The HBV variant with most uniquely aligned reads and at least 20% coverage was selected as first HBV variant. As the HBV variant of individual sample could have plenty of mutations differed from HBV variant references downloaded online. We introduced iterative process to construct individual HBV genomes. In this process, we applied the detected mutations (SNV and InDel) to modify corresponding HBV variant genome. Next, we remapped the candidate reads again to this modified new HBV variant reference, and tested whether new mutations could be found out. If there are new mutations, viral genome modification will be done again, and reads will also be remapped to the newest modified HBV variant genome, till there is no new mutation could be identified any more. All mutations used to modify the HBV genomes were gathered in the final mutation list (Table S4).

#### **4. The HBV integration breakpoint detection procedure in FuseSV**

A framework for the virus presence and viral integration in the host genome was constructed. The framework can deal with either the raw sequencing data or the alignment result in Sequence Alignment/Map (SAM) format. Paired-end reads related with the virus are extracted to determine the connecting partner candidate. And

unmapped reads are defined as candidate junction reads that may likely cover the breakpoint. Then the partial exhaustion algorithm is applied to construct the putative junction sequence library. Candidate junction reads are all aligned to the putative junction sequence library to support the initial integrations. Following filtrations are implemented on the initial virus integrations. The framework consists of six parts (Figure S1): basic information, reads process, obtain candidate, obtain integration, reads refinement, and result outputs.

From the NCBI-Nucleotide/Viruses database, we obtained the reference genome (“basic information” in Figure S1). All reads falling into the virus genomic region are extracted via reading indexed bam alignment result by some tools (“reads process” in Figure S1). From the read group, we could select the discordantly mapped reads and the soft-clipped reads. The discordantly mapping cases include aligning in same strand, locating at reversed positions or even on different chromosomes, and having the obviously abnormal insert size. Soft-clipped reads were searched for the location of virus breakpoint. The reads covering the virus junction position could only be aligned to one partner as long as discarding the part of read sequence that from the other partner. After trimming, the involved paired-end reads may become to a pair of discordantly mapped reads. We use partial exhaustion algorithm, to reconstruct the putative junction sequence with the paired soft-clipped reads as the span-reads (“obtain integration” in Figure S1). The partial exhaustion algorithm firstly calculates the region of breakpoint location from the span-reads information and the insert size of their corresponding library. Then, as the soft-clipped reads should be closed to the breakpoint, it splits the

span-reads' region by the soft-clipped reads: covered region by soft-clipped reads is called credible-region, and the other uncovered region is called potential-region. Finally, it concatenates each base from the two partners in pairwise way with the only limitation that two bases could not come from potential-region simultaneously. Putative junction sequence library is constructed as the reference for the next realignment of soft-clipped and unmapped reads. From the realignment results, we can know which putative integration cases are supported. The micro-homology and inner insertion at the virus breakpoints are relevant to the integration mechanisms. We applied another module specialize to ensure accuracy of the breakpoint detection. After obtaining integration sites supported by spanning reads and junction reads, the whole human-virus segment could be generated based on the breakpoint and the supporting reads. Then, realign all supporting reads to the segments could refine the breakpoint ("reads refinement" in Figure S1). For example, the homozygous continuous mismatch could be transfer to the inner insertion. As the virus breakpoint become accurate, the feature around it will be available and credible.

## **5. HBV-human conjunct sequence enrichment and sequencing**

The small insert-size DNA libraries were constructed following the instruction of Illumina. 45 qualified single-cell amplification products from each lesion (T1-T4, PVTT and HVTT) were selected to construct the sequencing libraries. The qualified single cell amplification DNA was sheared into about 180 bp fragments by Covaris E-210. These fragments were end blunted, "A" base tailed and adaptor ligated. 10 cycles PCR with an 8

bases barcode of primers were performed after the 160-200 bp size selection steps. The insert size and concentration of libraries were analyzed by Bioanalyzer 2100 (Agilent). Then the HBV genome capture process was conducted according to the MyGenostics GenCap™ target Enrichment Protocol. HBV probes fabricated from full length of HBV genome were hybridized with DNA libraries at 65°C for 24 hours and washed to remove the unhybridized fragments. The eluted libraries were amplified by 8 cycles PCR to produce enough DNA products for the next generation sequencing<sup>5</sup>. After the concentration and insert size were measured, libraries were processed for the pair-end 101 base pair sequencing on the Illumina HiSeq 2000 platform according to the manufacturer's instructions, with the average data amount of 1 Giga base pairs per library.

## **6. Detection of somatic alterations in six tumors**

The high quality WGS reads were aligned to the human reference genome (hg19) using BWA (v0.5.9) <sup>6</sup> with the default parameters. Picard (v1.54) was employed to mark duplicates. We used MuTect2<sup>7</sup> to detect somatic SNVs and short InDels. The minimum depth was set to 10X for tumor genomes, and the minimum number of mutation supporting reads in tumor was set to 3X. All high confident mutations were annotated with wANNOVAR<sup>8</sup>. Copy number alterations were detected by Patchwork<sup>9</sup>. Meerkat<sup>10</sup> was applied to identify structural variations. Minimum count of supporting reads pair and split read were both set to three.

## **7. Construction of HBV-integrated local haplotype**

Copy number alterations (CNAs) were detected by tool Patchwork<sup>9</sup> from WGS data. We found the genomic regions nearby the HBV integrations showed copy number changes (Figure S5). Moreover, the edges of the duplicated genomic regions were very close to the break-points of HBV integrations (Figure 2 and Figure 3). These CNAs relevant to the duplicated genomic regions inferred the genomic instability adjacent to HBV integrated sites, consistent with previous reports<sup>11, 12</sup>. Further analysis of the CNAs determined that the edges of these duplicated genomic regions were exactly the break-points of HBV integrations (Figure 2A and Figure 3A&B).

Considering cancer genomic region flanking the HBV 18 integration sites in HeLa cell line has been well characterized, and the local genomic map of HBV integrations in several other cancer cell lines were also reported in details. We resolved the linear structure of the genomic regions around HBV integrations in tumor cells of this samples, as reported in HPV analysis<sup>13, 14</sup>, called as “local haplotype”.

Firstly, the genomic region was divided into several segments (named by upper cases in Figure 2A and Figure 3A&B) based on the break-points of HBV integrations, and the individual HBV genome was also partitioned into several segments (named by lower cases in Figure 2B and Figure 3C) based on the viral break-points corresponding to the HBV integrations.

Secondly, from WGS data of tumor and control samples, the average depth of each segment was calculated using ‘depth’ command of SamTools [v1.3, <sup>15</sup>] with minimum base and mapping quality set as 5 and 10, respectively. To convert the average depth

from WGS data of tumor sample, we introduced purity and ploidy of tumor-cell in tumor sample calculated by tool ABSOLUTE [16; Table S2]. Call the purity of tumor-cell in tumor sample as **Purity<sub>T</sub>**, the average ploidy of pure tumor-cell in tumor sample as **Ploidy<sub>T</sub>**, and the average ploidy of pure normal cell as **Ploidy<sub>N</sub>** (assumed as 2). So the average ratio of the part from normal cells (**Ratio<sub>N</sub>**) in each genomic region was calculated as below:

$$\mathbf{Ratio}_N = 1 - \frac{\mathbf{Purity}_T * \mathbf{Ploidy}_T}{\mathbf{Purity}_T * \mathbf{Ploidy}_T + (1 - \mathbf{Purity}_T) * \mathbf{Ploidy}_N}$$

Then for each segment, we could also know its germline copy ratio from WGS data of control sample (**Copy\_ratio<sub>N</sub>**). So the depth of this segment from pure tumor-cell in tumor sample (**Detph<sub>T</sub>**) could be obtained from this segment's original average depth (**Detph<sub>O</sub>**) and whole genome average depth (**Detph<sub>W</sub>**) via formula below:

$$\mathbf{Detph}_T = \mathbf{Detph}_O - \mathbf{Detph}_W * \mathbf{Ratio}_N * \mathbf{Copy\_ratio}_N$$

Thirdly, from CNA results reported by Patchwork<sup>9</sup>, we could know the total and minor copy number of chromosome arms and CNA segments. The most bilateral regions in “local haplotype” or normalized depth of control samples were properly used to calculate the depth of single copy number. The copy times of HBV integrated or normal local haplotype were determined manually according to the copy number result from Patchwork. Then, the copy number of segments in “local haplotypes” could be determined (Figure 2A). Based on the segment connection relationship provided by viral integrations and SVs, we applied “Linear Programming” and “Weighted Oriented

Eulerian Path” algorithms (developed in-house software) to construct continuous segments path as single HBV integrated local haplotype with different copy times, which cost minimum changes on copy number of segments (Figure 2C).

## **8. shRNA oligos**

The EXT1 shRNA oligonucleotides were annealed and inserted into the AgeI / EcoRI site of the small hairpin RNA (shRNA) expression vector Tet-pLKO-puro (Addgene plasmid 21915).

Scramble shRNA was used as a negative control. shRNA oligo sequences from Sigma as follows:

Sequence 1:

CCGGCAATTGTGAGGACATTCTCATCTCGAGATGAGAATGTCCTCACAATTGTTTTTG;

Sequence 2:

CCGGCCCAACTTTGATGTTTCTATTCTCGAGAATAGAAACATCAAAGTTGGGTTTTTG;

Sequence 3:

CCGGCCTTCGTTCCCTTGGGATCAATCTCGAGATTGATCCCAAGGAACGAAGTTTTTG

## **9. Generation of stable EXT1 overexpression or knockdown cell lines**

Human EXT1 CDNA was produced from EXT1 pENTER vector (CH895686, ViGene Biosciences, Rockville, MD, USA) using primers:

GCGGATCCATTATTATTCGCCACCATGCAGGCCAAAAACGCTATTT,  
GGAATTCTCACTTATCGTCGTCATCCTTGTAATCAAGTCGCTCAATGTCTCGGTATT.

For overexpression, full-length human EXT1 with flag or empty vector was cloned into pBABE-puro vector (Addgene plasmid 1764) digested by BamHI and EcoRI. Retroviral supernatants were produced by transfection of 293FT cells, a kindly gift from Dr. Zhanguo Zhang (Hepatic Surgery Center, Tongji Hospital, Huazhong University of Science and Technology), using X-tremeGene HP DNA Transfectant (06366236001, Roche, Basle, Switzerland).

For shRNA known-down, Scrambled or EXT1-targeting shRNAs were cloned as annealed oligonucleotides (Sigma) into Tet-pLKO-puro (Addgene plasmid 21915) digested with AgeI and EcoRI according to provided protocol from Addgene. Ten clones of each sequence were selected for sequencing. PLKO-Tet-On EXT1 shRNA constructs were confirmed and named as shEXT1 1-5, shEXT1 2-1 and shEXT1 3-1. Sequence-verified clones were used to produce lentiviral particles according to the protocols. Lentiviral supernatants were produced by transfection of 293FT cells using X-tremeGene HP DNA Transfectant.

The collected supernatants were filtered through a 0.45  $\mu$  m filter (PALL, Port Washington, NY, USA), and subsequently concentrated by Centricon Plus 70 (Merck Millipore, Darmstadt, Germany) according to the manufacturer's instructions. Concentrated retrovirus or lentivirus supernatants were added on the HCC cell lines with a multiplicity of infection (MOI) ranging from 30 to 50 in the presence of polybrene

(8  $\mu$ g/ml) for 48 hours (retrovirus) or 72 hours (lentivirus). For both overexpression and knockdown cells, stable pools were selected in growth medium containing 5  $\mu$ g/mL puromycin (Sigma-Aldrich) for 2 weeks, and stable lines were maintained in selection media. The optimal doxycycline dose for inducible knockdown was determined to be 100ng/ml, which was the dose that resulted in maximal knockdown of EXT1 after 48h.

The effect of EXT1 overexpression or knockdown was assessed by western blot using antibody to EXT1 (abcam, ab126305) or GAPDH (Santa Cruz Biotechnology, sc-25778), and horseradish peroxidase (HRP)-conjugated secondary antibodies, followed by signal detection with chemiluminescence (GE Healthcare Life Sciences).

#### **10. Cell proliferation, migration, colony formation and soft agar clonogenic assays**

Cell proliferation was measured using the Cell Counting Kit-8 (CCK-8) (Beyotime Institute of Biotechnology, China) according to the manufacturer's instructions. HCC cell lines were incubated with CCK-8 for 2 hour at indicated time points. Cell proliferation rate was assessed by measuring the absorbance at 450 nm with the Universal Microplate Reader (Bio-Tek Elx 800, USA).

For migration assays, cells at a density of  $5 \times 10^4$  in 250 $\mu$ l of DMEM medium containing 0.2% FBS were seeded into the upper chamber of the 24-well 8- $\mu$ M pore transwell plate (Corning, NY, USA). 500 $\mu$ l of medium containing 10% FBS were added to the lower chambers. After 24 hours, cells on the top side of each insert were scraped off and the wells were fixed in 4% phosphate-buffered neutral formalin (PH7.4), stained by crystal

violet and the transwell membrane was visualized under Nikon Digital ECLIPSE C1 system (Nikon Corporation). Photographs of 5 random fields across three replicate wells were captured for quantification analysis. Migrated cells were counted by the Image-Pro Plus v6.0 software (Media Cybernetics Inc.).

For colony formation assay, cells were plated in 6-well plates at a density of  $0.5 \sim 2 \times 10^3$  cells per well. After 14 days, the colonies were stained with crystal violet for 30 minutes and rinsed with deionized distilled water, then photographed using a Nikon D80 digital camera (10 Mega-pixel; Nikon Corp., Tokyo, Japan) and scored using AlphaEase FC software (Alpha Innotech Inc., San Leandro, CA, USA).

For soft agar colony formation assay, cells were plated in 6-well plates at a density of  $2 \times 10^3 \sim 2 \times 10^4$  cells per well. Cells suspended in 1.0 mL of top agar (0.4% agar in culture medium) were overlaid onto a layer of 1.0 mL of bottom agar (0.8% agar in the same culture medium). After 14 days, the colonies were photographed and scored by inverted phase-contrast microscopy without fixation and staining.

#### **Reference:**

1. Xu X, Hou Y, Yin X, Bao L, Tang A, Song L, Li F, Tsang S, Wu K, Wu H, He W, Zeng L, *et al.* Single-cell exome sequencing reveals single-nucleotide mutation characteristics of a kidney tumor. *Cell* 2012;**148**:886-95.
2. El-Serag HB. Hepatocellular carcinoma. *N Engl J Med* 2011;**365**:1118-27.
3. Ding ZY, Jin GN, Wang W, Chen WX, Wu YH, Ai X, Chen L, Zhang WG, Liang HF, Laurence A, Zhang MZ, Datta PK, *et al.* Reduced expression of transcriptional intermediary factor 1 gamma promotes metastasis and indicates poor prognosis of hepatocellular carcinoma. *Hepatology* 2014;**60**:1620-36.

4. Tao ZH, Wan JL, Zeng LY, Xie L, Sun HC, Qin LX, Wang L, Zhou J, Ren ZG, Li YX, Fan J, Wu WZ. miR-612 suppresses the invasive-metastatic cascade in hepatocellular carcinoma. *J Exp Med* 2013;**210**:789-803.
5. Li W, Zeng X, Lee NP, Liu X, Chen S, Guo B, Yi S, Zhuang X, Chen F, Wang G, Poon RT, Fan ST, *et al.* HIVID: an efficient method to detect HBV integration using low coverage sequencing. *Genomics* 2013;**102**:338-44.
6. Li H, Durbin R. Fast and accurate short read alignment with Burrows-Wheeler transform. *Bioinformatics* 2009;**25**:1754-60.
7. Cibulskis K, Lawrence MS, Carter SL, Sivachenko A, Jaffe D, Sougnez C, Gabriel S, Meyerson M, Lander ES, Getz G. Sensitive detection of somatic point mutations in impure and heterogeneous cancer samples. *Nat Biotechnol* 2013;**31**:213-9.
8. Wang K, Li M, Hakonarson H. ANNOVAR: functional annotation of genetic variants from high-throughput sequencing data. *Nucleic Acids Res* 2010;**38**:e164.
9. Mayrhofer M, DiLorenzo S, Isaksson A. Patchwork: allele-specific copy number analysis of whole-genome sequenced tumor tissue. *Genome Biol* 2013;**14**:R24,2013-14-3-r24.
10. Yang L, Luquette LJ, Gehlenborg N, Xi R, Haseley PS, Hsieh CH, Zhang C, Ren X, Protopopov A, Chin L, Kucherlapati R, Lee C, *et al.* Diverse mechanisms of somatic structural variations in human cancer genomes. *Cell* 2013;**153**:919-29.
11. Neuveut C, Wei Y, Buendia MA. Mechanisms of HBV-related hepatocarcinogenesis. *J Hepatol* 2010;**52**:594-604.
12. Sung WK, Zheng H, Li S, Chen R, Liu X, Li Y, Lee NP, Lee WH, Ariyaratne PN, Tennakoon C, Mulawadi FH, Wong KF, *et al.* Genome-wide survey of recurrent HBV integration in hepatocellular carcinoma. *Nat Genet* 2012;**44**:765-9.
13. Adey A, Burton JN, Kitzman JO, Hiatt JB, Lewis AP, Martin BK, Qiu R, Lee C, Shendure J. The haplotype-resolved genome and epigenome of the aneuploid HeLa cancer cell line. *Nature* 2013;**500**:207-11.
14. Akagi K, Li J, Broutian TR, Padilla-Nash H, Xiao W, Jiang B, Rocco JW, Teknos TN, Kumar B, Wangsa D, He D, Ried T, *et al.* Genome-wide analysis of HPV integration in human cancers reveals recurrent, focal genomic instability. *Genome Res* 2014;**24**:185-99.
15. Li H, Handsaker B, Wysoker A, Fennell T, Ruan J, Homer N, Marth G, Abecasis G, Durbin R, 1000 Genome Project Data Processing Subgroup. The Sequence Alignment/Map format and SAMtools. *Bioinformatics* 2009;**25**:2078-9.

16. Carter SL, Cibulskis K, Helman E, McKenna A, Shen H, Zack T, Laird PW, Onofrio RC, Winckler W, Weir BA, Beroukhir R, Pellman D, *et al.* Absolute quantification of somatic DNA alterations in human cancer. *Nat Biotechnol* 2012;**30**:413-21.

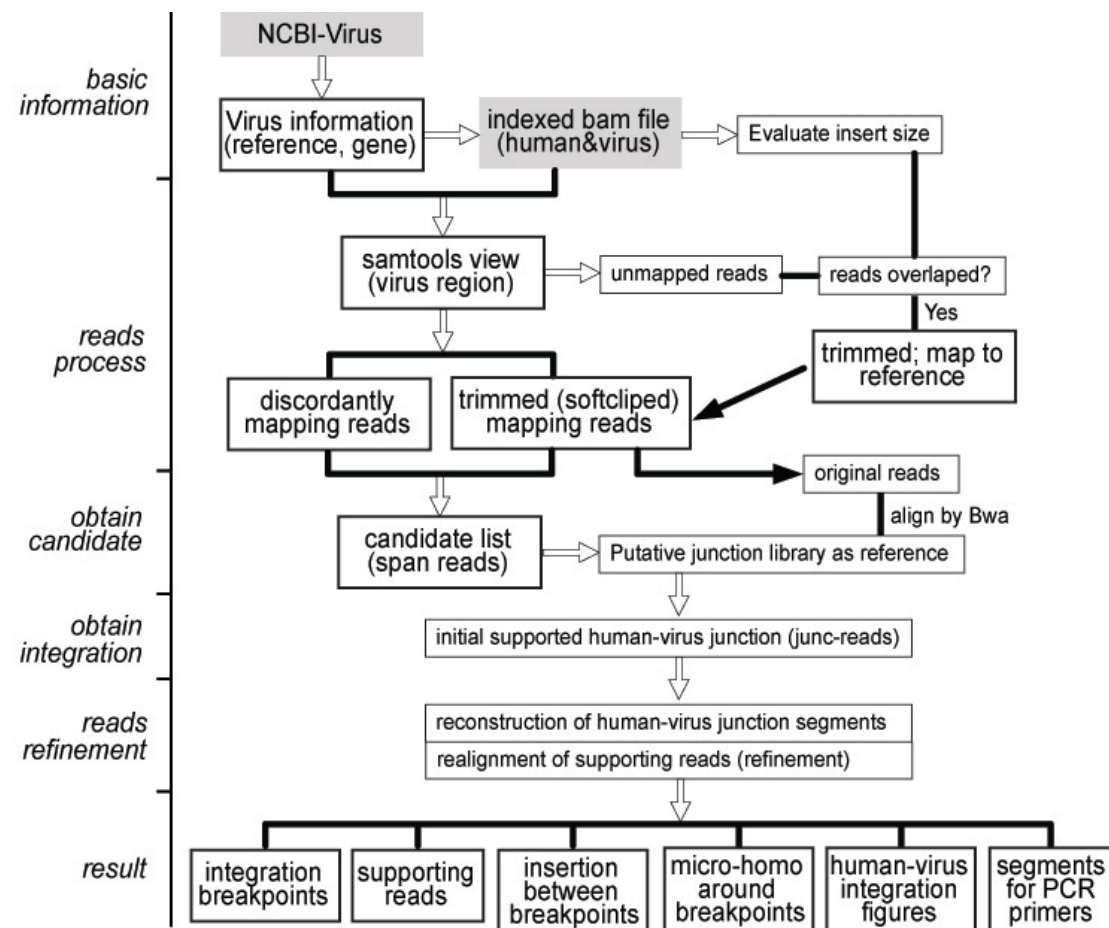

**Figure S1. HBV breakpoint detection workflow from sequencing reads in FuseSV.** The six parts of VCS data analysis pipeline in FuseSV: basic information set by users; reads are processed and classified from alignment file; obtain the candidate list based on the span-reads; obtain integration via the putative junction library and junc-reads; supporting reads are refined and filtered; generate the result.

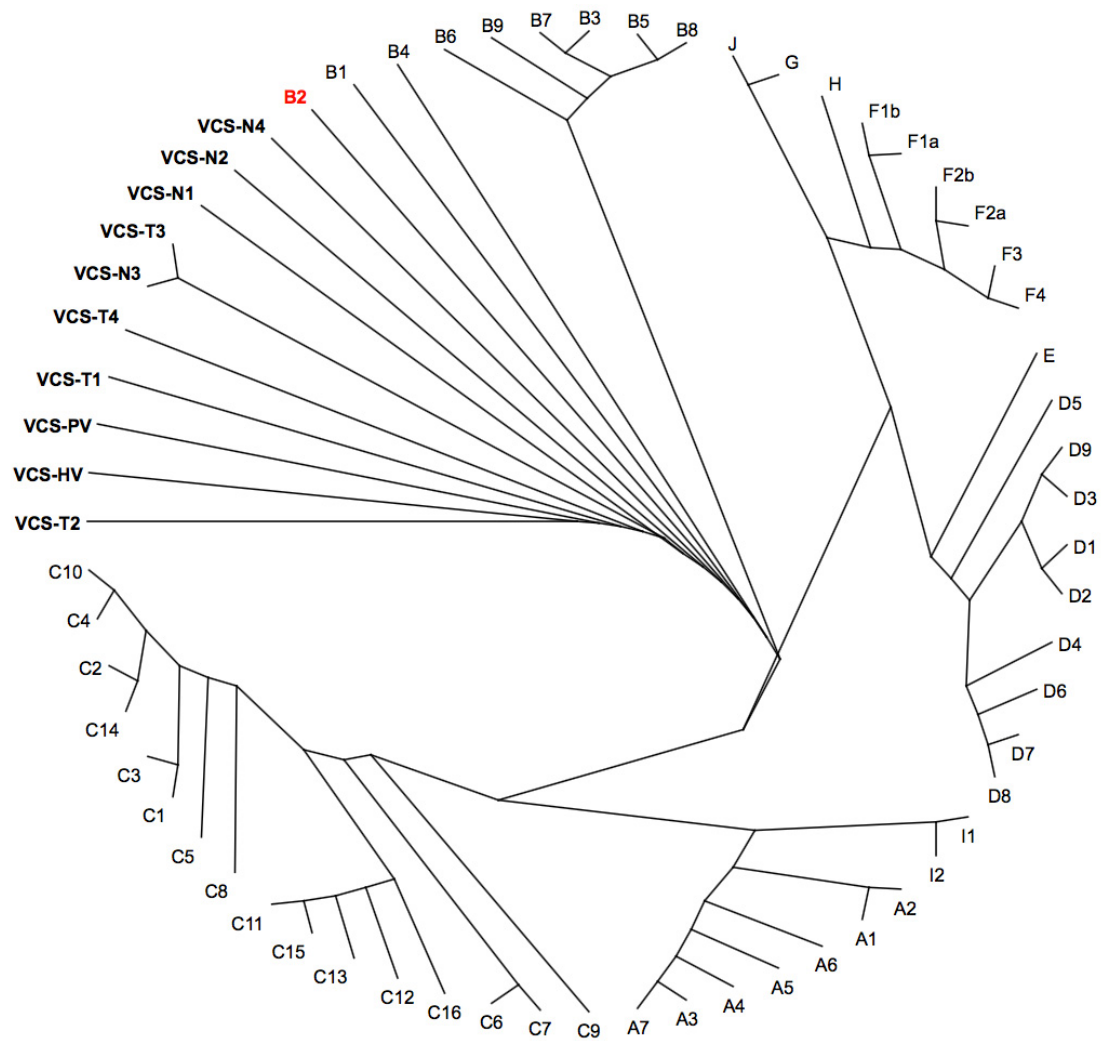

**Figure S2. HBV sub-genotype tree in host by VCS analysis.** HBV subtypes identified from VCS data of ten tissue samples were classified with B2 subtype.

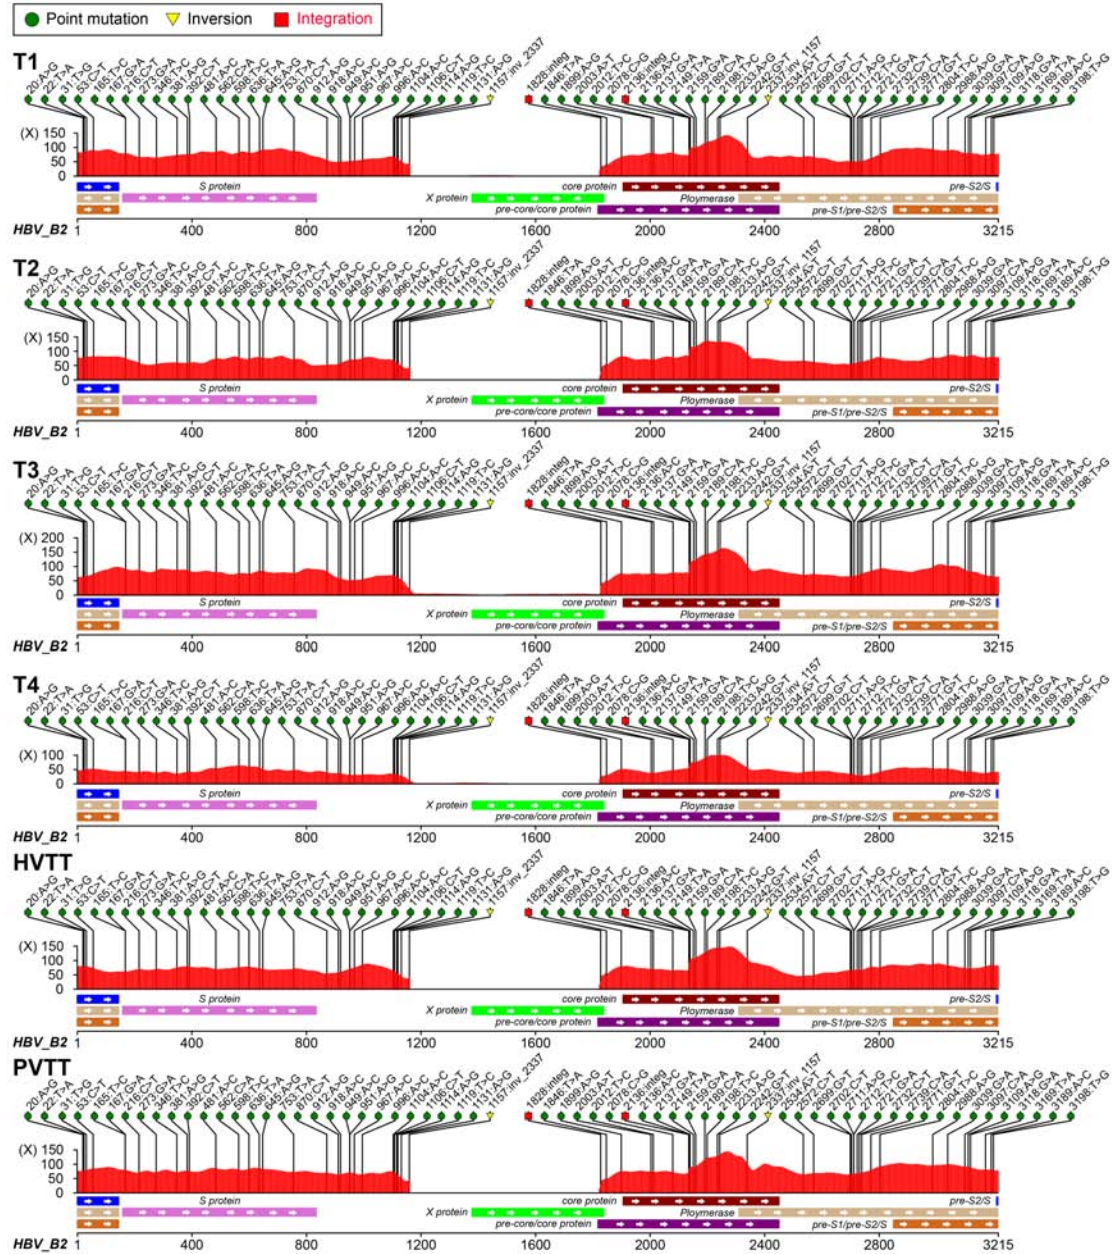

**Figure S3. Constructing HBV genomes in tumors by VCS analysis.** Depth distribution along HBV genomes were displayed with mutations used to construct individual HBV genomes based on VCS data. The integration breakpoints were also plotted

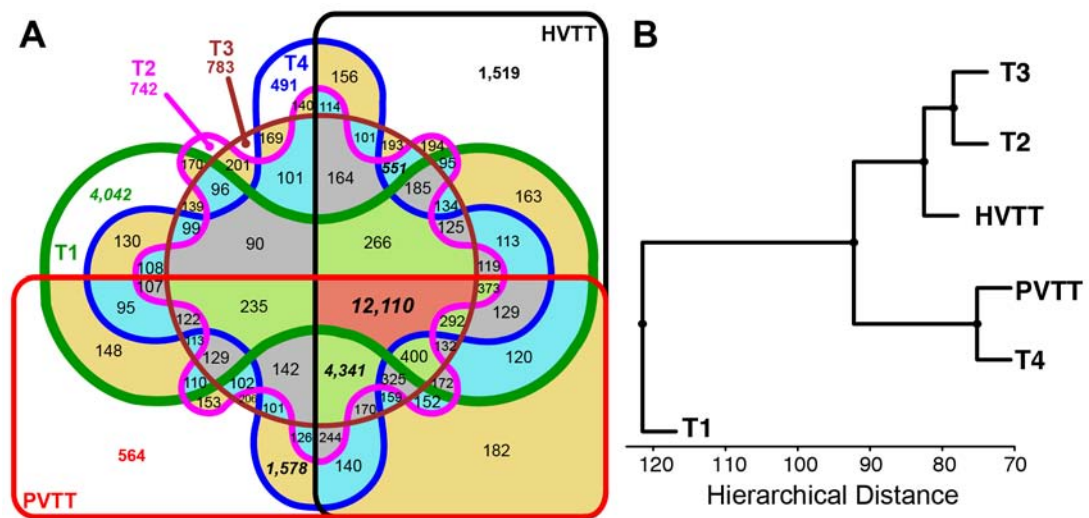

**Figure S4. Comparison of genome-wide somatic SNVs among the six tumor specimens.** (A) Venn diagram comparing the somatic SNVs among the six tumors. (B) Hierarchical clustering based on somatic SNVs.

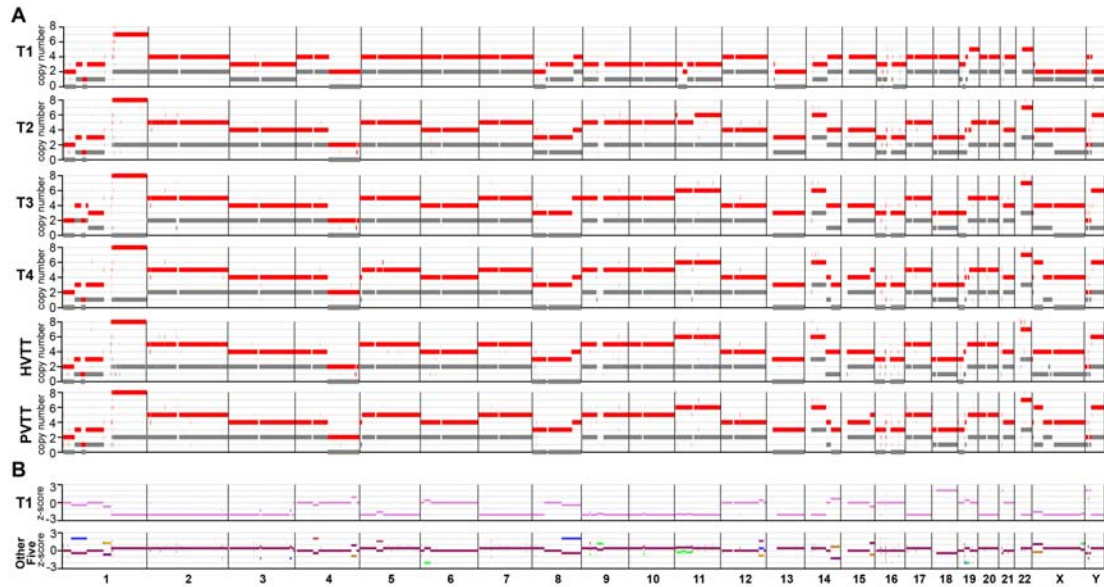

**Figure S5. Comparison of genome-wide copy number in six tumor specimens.** (A) Copy numbers along the cancer genome of each tumor were drawn. Red line, copy number; grey line, minor copy number. (B) Distribution of copy number z-score along the genome of T1 and the other five tumors.

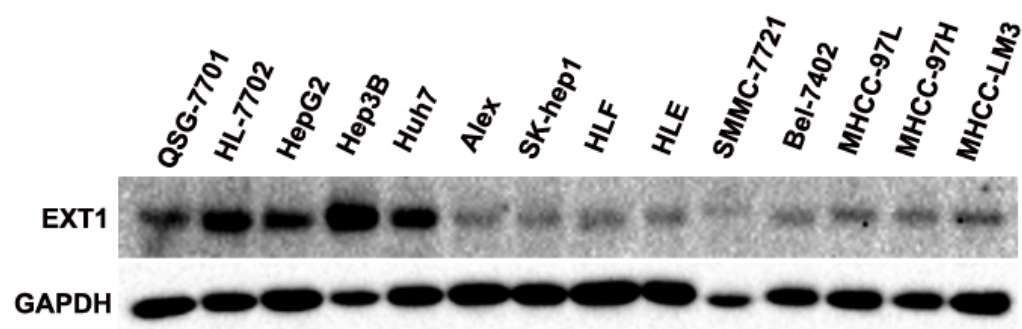

**Figure S6. EXT1 expression in hepatic or HCC cell lines by western blot.** Among the tested cell lines, QSG-7701, HL-7702, HepG2, and Huh7 showed strong EXT1 protein expression. In contrast, there were lower EXT1 expression in Alex, Sk-hep1, HLF, HLE, SMMC-7721, Bel-7402, MHCC-97L, MHCC-97H, and MHCC-LM3, respectively.

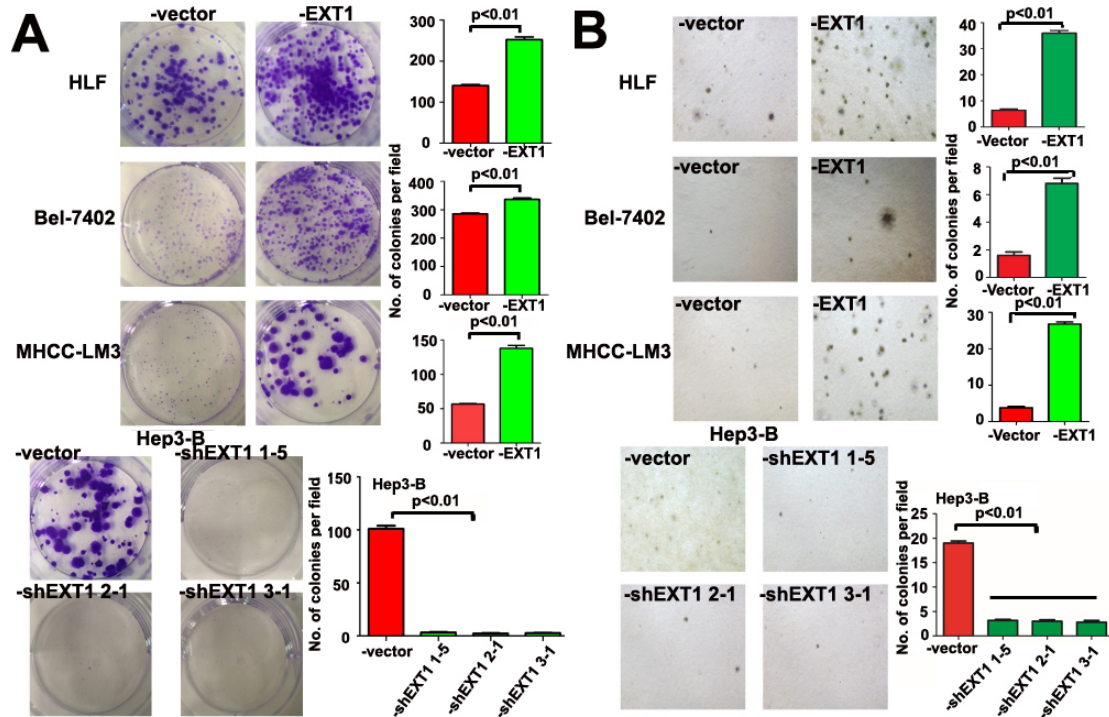

**Figure S7. EXT1 affects HCC growth *in vitro*.** To evaluate the effects of EXT1 overexpression or knockdown on HCC cell proliferation, colony formation (A) and soft agar clonogenic assays (B) were carried out. HCC cell lines, including HLF, Bel-7402, and MHCC-LM3 were stably overexpressed with EXT1 or control vector. Hep3-B cells were stably knocked down with EXT1. Anchorage-dependent and -independent clonogenic growth was greatly increased, resulting in increased colony size and number in the EXT1 overexpressing cell. In contrast, the clonogenic growth was remarkably reduced in the EXT1 knockdown cells.

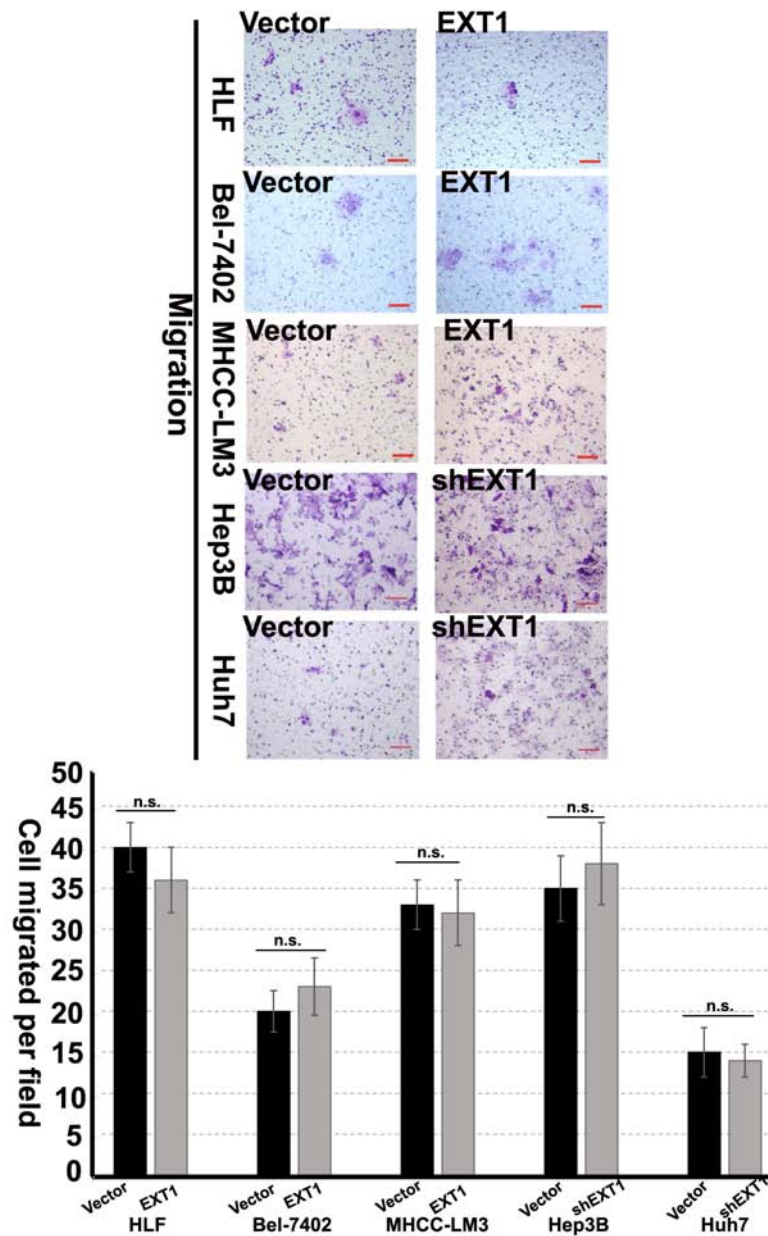

**Figure S8. EXT1 does not affect HCC migration *in vitro*.** To evaluate the effects of EXT1 overexpression or knockdown on HCC cell migration, HCC cell lines, including HLF, Bel-7402, and MHCC-LM3 were stably overexpressed with EXT1 or control vector. Hep3-B and Huh7 cells were stably knocked down with EXT1. The altered EXT1 expression in these HCC cell lines does not affect cell migration in comparison with their control in transwell assays (n=3). Scale bar, 100  $\mu$ m. n.s. not significant.

**Table S1: Clinicopathologic features of the HBV patient with multiple HCC**

|                                           |                    |
|-------------------------------------------|--------------------|
| <b>Age, y/Sex</b>                         | <b>47/M</b>        |
| <b>Etiology</b>                           |                    |
| Alcohol Abuse/Drug Abuse                  | -                  |
| Mother-to-child Transmission of Hepatitis | -                  |
| Blood Transfusion                         | -                  |
| <b>Virus Infection</b>                    |                    |
| HBsAg expression                          | -                  |
| HBsAb expression                          | +                  |
| HBcAb expression                          | +                  |
| HBeAb expression                          | +                  |
| HBV-DNA                                   | Undetectable       |
| HCV-Ab expression                         | -                  |
| <b>Tumor marker, AFP (ng/mL)</b>          | <b>1210</b>        |
| <b>Pathological Features</b>              |                    |
| No. of Tumors                             | 4                  |
| Size of Largest Tumor, cm                 | 15cm x 10cm        |
| Histologic Type of Tumors                 | Trabecular, Solid  |
| Histology of Non-tumor Tissue             | Cirrhosis          |
| Tumor Grade                               | Moderately, Poorly |
| Intrahepatic Vessels Invasion             | +, PVTT            |
| Extrahepatic Vessels Invasion             | +, IVCTT           |
| TNM Stage                                 | Stage IV           |

HCC, hepatocellular carcinoma; HBsAg, hepatitis B virus surface antigen; HBsAb, hepatitis B virus surface antibody; HBcAb, hepatitis B core antibody; HBeAb, hepatitis B e antibody; HCV Ab, hepatitis C virus antibody; AFP, alpha-fetoprotein; PVTT, portal vein tumor thrombosis; IVCTT, inferior vena cava tumor thrombosis. Hepatitis serology testing showed that the patient was HBsAb positive, HBsAg negative, HBcAb positive, HBeAb positive, HCV Ab negative and had no detectable blood HBV DNA copy number, all of which is consistent with the definition of an occult HBV infection.

**Table S2.** Sequencing data summary and HBV genome details in ten specimens.  
1. "Purity" and "Ploidy" was calculated by ABSOLUTE, with N1 sample as the global control.  
2. "JR" means "junction reads" supporting relative inversion or integration.  
3. "v\_inv" refers the inversion on HBV\_B2 genome.  
4. "-" in table cell means "not detected".

| VCS data summary |                 |             |                  |             |             |            | WGS data summary |               |                     |             |                  |                       |        |        |              |              |  |  |
|------------------|-----------------|-------------|------------------|-------------|-------------|------------|------------------|---------------|---------------------|-------------|------------------|-----------------------|--------|--------|--------------|--------------|--|--|
| Sample ID        | Read Length(bp) | Clean Reads | Clean Bases (bp) | Q20 percent | Q30 percent | GC percent | Read Length(bp)  | Reads Aligned | Uniquely Align rate | Clean Reads | Average depth(X) | Whole Genome Coverage |        |        | Tumor Purity | Tumor Ploidy |  |  |
|                  |                 |             |                  |             |             |            |                  |               |                     |             |                  | ≥4x                   | ≥10x   | ≥20x   |              |              |  |  |
| N1               | 150:150         | 45222948    | 4522294800       | 96.66%      | 90.45%      | 41.24%     | 150:150          | 803796250     | 95.88%              | 838364050   | 35.25            | 99.44%                | 98.60% | 93.61% | -            | -            |  |  |
| N2               | 150:150         | 45087074    | 4508707400       | 96.30%      | 89.58%      | 44.12%     | 150:150          | 825593185     | 95.85%              | 861327538   | 36.02            | 99.46%                | 98.63% | 93.83% | -            | -            |  |  |
| N3               | 150:150         | 45716730    | 4571673000       | 96.46%      | 90.01%      | 42.65%     | 150:150          | 883277002     | 95.87%              | 921285592   | 38.39            | 99.49%                | 98.72% | 94.47% | -            | -            |  |  |
| N4               | 150:150         | 40619358    | 4061935800       | 96.48%      | 89.96%      | 43.24%     | 150:150          | 828518430     | 95.69%              | 865837242   | 35.95            | 99.45%                | 98.63% | 93.84% | -            | -            |  |  |
| T1               | 150:150         | 17346806    | 1734680600       | 96.52%      | 90.09%      | 42.58%     | 150:150          | 1288500681    | 95.91%              | 1343497276  | 55.66            | 99.63%                | 99.14% | 95.77% | 0.39         | 9.02         |  |  |
| T2               | 150:150         | 23141900    | 2314190000       | 96.45%      | 89.91%      | 42.27%     | 150:150          | 1471435134    | 95.73%              | 1537124646  | 63.85            | 99.64%                | 99.20% | 98.27% | 0.36         | 8.08         |  |  |
| T3               | 150:150         | 50742664    | 5074266400       | 96.56%      | 90.19%      | 42.81%     | 150:150          | 1511571662    | 95.87%              | 1576702560  | 65.66            | 99.65%                | 99.26% | 98.48% | 0.28         | 4.36         |  |  |
| T4               | 150:150         | 45576888    | 4557688800       | 96.40%      | 89.73%      | 42.70%     | 150:150          | 1369166476    | 95.87%              | 1428156368  | 59.77            | 99.63%                | 99.17% | 98.22% | 0.33         | 5.46         |  |  |
| HVTT             | 150:150         | 53391244    | 5339124400       | 96.70%      | 90.45%      | 42.30%     | 150:150          | 1595783256    | 95.71%              | 1667299146  | 68.42            | 99.65%                | 99.25% | 98.09% | 1.00         | 9.58         |  |  |
| PVTT             | 150:150         | 35840538    | 3584053800       | 96.56%      | 90.19%      | 42.99%     | 150:150          | 1565991825    | 95.72%              | 1636093152  | 67.35            | 99.64%                | 99.22% | 98.08% | 0.83         | 9.87         |  |  |

| Major Integ NO | upstream (5') |        |           | downstream (3') |        |       | inner insertion | PCR primers           |                      | validation (Y/N) |    |    |    |    |    |    |    |      |      |
|----------------|---------------|--------|-----------|-----------------|--------|-------|-----------------|-----------------------|----------------------|------------------|----|----|----|----|----|----|----|------|------|
|                | segment       | strand | bkpos     | segment         | strand | bkpos |                 | left                  | right                | N1               | N2 | N3 | N4 | T1 | T2 | T3 | T4 | HVTT | PVTT |
| 1              | chr1          | -      | 34397064  | HBV_B2          | +      | 1828  | NONE            | CAAAAGGCTGGGAGAGAATAA | GGAAAGAAGTCAGAAGGCAG | N                | N  | N  | N  | Y  | Y  | Y  | Y  | Y    | Y    |
| 2              | chr8          | -      | 118557326 | HBV_B2          | +      | 2136  | NONE            | AGGCAATATGCGAGTITTC   | CAGGAAATGTGAACACACAA | N                | N  | Y  | N  | Y  | Y  | Y  | Y  | Y    | Y    |
| 3              | HBV_B2        | +      | 1157      | HBV_B2          | -      | 2337  | NONE            | TTGGTGTCTTTGGAGGTGTG  | ACAGGCTTTTACTTCTCGC  | N                | N  | Y  | N  | Y  | Y  | Y  | Y  | Y    | Y    |

| Details of constructed virus genomes from VCS data |            |                  |           |     |     |     |          |        |        |        |        |        |       |      |      |      |                  |        |                   |  |  |
|----------------------------------------------------|------------|------------------|-----------|-----|-----|-----|----------|--------|--------|--------|--------|--------|-------|------|------|------|------------------|--------|-------------------|--|--|
| Sample ID                                          | Virus Type | Average Depth(X) | Mutations |     |     |     | Coverage |        |        |        |        |        |       |      |      |      | major integ (JR) |        | minor integ (Y/N) |  |  |
|                                                    |            |                  | SUM       | SNP | INS | DEL | ≥=1X     | ≥=4X   | ≥=10X  | ≥=30X  | ≥=50X  | ≥=100X | v_inv | chr1 | chr8 | chr1 | chr8             | others |                   |  |  |
| N1                                                 | HBV_B2     | 9.04             | 49        | 49  | 0   | 0   | 87.87%   | 78.76% | 32.60% | 0.84%  | 0.00%  | 0.00%  | 9     | 2    | 5    | N    | N                | N      |                   |  |  |
| N2                                                 | HBV_B2     | 11.01            | 55        | 55  | 0   | 0   | 94.93%   | 80.00% | 57.73% | 1.03%  | 0.00%  | 0.00%  | 13    | 4    | 2    | N    | N                | N      |                   |  |  |
| N3                                                 | HBV_B2     | 33.33            | 61        | 61  | 0   | 0   | 99.47%   | 89.83% | 79.76% | 68.53% | 9.77%  | 0.99%  | 24    | 24   | 21   | N    | N                | N      |                   |  |  |
| N4                                                 | HBV_B2     | 9.42             | 48        | 48  | 0   | 0   | 97.48%   | 76.33% | 42.83% | 2.06%  | 0.00%  | 0.00%  | 8     | 4    | 7    | N    | N                | N      |                   |  |  |
| T1                                                 | HBV_B2     | 78.20            | 61        | 61  | 0   | 0   | 83.27%   | 79.32% | 79.32% | 79.32% | 76.20% | 8.64%  | 51    | 35   | 39   | N    | N                | N      |                   |  |  |
| T2                                                 | HBV_B2     | 81.07            | 61        | 61  | 0   | 0   | 79.35%   | 79.32% | 79.32% | 79.32% | 78.29% | 7.93%  | 50    | 52   | 47   | N    | N                | N      |                   |  |  |
| T3                                                 | HBV_B2     | 86.86            | 61        | 61  | 0   | 0   | 97.08%   | 81.71% | 79.31% | 79.31% | 78.42% | 10.42% | 58    | 51   | 50   | N    | N                | N      |                   |  |  |
| T4                                                 | HBV_B2     | 47.32            | 61        | 61  | 0   | 0   | 89.83%   | 79.32% | 79.32% | 77.26% | 27.37% | 4.51%  | 35    | 31   | 28   | N    | N                | N      |                   |  |  |
| HVTT                                               | HBV_B2     | 87.53            | 61        | 61  | 0   | 0   | 79.32%   | 79.32% | 79.32% | 79.32% | 76.27% | 7.62%  | 46    | 49   | 35   | N    | N                | N      |                   |  |  |
| PVTT                                               | HBV_B2     | 93.98            | 61        | 61  | 0   | 0   | 79.38%   | 79.31% | 79.31% | 79.31% | 79.10% | 11.07% | 53    | 51   | 42   | N    | N                | N      |                   |  |  |

| Details of constructed virus genomes from WGS data |            |                  |           |     |     |     |          |       |        |        |       |        |       |      |      |      |                  |        |                   |  |  |
|----------------------------------------------------|------------|------------------|-----------|-----|-----|-----|----------|-------|--------|--------|-------|--------|-------|------|------|------|------------------|--------|-------------------|--|--|
| Sample ID                                          | Virus Type | Average Depth(X) | Mutations |     |     |     | Coverage |       |        |        |       |        |       |      |      |      | major integ (JR) |        | minor integ (Y/N) |  |  |
|                                                    |            |                  | SUM       | SNP | INS | DEL | ≥=1X     | ≥=4X  | ≥=10X  | ≥=30X  | ≥=50X | ≥=100X | v_inv | chr1 | chr8 | chr1 | chr8             | others |                   |  |  |
| N1                                                 | -          | -                | -         | -   | -   | -   | -        | -     | -      | -      | -     | -      | -     | -    | -    | -    | -                | -      |                   |  |  |
| N2                                                 | -          | -                | -         | -   | -   | -   | -        | -     | -      | -      | -     | -      | -     | -    | -    | -    | -                | -      |                   |  |  |
| N3                                                 | HBV_B2     | 3.27             | 7         | 7   | 0   | 0   | 87.47%   | 1.12% | 0.15%  | 0.00%  | 0.00% | 0.00%  | N     | N    | N    | N    | N                | N      |                   |  |  |
| N4                                                 | -          | -                | -         | -   | -   | -   | -        | -     | -      | -      | -     | -      | -     | -    | -    | -    | -                | -      |                   |  |  |
| T1                                                 | HBV_B2     | 9.48             | 53        | 53  | 0   | 0   | 79.32%   | 3.01% | 5.17%  | 0.00%  | 0.00% | 0.00%  | 6     | 8    | 4    | N    | N                | N      |                   |  |  |
| T2                                                 | HBV_B2     | 11.93            | 61        | 61  | 0   | 0   | 79.32%   | 3.11% | 9.79%  | 0.00%  | 0.00% | 0.00%  | 5     | 9    | 4    | N    | N                | N      |                   |  |  |
| T3                                                 | HBV_B2     | 14.72            | 61        | 61  | 0   | 0   | 87.71%   | 2.81% | 14.53% | 19.97% | 0.00% | 0.00%  | 6     | 15   | 6    | N    | N                | N      |                   |  |  |
| T4                                                 | HBV_B2     | 8.40             | 43        | 43  | 0   | 0   | 79.75%   | 2.97% | 2.88%  | 0.00%  | 0.00% | 0.00%  | 11    | 5    | 3    | N    | N                | N      |                   |  |  |
| HVTT                                               | HBV_B2     | 12.22            | 61        | 61  | 0   | 0   | 79.32%   | 3.10% | 11.43% | 0.00%  | 0.00% | 0.00%  | 9     | 6    | 8    | N    | N                | N      |                   |  |  |
| PVTT                                               | HBV_B2     | 16.10            | 61        | 61  | 0   | 0   | 79.32%   | 3.11% | 18.92% | 0.00%  | 0.00% | 0.00%  | 13    | 8    | 4    | N    | N                | N      |                   |  |  |

**Table S3.** Alterations on HBV\_B2 genome in ten specimens.

1. "Fwd" means forward aligned reads that support one alteration.
2. "Rvs" means reversed-complemented aligned reads that support one alteration.
3. "-" means not detected in WGS data.

| Sample ID | HBV Type | HBV Position | Ref Allele | Alt Type | Alt Allele | details in VCS data |     |     |     |     |              |       |         |                                   |   | details in WGS data      |   |   |   |   |              |   |     |     |     |              |     |     |       |         |                          |   |   |  |  |
|-----------|----------|--------------|------------|----------|------------|---------------------|-----|-----|-----|-----|--------------|-------|---------|-----------------------------------|---|--------------------------|---|---|---|---|--------------|---|-----|-----|-----|--------------|-----|-----|-------|---------|--------------------------|---|---|--|--|
|           |          |              |            |          |            | Ref_Supports        |     |     |     |     | Alt_Supports |       |         |                                   |   | Alt-Shared Samples (VCS) |   |   |   |   | Ref_Supports |   |     |     |     | Alt_Supports |     |     |       |         | Alt-Shared Samples (WGS) |   |   |  |  |
|           |          |              |            |          |            | Sum                 | Fow | Rev | Sum | Fwd | Rev          | Count | Details |                                   |   |                          |   |   |   |   |              |   | Sum | Fow | Rev | Sum          | Fwd | Rev | Count | Details |                          |   |   |  |  |
| N1        | HBV_B2   | 20           | A          | SNV      | G          | 0                   | 0   | 0   | 8   | 6   | 2            | 10    | 10      | HVTT,N1,N2,N3,N4,PVTT,T1,T2,T3,T4 | - | -                        | - | - | - | - | -            | - | -   | -   | -   | -            | -   | -   | -     | -       | -                        | - | - |  |  |
| N1        | HBV_B2   | 22           | T          | SNV      | A          | 0                   | 0   | 0   | 9   | 6   | 3            | 10    | 10      | HVTT,N1,N2,N3,N4,PVTT,T1,T2,T3,T4 | - | -                        | - | - | - | - | -            | - | -   | -   | -   | -            | -   | -   | -     | -       | -                        | - | - |  |  |
| N1        | HBV_B2   | 31           | T          | SNV      | G          | 0                   | 0   | 0   | 8   | 5   | 3            | 10    | 10      | HVTT,N1,N2,N3,N4,PVTT,T1,T2,T3,T4 | - | -                        | - | - | - | - | -            | - | -   | -   | -   | -            | -   | -   | -     | -       | -                        | - | - |  |  |
| N1        | HBV_B2   | 53           | C          | SNV      | T          | 0                   | 0   | 0   | 8   | 3   | 5            | 9     | 9       | HVTT,N1,N2,N3,PVTT,T1,T2,T3,T4    | - | -                        | - | - | - | - | -            | - | -   | -   | -   | -            | -   | -   | -     | -       | -                        | - | - |  |  |
| N1        | HBV_B2   | 165          | T          | SNV      | C          | 0                   | 0   | 0   | 5   | 4   | 1            | 10    | 10      | HVTT,N1,N2,N3,N4,PVTT,T1,T2,T3,T4 | - | -                        | - | - | - | - | -            | - | -   | -   | -   | -            | -   | -   | -     | -       | -                        | - | - |  |  |
| N1        | HBV_B2   | 167          | G          | SNV      | A          | 0                   | 0   | 0   | 4   | 3   | 1            | 10    | 10      | HVTT,N1,N2,N3,N4,PVTT,T1,T2,T3,T4 | - | -                        | - | - | - | - | -            | - | -   | -   | -   | -            | -   | -   | -     | -       | -                        | - | - |  |  |
| N1        | HBV_B2   | 216          | C          | SNV      | T          | 0                   | 0   | 0   | 4   | 2   | 2            | 10    | 10      | HVTT,N1,N2,N3,N4,PVTT,T1,T2,T3,T4 | - | -                        | - | - | - | - | -            | - | -   | -   | -   | -            | -   | -   | -     | -       | -                        | - | - |  |  |
| N1        | HBV_B2   | 273          | G          | SNV      | A          | 0                   | 0   | 0   | 6   | 4   | 2            | 10    | 10      | HVTT,N1,N2,N3,N4,PVTT,T1,T2,T3,T4 | - | -                        | - | - | - | - | -            | - | -   | -   | -   | -            | -   | -   | -     | -       | -                        | - | - |  |  |
| N1        | HBV_B2   | 562          | C          | SNV      | A          | 0                   | 0   | 0   | 10  | 5   | 5            | 10    | 10      | HVTT,N1,N2,N3,N4,PVTT,T1,T2,T3,T4 | - | -                        | - | - | - | - | -            | - | -   | -   | -   | -            | -   | -   | -     | -       | -                        | - | - |  |  |
| N1        | HBV_B2   | 598          | T          | SNV      | C          | 0                   | 0   | 0   | 8   | 4   | 4            | 10    | 10      | HVTT,N1,N2,N3,N4,PVTT,T1,T2,T3,T4 | - | -                        | - | - | - | - | -            | - | -   | -   | -   | -            | -   | -   | -     | -       | -                        | - | - |  |  |
| N1        | HBV_B2   | 636          | T          | SNV      | A          | 0                   | 0   | 0   | 7   | 3   | 4            | 10    | 10      | HVTT,N1,N2,N3,N4,PVTT,T1,T2,T3,T4 | - | -                        | - | - | - | - | -            | - | -   | -   | -   | -            | -   | -   | -     | -       | -                        | - | - |  |  |
| N1        | HBV_B2   | 645          | A          | SNV      | G          | 0                   | 0   | 0   | 5   | 3   | 2            | 10    | 10      | HVTT,N1,N2,N3,N4,PVTT,T1,T2,T3,T4 | - | -                        | - | - | - | - | -            | - | -   | -   | -   | -            | -   | -   | -     | -       | -                        | - | - |  |  |
| N1        | HBV_B2   | 912          | A          | SNV      | G          | 0                   | 0   | 0   | 5   | 3   | 2            | 9     | 9       | HVTT,N1,N2,N3,PVTT,T1,T2,T3,T4    | - | -                        | - | - | - | - | -            | - | -   | -   | -   | -            | -   | -   | -     | -       | -                        | - | - |  |  |
| N1        | HBV_B2   | 918          | A          | SNV      | C          | 0                   | 0   | 0   | 5   | 3   | 2            | 10    | 10      | HVTT,N1,N2,N3,N4,PVTT,T1,T2,T3,T4 | - | -                        | - | - | - | - | -            | - | -   | -   | -   | -            | -   | -   | -     | -       | -                        | - | - |  |  |
| N1        | HBV_B2   | 949          | A          | SNV      | C          | 0                   | 0   | 0   | 5   | 3   | 2            | 10    | 10      | HVTT,N1,N2,N3,N4,PVTT,T1,T2,T3,T4 | - | -                        | - | - | - | - | -            | - | -   | -   | -   | -            | -   | -   | -     | -       | -                        | - | - |  |  |
| N1        | HBV_B2   | 951          | A          | SNV      | G          | 0                   | 0   | 0   | 5   | 3   | 2            | 10    | 10      | HVTT,N1,N2,N3,N4,PVTT,T1,T2,T3,T4 | - | -                        | - | - | - | - | -            | - | -   | -   | -   | -            | -   | -   | -     | -       | -                        | - | - |  |  |
| N1        | HBV_B2   | 1104         | A          | SNV      | C          | 0                   | 0   | 0   | 6   | 5   | 1            | 9     | 9       | HVTT,N1,N2,N3,PVTT,T1,T2,T3,T4    | - | -                        | - | - | - | - | -            | - | -   | -   | -   | -            | -   | -   | -     | -       | -                        | - | - |  |  |
| N1        | HBV_B2   | 1106         | C          | SNV      | T          | 0                   | 0   | 0   | 8   | 7   | 1            | 9     | 9       | HVTT,N1,N2,N3,PVTT,T1,T2,T3,T4    | - | -                        | - | - | - | - | -            | - | -   | -   | -   | -            | -   | -   | -     | -       | -                        | - | - |  |  |
| N1        | HBV_B2   | 1114         | A          | SNV      | G          | 0                   | 0   | 0   | 9   | 8   | 1            | 9     | 9       | HVTT,N1,N2,N3,PVTT,T1,T2,T3,T4    | - | -                        | - | - | - | - | -            | - | -   | -   | -   | -            | -   | -   | -     | -       | -                        | - | - |  |  |
| N1        | HBV_B2   | 1119         | T          | SNV      | C          | 0                   | 0   | 0   | 9   | 8   | 1            | 9     | 9       | HVTT,N1,N2,N3,PVTT,T1,T2,T3,T4    | - | -                        | - | - | - | - | -            | - | -   | -   | -   | -            | -   | -   | -     | -       | -                        | - | - |  |  |
| N1        | HBV_B2   | 1131         | A          | SNV      | G          | 0                   | 0   | 0   | 9   | 8   | 1            | 10    | 10      | HVTT,N1,N2,N3,N4,PVTT,T1,T2,T3,T4 | - | -                        | - | - | - | - | -            | - | -   | -   | -   | -            | -   | -   | -     | -       | -                        | - | - |  |  |
| N1        | HBV_B2   | 1899         | A          | SNV      | G          | 0                   | 0   | 0   | 7   | 5   | 2            | 10    | 10      | HVTT,N1,N2,N3,N4,PVTT,T1,T2,T3,T4 | - | -                        | - | - | - | - | -            | - | -   | -   | -   | -            | -   | -   | -     | -       | -                        | - | - |  |  |
| N1        | HBV_B2   | 2003         | A          | SNV      | T          | 0                   | 0   | 0   | 6   | 3   | 3            | 10    | 10      | HVTT,N1,N2,N3,N4,PVTT,T1,T2,T3,T4 | - | -                        | - | - | - | - | -            | - | -   | -   | -   | -            | -   | -   | -     | -       | -                        | - | - |  |  |
| N1        | HBV_B2   | 2012         | T          | SNV      | C          | 0                   | 0   | 0   | 7   | 5   | 2            | 10    | 10      | HVTT,N1,N2,N3,N4,PVTT,T1,T2,T3,T4 | - | -                        | - | - | - | - | -            | - | -   | -   | -   | -            | -   | -   | -     | -       | -                        | - | - |  |  |
| N1        | HBV_B2   | 2078         | C          | SNV      | G          | 0                   | 0   | 0   | 7   | 5   | 2            | 10    | 10      | HVTT,N1,N2,N3,N4,PVTT,T1,T2,T3,T4 | - | -                        | - | - | - | - | -            | - | -   | -   | -   | -            | -   | -   | -     | -       | -                        | - | - |  |  |
| N1        | HBV_B2   | 2136         | A          | SNV      | C          | 0                   | 0   | 0   | 17  | 13  | 4            | 10    | 10      | HVTT,N1,N2,N3,N4,PVTT,T1,T2,T3,T4 | - | -                        | - | - | - | - | -            | - | -   | -   | -   | -            | -   | -   | -     | -       | -                        | - | - |  |  |
| N1        | HBV_B2   | 2137         | G          | SNV      | A          | 0                   | 0   | 0   | 18  | 13  | 5            | 10    | 10      | HVTT,N1,N2,N3,N4,PVTT,T1,T2,T3,T4 | - | -                        | - | - | - | - | -            | - | -   | -   | -   | -            | -   | -   | -     | -       | -                        | - | - |  |  |
| N1        | HBV_B2   | 2149         | T          | SNV      | A          | 0                   | 0   | 0   | 19  | 14  | 5            | 10    | 10      | HVTT,N1,N2,N3,N4,PVTT,T1,T2,T3,T4 | - | -                        | - | - | - | - | -            | - | -   | -   | -   | -            | -   | -   | -     | -       | -                        | - | - |  |  |
| N1        | HBV_B2   | 2159         | G          | SNV      | A          | 0                   | 0   | 0   | 19  | 15  | 4            | 10    | 10      | HVTT,N1,N2,N3,N4,PVTT,T1,T2,T3,T4 | - | -                        | - | - | - | - | -            | - | -   | -   | -   | -            | -   | -   | -     | -       | -                        | - | - |  |  |
| N1        | HBV_B2   | 2189         | C          | SNV      | A          | 0                   | 0   | 0   | 21  | 13  | 8            | 10    | 10      | HVTT,N1,N2,N3,N4,PVTT,T1,T2,T3,T4 | - | -                        | - | - | - | - | -            | - | -   | -   | -   | -            | -   | -   | -     | -       | -                        | - | - |  |  |
| N1        | HBV_B2   | 2198         | T          | SNV      | C          | 0                   | 0   | 0   | 20  | 12  | 8            | 10    | 10      | HVTT,N1,N2,N3,N4,PVTT,T1,T2,T3,T4 | - | -                        | - | - | - | - | -            | - | -   | -   | -   | -            | -   | -   | -     | -       | -                        | - | - |  |  |
| N1        | HBV_B2   | 2233         | A          | SNV      | G          | 0                   | 0   | 0   | 25  | 14  | 11           | 10    | 10      | HVTT,N1,N2,N3,N4,PVTT,T1,T2,T3,T4 | - | -                        | - | - | - | - | -            | - | -   | -   | -   | -            | -   | -   | -     | -       | -                        | - | - |  |  |
| N1        | HBV_B2   | 2242         | G          | SNV      | T          | 0                   | 0   | 0   | 24  | 12  | 12           | 10    | 10      | HVTT,N1,N2,N3,N4,PVTT,T1,T2,T3,T4 | - | -                        | - | - | - | - | -            | - | -   | -   | -   | -            | -   | -   | -     | -       | -                        | - | - |  |  |
| N1        | HBV_B2   | 2534         | A          | SNV      | T          | 0                   | 0   | 0   | 7   | 3   | 4            | 10    | 10      | HVTT,N1,N2,N3,N4,PVTT,T1,T2,T3,T4 | - | -                        | - | - | - | - | -            | - | -   | -   | -   | -            | -   | -   | -     | -       | -                        | - | - |  |  |
| N1        | HBV_B2   | 2572         | C          | SNV      | T          | 0                   | 0   | 0   | 8   | 5   | 3            | 8     | 8       | HVTT,N1,N3,PVTT,T1,T2,T3,T4       | - | -                        | - | - | - | - | -            | - | -   | -   | -   | -            | -   | -   | -     | -       | -                        | - | - |  |  |
| N1        | HBV_B2   | 2699         | G          | SNV      | T          | 0                   | 0   | 0   | 9   | 5   | 4            | 9     | 9       | HVTT,N1,N2,N3,PVTT,T1,T2,T3,T4    | - | -                        | - | - | - | - | -            | - | -   | -   | -   | -            | -   | -   | -     | -       | -                        | - | - |  |  |
| N1        | HBV_B2   | 2702         | C          | SNV      | T          | 0                   | 0   | 0   | 8   | 5   | 3            | 9     | 9       | HVTT,N1,N2,N3,PVTT,T1,T2,T3,T4    | - | -                        | - | - | - | - | -            | - | -   | -   | -   | -            | -   | -   | -     | -       | -                        | - | - |  |  |
| N1        | HBV_B2   | 2711         | A          | SNV      | G          | 0                   | 0   | 0   | 9   | 7   | 2            | 9     | 9       | HVTT,N1,N2,N3,PVTT,T1,T2,T3,T4    | - | -                        | - | - | - | - | -            | - | -   | -   | -   | -            | -   | -   | -     | -       | -                        | - | - |  |  |
| N1        | HBV_B2   | 2712         | T          | SNV      | C          | 0                   | 0   | 0   | 9   | 7   | 2            | 9     | 9       | HVTT,N1,N2,N3,PVTT,T1,T2,T3,T4    | - | -                        | - | - | - | - | -            | - | -   | -   | -   | -            | -   | -   | -     | -       | -                        | - | - |  |  |
| N1        | HBV_B2   | 2721         | G          | SNV      | A          | 0                   | 0   | 0   | 10  | 7   | 3            | 10    | 10      | HVTT,N1,N2,N3,N4,PVTT,T1,T2,T3,T4 | - | -                        | - | - | - | - | -            | - | -   | -   | -   | -            | -   | -   | -     | -       | -                        | - | - |  |  |
| N1        | HBV_B2   | 2732         | C          | SNV      | T          | 0                   | 0   | 0   | 9   | 7   | 2            | 9     | 9       | HVTT,N1,N3,N4,PVTT,T1,T2,T3,T4    | - | -                        | - | - | - | - | -            | - | -   | -   | -   | -            | -   | -   | -     | -       | -                        | - | - |  |  |
| N1        | HBV_B2   | 2739         | C          | SNV      | A          | 0                   | 0   | 0   | 10  | 8   | 2            | 9     | 9       | HVTT,N1,N3,N4,PVTT,T1,T2,T3,T4    | - | -                        | - | - | - | - | -            | - | -   | -   | -   | -            | -   | -   | -     | -       | -                        | - | - |  |  |
| N1        | HBV_B2   | 2771         | G          | SNV      | T          | 0                   | 0   | 0   | 8   | 6   | 2            | 10    | 10      | HVTT,N1,N2,N3,N4,PVTT,T1,T2,T3,T4 | - | -                        | - | - | - | - | -            | - | -   | -   | -   | -            | -   | -   | -     | -       | -                        | - | - |  |  |
| N1        | HBV_B2   | 2804         | T          | SNV      | C          | 0                   | 0   | 0   | 12  | 7   | 5            | 10    | 10      | HVTT,N1,N2,N3,N4,PVTT,T1,T2,T3,T4 | - | -                        | - | - | - | - | -            | - | -   | -   | -   | -            | -   | -   | -     | -       | -                        | - | - |  |  |
| N1        | HBV_B2   | 2988         | A          | SNV      | G          | 0                   | 0   | 0   | 10  | 6   | 4            | 10    | 10      | HVTT,N1,N2,N3,N4,PVTT,T1,T2,T3,T4 | - | -                        | - | - | - | - | -            | - | -   | -   | -   | -            | -   | -   | -     | -       | -                        | - | - |  |  |
| N1        | HBV_B2   | 3039         | G          | SNV      | A          | 0                   | 0   | 0   | 10  | 3   | 7            | 10    | 10      | HVTT,N1,N2,N3,N4,PVTT,T1,T2,T3,T4 | - | -                        | - | - | - | - | -            | - | -   | -   | -   | -            | -   | -   | -     | -       | -                        | - | - |  |  |
| N1        | HBV_B2   | 3118         | G          | SNV      | A          | 0                   | 0   | 0   | 6   | 4   | 2            | 10    | 10      | HVTT,N1,N2,N3,N4,PVTT,T1,T2,T3,T4 | - | -                        | - | - | - | - | -            | - | -   | -   | -   | -            | -   | -   | -     | -       | -                        | - | - |  |  |
| N1        | HBV_B2   | 3169         | T          | SNV      | A          | 0                   | 0   | 0   | 9   | 6   | 3            | 10    | 10      | HVTT,N1,N2,N3,N4,PVTT,T1,T2,T3,T4 | - | -                        | - | - | - | - | -            | - | -   | -   | -   | -            | -   | -   | -     | -       | -                        | - | - |  |  |
| N1        | HBV_B2   | 3198         | T          | SNV      | G          | 0                   | 0   | 0   | 7   | 5   | 2            | 10    | 10      | HVTT,N1,N2,N3,N4,PVTT,T1,T2,T3,T4 | - | -                        | - | - | - | - | -            | - | -   | -   | -   | -            | -   | -   | -     | -       | -                        | - | - |  |  |
| N2        | HBV_B2   | 20           | A          | SNV      | G          | 0                   | 0   | 0   | 13  | 7   | 6            | 10    | 10      | HVTT,N1,N2,N3,N4,PVTT,T1,T2,T3,T4 | - | -                        | - | - | - | - | -            | - | -   | -   | -   | -            | -   | -   | -     | -       | -                        | - | - |  |  |
| N2        | HBV_B2   | 22           | T          | SNV      | A          | 0                   | 0   | 0   | 14  | 8   | 6            | 10    | 10      | HVTT,N1,N2,N3,N4,PVTT,T1,T2,T3,T4 | - | -                        | - | - | - | - | -            | - | -   | -   | -   | -            | -   | -   | -     | -       | -                        | - | - |  |  |
| N2        | HBV_B2   | 31           | T          | SNV      | G          | 6                   | 4   | 2   | 7   | 4   | 3            | 10    | 10      | HVTT,N1,N2,N3,N4,PVTT,T1,T2,T3,T4 | - | -                        | - | - | - | - | -            | - | -   | -   | -   | -            | -   | -   | -     | -       | -                        | - | - |  |  |
| N2        | HBV_B2   | 53           | C          | SNV      |            |                     |     |     |     |     |              |       |         |                                   |   |                          |   |   |   |   |              |   |     |     |     |              |     |     |       |         |                          |   |   |  |  |

31

|    |     |    |      |   |     |   |   |   |   |    |    |    |    |                                   |   |   |   |   |   |   |   |   |
|----|-----|----|------|---|-----|---|---|---|---|----|----|----|----|-----------------------------------|---|---|---|---|---|---|---|---|
| N4 | HBV | B2 | 1899 | A | SNV | G | 0 | 0 | 0 | 8  | 4  | 4  | 10 | HVTT,N1,N2,N3,N4,PVTT,T1,T2,T3,T4 | - | - | - | - | - | - | - | - |
| N4 | HBV | B2 | 2003 | A | SNV | T | 0 | 0 | 0 | 9  | 5  | 4  | 10 | HVTT,N1,N2,N3,N4,PVTT,T1,T2,T3,T4 | - | - | - | - | - | - | - | - |
| N4 | HBV | B2 | 2012 | T | SNV | C | 0 | 0 | 0 | 6  | 3  | 3  | 10 | HVTT,N1,N2,N3,N4,PVTT,T1,T2,T3,T4 | - | - | - | - | - | - | - | - |
| N4 | HBV | B2 | 2078 | C | SNV | G | 0 | 0 | 0 | 8  | 6  | 2  | 10 | HVTT,N1,N2,N3,N4,PVTT,T1,T2,T3,T4 | - | - | - | - | - | - | - | - |
| N4 | HBV | B2 | 2136 | A | SNV | C | 0 | 0 | 0 | 17 | 9  | 8  | 10 | HVTT,N1,N2,N3,N4,PVTT,T1,T2,T3,T4 | - | - | - | - | - | - | - | - |
| N4 | HBV | B2 | 2137 | G | SNV | A | 0 | 0 | 0 | 17 | 9  | 8  | 10 | HVTT,N1,N2,N3,N4,PVTT,T1,T2,T3,T4 | - | - | - | - | - | - | - | - |
| N4 | HBV | B2 | 2149 | T | SNV | A | 0 | 0 | 0 | 18 | 8  | 10 | 10 | HVTT,N1,N2,N3,N4,PVTT,T1,T2,T3,T4 | - | - | - | - | - | - | - | - |
| N4 | HBV | B2 | 2159 | G | SNV | A | 0 | 0 | 0 | 17 | 7  | 10 | 10 | HVTT,N1,N2,N3,N4,PVTT,T1,T2,T3,T4 | - | - | - | - | - | - | - | - |
| N4 | HBV | B2 | 2189 | C | SNV | A | 0 | 0 | 0 | 15 | 10 | 5  | 10 | HVTT,N1,N2,N3,N4,PVTT,T1,T2,T3,T4 | - | - | - | - | - | - | - | - |
| N4 | HBV | B2 | 2198 | T | SNV | C | 0 | 0 | 0 | 14 | 9  | 5  | 10 | HVTT,N1,N2,N3,N4,PVTT,T1,T2,T3,T4 | - | - | - | - | - | - | - | - |
| N4 | HBV | B2 | 2233 | A | SNV | G | 0 | 0 | 0 | 16 | 9  | 7  | 10 | HVTT,N1,N2,N3,N4,PVTT,T1,T2,T3,T4 | - | - | - | - | - | - | - | - |
| N4 | HBV | B2 | 2242 | G | SNV | T | 0 | 0 | 0 | 15 | 8  | 7  | 10 | HVTT,N1,N2,N3,N4,PVTT,T1,T2,T3,T4 | - | - | - | - | - | - | - | - |
| N4 | HBV | B2 | 2534 | A | SNV | T | 0 | 0 | 0 | 7  | 4  | 3  | 10 | HVTT,N1,N2,N3,N4,PVTT,T1,T2,T3,T4 | - | - | - | - | - | - | - | - |
| N4 | HBV | B2 | 2721 | G | SNV | A | 0 | 0 | 0 | 4  | 4  | 0  | 10 | HVTT,N1,N2,N3,N4,PVTT,T1,T2,T3,T4 | - | - | - | - | - | - | - | - |
| N4 | HBV | B2 | 2732 | C | SNV | T | 0 | 0 | 0 | 4  | 4  | 0  | 9  | HVTT,N1,N3,N4,PVTT,T1,T2,T3,T4    | - | - | - | - | - | - | - | - |
| N4 | HBV | B2 | 2739 | C | SNV | A | 0 | 0 | 0 | 4  | 4  | 0  | 9  | HVTT,N1,N3,N4,PVTT,T1,T2,T3,T4    | - | - | - | - | - | - | - | - |
| N4 | HBV | B2 | 2771 | G | SNV | T | 0 | 0 | 0 | 5  | 3  | 2  | 10 | HVTT,N1,N2,N3,N4,PVTT,T1,T2,T3,T4 | - | - | - | - | - | - | - | - |
| N4 | HBV | B2 | 2804 | T | SNV | C | 0 | 0 | 0 | 9  | 7  | 2  | 10 | HVTT,N1,N2,N3,N4,PVTT,T1,T2,T3,T4 | - | - | - | - | - | - | - | - |
| N4 | HBV | B2 | 2988 | A | SNV | G | 0 | 0 | 0 | 13 | 9  | 4  | 10 | HVTT,N1,N2,N3,N4,PVTT,T1,T2,T3,T4 | - | - | - | - | - | - | - | - |
| N4 | HBV | B2 | 3039 | G | SNV | A | 0 | 0 | 0 | 15 | 8  | 7  | 10 | HVTT,N1,N2,N3,N4,PVTT,T1,T2,T3,T4 | - | - | - | - | - | - | - | - |
| N4 | HBV | B2 | 3097 | C | SNV | A | 0 | 0 | 0 | 13 | 8  | 5  | 9  | HVTT,N2,N3,N4,PVTT,T1,T2,T3,T4    | - | - | - | - | - | - | - | - |
| N4 | HBV | B2 | 3109 | A | SNV | G | 0 | 0 | 0 | 14 | 7  | 7  | 9  | HVTT,N2,N3,N4,PVTT,T1,T2,T3,T4    | - | - | - | - | - | - | - | - |
| N4 | HBV | B2 | 3118 | G | SNV | A | 0 | 0 | 0 | 13 | 5  | 8  | 10 | HVTT,N1,N2,N3,N4,PVTT,T1,T2,T3,T4 | - | - | - | - | - | - | - | - |
| N4 | HBV | B2 | 3169 | T | SNV | A | 0 | 0 | 0 | 10 | 4  | 6  | 10 | HVTT,N1,N2,N3,N4,PVTT,T1,T2,T3,T4 | - | - | - | - | - | - | - | - |
| N4 | HBV | B2 | 3189 | A | SNV | C | 0 | 0 | 0 | 7  | 4  | 3  | 9  | HVTT,N2,N3,N4,PVTT,T1,T2,T3,T4    | - | - | - | - | - | - | - | - |
| N4 | HBV | B2 | 3198 | T | SNV | G | 0 | 0 | 0 | 6  | 2  | 4  | 10 | HVTT,N1,N2,N3,N4,PVTT,T1,T2,T3,T4 | - | - | - | - | - |   |   |   |



34



|      |        |      |   |     |   |   |   |   |    |    |    |    |                                   |   |   |   |    |   |   |   |                       |
|------|--------|------|---|-----|---|---|---|---|----|----|----|----|-----------------------------------|---|---|---|----|---|---|---|-----------------------|
| PVTT | HBV_B2 | 3118 | G | SNV | A | 0 | 0 | 0 | 77 | 41 | 36 | 10 | HVTT,N1,N2,N3,N4,PVTT,T1,T2,T3,T4 | 0 | 0 | 0 | 11 | 7 | 4 | 5 | HVTT,PVTT,T1,T2,T3    |
| PVTT | HBV_B2 | 3169 | T | SNV | A | 0 | 0 | 0 | 71 | 36 | 35 | 10 | HVTT,N1,N2,N3,N4,PVTT,T1,T2,T3,T4 | 0 | 0 | 0 | 16 | 8 | 8 | 5 | HVTT,PVTT,T2,T3,T4    |
| PVTT | HBV_B2 | 3189 | A | SNV | C | 0 | 0 | 0 | 70 | 41 | 29 | 9  | HVTT,N2,N3,N4,PVTT,T1,T2,T3,T4    | 0 | 0 | 0 | 17 | 9 | 8 | 6 | HVTT,PVTT,T1,T2,T3,T4 |
| PVTT | HBV_B2 | 3198 | T | SNV | G | 0 | 0 | 0 | 68 | 41 | 27 | 10 | HVTT,N1,N2,N3,N4,PVTT,T1,T2,T3,T4 | 0 | 0 | 0 | 17 | 9 | 8 | 6 | HVTT,PVTT,T1,T2,T3,T4 |





|      |    |         |          |            |        |        |        |        |        |    |    |   |   |        |        |        |        |        |        |    |    |    |   |   |   |   |
|------|----|---------|----------|------------|--------|--------|--------|--------|--------|----|----|---|---|--------|--------|--------|--------|--------|--------|----|----|----|---|---|---|---|
| PVTT | 3  | 150:150 | 15489812 | 1548981200 | 97.61% | 92.76% | 44.88% | HBV_B4 | 3.23   | 6  | 6  | 0 | 0 | 78.41% | 28.12% | 0.90%  | 0.00%  | 0.00%  | 0.00%  | -  | -  | -  | - | - | - | - |
| PVTT | 4  | 150:150 | 14177732 | 1417773200 | 97.77% | 93.15% | 42.62% | HBV_B2 | 126.71 | 61 | 61 | 0 | 0 | 79.38% | 79.31% | 79.31% | 79.31% | 79.31% | 63.76% | 61 | 47 | 59 | N | N | N | N |
| PVTT | 5  | 150:150 | 13883896 | 1388389600 | 97.78% | 93.16% | 43.77% | HBV_B2 | 19.74  | 60 | 60 | 0 | 0 | 79.32% | 79.32% | 77.05% | 5.07%  | 0.47%  | 0.00%  | 14 | 4  | 9  | N | N | N | N |
| PVTT | 7  | 150:150 | 10972672 | 1097267200 | 97.05% | 91.26% | 47.06% | HBV_B2 | 16.63  | 52 | 52 | 0 | 0 | 79.32% | 77.76% | 70.88% | 4.82%  | 0.00%  | 0.00%  | 11 | 8  | 10 | N | N | N | N |
| PVTT | 8  | 150:150 | 11581378 | 1158137800 | 97.20% | 91.52% | 46.15% | HBV_B2 | 2.24   | 3  | 3  | 0 | 0 | 61.15% | 11.36% | 0.00%  | 0.00%  | 0.00%  | 0.00%  | -  | -  | -  | - | - | - | - |
| PVTT | 10 | 150:150 | 12568740 | 1256874000 | 97.22% | 91.63% | 47.76% | HBV_B2 | 332.27 | 61 | 61 | 0 | 0 | 79.38% | 79.35% | 79.31% | 79.31% | 79.31% | 79.25% | 85 | 66 | 80 | N | N | N | N |
| PVTT | 11 | 150:150 | 10983660 | 1098366000 | 97.07% | 91.07% | 48.82% | HBV_B2 | 1.36   | 0  | 0  | 0 | 0 | 28.74% | 0.22%  | 0.00%  | 0.00%  | 0.00%  | 0.00%  | -  | -  | -  | - | - | - | - |
| PVTT | 12 | 150:150 | 8970880  | 897088000  | 97.17% | 91.44% | 47.97% | HBV_B2 | 30.54  | 61 | 61 | 0 | 0 | 79.32% | 79.32% | 78.41% | 39.38% | 9.08%  | 0.00%  | 13 | 8  | 6  | N | N | N | N |
| PVTT | 13 | 150:150 | 13251336 | 1325133600 | 96.92% | 90.98% | 48.98% | -      | -      | -  | -  | - | - | -      | -      | -      | -      | -      | -      | -  | -  | -  | - | - | - |   |
| PVTT | 19 | 150:150 | 13812898 | 1381289800 | 97.31% | 91.92% | 46.48% | HBV_B2 | 3.26   | 8  | 8  | 0 | 0 | 71.17% | 29.18% | 1.27%  | 0.00%  | 0.00%  | 0.00%  | -  | -  | -  | - | - | - | - |
| PVTT | 20 | 150:150 | 12155370 | 1215537000 | 96.18% | 88.89% | 54.99% | -      | -      | -  | -  | - | - | -      | -      | -      | -      | -      | -      | -  | -  | -  | - | - | - |   |
| PVTT | 24 | 150:150 | 11636414 | 1163641400 | 97.31% | 92.01% | 47.25% | HBV_B2 | 1.57   | 0  | 0  | 0 | 0 | 49.98% | 1.99%  | 0.00%  | 0.00%  | 0.00%  | 0.00%  | -  | -  | -  | - | - | - | - |
| PVTT | 26 | 150:150 | 11934052 | 1193405200 | 97.39% | 92.21% | 45.43% | -      | -      | -  | -  | - | - | -      | -      | -      | -      | -      | -      | -  | -  | -  | - | - | - |   |
| PVTT | 29 | 150:150 | 15647430 | 1564743000 | 97.47% | 92.41% | 45.95% | HBV_B2 | 226.1  | 61 | 61 | 0 | 0 | 79.35% | 79.32% | 79.32% | 79.32% | 79.32% | 79.07% | 76 | 71 | 65 | N | N | N | N |
| PVTT | 30 | 150:150 | 13286660 | 1328666000 | 97.16% | 91.47% | 49.53% | -      | -      | -  | -  | - | - | -      | -      | -      | -      | -      | -      | -  | -  | -  | - | - | - |   |
| PVTT | 32 | 150:150 | 10608880 | 1060888000 | 97.37% | 92.17% | 46.74% | HBV_B2 | 1.84   | 0  | 0  | 0 | 0 | 37.23% | 1.12%  | 1.06%  | 0.00%  | 0.00%  | 0.00%  | -  | -  | -  | - | - | - | - |
| PVTT | 33 | 150:150 | 10057370 | 1005737000 | 97.55% | 92.55% | 45.52% | HBV_B2 | 124.27 | 61 | 61 | 0 | 0 | 79.35% | 79.32% | 79.32% | 79.32% | 78.76% | 57.98% | 56 | 27 | 35 | N | N | N | N |
| PVTT | 35 | 150:150 | 16744094 | 1674409400 | 97.52% | 92.46% | 45.23% | HBV_B2 | 1.59   | 0  | 0  | 0 | 0 | 30.36% | 0.22%  | 0.00%  | 0.00%  | 0.00%  | 0.00%  | -  | -  | -  | - | - | - | - |
| PVTT | 36 | 150:150 | 13006422 | 1300642200 | 97.44% | 92.30% | 45.05% | HBV_B2 | 3.11   | 4  | 4  | 0 | 0 | 57.98% | 20.06% | 0.00%  | 0.00%  | 0.00%  | 0.00%  | -  | -  | -  | - | - | - | - |
| PVTT | 37 | 150:150 | 15046710 | 1504671000 | 97.28% | 91.83% | 47.27% | HBV_B2 | 1.65   | 0  | 0  | 0 | 0 | 31.88% | 0.06%  | 0.00%  | 0.00%  | 0.00%  | 0.00%  | -  | -  | -  | - | - | - | - |
| PVTT | 38 | 150:150 | 14513544 | 1451354400 | 96.40% | 89.39% | 53.85% | -      | -      | -  | -  | - | - | -      | -      | -      | -      | -      | -      | -  | -  | -  | - | - | - |   |
| PVTT | 39 | 150:150 | 19290618 | 1929061800 | 97.54% | 92.56% | 45.19% | HBV_B2 | 8.85   | 39 | 39 | 0 | 0 | 75.74% | 66.91% | 31.05% | 0.00%  | 0.00%  | 0.00%  | 5  | UC | 6  | N | N | N | N |
| PVTT | 41 | 150:150 | 17169072 | 1716907200 | 97.36% | 92.11% | 45.44% | HBV_B2 | 334.14 | 61 | 61 | 0 | 0 | 79.35% | 79.32% | 79.32% | 79.32% | 79.32% | 79.32% | 86 | 80 | 81 | N | N | N | N |
| PVTT | 43 | 150:150 | 15102886 | 1510288600 | 97.34% | 92.04% | 47.21% | HBV_B2 | 95.58  | 60 | 60 | 0 | 0 | 79.35% | 79.32% | 79.32% | 77.79% | 66.60% | 36.52% | 49 | 7  | 45 | N | N | N | N |
| PVTT | 44 | 150:150 | 17420046 | 1742004600 | 97.58% | 92.59% | 45.61% | HBV_B2 | 1.53   | 0  | 0  | 0 | 0 | 36.83% | 0.50%  | 0.00%  | 0.00%  | 0.00%  | 0.00%  | -  | -  | -  | - | - | - | - |
| PVTT | 45 | 150:150 | 16179076 | 1617907600 | 97.57% | 92.59% | 45.08% | HBV_B2 | 25.68  | 61 | 61 | 0 | 0 | 79.32% | 79.32% | 79.32% | 18.82% | 3.48%  | 0.00%  | 22 | 13 | 9  | N | N | N | N |
| PVTT | 47 | 150:150 | 18218828 | 1821882800 | 97.47% | 92.29% | 43.98% | -      | -      | -  | -  | - | - | -      | -      | -      | -      | -      | -      | -  | -  | -  | - | - | - |   |
| PVTT | 48 | 150:150 | 18535972 | 1853597200 | 97.33% | 91.95% | 44.42% | HBV_B2 | 5.7    | 22 | 22 | 0 | 0 | 78.48% | 56.95% | 7.27%  | 0.00%  | 0.00%  | 0.00%  | 4  | 5  | 3  | N | N | N | N |
| PVTT | 49 | 150:150 | 19255210 | 1925521000 | 97.46% | 92.35% | 44.36% | HBV_B2 | 1.33   | 0  | 0  | 0 | 0 | 48.12% | 0.13%  | 0.00%  | 0.00%  | 0.00%  | 0.00%  | -  | -  | -  | - | - | - | - |
| PVTT | 50 | 150:150 | 16264936 | 1626493600 | 97.50% | 92.37% | 44.81% | -      | -      | -  | -  | - | - | -      | -      | -      | -      | -      | -      | -  | -  | -  | - | - | - |   |
| PVTT | 51 | 150:150 | 15688752 | 1568875200 | 97.30% | 91.83% | 44.86% | HBV_B2 | 1.17   | 0  | 0  | 0 | 0 | 27.12% | 0.00%  | 0.00%  | 0.00%  | 0.00%  | 0.00%  | -  | -  | -  | - | - | - | - |
| PVTT | 52 | 150:150 | 19086990 | 1908699000 | 97.63% | 92.74% | 43.28% | HBV_B2 | 1.74   | 1  | 1  | 0 | 0 | 38.94% | 3.92%  | 0.00%  | 0.00%  | 0.00%  | 0.00%  | -  | -  | -  | - | - | - | - |
| PVTT | 55 | 150:150 | 20067218 | 2006721800 | 97.24% | 91.66% | 46.69% | HBV_B2 | 1.58   | 0  | 0  | 0 | 0 | 36.14% | 1.93%  | 0.00%  | 0.00%  | 0.00%  | 0.00%  | -  | -  | -  | - | - | - | - |
| PVTT | 56 | 150:150 | 17863476 | 1786347600 | 97.44% | 92.26% | 44.71% | HBV_B2 | 1.48   | 0  | 0  | 0 | 0 | 47.15% | 1.90%  | 0.00%  | 0.00%  | 0.00%  | 0.00%  | -  | -  | -  | - | - | - | - |
| PVTT | 57 | 150:150 | 21365008 | 2136500800 | 97.20% | 91.59% | 46.85% | HBV_B2 | 1.64   | 0  | 0  | 0 | 0 | 53.09% | 1.31%  | 0.00%  | 0.00%  | 0.00%  | 0.00%  | -  | -  | -  | - | - | - | - |
| PVTT | 60 | 150:150 | 18364200 | 1836420000 | 97.47% | 92.38% | 44.31% | HBV_B2 | 1.95   | 0  | 0  | 0 | 0 | 50.64% | 2.92%  | 0.00%  | 0.00%  | 0.00%  | 0.00%  | -  | -  | -  | - | - | - | - |
| PVTT | 62 | 150:150 | 20921120 | 2092112000 | 96.77% | 90.44% | 49.96% | HBV_B9 | 1.75   | 0  | 0  | 0 | 0 | 52.10% | 4.17%  | 0.00%  | 0.00%  | 0.00%  | 0.00%  | -  | -  | -  | - | - | - | - |
| PVTT | 63 | 150:150 | 19104408 | 1910440800 | 97.17% | 91.47% | 47.63% | HBV_B2 | 1.75   | 1  | 1  | 0 | 0 | 44.82% | 3.86%  | 0.00%  | 0.00%  | 0.00%  | 0.00%  | -  | -  | -  | - | - | - | - |
| PVTT | 64 | 150:150 | 19430640 | 1943064000 | 96.60% | 90.17% | 51.58% | HBV_B2 | 320.9  | 61 | 61 | 0 | 0 | 79.38% | 79.31% | 79.31% | 79.31% | 79.31% | 74.37% | 83 | 56 | 67 | N | N | N | N |
| PVTT | 66 | 150:150 | 19388824 | 1938882400 | 97.13% | 91.42% | 47.27% | HBV_B2 | 2.4    | 1  | 1  | 0 | 0 | 38.57% | 4.79%  | 0.00%  | 0.00%  | 0.00%  | 0.00%  | -  | -  | -  | - | - | - | - |
| PVTT | 69 | 150:150 | 21676184 | 2167618400 | 96.89% | 90.76% | 49.54% | HBV_B2 | 1.61   | 1  | 1  | 0 | 0 | 36.05% | 2.89%  | 0.00%  | 0.00%  | 0.00%  | 0.00%  | -  | -  | -  | - | - | - | - |
| PVTT | 70 | 150:150 | 23988962 | 2398896200 | 97.30% | 91.90% | 46.28% | HBV_B2 | 256.53 | 61 | 61 | 0 | 0 | 79.38% | 79.35% | 79.31% | 79.31% | 79.31% | 73.87% | 78 | 84 | 49 | N | N | N | N |
| PVTT | 71 | 150:150 | 26934638 | 2693463800 | 96.63% | 90.02% | 51.45% | HBV_B2 | 2.08   | 0  | 0  | 0 | 0 | 50.73% | 6.35%  | 0.00%  | 0.00%  | 0.00%  | 0.00%  | -  | -  | -  | - | - | - | - |
| PVTT | 72 | 150:150 | 31297816 | 3129781600 | 97.14% | 91.48% | 47.57% | HBV_B2 | 2.48   | 1  | 1  | 0 | 0 | 60.90% | 12.63% | 0.00%  | 0.00%  | 0.00%  | 0.00%  | -  | -  | -  | - | - | - | - |

1. All HBV sequences are from the constructed HBV genome.
2. Upstream partner is in blue, and downstream partner is in yellow.
3. Mutated position on HBV genome is marked by asterisk and frame.
4. Red cells harbouring nucleotides that align to both reference sequences are micro-homologies.

40

|                  |                                 |                                               |  |  |  |  |  |  |  |  |  |                                                                |                                                             |                                           |                                |                       |  |  |  |  |  |  |  |  |
|------------------|---------------------------------|-----------------------------------------------|--|--|--|--|--|--|--|--|--|----------------------------------------------------------------|-------------------------------------------------------------|-------------------------------------------|--------------------------------|-----------------------|--|--|--|--|--|--|--|--|
|                  | Chr1                            | AGGGAGCATTCTCTGGTGTGGCTAAAGTGAAGCTACTTAAAA    |  |  |  |  |  |  |  |  |  | TAGTCT                                                         | AAGAGACAG                                                   | ACTGGAAAGATTGGGGTGGGGCTCTTTCTGGAAGAGCCTTC |                                |                       |  |  |  |  |  |  |  |  |
| Human_breakpoint | chr8:118557874-; as upstream    |                                               |  |  |  |  |  |  |  |  |  |                                                                |                                                             |                                           |                                |                       |  |  |  |  |  |  |  |  |
| HBV_breakpoint   | HBV_B2:480+; as downstream      |                                               |  |  |  |  |  |  |  |  |  |                                                                |                                                             |                                           |                                |                       |  |  |  |  |  |  |  |  |
| shared_Cells     | T2: NO.102; T2:NO.110           |                                               |  |  |  |  |  |  |  |  |  |                                                                |                                                             |                                           |                                |                       |  |  |  |  |  |  |  |  |
| NO.9             | Chr8                            | upstream (5')                                 |  |  |  |  |  |  |  |  |  | downstream (3')                                                |                                                             |                                           |                                |                       |  |  |  |  |  |  |  |  |
|                  | Integration                     | ATTGCCCTCCACCATCTGAAAGAAAAAGACCCTTCTCCACCGAC  |  |  |  |  |  |  |  |  |  | TCCCTCTCCCTCTCCCCACAAATACAGAAACAGTTGTAAACAAGCAAGAAAGGAC        |                                                             |                                           |                                |                       |  |  |  |  |  |  |  |  |
|                  | HBV_B2                          | ATTGCCCTCCACCATCTGAAAGAAAAAGACCCTTCTGCCACCGAC |  |  |  |  |  |  |  |  |  | TCCCTCTCATTCCAGGATCATCAACAACCAGCACCGGACCATGCAAAACCTGCACA       |                                                             |                                           |                                |                       |  |  |  |  |  |  |  |  |
|                  |                                 | CTTCTTGTGGTTCTTCTGGACTATCAAGGTATGTTGCCCGTTTG  |  |  |  |  |  |  |  |  |  | TCCCTCTCATTCCAGGATCATCAACAACCAGCACCGGACCATGCAAAACCTGCACA       |                                                             |                                           |                                |                       |  |  |  |  |  |  |  |  |
| Human_breakpoint | chr8:118557559-; as upstream    |                                               |  |  |  |  |  |  |  |  |  |                                                                |                                                             |                                           |                                |                       |  |  |  |  |  |  |  |  |
| HBV_breakpoint   | HBV_B2:969+; as downstream      |                                               |  |  |  |  |  |  |  |  |  |                                                                |                                                             |                                           |                                |                       |  |  |  |  |  |  |  |  |
| shared_Cells     | T2: NO.105; T4:NO.56; HVTT:NO.8 |                                               |  |  |  |  |  |  |  |  |  |                                                                |                                                             |                                           |                                |                       |  |  |  |  |  |  |  |  |
| NO.10            | Chr8                            | upstream (5')                                 |  |  |  |  |  |  |  |  |  | downstream (3')                                                |                                                             |                                           |                                |                       |  |  |  |  |  |  |  |  |
|                  | Integration                     | TTCAAATTCGCTCTGAGACTGTTTGATGCTTTAGTTATT       |  |  |  |  |  |  |  |  |  | TCTCAACCTGGACTATTGTTGGTACCTTGGCAAGCCCTTTCTATTTCATCTGTCTATGCTTT |                                                             |                                           |                                |                       |  |  |  |  |  |  |  |  |
|                  | HBV_B2                          | TTCAAATTCGCTCTGAGACTGTTTGATGCTTTAGTTATT       |  |  |  |  |  |  |  |  |  | TCTCAACCTGGCCTATTGATTGGAAAGTATGTCAACGCATTGTGGGTCTTTTGGGGTTTG   |                                                             |                                           |                                |                       |  |  |  |  |  |  |  |  |
|                  |                                 | CATATTGTACAAAAAATCAAAATGTGTTTT                |  |  |  |  |  |  |  |  |  | CGGAACTTCC                                                     | TGTAAACCGGCCTATTGATTGGAAAGTATGTCAACGCATTGTGGGTCTTTTGGGGTTTG |                                           |                                |                       |  |  |  |  |  |  |  |  |
| HBV_breakpoint   | HBV_B2:1982+; as upstream       |                                               |  |  |  |  |  |  |  |  |  |                                                                |                                                             |                                           |                                |                       |  |  |  |  |  |  |  |  |
| HBV_breakpoint   | HBV_B2:2429-; as downstream     |                                               |  |  |  |  |  |  |  |  |  |                                                                |                                                             |                                           |                                |                       |  |  |  |  |  |  |  |  |
| shared_Cells     | T3: NO.51; T3:NO.116            |                                               |  |  |  |  |  |  |  |  |  |                                                                |                                                             |                                           |                                |                       |  |  |  |  |  |  |  |  |
| NO.11            | HBV_B2                          | upstream (5')                                 |  |  |  |  |  |  |  |  |  | downstream (3')                                                |                                                             |                                           |                                |                       |  |  |  |  |  |  |  |  |
|                  | Integration                     | TTCTGTGGAGTTACTCTCTTTTTTGCCTTCTGACTTCT        |  |  |  |  |  |  |  |  |  | TTCCCTTCTATT                                                   | CGAGATCTCT                                                  | CGACACCGCC                                | CTCTGCTCTG                     | CATCGGGAGGCCTTAGAGTCT |  |  |  |  |  |  |  |  |
|                  | HBV_B2                          | TTCTGTGGAGTTACTCTCTTTTTTGCCTTCTGACTTCT        |  |  |  |  |  |  |  |  |  | TTCCCTTCTATT                                                   | CGAGATCTCT                                                  | CTCGACGCGGCG                              | GATTGAGACCTTCGTCTGCGAGGCGAGGGA |                       |  |  |  |  |  |  |  |  |
|                  |                                 | TTTCCACCTTATGTGTCCAAGGAATACTAACATTGAGA        |  |  |  |  |  |  |  |  |  | TTCCCGAGATT                                                    | GAGATCTCT                                                   | CTCGACGCGGCG                              | GATTGAGACCTTCGTCTGCGAGGCGAGGGA |                       |  |  |  |  |  |  |  |  |



|      |           |           |   |   |   |   |   |   |   |   |   |   |   |      |      |       |       |       |       |       |       |       |
|------|-----------|-----------|---|---|---|---|---|---|---|---|---|---|---|------|------|-------|-------|-------|-------|-------|-------|-------|
| chr1 | 67267556  | 67277555  | 1 | 1 | 2 | 1 | 1 | 1 | 0 | 0 | 0 | 0 | 0 | 1.17 | 0.41 | -0.41 | -0.41 | 2.04  | -0.41 | -0.41 | -0.41 |       |
| chr1 | 67277556  | 68938155  | 3 | 3 | 4 | 3 | 3 | 3 | 1 | 1 | 2 | 1 | 1 | 1    | 3.17 | 0.41  | -0.41 | -0.41 | 2.04  | -0.41 | -0.41 | -0.41 |
| chr1 | 68938156  | 68948155  | 3 | 3 | 4 | 3 | 3 | 3 | 1 | 1 | 2 | 1 | 1 | 1    | 3.17 | 0.41  | -0.41 | -0.41 | 2.04  | -0.41 | -0.41 | -0.41 |
| chr1 | 68948156  | 70558155  | 3 | 3 | 4 | 3 | 3 | 3 | 1 | 1 | 2 | 1 | 1 | 1    | 3.17 | 0.41  | -0.41 | -0.41 | 2.04  | -0.41 | -0.41 | -0.41 |
| chr1 | 70558156  | 70568155  | 3 | 3 | 4 | 3 | 3 | 3 | 1 | 1 | 2 | 1 | 1 | 1    | 3.17 | 0.41  | -0.41 | -0.41 | 2.04  | -0.41 | -0.41 | -0.41 |
| chr1 | 70568156  | 70908155  | 3 | 3 | 4 | 3 | 3 | 3 | 1 | 1 | 2 | 1 | 1 | 1    | 3.17 | 0.41  | -0.41 | -0.41 | 2.04  | -0.41 | -0.41 | -0.41 |
| chr1 | 70908156  | 70918155  | 3 | 3 | 4 | 3 | 3 | 3 | 1 | 1 | 2 | 1 | 1 | 1    | 3.17 | 0.41  | -0.41 | -0.41 | 2.04  | -0.41 | -0.41 | -0.41 |
| chr1 | 70918156  | 74341755  | 3 | 3 | 4 | 3 | 3 | 3 | 1 | 1 | 2 | 1 | 1 | 1    | 3.17 | 0.41  | -0.41 | -0.41 | 2.04  | -0.41 | -0.41 | -0.41 |
| chr1 | 74341756  | 85953155  | 3 | 3 | 3 | 3 | 3 | 3 | 1 | 1 | 1 | 1 | 1 | 1    | 3    | 0     | 0     | 0     | 0     | 0     | 0     | 0     |
| chr1 | 85953156  | 85963155  | 3 | 3 | 3 | 3 | 3 | 3 | 1 | 1 | 1 | 1 | 1 | 1    | 3    | 0     | 0     | 0     | 0     | 0     | 0     | 0     |
| chr1 | 85963156  | 85973355  | 3 | 3 | 3 | 6 | 3 | 3 | 1 | 1 | 1 | 3 | 1 | 1    | 3.5  | 1.22  | -0.41 | -0.41 | -0.41 | 2.04  | -0.41 | -0.41 |
| chr1 | 85973356  | 85983355  | 3 | 6 | 6 | 6 | 7 | 6 | 1 | 3 | 2 | 3 | 2 | 2    | 5.67 | 1.37  | -1.95 | 0.24  | 0.24  | 0.24  | 0.98  | 0.24  |
| chr1 | 85983356  | 86003155  | 5 | 6 | 6 | 6 | 7 | 6 | 2 | 3 | 2 | 3 | 2 | 2    | 6    | 0.63  | -1.58 | 0     | 0     | 0     | 1.58  | 0     |
| chr1 | 86003156  | 86013155  | 5 | 6 | 6 | 6 | 7 | 6 | 2 | 3 | 2 | 3 | 2 | 2    | 6    | 0.63  | -1.58 | 0     | 0     | 0     | 1.58  | 0     |
| chr1 | 86013156  | 86023355  | 5 | 6 | 6 | 3 | 7 | 6 | 2 | 3 | 2 | 1 | 2 | 2    | 5.5  | 1.38  | -0.36 | 0.36  | 0.36  | -1.81 | 1.09  | 0.36  |
| chr1 | 86023356  | 86033355  | 5 | 3 | 3 | 3 | 3 | 3 | 2 | 1 | 1 | 1 | 1 | 1    | 3.33 | 0.82  | 2.04  | -0.41 | -0.41 | -0.41 | -0.41 | -0.41 |
| chr1 | 86033356  | 101712155 | 3 | 3 | 3 | 3 | 3 | 3 | 1 | 1 | 1 | 1 | 1 | 1    | 3    | 0     | 0     | 0     | 0     | 0     | 0     | 0     |
| chr1 | 101712156 | 101722155 | 3 | 3 | 3 | 3 | 3 | 3 | 1 | 1 | 1 | 1 | 1 | 1    | 3    | 0     | 0     | 0     | 0     | 0     | 0     | 0     |
| chr1 | 101722156 | 107919350 | 3 | 3 | 3 | 3 | 3 | 3 | 1 | 1 | 1 | 1 | 1 | 1    | 3    | 0     | 0     | 0     | 0     | 0     | 0     | 0     |
| chr1 | 107919351 | 107929350 | 3 | 3 | 3 | 3 | 3 | 3 | 1 | 1 | 1 | 1 | 1 | 1    | 3    | 0     | 0     | 0     | 0     | 0     | 0     | 0     |
| chr1 | 107929351 | 118574150 | 3 | 3 | 3 | 3 | 3 | 3 | 1 | 1 | 1 | 1 | 1 | 1    | 3    | 0     | 0     | 0     | 0     | 0     | 0     | 0     |
| chr1 | 118574151 | 118584150 | 3 | 3 | 3 | 3 | 3 | 3 | 1 | 1 | 1 | 1 | 1 | 1    | 3    | 0     | 0     | 0     | 0     | 0     | 0     | 0     |
| chr1 | 118584151 | 119064150 | 3 | 3 | 3 | 3 | 3 | 3 | 1 | 1 | 1 | 1 | 1 | 1    | 3    | 0     | 0     | 0     | 0     | 0     | 0     | 0     |
| chr1 | 119064151 | 119074150 | 3 | 3 | 3 | 3 | 3 | 3 | 1 | 1 | 1 | 1 | 1 | 1    | 3    | 0     | 0     | 0     | 0     | 0     | 0     | 0     |
| chr1 | 119074151 | 120523550 | 3 | 3 | 3 | 3 | 3 | 3 | 1 | 1 | 1 | 1 | 1 | 1    | 3    | 0     | 0     | 0     | 0     | 0     | 0     | 0     |
| chr1 | 120523551 | 120533550 | 3 | 3 | 5 | 3 | 3 | 3 | 1 | 1 | 1 | 1 | 1 | 1    | 3.33 | 0.82  | -0.41 | -0.41 | 2.04  | -0.41 | -0.41 | -0.41 |
| chr1 | 120533551 | 121133945 | 4 | 4 | 5 | 5 | 4 | 4 | 2 | 2 | 1 | 1 | 1 | 2    | 4.33 | 0.52  | -0.65 | -0.65 | 1.29  | 1.29  | -0.65 | -0.65 |
| chr1 | 121133946 | 121143945 | 4 | 4 | 5 | 5 | 4 | 4 | 2 | 2 | 1 | 1 | 1 | 2    | 4.33 | 0.52  | -0.65 | -0.65 | 1.29  | 1.29  | -0.65 | -0.65 |
| chr1 | 121143946 | 121153945 | 3 | 4 | 5 | 5 | 3 | 3 | 1 | 2 | 1 | 1 | 1 | 1    | 3.83 | 0.98  | -0.85 | 0.17  | 1.19  | 1.19  | -0.85 | -0.85 |
| chr1 | 121153946 | 121383945 | 3 | 3 | 3 | 3 | 3 | 3 | 1 | 1 | 0 | 1 | 1 | 1    | 3    | 0     | 0     | 0     | 0     | 0     | 0     | 0     |
| chr1 | 121383946 | 121393945 | 3 | 3 | 3 | 3 | 3 | 3 | 1 | 1 | 0 | 1 | 1 | 1    | 3    | 0     | 0     | 0     | 0     | 0     | 0     | 0     |
| chr1 | 121393946 | 121465745 | 3 | 3 | 3 | 3 | 3 | 3 | 1 | 1 | 0 | 1 | 1 | 1    | 3    | 0     | 0     | 0     | 0     | 0     | 0     | 0     |
| chr1 | 121465746 | 142545540 | 3 | 3 | 3 | 3 | 3 | 3 | 1 | 1 | 0 | 1 | 1 | 1    | 3    | 0     | 0     | 0     | 0     | 0     | 0     | 0     |
| chr1 | 142545541 | 142645540 | 4 | 5 | 4 | 4 | 5 | 4 | 2 | 2 | 0 | 0 | 1 | 1    | 4.33 | 0.52  | -0.65 | 1.29  | -0.65 | -0.65 | 1.29  | -0.65 |
| chr1 | 142645541 | 142655540 | 4 | 5 | 4 | 4 | 5 | 4 | 2 | 2 | 0 | 0 | 1 | 1    | 4.33 | 0.52  | -0.65 | 1.29  | -0.65 | -0.65 | 1.29  | -0.65 |
| chr1 | 142655541 | 142905735 | 4 | 5 | 4 | 4 | 4 | 4 | 2 | 2 | 0 | 0 | 1 | 1    | 4.17 | 0.41  | -0.41 | 2.04  | -0.41 | -0.41 | -0.41 | -0.41 |
| chr1 | 142905736 | 142915735 | 4 | 5 | 4 | 4 | 4 | 4 | 2 | 2 | 0 | 0 | 1 | 1    | 4.17 | 0.41  | -0.41 | 2.04  | -0.41 | -0.41 | -0.41 | -0.41 |
| chr1 | 142915736 | 142965735 | 4 | 5 | 4 | 4 | 5 | 5 | 2 | 2 | 0 | 0 | 2 | 2    | 4.5  | 0.55  | -0.91 | 0.91  | -0.91 | -0.91 | 0.91  | 0.91  |
| chr1 | 142965736 | 143125930 | 4 | 5 | 4 | 4 | 5 | 5 | 2 | 2 | 0 | 0 | 2 | 2    | 4.5  | 0.55  | -0.91 | 0.91  | -0.91 | -0.91 | 0.91  | 0.91  |
| chr1 | 143125931 | 143285930 | 4 | 4 | 3 | 3 | 3 | 4 | 2 | 2 | 0 | 1 | 1 | 1    | 3.5  | 0.55  | 0.91  | 0.91  | -0.91 | -0.91 | -0.91 | 0.91  |
| chr1 | 143285931 | 143346125 | 4 | 4 | 3 | 3 | 3 | 4 | 2 | 2 | 0 | 1 | 1 | 1    | 3.5  | 0.55  | 0.91  | 0.91  | -0.91 | -0.91 | -0.91 | 0.91  |
| chr1 | 143346126 | 143536125 | 4 | 6 | 5 | 5 | 6 | 6 | 2 | 3 | 1 | 2 | 2 | 3    | 5.33 | 0.82  | -1.63 | 0.82  | -0.41 | -0.41 | 0.82  | 0.82  |
| chr1 | 143536126 | 143646325 | 4 | 6 | 5 | 5 | 6 | 6 | 2 | 3 | 1 | 2 | 2 | 3    | 5.33 | 0.82  | -1.63 | 0.82  | -0.41 | -0.41 | 0.82  | 0.82  |
| chr1 | 143646326 | 143966520 | 7 | 8 | 8 | 8 | 8 | 8 | 2 | 3 | 0 | 2 | 4 | 4    | 7.83 | 0.41  | -2.04 | 0.41  | 0.41  | 0.41  | 0.41  | 0.41  |
| chr1 | 143966521 | 143976520 | 7 | 8 | 8 | 8 | 8 | 8 | 2 | 3 | 0 | 2 | 4 | 4    | 7.83 | 0.41  | -2.04 | 0.41  | 0.41  | 0.41  | 0.41  | 0.41  |
| chr1 | 143976521 | 144006520 | 6 | 8 | 8 | 8 | 8 | 8 | 1 | 3 | 0 | 0 | 4 | 4    | 7.67 | 0.82  | -2.04 | 0.41  | 0.41  | 0.41  | 0.41  | 0.41  |
| chr1 | 144006521 | 144076520 | 6 | 8 | 8 | 8 | 8 | 7 | 1 | 4 | 0 | 0 | 4 | 3    | 7.5  | 0.84  | -1.79 | 0.6   | 0.6   | 0.6   | 0.6   | -0.6  |
| chr1 | 144076521 | 144086520 | 6 | 8 | 8 | 8 | 8 | 7 | 1 | 4 | 0 | 0 | 4 | 3    | 7.5  | 0.84  | -1.79 | 0.6   | 0.6   | 0.6   | 0.6   | -0.6  |
| chr1 | 144086521 | 144216715 | 6 | 8 | 8 | 8 | 8 | 8 | 3 | 4 | 0 | 0 | 4 | 4    | 7.67 | 0.82  | -2.04 | 0.41  | 0.41  | 0.41  | 0.41  | 0.41  |
| chr1 | 144216716 | 144276910 | 6 | 8 | 8 | 8 | 8 | 8 | 3 | 4 | 0 | 0 | 4 | 4    | 7.67 | 0.82  | -2.04 | 0.41  | 0.41  | 0.41  | 0.41  | 0.41  |
| chr1 | 144276911 | 144708900 | 4 | 5 | 5 | 5 | 5 | 4 | 2 | 2 | 1 | 1 | 2 | 1    | 4.67 | 0.52  | -1.29 | 0.65  | 0.65  | 0.65  | 0.65  | -1.29 |
| chr1 | 144708901 | 144818295 | 4 | 5 | 5 | - | 5 | 4 | 2 | 2 | 1 | - | 2 | 1    | -    | -     | -     | -     | -     | -     | -     | -     |
| chr1 | 144818296 | 145079095 | 5 | 6 | 7 | 6 | 6 | 6 | 2 | 2 | 0 | 1 | 1 | 2    | 6    | 0.63  | -1.58 | 0     | 1.58  | 0     | 0     | 0     |
| chr1 | 145079096 | 145089095 | 5 | 6 | 7 | 6 | 6 | 6 | 2 | 2 | 0 | 1 | 1 | 2    | 6    | 0.63  | -1.58 | 0     | 1.58  | 0     | 0     | 0     |
| chr1 | 145089096 | 145099095 | 5 | 6 | 7 | 6 | 8 | 8 | 2 | 2 | 0 | 1 | 2 | 2    | 6.67 | 1.21  | -1.38 | -0.55 | 0.28  | -0.55 | 1.1   | 1.1   |
| chr1 | 145099096 | 145109095 | 5 | 8 | 7 | 6 | 8 | 8 | 2 | 2 | 0 | 1 | 2 | 2    | 7    | 1.26  | -1.58 | 0.79  | 0     | -0.79 | 0.79  | 0.79  |
| chr1 | 145109096 | 145119095 | 7 | 8 | 7 | 6 | 8 | 8 | 2 | 2 | 0 | 1 | 2 | 2    | 7.33 | 0.82  | -0.41 | 0.82  | -0.41 | -1.63 | 0.82  | 0.82  |
| chr1 | 145119096 | 145379295 | 7 | 8 | 8 | 8 | 8 | 8 | 2 | 2 | 0 | 1 | 2 | 2    | 7.83 | 0.41  | -2.04 | 0.41  | 0.41  | 0.41  | 0.41  | 0.41  |
| chr1 | 145379296 | 145389295 | 7 | 8 | 8 | 8 | 8 | 8 | 2 | 2 | 0 | 1 | 2 | 2    | 7.83 | 0.41  | -2.04 | 0.41  | 0.41  | 0.41  | 0.41  | 0.41  |
| chr1 | 145389296 | 146399885 | 7 | 8 | 8 | 8 | 8 | 8 | 2 | 2 | 0 | 1 | 2 | 2    | 7.83 | 0.41  | -2.04 | 0.41  | 0.41  | 0.41  | 0.41  | 0.41  |
| chr1 | 146399886 | 146409885 | 7 | 8 | 8 | 8 | 8 | 8 | 2 | 2 | 0 | 1 | 2 | 2    | 7.83 | 0.41  | -2.04 | 0.41  | 0.41  | 0.41  | 0.41  | 0.41  |
| chr1 | 146409886 | 146459885 | 7 | 8 | 8 | 8 | 8 | 7 | 2 | 2 | 0 | 1 | 2 | 3    | 7.67 | 0.52  | -1.29 | 0.65  | 0.65  | 0.65  | 0.65  | -1.29 |
| chr1 | 146459886 | 146469885 | 7 | 8 | 8 | 8 | 8 | 7 | 2 | 2 | 0 | 1 | 2 | 3    | 7.67 | 0.52  | -1.29 | 0.65  | 0.65  | 0.65  | 0.65  | -1.29 |
| chr1 | 146469886 | 147929085 | 7 | 8 | 8 | 8 | 8 | 8 | 2 | 2 | 0 | 1 | 2 | 2    | 7.83 | 0.41  | -2.04 | 0.41  | 0.41  | 0.41  | 0.41  | 0.41  |
| chr1 | 147929086 | 147939085 | 7 | 8 | 8 | 8 | 8 | 8 | 2 | 2 | 0 | 1 | 2 | 2    | 7.83 | 0.41  | -2.04 | 0.41  | 0.41  | 0.41  | 0.41  | 0.41  |
| chr1 | 147939086 | 147970085 | 7 | 5 | 5 | 5 | 8 | 6 | 2 | 1 | 0 | 0 | 2 | 1    | 6    | 1.26  | 0.79  | -0.79 | -0.79 | -0.79 | 1.58  | 0     |
| chr1 | 147970086 | 147980485 | 7 | 5 | 5 | 5 | 8 | 6 | 2 | 1 | 0 | 0 | 2 | 1    | 6    | 1.26  | 0.79  | -0.79 | -0.79 | -0.79 | 1.58  | 0     |
| chr1 | 147980486 | 148019885 | 4 | 5 | 5 | 5 | 5 | 6 | 2 | 1 | 0 | 0 | 2 | 1    | 5    | 0.63  | -1.58 | 0     | 0     | 0     | 0     | 1.58  |
| chr1 | 148019886 | 148180080 | 4 | 5 | 5 | 5 | 5 | 6 | 2 | 1 | 0 | 0 | 2 | 1    | 5    | 0.63  | -1.58 | 0     | 0     | 0     | 0     | 1.58  |
| chr1 | 148180081 | 149031070 | 6 | 8 | 8 | 8 | 8 | 8 | 2 | 3 | 1 | 1 | 3 | 2    | 7.67 | 0.82  | -2.04 | 0.41  | 0.41  | 0.41  | 0.41  | 0.41  |
| chr1 | 149031071 | 149041070 |   |   |   |   |   |   |   |   |   |   |   |      |      |       |       |       |       |       |       |       |

|      |           |           |   |   |   |   |   |   |   |   |   |   |   |   |      |      |       |        |       |       |       |       |      |
|------|-----------|-----------|---|---|---|---|---|---|---|---|---|---|---|---|------|------|-------|--------|-------|-------|-------|-------|------|
| chr1 | 149451071 | 149511270 | 7 | 8 | 8 | 8 | 8 | 8 | 2 | 1 | 0 | 1 | 1 | 1 | 7.83 | 0.41 | -2.04 | 0.41   | 0.41  | 0.41  | 0.41  | 0.41  | 0.41 |
| chr1 | 149511271 | 149522070 | 7 | 6 | 8 | 6 | 6 | 8 | 2 | 2 | 0 | 1 | 1 | 1 | 6.83 | 0.98 | 0.17  | -0.85  | 1.19  | -0.85 | -0.85 | 1.19  |      |
| chr1 | 149522071 | 149532470 | 7 | 6 | 6 | 6 | 6 | 6 | 2 | 2 | 0 | 1 | 1 | 1 | 6.17 | 0.41 | 2.04  | -0.41  | -0.41 | -0.41 | -0.41 | -0.41 |      |
| chr1 | 149532471 | 149702870 | 5 | 6 | 6 | 6 | 6 | 6 | 2 | 2 | 0 | 1 | 1 | 1 | 5.83 | 0.41 | -2.04 | 0.41   | 0.41  | 0.41  | 0.41  | 0.41  |      |
| chr1 | 149702871 | 149712870 | 5 | 6 | 6 | 6 | 6 | 6 | 2 | 2 | 0 | 1 | 1 | 1 | 5.83 | 0.41 | -2.04 | 0.41   | 0.41  | 0.41  | 0.41  | 0.41  |      |
| chr1 | 149712871 | 149743670 | 6 | 8 | 8 | 8 | 8 | 7 | 2 | 2 | 0 | 1 | 3 | 3 | 7.5  | 0.84 | -1.79 | 0.6    | 0.6   | 0.6   | 0.6   | -0.6  |      |
| chr1 | 149743671 | 149753670 | 6 | 8 | 8 | 8 | 8 | 7 | 2 | 2 | 0 | 1 | 3 | 3 | 7.5  | 0.84 | -1.79 | 0.6    | 0.6   | 0.6   | 0.6   | -0.6  |      |
| chr1 | 149753671 | 149772870 | 7 | 8 | 8 | 8 | 8 | 8 | 2 | 2 | 0 | 1 | 3 | 2 | 7.83 | 0.41 | -2.04 | 0.41   | 0.41  | 0.41  | 0.41  | 0.41  |      |
| chr1 | 149772871 | 149782870 | 7 | 8 | 8 | 8 | 8 | 8 | 2 | 2 | 0 | 1 | 3 | 2 | 7.83 | 0.41 | -2.04 | 0.41   | 0.41  | 0.41  | 0.41  | 0.41  |      |
| chr1 | 149782871 | 152152870 | 7 | 8 | 8 | 8 | 8 | 8 | 2 | 2 | 0 | 1 | 2 | 2 | 7.83 | 0.41 | -2.04 | 0.41   | 0.41  | 0.41  | 0.41  | 0.41  |      |
| chr1 | 152152871 | 152162870 | 7 | 8 | 8 | 8 | 8 | 8 | 2 | 2 | 0 | 1 | 2 | 2 | 7.83 | 0.41 | -2.04 | 0.41   | 0.41  | 0.41  | 0.41  | 0.41  |      |
| chr1 | 152162871 | 153462870 | 7 | 8 | 8 | 8 | 8 | 8 | 2 | 2 | 0 | 1 | 2 | 2 | 7.83 | 0.41 | -2.04 | 0.41   | 0.41  | 0.41  | 0.41  | 0.41  |      |
| chr1 | 153462871 | 153472870 | 7 | 8 | 8 | 8 | 8 | 8 | 2 | 2 | 0 | 1 | 2 | 2 | 7.83 | 0.41 | -2.04 | 0.41   | 0.41  | 0.41  | 0.41  | 0.41  |      |
| chr1 | 153472871 | 156772870 | 7 | 8 | 8 | 8 | 8 | 8 | 2 | 2 | 0 | 1 | 2 | 2 | 7.83 | 0.41 | -2.04 | 0.41   | 0.41  | 0.41  | 0.41  | 0.41  |      |
| chr1 | 156772871 | 156782870 | 7 | 8 | 8 | 8 | 8 | 8 | 2 | 2 | 0 | 1 | 2 | 2 | 7.83 | 0.41 | -2.04 | 0.41   | 0.41  | 0.41  | 0.41  | 0.41  |      |
| chr1 | 156782871 | 158292870 | 7 | 8 | 8 | 8 | 8 | 8 | 2 | 2 | 0 | 1 | 1 | 2 | 7.83 | 0.41 | -2.04 | 0.41   | 0.41  | 0.41  | 0.41  | 0.41  |      |
| chr1 | 158292871 | 158302870 | 7 | 8 | 8 | 8 | 8 | 8 | 2 | 2 | 0 | 1 | 1 | 2 | 7.83 | 0.41 | -2.04 | 0.41   | 0.41  | 0.41  | 0.41  | 0.41  |      |
| chr1 | 158302871 | 158792870 | 7 | 8 | 8 | 8 | 8 | 8 | 2 | 2 | 0 | 1 | 1 | 2 | 7.83 | 0.41 | -2.04 | 0.41   | 0.41  | 0.41  | 0.41  | 0.41  |      |
| chr1 | 158792871 | 158802870 | 7 | 8 | 8 | 8 | 8 | 8 | 2 | 2 | 0 | 1 | 1 | 2 | 7.83 | 0.41 | -2.04 | 0.41   | 0.41  | 0.41  | 0.41  | 0.41  |      |
| chr1 | 158802871 | 160966070 | 7 | 8 | 8 | 8 | 8 | 8 | 2 | 2 | 0 | 1 | 2 | 2 | 7.83 | 0.41 | -2.04 | 0.41   | 0.41  | 0.41  | 0.41  | 0.41  |      |
| chr1 | 160966071 | 160976070 | 7 | 8 | 8 | 8 | 8 | 8 | 2 | 2 | 0 | 1 | 2 | 2 | 7.83 | 0.41 | -2.04 | 0.41   | 0.41  | 0.41  | 0.41  | 0.41  |      |
| chr1 | 160976071 | 161226270 | 7 | 8 | 8 | 8 | 8 | 8 | 2 | 2 | 0 | 1 | 2 | 2 | 7.83 | 0.41 | -2.04 | 0.41   | 0.41  | 0.41  | 0.41  | 0.41  |      |
| chr1 | 161226271 | 162136070 | 7 | 8 | 8 | 8 | 8 | 8 | 2 | 2 | 0 | 1 | 2 | 2 | 7.83 | 0.41 | -2.04 | 0.41   | 0.41  | 0.41  | 0.41  | 0.41  |      |
| chr1 | 162136071 | 162146070 | 7 | 8 | 8 | 8 | 8 | 8 | 2 | 2 | 0 | 1 | 2 | 2 | 7.83 | 0.41 | -2.04 | 0.41   | 0.41  | 0.41  | 0.41  | 0.41  |      |
| chr1 | 162146071 | 169215470 | 7 | 8 | 8 | 8 | 8 | 8 | 2 | 2 | 0 | 1 | 2 | 2 | 7.83 | 0.41 | -2.04 | 0.41   | 0.41  | 0.41  | 0.41  | 0.41  |      |
| chr1 | 169215471 | 169225470 | 7 | 8 | 8 | 8 | 8 | 8 | 2 | 2 | 0 | 1 | 2 | 2 | 7.83 | 0.41 | -2.04 | 0.41   | 0.41  | 0.41  | 0.41  | 0.41  |      |
| chr1 | 169225471 | 169265470 | 7 | 5 | 3 | 5 | 5 | 6 | 2 | 1 | 0 | 0 | 1 | 1 | 5.17 | 1.33 | 1.38  | -0.13  | -1.63 | -0.13 | -0.13 | 0.63  |      |
| chr1 | 169265471 | 169275470 | 7 | 5 | 3 | 5 | 5 | 6 | 2 | 1 | 0 | 0 | 1 | 1 | 5.17 | 1.33 | 1.38  | -0.13  | -1.63 | -0.13 | -0.13 | 0.63  |      |
| chr1 | 169275471 | 170066070 | 7 | 8 | 8 | 8 | 8 | 8 | 2 | 2 | 0 | 1 | 2 | 2 | 7.83 | 0.41 | -2.04 | 0.41   | 0.41  | 0.41  | 0.41  | 0.41  |      |
| chr1 | 170066071 | 170076070 | 7 | 8 | 8 | 8 | 8 | 8 | 2 | 2 | 0 | 1 | 2 | 2 | 7.83 | 0.41 | -2.04 | 0.41   | 0.41  | 0.41  | 0.41  | 0.41  |      |
| chr1 | 170076071 | 171036070 | 7 | 8 | 8 | 8 | 8 | 8 | 2 | 2 | 0 | 1 | 1 | 2 | 7.83 | 0.41 | -2.04 | 0.41   | 0.41  | 0.41  | 0.41  | 0.41  |      |
| chr1 | 171036071 | 171046070 | 7 | 8 | 8 | 8 | 8 | 8 | 2 | 2 | 0 | 1 | 1 | 2 | 7.83 | 0.41 | -2.04 | 0.41   | 0.41  | 0.41  | 0.41  | 0.41  |      |
| chr1 | 171046071 | 186672070 | 7 | 8 | 8 | 8 | 8 | 8 | 2 | 2 | 0 | 1 | 2 | 2 | 7.83 | 0.41 | -2.04 | 0.41   | 0.41  | 0.41  | 0.41  | 0.41  |      |
| chr1 | 186672071 | 186682070 | 7 | 8 | 8 | 8 | 8 | 8 | 2 | 2 | 0 | 1 | 2 | 2 | 7.83 | 0.41 | -2.04 | 0.41   | 0.41  | 0.41  | 0.41  | 0.41  |      |
| chr1 | 186682071 | 192413670 | 7 | 8 | 8 | 8 | 8 | 8 | 2 | 2 | 0 | 1 | 2 | 2 | 7.83 | 0.41 | -2.04 | 0.41   | 0.41  | 0.41  | 0.41  | 0.41  |      |
| chr1 | 192413671 | 192423670 | 7 | 8 | 8 | 8 | 8 | 8 | 2 | 2 | 0 | 1 | 2 | 2 | 7.83 | 0.41 | -2.04 | 0.41   | 0.41  | 0.41  | 0.41  | 0.41  |      |
| chr1 | 192423671 | 193683670 | 7 | 8 | 8 | 8 | 8 | 8 | 2 | 2 | 0 | 1 | 2 | 2 | 7.83 | 0.41 | -2.04 | 0.41   | 0.41  | 0.41  | 0.41  | 0.41  |      |
| chr1 | 193683671 | 193693670 | 7 | 8 | 8 | 8 | 8 | 8 | 2 | 2 | 0 | 1 | 2 | 2 | 7.83 | 0.41 | -2.04 | 0.41   | 0.41  | 0.41  | 0.41  | 0.41  |      |
| chr1 | 193693671 | 195933670 | 7 | 8 | 8 | 8 | 8 | 8 | 2 | 2 | 0 | 1 | 2 | 2 | 7.83 | 0.41 | -2.04 | 0.41   | 0.41  | 0.41  | 0.41  | 0.41  |      |
| chr1 | 195933671 | 195943670 | 7 | 8 | 8 | 8 | 8 | 8 | 2 | 2 | 0 | 1 | 2 | 2 | 7.83 | 0.41 | -2.04 | 0.41   | 0.41  | 0.41  | 0.41  | 0.41  |      |
| chr1 | 195943671 | 206326065 | 7 | 8 | 8 | 8 | 8 | 8 | 2 | 2 | 0 | 1 | 2 | 2 | 7.83 | 0.41 | -2.04 | 0.41   | 0.41  | 0.41  | 0.41  | 0.41  |      |
| chr1 | 206326066 | 206486260 | 7 | 8 | 8 | 8 | 8 | 8 | 2 | 2 | 0 | 1 | 2 | 2 | 7.83 | 0.41 | -2.04 | 0.41   | 0.41  | 0.41  | 0.41  | 0.41  |      |
| chr1 | 206486261 | 206536260 | 7 | 8 | 8 | 8 | 8 | 8 | 2 | 2 | 0 | 1 | 1 | 2 | 7.83 | 0.41 | -2.04 | 0.41   | 0.41  | 0.41  | 0.41  | 0.41  |      |
| chr1 | 206536261 | 206546260 | 7 | 8 | 8 | 8 | 8 | 8 | 2 | 2 | 0 | 1 | 1 | 2 | 7.83 | 0.41 | -2.04 | 0.41   | 0.41  | 0.41  | 0.41  | 0.41  |      |
| chr1 | 206546261 | 212087060 | 7 | 8 | 8 | 8 | 8 | 8 | 2 | 2 | 0 | 1 | 2 | 2 | 7.83 | 0.41 | -2.04 | 0.41   | 0.41  | 0.41  | 0.41  | 0.41  |      |
| chr1 | 212087061 | 212097060 | 7 | 8 | 8 | 8 | 8 | 8 | 2 | 2 | 0 | 1 | 2 | 2 | 7.83 | 0.41 | -2.04 | 0.41   | 0.41  | 0.41  | 0.41  | 0.41  |      |
| chr1 | 212097061 | 212627060 | 7 | 8 | 8 | 8 | 8 | 8 | 2 | 2 | 0 | 1 | 2 | 2 | 7.83 | 0.41 | -2.04 | 0.41   | 0.41  | 0.41  | 0.41  | 0.41  |      |
| chr1 | 212627061 | 212637060 | 7 | 8 | 8 | 8 | 8 | 8 | 2 | 2 | 0 | 1 | 2 | 2 | 7.83 | 0.41 | -2.04 | 0.41   | 0.41  | 0.41  | 0.41  | 0.41  |      |
| chr1 | 212637061 | 223717060 | 7 | 8 | 8 | 8 | 8 | 8 | 2 | 2 | 0 | 1 | 2 | 2 | 7.83 | 0.41 | -2.04 | 0.41   | 0.41  | 0.41  | 0.41  | 0.41  |      |
| chr1 | 223717061 | 223727060 | 7 | 8 | 8 | 8 | 8 | 8 | 2 | 2 | 0 | 1 | 2 | 2 | 7.83 | 0.41 | -2.04 | 0.41   | 0.41  | 0.41  | 0.41  | 0.41  |      |
| chr1 | 223727061 | 223817255 | 7 | 8 | 8 | 8 | 8 | 8 | 2 | 2 | 0 | 1 | 2 | 2 | 7.83 | 0.41 | -2.04 | 0.41   | 0.41  | 0.41  | 0.41  | 0.41  |      |
| chr1 | 223817256 | 223827255 | 7 | 8 | 8 | 8 | 8 | 8 | 2 | 2 | 0 | 1 | 2 | 2 | 7.83 | 0.41 | -2.04 | 0.41   | 0.41  | 0.41  | 0.41  | 0.41  |      |
| chr1 | 223827256 | 228727255 | 7 | 8 | 8 | 8 | 8 | 8 | 2 | 2 | 0 | 1 | 2 | 2 | 7.83 | 0.41 | -2.04 | 0.41   | 0.41  | 0.41  | 0.41  | 0.41  |      |
| chr1 | 228727256 | 228737255 | 7 | 8 | 8 | 8 | 8 | 8 | 2 | 2 | 0 | 1 | 2 | 2 | 7.83 | 0.41 | -2.04 | 0.41   | 0.41  | 0.41  | 0.41  | 0.41  |      |
| chr1 | 228737256 | 228777255 | 7 | 7 | 8 | 8 | 8 | 8 | 2 | 2 | 0 | 1 | 2 | 2 | 7.67 | 0.52 | -1.29 | -1.29  | 0.65  | 0.65  | 0.65  | 0.65  |      |
| chr1 | 228777256 | 228787255 | 7 | 7 | 8 | 8 | 8 | 8 | 2 | 2 | 0 | 1 | 2 | 2 | 7.67 | 0.52 | -1.29 | -1.29  | 0.65  | 0.65  | 0.65  | 0.65  |      |
| chr1 | 228787256 | 234489455 | 7 | 8 | 8 | 8 | 8 | 8 | 2 | 2 | 0 | 1 | 2 | 2 | 7.83 | 0.41 | -2.04 | 0.41   | 0.41  | 0.41  | 0.41  | 0.41  |      |
| chr1 | 234489456 | 234499455 | 7 | 8 | 8 | 8 | 8 | 8 | 2 | 2 | 0 | 1 | 2 | 2 | 7.83 | 0.41 | -2.04 | 0.41   | 0.41  | 0.41  | 0.41  | 0.41  |      |
| chr1 | 234499456 | 234900855 | 7 | 8 | 8 | 8 | 8 | 8 | 2 | 2 | 0 | 1 | 2 | 2 | 7.83 | 0.41 | -2.04 | 0.41   | 0.41  | 0.41  | 0.41  | 0.41  |      |
| chr1 | 234900856 | 234910855 | 7 | 8 | 8 | 8 | 8 | 8 | 2 | 2 | 0 | 1 | 2 | 2 | 7.83 | 0.41 | -2.04 | 0.41   | 0.41  | 0.41  | 0.41  | 0.41  |      |
| chr1 | 234910856 | 234950855 | 7 | 7 | 8 | 8 | 8 | 5 | 2 | 2 | 0 | 1 | 4 | 2 | 7.17 | 1.17 | -0.14 | -0.14  | 0.71  | 0.71  | 0.71  | -1.85 |      |
| chr1 | 234950856 | 234960855 | 7 | 7 | 8 | 8 | 8 | 5 | 2 | 2 | 0 | 1 | 4 | 2 | 7.17 | 1.17 | -0.14 | -0.14  | 0.71  | 0.71  | 0.71  | -1.85 |      |
| chr1 | 234960856 | 237080050 | 7 | 8 | 8 | 8 | 8 | 8 | 2 | 2 | 0 | 1 | 2 | 2 | 7.83 | 0.41 | -2.04 | 0.41   | 0.41  | 0.41  | 0.41  | 0.41  |      |
| chr1 | 237080051 | 237090050 | 7 | 8 | 8 | 8 | 8 | 8 | 2 | 2 | 0 | 1 | 2 | 2 | 7.83 | 0.41 | -2.04 | 0.41   | 0.41  | 0.41  | 0.41  | 0.41  |      |
| chr1 | 237090051 | 241640050 | 7 | 8 | 8 | 8 | 8 | 8 | 2 | 2 | 0 | 1 | 2 | 2 | 7.83 | 0.41 | -2.04 | 0.41   | 0.41  | 0.41  | 0.41  | 0.41  |      |
| chr1 | 241640051 | 241650050 | 7 | 8 | 8 | 8 | 8 | 8 | 2 | 2 | 0 | 1 | 2 | 2 | 7.83 | 0.41 | -2.04 | 0.41</ |       |       |       |       |      |

|      |          |          |   |   |   |   |   |   |   |   |   |   |   |   |      |      |       |       |      |      |      |      |
|------|----------|----------|---|---|---|---|---|---|---|---|---|---|---|---|------|------|-------|-------|------|------|------|------|
| chr2 | 3189801  | 3199800  | 4 | 5 | 5 | 5 | 5 | 5 | 2 | 2 | 2 | 2 | 2 | 2 | 4.83 | 0.41 | -2.04 | 0.41  | 0.41 | 0.41 | 0.41 | 0.41 |
| chr2 | 3199801  | 3309800  | 4 | 5 | 5 | 5 | 5 | 5 | 2 | 2 | 2 | 2 | 2 | 2 | 2    | 4.83 | 0.41  | -2.04 | 0.41 | 0.41 | 0.41 | 0.41 |
| chr2 | 3309801  | 3319800  | 4 | 5 | 5 | 5 | 5 | 5 | 2 | 2 | 2 | 2 | 2 | 2 | 2    | 4.83 | 0.41  | -2.04 | 0.41 | 0.41 | 0.41 | 0.41 |
| chr2 | 3319801  | 3619995  | 4 | 5 | 5 | 5 | 5 | 5 | 2 | 2 | 2 | 2 | 2 | 2 | 2    | 4.83 | 0.41  | -2.04 | 0.41 | 0.41 | 0.41 | 0.41 |
| chr2 | 3619996  | 3629995  | 4 | 5 | 5 | 5 | 5 | 5 | 2 | 2 | 2 | 2 | 2 | 2 | 2    | 4.83 | 0.41  | -2.04 | 0.41 | 0.41 | 0.41 | 0.41 |
| chr2 | 3629996  | 3639995  | 4 | 5 | 5 | 5 | 5 | 5 | 2 | 2 | 2 | 2 | 2 | 2 | 2    | 4.83 | 0.41  | -2.04 | 0.41 | 0.41 | 0.41 | 0.41 |
| chr2 | 3639996  | 3679995  | 4 | 5 | 5 | 5 | 5 | 5 | 2 | 2 | 2 | 2 | 2 | 2 | 2    | 4.83 | 0.41  | -2.04 | 0.41 | 0.41 | 0.41 | 0.41 |
| chr2 | 3679996  | 3689995  | 4 | 5 | 5 | 5 | 5 | 5 | 2 | 2 | 2 | 2 | 2 | 2 | 2    | 4.83 | 0.41  | -2.04 | 0.41 | 0.41 | 0.41 | 0.41 |
| chr2 | 3689996  | 6870190  | 4 | 5 | 5 | 5 | 5 | 5 | 2 | 2 | 2 | 2 | 2 | 2 | 2    | 4.83 | 0.41  | -2.04 | 0.41 | 0.41 | 0.41 | 0.41 |
| chr2 | 6870191  | 6880190  | 4 | 5 | 5 | 5 | 5 | 5 | 2 | 2 | 2 | 2 | 2 | 2 | 2    | 4.83 | 0.41  | -2.04 | 0.41 | 0.41 | 0.41 | 0.41 |
| chr2 | 6880191  | 11820190 | 4 | 5 | 5 | 5 | 5 | 5 | 2 | 2 | 2 | 2 | 2 | 2 | 2    | 4.83 | 0.41  | -2.04 | 0.41 | 0.41 | 0.41 | 0.41 |
| chr2 | 11820191 | 11830190 | 4 | 5 | 5 | 5 | 5 | 5 | 2 | 2 | 2 | 2 | 2 | 2 | 2    | 4.83 | 0.41  | -2.04 | 0.41 | 0.41 | 0.41 | 0.41 |
| chr2 | 11830191 | 13070190 | 4 | 4 | 4 | 4 | 4 | 4 | 2 | 2 | 2 | 2 | 2 | 2 | 2    | 4    | 0     | 0     | 0    | 0    | 0    | 0    |
| chr2 | 13070191 | 13080190 | 4 | 4 | 4 | 4 | 4 | 4 | 2 | 2 | 2 | 2 | 2 | 2 | 2    | 4    | 0     | 0     | 0    | 0    | 0    | 0    |
| chr2 | 13080191 | 15350190 | 4 | 5 | 5 | 5 | 5 | 5 | 2 | 2 | 2 | 2 | 2 | 2 | 2    | 4.83 | 0.41  | -2.04 | 0.41 | 0.41 | 0.41 | 0.41 |
| chr2 | 15350191 | 15360190 | 4 | 5 | 5 | 5 | 5 | 5 | 2 | 2 | 2 | 2 | 2 | 2 | 2    | 4.83 | 0.41  | -2.04 | 0.41 | 0.41 | 0.41 | 0.41 |
| chr2 | 15360191 | 27195580 | 4 | 5 | 5 | 5 | 5 | 5 | 2 | 2 | 2 | 2 | 2 | 2 | 2    | 4.83 | 0.41  | -2.04 | 0.41 | 0.41 | 0.41 | 0.41 |
| chr2 | 27195581 | 27205580 | 4 | 5 | 5 | 5 | 5 | 5 | 2 | 2 | 2 | 2 | 2 | 2 | 2    | 4.83 | 0.41  | -2.04 | 0.41 | 0.41 | 0.41 | 0.41 |
| chr2 | 27205581 | 27915580 | 4 | 5 | 5 | 5 | 5 | 5 | 2 | 2 | 2 | 2 | 2 | 2 | 2    | 4.83 | 0.41  | -2.04 | 0.41 | 0.41 | 0.41 | 0.41 |
| chr2 | 27915581 | 27925580 | 4 | 5 | 5 | 5 | 5 | 5 | 2 | 2 | 2 | 2 | 2 | 2 | 2    | 4.83 | 0.41  | -2.04 | 0.41 | 0.41 | 0.41 | 0.41 |
| chr2 | 27925581 | 29265580 | 4 | 5 | 5 | 5 | 5 | 5 | 2 | 2 | 2 | 2 | 2 | 2 | 2    | 4.83 | 0.41  | -2.04 | 0.41 | 0.41 | 0.41 | 0.41 |
| chr2 | 29265581 | 29275580 | 4 | 5 | 5 | 5 | 5 | 5 | 2 | 2 | 2 | 2 | 2 | 2 | 2    | 4.83 | 0.41  | -2.04 | 0.41 | 0.41 | 0.41 | 0.41 |
| chr2 | 29275581 | 29515780 | 4 | 5 | 5 | 5 | 5 | 5 | 2 | 2 | 2 | 2 | 2 | 2 | 2    | 4.83 | 0.41  | -2.04 | 0.41 | 0.41 | 0.41 | 0.41 |
| chr2 | 29515781 | 29535980 | 4 | 5 | 5 | 5 |   |   |   |   |   |   |   |   |      |      |       |       |      |      |      |      |

[illegible]

|      |          |           |   |   |   |   |   |   |   |   |   |   |   |   |      |      |       |       |       |       |       |       |      |
|------|----------|-----------|---|---|---|---|---|---|---|---|---|---|---|---|------|------|-------|-------|-------|-------|-------|-------|------|
| chr3 | 17858001 | 17868000  | 3 | 4 | 4 | 4 | 4 | 4 | 1 | 2 | 2 | 2 | 2 | 2 | 3.83 | 0.41 | -2.04 | 0.41  | 0.41  | 0.41  | 0.41  | 0.41  |      |
| chr3 | 17868001 | 18768000  | 3 | 4 | 4 | 4 | 4 | 4 | 1 | 2 | 2 | 2 | 2 | 2 | 3.83 | 0.41 | -2.04 | 0.41  | 0.41  | 0.41  | 0.41  | 0.41  |      |
| chr3 | 18768001 | 18778000  | 3 | 4 | 4 | 4 | 4 | 4 | 1 | 2 | 2 | 2 | 2 | 2 | 3.83 | 0.41 | -2.04 | 0.41  | 0.41  | 0.41  | 0.41  | 0.41  |      |
| chr3 | 18778001 | 18938000  | 3 | 4 | 4 | 4 | 4 | 4 | 1 | 2 | 2 | 2 | 2 | 2 | 3.83 | 0.41 | -2.04 | 0.41  | 0.41  | 0.41  | 0.41  | 0.41  |      |
| chr3 | 18938001 | 18948000  | 3 | 4 | 4 | 4 | 4 | 4 | 1 | 2 | 2 | 2 | 2 | 2 | 3.83 | 0.41 | -2.04 | 0.41  | 0.41  | 0.41  | 0.41  | 0.41  |      |
| chr3 | 18948001 | 75674400  | 3 | 4 | 4 | 4 | 4 | 4 | 1 | 2 | 2 | 2 | 2 | 2 | 3.83 | 0.41 | -2.04 | 0.41  | 0.41  | 0.41  | 0.41  | 0.41  |      |
| chr3 | 75674401 | 75684400  | 3 | 4 | 4 | 4 | 4 | 4 | 1 | 2 | 2 | 2 | 2 | 2 | 3.83 | 0.41 | -2.04 | 0.41  | 0.41  | 0.41  | 0.41  | 0.41  |      |
| chr3 | 75684401 | 75784400  | 4 | 5 | 5 | 5 | 5 | 5 | 2 | 2 | 0 | 0 | 1 | 1 | 4.83 | 0.41 | -2.04 | 0.41  | 0.41  | 0.41  | 0.41  | 0.41  |      |
| chr3 | 75784401 | 75794400  | 4 | 5 | 4 | 5 | 5 | 5 | 2 | 2 | 2 | 0 | 1 | 1 | 4.67 | 0.52 | -1.29 | 0.65  | -1.29 | 0.65  | 0.65  | 0.65  |      |
| chr3 | 75794401 | 75815400  | 4 | 4 | 4 | 5 | 4 | 5 | 2 | 2 | 2 | 0 | 2 | 1 | 4.33 | 0.52 | -0.65 | -0.65 | -0.65 | 1.29  | -0.65 | 1.29  |      |
| chr3 | 75815401 | 75825400  | 4 | 4 | 4 | 5 | 4 | 5 | 2 | 2 | 2 | 2 | 0 | 2 | 1    | 4.33 | 0.52  | -0.65 | -0.65 | -0.65 | 1.29  | -0.65 | 1.29 |
| chr3 | 75825401 | 75846200  | 4 | 4 | 4 | 4 | 4 | 4 | 2 | 2 | 2 | 2 | 2 | 2 | 4    | 0    | 0     | 0     | 0     | 0     | 0     | 0     |      |
| chr3 | 75846201 | 75856200  | 4 | 4 | 4 | 4 | 4 | 4 | 2 | 2 | 2 | 2 | 2 | 2 | 4    | 0    | 0     | 0     | 0     | 0     | 0     | 0     |      |
| chr3 | 75856201 | 86386400  | 3 | 4 | 4 | 4 | 4 | 4 | 1 | 2 | 2 | 2 | 2 | 2 | 3.83 | 0.41 | -2.04 | 0.41  | 0.41  | 0.41  | 0.41  | 0.41  |      |
| chr3 | 86386401 | 86396400  | 3 | 4 | 4 | 4 | 4 | 4 | 1 | 2 | 2 | 2 | 2 | 2 | 3.83 | 0.41 | -2.04 | 0.41  | 0.41  | 0.41  | 0.41  | 0.41  |      |
| chr3 | 86396401 | 86436400  | 3 | 4 | 4 | 4 | 3 | 3 | 1 | 2 | 2 | 2 | 1 | 1 | 3.5  | 0.55 | -0.91 | 0.91  | 0.91  | 0.91  | -0.91 | -0.91 |      |
| chr3 | 86436401 | 86446400  | 3 | 4 | 4 | 4 | 3 | 3 | 1 | 2 | 2 | 2 | 1 | 1 | 3.5  | 0.55 | -0.91 | 0.91  | 0.91  | 0.91  | -0.91 | -0.91 |      |
| chr3 | 86446401 | 87886400  | 3 | 4 | 4 | 4 | 4 | 4 | 1 | 2 | 2 | 2 | 2 | 2 | 3.83 | 0.41 | -2.04 | 0.41  | 0.41  | 0.41  | 0.41  | 0.41  |      |
| chr3 | 87886401 | 93909995  | 3 | 4 | 4 | 4 | 4 | 4 | 1 | 2 | 2 | 2 | 2 | 2 | 3.83 | 0.41 | -2.04 | 0.41  | 0.41  | 0.41  | 0.41  | 0.41  |      |
| chr3 | 93909996 | 97899995  | 3 | 4 | 4 | 4 | 4 | 4 | 1 | 2 | 2 | 2 | 2 | 2 | 3.83 | 0.41 | -2.04 | 0.41  | 0.41  | 0.41  | 0.41  | 0.41  |      |
| chr3 | 97899996 | 98039995  | 3 | 4 | 4 | 3 | 4 | 4 | 1 | 2 | 2 | 1 | 2 | 2 | 3.67 | 0.52 | -1.29 | 0.65  | 0.65  | -1.29 | 0.65  | 0.65  |      |
| chr3 | 98039996 | 98049995  | 3 | 4 | 4 | 3 | 4 | 4 | 1 | 2 | 2 | 1 | 2 | 2 | 3.67 | 0.52 | -1.29 | 0.65  | 0.65  | -1.29 | 0.65  | 0.65  |      |
| chr3 | 98049996 | 169638995 | 3 | 4 | 4 | 4 | 4 | 4 | 1 | 2 | 2 | 2 | 2 | 2 | 3.83 | 0.41 | -2.04 | 0.41  | 0.41  | 0     |       |       |      |

|      |           |           |   |   |   |   |   |   |   |   |   |   |   |   |      |      |       |       |       |       |       |       |       |       |
|------|-----------|-----------|---|---|---|---|---|---|---|---|---|---|---|---|------|------|-------|-------|-------|-------|-------|-------|-------|-------|
| chr4 | 47439271  | 48188470  | 4 | 4 | 4 | 4 | 4 | 4 | 2 | 2 | 2 | 2 | 2 | 2 | 4    | 0    | 0     | 0     | 0     | 0     | 0     | 0     | 0     | 0     |
| chr4 | 48188471  | 52709860  | 4 | 4 | 4 | 4 | 4 | 4 | 2 | 2 | 2 | 2 | 2 | 2 | 4    | 0    | 0     | 0     | 0     | 0     | 0     | 0     | 0     | 0     |
| chr4 | 52709861  | 69170055  | 4 | 4 | 4 | 4 | 4 | 4 | 2 | 2 | 2 | 2 | 2 | 2 | 4    | 0    | 0     | 0     | 0     | 0     | 0     | 0     | 0     | 0     |
| chr4 | 69170056  | 69240055  | 4 | 4 | 4 | 5 | 4 | 4 | 2 | 2 | 2 | 2 | 2 | 2 | 4.17 | 0.41 | -0.41 | -0.41 | -0.41 | 2.04  | -0.41 | -0.41 | -0.41 | -0.41 |
| chr4 | 69240056  | 69250055  | 4 | 4 | 4 | 5 | 4 | 4 | 2 | 2 | 2 | 2 | 2 | 2 | 4.17 | 0.41 | -0.41 | -0.41 | -0.41 | 2.04  | -0.41 | -0.41 | -0.41 | -0.41 |
| chr4 | 69250056  | 73840055  | 4 | 4 | 4 | 4 | 4 | 4 | 2 | 2 | 2 | 2 | 2 | 2 | 4    | 0    | 0     | 0     | 0     | 0     | 0     | 0     | 0     | 0     |
| chr4 | 73840056  | 73850055  | 4 | 4 | 4 | 4 | 4 | 4 | 2 | 2 | 2 | 2 | 2 | 2 | 4    | 0    | 0     | 0     | 0     | 0     | 0     | 0     | 0     | 0     |
| chr4 | 73850056  | 74240055  | 4 | 5 | 5 | 5 | 5 | 5 | 2 | 2 | 2 | 2 | 2 | 2 | 4.83 | 0.41 | -2.04 | 0.41  | 0.41  | 0.41  | 0.41  | 0.41  | 0.41  | 0.41  |
| chr4 | 74240056  | 74250055  | 4 | 5 | 5 | 5 | 5 | 5 | 2 | 2 | 2 | 2 | 2 | 2 | 4.83 | 0.41 | -2.04 | 0.41  | 0.41  | 0.41  | 0.41  | 0.41  | 0.41  | 0.41  |
| chr4 | 74250056  | 74260055  | 4 | 5 | 5 | 5 | 5 | 4 | 2 | 2 | 2 | 2 | 2 | 2 | 4.67 | 0.52 | -1.29 | 0.65  | 0.65  | 0.65  | 0.65  | 0.65  | -1.29 | -1.29 |
| chr4 | 74260056  | 74270055  | 4 | 4 | 4 | 5 | 4 | 4 | 2 | 2 | 2 | 2 | 2 | 2 | 4.17 | 0.41 | -0.41 | -0.41 | -0.41 | 2.04  | -0.41 | -0.41 | -0.41 | -0.41 |
| chr4 | 74270056  | 80025350  | 4 | 4 | 4 | 4 | 4 | 4 | 2 | 2 | 2 | 2 | 2 | 2 | 4    | 0    | 0     | 0     | 0     | 0     | 0     | 0     | 0     | 0     |
| chr4 | 80025351  | 80035350  | 4 | 4 | 4 | 4 | 4 | 4 | 2 | 2 | 2 | 2 | 2 | 2 | 4    | 0    | 0     | 0     | 0     | 0     | 0     | 0     | 0     | 0     |
| chr4 | 80035351  | 80715350  | 4 | 4 | 4 | 4 | 4 | 4 | 2 | 2 | 2 | 2 | 2 | 2 | 4    | 0    | 0     | 0     | 0     | 0     | 0     | 0     | 0     | 0     |
| chr4 | 80715351  | 80725350  | 4 | 4 | 4 | 4 | 4 | 4 | 2 | 2 | 2 | 2 | 2 | 2 | 4    | 0    | 0     | 0     | 0     | 0     | 0     | 0     | 0     | 0     |
| chr4 | 80725351  | 81085350  | 4 | 4 | 4 | 4 | 4 | 4 | 2 | 2 | 2 | 2 | 2 | 2 | 4    | 0    | 0     | 0     | 0     | 0     | 0     | 0     | 0     | 0     |
| chr4 | 81085351  | 81095350  | 4 | 4 | 4 | 4 | 4 | 4 | 2 | 2 | 2 | 2 | 2 | 2 | 4    | 0    | 0     | 0     | 0     | 0     | 0     | 0     | 0     | 0     |
| chr4 | 81095351  | 82315350  | 4 | 4 | 4 | 4 | 4 | 4 | 2 | 2 | 2 | 2 | 2 | 2 | 4    | 0    | 0     | 0     | 0     | 0     | 0     | 0     | 0     | 0     |
| chr4 | 82315351  | 82325350  | 4 | 4 | 4 | 4 | 4 | 4 | 2 | 2 | 2 | 2 | 2 | 2 | 4    | 0    | 0     | 0     | 0     | 0     | 0     | 0     | 0     | 0     |
| chr4 | 82325351  | 82545350  | 4 | 4 | 4 | 4 | 4 | 4 | 2 | 2 | 2 | 2 | 2 | 2 | 4    | 0    | 0     | 0     | 0     | 0     | 0     | 0     | 0     | 0     |
| chr4 | 82545351  | 82555350  | 4 | 4 | 4 | 4 | 4 | 4 | 2 | 2 | 2 | 2 | 2 | 2 | 4    | 0    | 0     | 0     | 0     | 0     | 0     | 0     | 0     | 0     |
| chr4 | 82555351  | 87795550  | 4 | 4 | 4 | 4 | 4 | 4 | 2 | 2 | 2 | 2 | 2 | 2 | 4    | 0    | 0     | 0     | 0     | 0     | 0     | 0     | 0     | 0     |
| chr4 | 87795551  | 88045550  | 4 | 4 | 4 | 4 | 4 | 4 | 2 | 2 | 2 | 2 | 2 | 2 | 4    | 0    | 0     | 0     | 0     | 0     | 0     | 0     | 0     | 0     |
| chr4 | 88045551  | 88055550  | 4 | 4 | 4 | 4 | 4 | 4 | 2 | 2 | 2 | 2 | 2 | 2 | 4    | 0    | 0     | 0     | 0     | 0     | 0     | 0     | 0     | 0     |
| chr4 | 88055551  | 95985150  | 4 | 4 | 4 | 4 | 4 | 4 | 2 | 2 | 2 | 2 | 2 | 2 | 4    | 0    | 0     | 0     | 0     | 0     | 0     | 0     | 0     | 0     |
| chr4 | 95985151  | 95995150  | 4 | 4 | 4 | 4 | 4 | 4 | 2 | 2 | 2 | 2 | 2 | 2 | 4    | 0    | 0     | 0     | 0     | 0     | 0     | 0     | 0     | 0     |
| chr4 | 95995151  | 106615750 | 2 | 2 | 2 | 2 | 2 | 2 | 0 | 0 | 0 | 0 | 0 | 0 | 2    | 0    | 0     | 0     | 0     | 0     | 0     | 0     | 0     | 0     |
| chr4 | 106615751 | 106625750 | 2 | 2 | 2 | 2 | 2 | 2 | 0 | 0 | 0 | 0 | 0 | 0 | 2    | 0    | 0     | 0     | 0     | 0     | 0     | 0     | 0     | 0     |
| chr4 | 106625751 | 106695750 | 0 | 0 | 0 | 0 | 0 | 0 | 0 | 0 | 0 | 0 | 0 | 0 | 0    | 0    | 0     | 0     | 0     | 0     | 0     | 0     | 0     | 0     |
| chr4 | 106695751 | 106705750 | 0 | 0 | 0 | 0 | 0 | 0 | 0 | 0 | 0 | 0 | 0 | 0 | 0    | 0    | 0     | 0     | 0     | 0     | 0     | 0     | 0     | 0     |
| chr4 | 106705751 | 114066950 | 2 | 2 | 2 | 2 | 2 | 2 | 0 | 0 | 0 | 0 | 0 | 0 | 2    | 0    | 0     | 0     | 0     | 0     | 0     | 0     | 0     | 0     |
| chr4 | 114066951 | 114076950 | 2 | 2 | 2 | 2 | 2 | 2 | 0 | 0 | 0 | 0 | 0 | 0 | 2    | 0    | 0     | 0     | 0     | 0     | 0     | 0     | 0     | 0     |
| chr4 | 114076951 | 114726950 | 2 | 2 | 2 | 2 | 2 | 2 | 0 | 0 | 0 | 0 | 0 | 0 | 2    | 0    | 0     | 0     | 0     | 0     | 0     | 0     | 0     | 0     |
| chr4 | 114726951 | 114736950 | 2 | 2 | 2 | 2 | 2 | 2 | 0 | 0 | 0 | 0 | 0 | 0 | 2    | 0    | 0     | 0     | 0     | 0     | 0     | 0     | 0     | 0     |
| chr4 | 114736951 | 119456950 | 2 | 2 | 2 | 2 | 2 | 2 | 0 | 0 | 0 | 0 | 0 | 0 | 2    | 0    | 0     | 0     | 0     | 0     | 0     | 0     | 0     | 0     |
| chr4 | 119456951 | 119586950 | 2 | 2 | 2 | 2 | 2 | 2 | 0 | 0 | 0 | 0 | 0 | 0 | 1    | 2    | 0     | 0     | 0     | 0     | 0     | 0     | 0     | 0     |
| chr4 | 119586951 | 119596950 | 2 | 2 | 2 | 2 | 2 | 2 | 0 | 0 | 0 | 0 | 0 | 0 | 1    | 2    | 0     | 0     | 0     | 0     | 0     | 0     | 0     | 0     |
| chr4 | 119596951 | 132637150 | 2 | 2 | 2 | 2 | 2 | 2 | 0 | 0 | 0 | 0 | 0 | 0 | 2    | 0    | 0     | 0     | 0     | 0     | 0     | 0     | 0     | 0     |
| chr4 | 132637151 | 132647150 | 2 | 2 | 2 | 2 | 2 | 2 | 0 | 0 | 0 | 0 | 0 | 0 | 2    | 0    | 0     | 0     | 0     | 0     | 0     | 0     | 0     | 0     |
| chr4 | 132647151 | 132657350 | 2 | 1 | 2 | 0 | 1 | 1 | 0 | 0 | 0 | 0 | 0 | 0 | 1.17 | 0.75 | 1.11  | -0.22 | 1.11  | -1.55 | -0.22 | -0.22 | -0.22 | -0.22 |
| chr4 | 132657351 | 132687150 | 1 | 1 | 1 | 0 | 1 | 1 | 0 | 0 | 0 | 0 | 0 | 0 | 0.83 | 0.41 | 0.41  | 0.41  | 0.41  | -2.04 | 0.41  | 0.41  | 0.41  | 0.41  |
| chr4 | 132687151 | 132697150 | 1 | 1 | 1 | 0 | 1 | 1 | 0 | 0 | 0 | 0 | 0 | 0 | 0.83 | 0.41 | 0.41  | 0.41  | 0.41  | -2.04 | 0.41  | 0.41  | 0.41  | 0.41  |
| chr4 | 132697151 | 132707350 | 1 | 2 | 1 | 2 | 2 | 2 | 0 | 0 | 0 | 0 | 0 | 0 | 1.67 | 0.52 | -1.29 | 0.65  | -1.29 | 0.65  | 0.65  | 0.65  | 0.65  | 0.65  |
| chr4 | 132707351 | 165981550 | 2 | 2 | 2 | 2 | 2 | 2 | 0 | 0 | 0 | 0 | 0 | 0 | 2    | 0    | 0     | 0     | 0     | 0     | 0     | 0     | 0     | 0     |
| chr4 | 165981551 | 165991550 | 2 | 2 | 2 | 2 | 2 | 2 | 0 | 0 | 0 | 0 | 0 | 0 | 2    | 0    | 0     | 0     | 0     | 0     | 0     | 0     | 0     | 0     |
| chr4 | 165991551 | 166203350 | 2 | 2 | 2 | 3 | 2 | 2 | 0 | 0 | 0 | 0 | 0 | 0 | 2.17 | 0.41 | -0.41 | -0.41 | -0.41 | 2.04  | -0.41 | -0.41 | -0.41 | -0.41 |
| chr4 | 166203351 | 166283550 | 2 | 2 | 2 | 2 | 2 | 2 | 0 | 0 | 0 | 0 | 0 | 0 | 2    | 0    | 0     | 0     | 0     | 0     | 0     | 0     | 0     | 0     |
| chr4 | 166283551 | 166293550 | 2 | 2 | 2 | 2 | 2 | 2 | 0 | 0 | 0 | 0 | 0 | 0 | 2    | 0    | 0     | 0     | 0     | 0     | 0     | 0     | 0     | 0     |
| chr4 | 166293551 | 166362950 | 2 | 2 | 2 | 2 | 2 | 2 | 0 | 0 | 0 | 0 | 0 | 0 | 2    | 0    | 0     | 0     | 0     | 0     | 0     | 0     | 0     | 0     |
| chr4 | 166362951 | 166372950 | 2 | 2 | 2 | 2 | 2 | 2 | 0 | 0 | 0 | 0 | 0 | 0 | 2    | 0    | 0     | 0     | 0     | 0     | 0     | 0     | 0     | 0     |
| chr4 | 166372951 | 179425950 | 2 | 2 | 2 | 2 | 2 | 2 | 0 | 0 | 0 | 0 | 0 | 0 | 2    | 0    | 0     | 0     | 0     | 0     | 0     | 0     | 0     | 0     |
| chr4 | 179425951 | 179436350 | 2 | 1 | 2 | 2 | 2 | 2 | 0 | 0 | 0 | 0 | 0 | 0 | 1.83 | 0.41 | 0.41  | -2.04 | 0.41  | 0.41  | 0.41  | 0.41  | 0.41  | 0.41  |
| chr4 | 179436351 | 182156350 | 2 | 1 | 1 | 2 | 1 | 2 | 0 | 0 | 0 | 0 | 0 | 0 | 1.5  | 0.55 | 0.91  | -0.91 | -0.91 | 0.91  | -0.91 | 0.91  | 0.91  | 0.91  |
| chr4 | 182156351 | 182166350 | 2 | 1 | 1 | 2 | 1 | 2 | 0 | 0 | 0 | 0 | 0 | 0 | 1.5  | 0.55 | 0.91  | -0.91 | -0.91 | 0.91  | -0.91 | 0.91  | 0.91  | 0.91  |
| chr4 | 182166351 | 182176750 | 2 | 2 | 1 | 2 | 2 | 2 | 0 | 0 | 0 | 0 | 0 | 0 | 1.83 | 0.41 | 0.41  | 0.41  | -2.04 | 0.41  | 0.41  | 0.41  | 0.41  | 0.41  |
| chr4 | 182176751 | 183626950 | 2 | 2 | 2 | 2 | 2 | 2 | 0 | 0 | 0 | 0 | 0 | 0 | 2    | 0    | 0     | 0     | 0     | 0     | 0     | 0     | 0     | 0     |
| chr4 | 183626951 | 183636950 | 2 | 2 | 2 | 2 | 2 | 2 | 0 | 0 | 0 | 0 | 0 | 0 | 2    | 0    | 0     | 0     | 0     | 0     | 0     | 0     | 0     | 0     |
| chr4 | 183636951 | 187799150 | 2 | 2 | 2 | 2 | 2 | 2 | 0 | 0 | 0 | 0 | 0 | 0 | 2    | 0    | 0     | 0     | 0     | 0     | 0     | 0     | 0     | 0     |
| chr4 | 187799151 | 187809150 | 2 | 2 | 2 | 2 | 2 | 2 | 0 | 0 | 0 | 0 | 0 | 0 | 2    | 0    | 0     | 0     | 0     | 0     | 0     | 0     | 0     | 0     |
| chr4 | 187809151 | 190530150 | 2 | 2 | 2 | 2 | 2 | 2 | 0 | 0 | 0 | 0 | 0 | 0 | 2    | 0    | 0     | 0     | 0     | 0     | 0     | 0     | 0     | 0     |
| chr4 | 190530151 | 190540150 | 2 | 2 | 2 | 2 | 2 | 2 | 0 | 0 | 0 | 0 | 0 | 0 | 2    | 0    | 0     | 0     | 0     | 0     | 0     | 0     | 0     | 0     |
| chr4 | 190540151 | 190679150 | 3 | 4 | 4 | 3 | 4 | 4 | 1 | 2 | 0 | 0 | 1 | 1 | 3.67 | 0.52 | -1.29 | 0.65  | 0.65  | -1.29 | 0.65  | 0.65  | 0.65  | 0.65  |
| chr4 | 190679151 | 190689150 | 3 | 4 | 4 | 3 | 4 | 4 | 1 | 2 | 0 | 0 | 1 | 1 | 3.67 | 0.52 | -1.29 | 0.65  | 0.65  | -1.29 | 0.65  | 0.65  | 0.65  | 0.65  |
| chr4 | 190689151 | 190929150 | 2 | 2 | 2 | 2 | 2 | 2 | 1 | 1 | 0 | 1 | 1 | 1 | 2    | 0    | 0     | 0     | 0     | 0     | 0     | 0     | 0     | 0     |
| chr4 | 190929151 | 190939150 | 2 | 2 | 2 | 2 | 2 | 2 | 1 | 1 | 0 | 1 | 1 | 1 | 2    | 0    | 0     | 0     | 0     | 0     | 0     | 0     | 0     | 0     |
| chr4 | 190939151 | 190949550 | 2 | 4 | 2 | 2 | 3 | 3 | 1 | 2 | 0 | 1 | 1 | 1 | 2.67 | 0.82 | -0.82 | 1.63  | -0.82 | -0.82 | 0.41  | 0.41  | 0.41  | 0.41  |
| chr4 | 190949551 | 190959550 | 2 | 4 | 2 | 4 | 3 | 3 | 1 | 2 | 0 | 1 | 1 | 1 | 3    | 0.89 | -1.12 | 1.12  | -1.12 | 1.12  | 0     | 0     | 0     | 0     |
| chr4 | 190959551 | 191029150 | 2 | 4 | 3 | 4 | 3 | 3 | 1 | 2 | 1 | 1 | 1 | 1 | 3.17 | 0.75 | -1.55 | 1.11  | -0.22 | 1.11  | -0.22 | -0.22 | -0.22 | -0.22 |
| chr5 | 19801     | 759800    | 4 | 5 | 5 | 4 | 5 | 4 | 2 | 2 | 2 | 1 | 2 | 1 | 4.5  | 0.55 | -0.91 |       |       |       |       |       |       |       |



|      |           |           |   |     |   |   |   |   |   |   |   |   |   |   |      |      |       |       |       |       |      |       |
|------|-----------|-----------|---|-----|---|---|---|---|---|---|---|---|---|---|------|------|-------|-------|-------|-------|------|-------|
| chr5 | 176646576 | 176856575 | 4 | 5   | 5 | 5 | 6 | 5 | 2 | 2 | 2 | 2 | 2 | 2 | 5    | 0.63 | -1.58 | 0     | 0     | 0     | 1.58 | 0     |
| chr5 | 176856576 | 176866575 | 4 | 5   | 5 | 5 | 6 | 5 | 2 | 2 | 2 | 2 | 2 | 2 | 5    | 0.63 | -1.58 | 0     | 0     | 0     | 1.58 | 0     |
| chr5 | 176866576 | 178928375 | 4 | 5   | 5 | 5 | 5 | 5 | 2 | 2 | 2 | 2 | 2 | 2 | 4.83 | 0.41 | -2.04 | 0.41  | 0.41  | 0.41  | 0.41 | 0.41  |
| chr5 | 178928376 | 178938375 | 4 | 5   | 5 | 5 | 5 | 5 | 2 | 2 | 2 | 2 | 2 | 2 | 4.83 | 0.41 | -2.04 | 0.41  | 0.41  | 0.41  | 0.41 | 0.41  |
| chr5 | 178938376 | 179418375 | 4 | 5   | 5 | 5 | 5 | 5 | 2 | 2 | 2 | 2 | 2 | 2 | 4.83 | 0.41 | -2.04 | 0.41  | 0.41  | 0.41  | 0.41 | 0.41  |
| chr5 | 179418376 | 179428375 | 4 | 5   | 5 | 5 | 5 | 5 | 2 | 2 | 2 | 2 | 2 | 2 | 4.83 | 0.41 | -2.04 | 0.41  | 0.41  | 0.41  | 0.41 | 0.41  |
| chr5 | 179428376 | 180718375 | 4 | 5   | 5 | 5 | 5 | 5 | 2 | 2 | 2 | 2 | 2 | 2 | 4.83 | 0.41 | -2.04 | 0.41  | 0.41  | 0.41  | 0.41 | 0.41  |
| chr5 | 180718376 | 180728375 | 4 | 5   | 5 | 5 | 5 | 5 | 2 | 2 | 2 | 2 | 2 | 2 | 4.83 | 0.41 | -2.04 | 0.41  | 0.41  | 0.41  | 0.41 | 0.41  |
| chr5 | 180728376 | 180888375 | 4 | 4   | 5 | 5 | 5 | 4 | 2 | 2 | 2 | 2 | 2 | 2 | 4.5  | 0.55 | -0.91 | -0.91 | 0.91  | 0.91  | 0.91 | -0.91 |
| chr6 | 69801     | 301200    | 4 | 4   | 4 | 4 | 4 | 4 | 2 | 2 | 2 | 2 | 2 | 2 | 4    | 0    | 0     | 0     | 0     | 0     | 0    | 0     |
| chr6 | 301201    | 371200    | 4 | 4   | 4 | 4 | 4 | 4 | 2 | 2 | 2 | 2 | 2 | 2 | 1    | 4    | 0     | 0     | 0     | 0     | 0    | 0     |
| chr6 | 371201    | 381200    | 4 | 4   | 4 | 4 | 4 | 4 | 2 | 2 | 2 | 2 | 2 | 2 | 1    | 4    | 0     | 0     | 0     | 0     | 0    | 0     |
| chr6 | 381201    | 2820800   | 4 | 4   | 4 | 4 | 4 | 4 | 2 | 2 | 2 | 2 | 2 | 2 | 2    | 4    | 0     | 0     | 0     | 0     | 0    | 0     |
| chr6 | 2820801   | 2830800   | 4 | 4   | 4 | 4 | 4 | 4 | 2 | 2 | 2 | 2 | 2 | 2 | 2    | 4    | 0     | 0     | 0     | 0     | 0    | 0     |
| chr6 | 2830801   | 3251200   | 4 | 5   | 5 | 5 | 5 | 5 | 2 | 2 | 2 | 2 | 2 | 2 | 2    | 4.83 | 0.41  | -2.04 | 0.41  | 0.41  | 0.41 | 0.41  |
| chr6 | 3251201   | 3261200   | 4 | 5   | 4 | 4 | 5 | 5 | 2 | 2 | 2 | 2 | 2 | 2 | 2    | 4.5  | 0.55  | -0.91 | 0.91  | -0.91 | 0.91 | 0.91  |
| chr6 | 3261201   | 3271200   | 4 | 5   | 4 | 4 | 5 | 5 | 2 | 2 | 2 | 2 | 2 | 2 | 2    | 4.5  | 0.55  | -0.91 | 0.91  | -0.91 | 0.91 | 0.91  |
| chr6 | 3271201   | 11090800  | 4 | 4   | 4 | 4 | 4 | 4 | 2 | 2 | 2 | 2 | 2 | 2 | 2    | 4    | 0     | 0     | 0     | 0     | 0    | 0     |
| chr6 | 11090801  | 11100800  | 4 | 4   | 4 | 4 | 4 | 4 | 2 | 2 | 2 | 2 | 2 | 2 | 2    | 4    | 0     | 0     | 0     | 0     | 0    | 0     |
| chr6 | 11100801  | 11560800  | 4 | 4   | 4 | 4 | 4 | 4 | 2 | 2 | 2 | 2 | 2 | 2 | 2    | 4    | 0     | 0     | 0     | 0     | 0    | 0     |
| chr6 | 11560801  | 11570800  | 4 | 4   | 4 | 4 | 4 | 4 | 2 | 2 | 2 | 2 | 2 | 2 | 2    | 4    | 0     | 0     | 0     | 0     | 0    | 0     |
| chr6 | 11570801  | 29622800  | 4 | 4   | 4 | 4 | 4 | 4 | 2 | 2 | 2 | 2 | 2 | 2 | 2    | 4    | 0     | 0     | 0     | 0     | 0    | 0     |
| chr6 | 29622801  | 29642000  | 4 | 3   | 4 | 4 | 4 | 4 | 2 | 1 | 2 | 2 | 2 | 2 | 2    | 3.83 | 0.41  | 0.41  | -2.04 | 0.41  | 0.41 | 0.41  |
| chr6 | 29642001  | 29653000  | 4 | 3   | 4 | 4 | 4 | 4 | 2 | 1 | 2 | 2 | 2 | 2 | 2    | 3.83 | 0.41  | 0.41  | -2.04 | 0.41  | 0.41 | 0.41  |
| chr6 | 29653001  | 29695400  | 4 | 3   | 4 | 4 | 2 | 4 | 2 | 1 | 2 | 2 | 2 | 1 | 2    | 3.5  | 0.84  | 0.6   | -0.6  | 0.6   | 0.6  | -1.79 |
| chr6 | 29695401  | 29708400  | 4 | 3   | 4 | 4 | 2 | 4 | 2 | 1 | 2 | 2 | 2 | 1 | 2    | 3.5  | 0.84  | 0.6   | -0.6  | 0.6   | 0.6  | -1.79 |
| chr6 | 29708401  | 29736400  | 4 | 3   | 4 | 4 | 4 | 4 | 2 | 1 | 2 | 2 | 2 | 2 | 2    | 3.83 | 0.41  | 0.41  | -2.04 | 0.41  | 0.41 | 0.41  |
| chr6 | 29736401  | 29747000  | 4 | 3   | 4 | 4 | 4 | 4 | 2 | 1 | 2 | 2 | 2 | 2 | 2    | 3.83 | 0.41  | 0.41  | -2.04 | 0.41  | 0.41 | 0.41  |
| chr6 | 29747001  | 29817200  | 4 | 4   | 4 | 4 | 4 | 4 | 2 | 2 | 2 | 2 | 2 | 2 | 2    | 4    | 0     | 0     | 0     | 0     | 0    | 0     |
| chr6 | 29817201  | 29926200  | 2 | 4   | 4 | 4 | 4 | 4 | 1 | 2 | 2 | 2 | 2 | 2 | 2    | 3.67 | 0.82  | -2.04 | 0.41  | 0.41  | 0.41 | 0.41  |
| chr6 | 29926201  | 29945000  | 2 | 4   | 4 | 4 | 4 | 4 | 1 | 2 | 2 | 2 | 2 | 2 | 2    | 3.67 | 0.82  | -2.04 | 0.41  | 0.41  | 0.41 | 0.41  |
| chr6 | 29945001  | 31002600  | 4 | 4   | 4 | 4 | 4 | 4 | 2 | 2 | 2 | 2 | 2 | 2 | 2    | 4    | 0     | 0     | 0     | 0     | 0    | 0     |
| chr6 | 31002601  | 31012600  | 4 | 4   | 4 | 4 | 4 | 4 | 2 | 2 | 2 | 2 | 2 | 2 | 2    | 4    | 0     | 0     | 0     | 0     | 0    | 0     |
| chr6 | 31012601  | 31035600  | 4 | 2   | 4 | 4 | 4 | 4 | 2 | 1 | 2 | 2 | 2 | 2 | 2    | 3.67 | 0.82  | 0.41  | -2.04 | 0.41  | 0.41 | 0.41  |
| chr6 | 31035601  | 31063400  | 4 | 2   | 4 | 4 | 4 | 4 | 2 | 1 | 2 | 2 | 2 | 1 | 2    | 3.67 | 0.82  | 0.41  | -2.04 | 0.41  | 0.41 | 0.41  |
| chr6 | 31063401  | 31075000  | 4 | 2   | 4 | 4 | 4 | 4 | 2 | 1 | 2 | 2 | 2 | 1 | 2    | 3.67 | 0.82  | 0.41  | -2.04 | 0.41  | 0.41 | 0.41  |
| chr6 | 31075001  | 31426000  | 4 | 4   | 4 | 4 | 4 | 4 | 2 | 2 | 2 | 2 | 2 | 1 | 2    | 4    | 0     | 0     | 0     | 0     | 0    | 0     |
| chr6 | 31426001  | 31436000  | 4 | 4   | 4 | 4 | 4 | 4 | 2 | 2 | 2 | 2 | 2 | 1 | 2    | 4    | 0     | 0     | 0     | 0     | 0    | 0     |
| chr6 | 31436001  | 31489600  | 4 | 4   | 0 | 4 | 4 | 4 | 2 | 2 | 0 | 2 | 2 | 1 | 2    | 3.33 | 1.63  | 0.41  | 0.41  | -2.04 | 0.41 | 0.41  |
| chr6 | 31489601  | 31501000  | 4 | 4   | 0 | 4 | 4 | 4 | 2 | 2 | 0 | 2 | 2 | 1 | 2    | 3.33 | 1.63  | 0.41  | 0.41  | -2.04 | 0.41 | 0.41  |
| chr6 | 31501001  | 47690600  | 4 | 4   | 4 | 4 | 4 | 4 | 2 | 2 | 2 | 2 | 2 | 2 | 2    | 4    | 0     | 0     | 0     | 0     | 0    | 0     |
| chr6 | 47690601  | 47700600  | 4 | 4   | 4 | 4 | 4 | 4 | 2 | 2 | 2 | 2 | 2 | 2 | 2    | 4    | 0     | 0     | 0     | 0     | 0    | 0     |
| chr6 | 47700601  | 48780600  | 4 | 4   | 4 | 4 | 4 | 4 | 2 | 2 | 2 | 2 | 2 | 2 | 2    | 4    | 0     | 0     | 0     | 0     | 0    | 0     |
| chr6 | 48780601  | 48790600  | 4 | 4   | 4 | 4 | 4 | 4 | 2 | 2 | 2 | 2 | 2 | 2 | 2    | 4    | 0     | 0     | 0     | 0     | 0    | 0     |
| chr6 | 48790601  | 48860600  | 4 | 4   | 4 | 4 | 3 | 4 | 2 | 2 | 2 | 2 | 2 | 1 | 2    | 3.83 | 0.41  | 0.41  | 0.41  | 0.41  | 0.41 | -2.04 |
| chr6 | 48860601  | 48870600  | 4 | 4   | 4 | 4 | 3 | 4 | 2 | 2 | 2 | 2 | 2 | 1 | 2    | 3.83 | 0.41  | 0.41  | 0.41  | 0.41  | 0.41 | -2.04 |
| chr6 | 48870601  | 58681995  | 4 | 4   | 4 | 4 | 4 | 4 | 2 | 2 | 2 | 2 | 2 | 2 | 2    | 4    | 0     | 0     | 0     | 0     | 0    | 0     |
| chr6 | 58681996  | 63309985  | 4 | 4   | 4 | 4 | 4 | 4 | 2 | 2 | 2 | 2 | 2 | 2 | 2    | 4    | 0     | 0     | 0     | 0     | 0    | 0     |
| chr6 | 63309986  | 63999985  | 4 | 4   | 4 | 4 | 4 | 4 | 2 | 2 | 2 | 2 | 2 | 2 | 2    | 4    | 0     | 0     | 0     | 0     | 0    | 0     |
| chr6 | 63999986  | 64009985  | 4 | 4   | 4 | 4 | 4 | 4 | 2 | 2 | 2 | 2 | 2 | 2 | 2    | 4    | 0     | 0     | 0     | 0     | 0    | 0     |
| chr6 | 64009986  | 65229985  | 4 | 4   | 4 | 4 | 4 | 4 | 2 | 2 | 2 | 2 | 2 | 2 | 2    | 4    | 0     | 0     | 0     | 0     | 0    | 0     |
| chr6 | 65229986  | 65239985  | 4 | 4   | 4 | 4 | 4 | 4 | 2 | 2 | 2 | 2 | 2 | 2 | 2    | 4    | 0     | 0     | 0     | 0     | 0    | 0     |
| chr6 | 65239986  | 73609985  | 4 | 4   | 4 | 4 | 4 | 4 | 2 | 2 | 2 | 2 | 2 | 2 | 2    | 4    | 0     | 0     | 0     | 0     | 0    | 0     |
| chr6 | 73609986  | 73619985  | 4 | 4   | 4 | 4 | 4 | 4 | 2 | 2 | 2 | 2 | 2 | 2 | 2    | 4    | 0     | 0     | 0     | 0     | 0    | 0     |
| chr6 | 73619986  | 74839385  | 4 | 4   | 4 | 4 | 4 | 4 | 2 | 2 | 2 | 2 | 2 | 2 | 2    | 4    | 0     | 0     | 0     | 0     | 0    | 0     |
| chr6 | 74839386  | 74849385  | 4 | 4   | 4 | 4 | 4 | 4 | 2 | 2 | 2 | 2 | 2 | 2 | 2    | 4    | 0     | 0     | 0     | 0     | 0    | 0     |
| chr6 | 74849386  | 79619385  | 4 | 4   | 4 | 4 | 4 | 4 | 2 | 2 | 2 | 2 | 2 | 2 | 2    | 4    | 0     | 0     | 0     | 0     | 0    | 0     |
| chr6 | 79619386  | 79629385  | 4 | 4   | 4 | 4 | 4 | 4 | 2 | 2 | 2 | 2 | 2 | 2 | 2    | 4    | 0     | 0     | 0     | 0     | 0    | 0     |
| chr6 | 79629386  | 79819385  | 4 | 4   | 4 | 4 | 4 | 4 | 2 | 2 | 2 | 2 | 2 | 2 | 2    | 4    | 0     | 0     | 0     | 0     | 0    | 0     |
| chr6 | 79819386  | 79829385  | 4 | 4   | 4 | 4 | 4 | 4 | 2 | 2 | 2 | 2 | 2 | 2 | 2    | 4    | 0     | 0     | 0     | 0     | 0    | 0     |
| chr6 | 79829386  | 86069585  | 4 | 4   | 4 | 4 | 4 | 4 | 2 | 2 | 2 | 2 | 2 | 2 | 2    | 4    | 0     | 0     | 0     | 0     | 0    | 0     |
| chr6 | 86069586  | 86079585  | 4 | 4   | 4 | 4 | 4 | 4 | 2 | 2 | 2 | 2 | 2 | 2 | 2    | 4    | 0     | 0     | 0     | 0     | 0    | 0     |
| chr6 | 86079586  | 86409585  | 4 | 4   | 4 | 4 | 4 | 4 | 2 | 2 | 2 | 2 | 2 | 2 | 2    | 4    | 0     | 0     | 0     | 0     | 0    | 0     |
| chr6 | 86409586  | 86419585  | 4 | 4   | 4 | 4 | 4 | 4 | 2 | 2 | 2 | 2 | 2 | 2 | 2    | 4    | 0     | 0     | 0     | 0     | 0    | 0     |
| chr6 | 86419586  | 86839585  | 4 | 4   | 4 | 4 | 4 | 4 | 2 | 2 | 2 | 2 | 2 | 2 | 2    | 4    | 0     | 0     | 0     | 0     | 0    | 0     |
| chr6 | 86839586  | 86849585  | 4 | 4   | 4 | 4 | 4 | 4 | 2 | 2 | 2 | 2 | 2 | 2 | 2    | 4    | 0     | 0     | 0     | 0     | 0    | 0     |
| chr6 | 86849586  | 86919585  | 4 | 4   | 4 | 4 | 4 | 4 | 2 | 2 | 2 | 2 | 2 | 2 | 2    | 4    | 0     | 0     | 0     | 0     | 0    | 0     |
| chr6 | 86919586  | 86929585  | 4 | 4   | 4 | 4 | 4 | 4 | 2 | 2 | 2 | 2 | 2 | 2 | 2    | 4    | 0     | 0     | 0     | 0     | 0    | 0     |
| chr6 | 86929586  | 170932165 | 4 | 4   | 4 | 4 | 4 | 4 | 2 | 2 | 2 | 2 | 2 | 2 | 2    | 4    | 0     | 0     | 0     | 0     | 0    | 0     |
| chr6 | 170932166 | 171041165 | 4 | 4   | 4 | 4 | 4 | 4 | 2 | 2 | 2 | 2 | 2 | 2 | 1    | 4    | 0     | 0     | 0     | 0     | 0    | 0     |
| chr7 | 19801     | 2909395   | 4 | 5   | 5 | 5 | 5 | 5 | 2 | 2 | 2 | 2 | 2 | 2 | 2    | 4.83 | 0.41  | -2.04 | 0.41  | 0.41  | 0.41 | 0.41  |
| chr7 | 2909396   | 2919395   | 4 | 5   | 5 | 5 | 5 | 5 | 2 | 2 | 2 | 2 | 2 | 2 | 2    | 4.83 | 0.41  | -2.04 | 0.41  | 0.41  | 0.41 | 0.41  |
| chr7 | 2919396   | 5029395   | 4 | 5   | 5 | 5 | 5 | 5 | 2 | 2 | 2 | 2 | 2 | 2 | 2    | 4.83 | 0.41  | -2.04 | 0.41  | 0.41  | 0.41 | 0.41  |
| chr7 | 5029396   | 5039395   | 4 | 5   | 5 | 5 | 5 | 5 | 2 | 2 | 2 | 2 | 2 | 2 | 2    | 4.83 | 0.41  | -2.04 | 0.41  | 0.41  | 0.41 | 0.41  |
| chr7 | 5039396   | 5759595   | 4 | 5</ |   |   |   |   |   |   |   |   |   |   |      |      |       |       |       |       |      |       |

|      |           |           |   |     |   |   |   |   |   |   |   |   |   |   |      |      |       |       |       |       |       |       |       |
|------|-----------|-----------|---|-----|---|---|---|---|---|---|---|---|---|---|------|------|-------|-------|-------|-------|-------|-------|-------|
| chr7 | 6769596   | 7969595   | 4 | 5   | 5 | 5 | 5 | 5 | 2 | 2 | 2 | 2 | 2 | 2 | 4.83 | 0.41 | -2.04 | 0.41  | 0.41  | 0.41  | 0.41  | 0.41  | 0.41  |
| chr7 | 7969596   | 7979595   | 4 | 5   | 5 | 5 | 5 | 5 | 2 | 2 | 2 | 2 | 2 | 2 | 4.83 | 0.41 | -2.04 | 0.41  | 0.41  | 0.41  | 0.41  | 0.41  | 0.41  |
| chr7 | 7979596   | 8249595   | 4 | 5   | 5 | 5 | 5 | 5 | 2 | 2 | 2 | 2 | 2 | 2 | 4.83 | 0.41 | -2.04 | 0.41  | 0.41  | 0.41  | 0.41  | 0.41  | 0.41  |
| chr7 | 8249596   | 8259595   | 4 | 5   | 5 | 5 | 5 | 5 | 2 | 2 | 2 | 2 | 2 | 2 | 4.83 | 0.41 | -2.04 | 0.41  | 0.41  | 0.41  | 0.41  | 0.41  | 0.41  |
| chr7 | 8259596   | 35669995  | 4 | 5   | 5 | 5 | 5 | 5 | 2 | 2 | 2 | 2 | 2 | 2 | 4.83 | 0.41 | -2.04 | 0.41  | 0.41  | 0.41  | 0.41  | 0.41  | 0.41  |
| chr7 | 35669996  | 35679995  | 4 | 5   | 5 | 5 | 5 | 5 | 2 | 2 | 2 | 2 | 2 | 2 | 4.83 | 0.41 | -2.04 | 0.41  | 0.41  | 0.41  | 0.41  | 0.41  | 0.41  |
| chr7 | 35679996  | 37530395  | 4 | 5   | 5 | 5 | 5 | 5 | 2 | 2 | 2 | 2 | 2 | 2 | 4.83 | 0.41 | -2.04 | 0.41  | 0.41  | 0.41  | 0.41  | 0.41  | 0.41  |
| chr7 | 37530396  | 37540395  | 4 | 5   | 5 | 5 | 5 | 5 | 2 | 2 | 2 | 2 | 2 | 2 | 4.83 | 0.41 | -2.04 | 0.41  | 0.41  | 0.41  | 0.41  | 0.41  | 0.41  |
| chr7 | 37540396  | 38290395  | 4 | 5   | 5 | 5 | 5 | 5 | 2 | 2 | 2 | 2 | 2 | 2 | 4.83 | 0.41 | -2.04 | 0.41  | 0.41  | 0.41  | 0.41  | 0.41  | 0.41  |
| chr7 | 38290396  | 38300395  | 5 | 5   | 5 | 5 | 5 | 5 | 2 | 2 | 2 | 2 | 2 | 2 | 5    | 0    | 0     | 0     | 0     | 0     | 0     | 0     | 0     |
| chr7 | 38300396  | 38310795  | 5 | 5   | 7 | 5 | 6 | 5 | 2 | 2 | 3 | 2 | 3 | 2 | 5.5  | 0.84 | -0.6  | -0.6  | 1.79  | -0.6  | 0.6   | -0.6  | -0.6  |
| chr7 | 38310796  | 38389995  | 5 | 6   | 7 | 5 | 6 | 6 | 2 | 3 | 3 | 2 | 3 | 2 | 5.83 | 0.75 | -1.11 | 0.22  | 1.55  | -1.11 | 0.22  | 0.22  | 0.22  |
| chr7 | 38389996  | 38399995  | 5 | 6   | 7 | 5 | 6 | 6 | 2 | 3 | 3 | 2 | 3 | 2 | 5.83 | 0.75 | -1.11 | 0.22  | 1.55  | -1.11 | 0.22  | 0.22  | 0.22  |
| chr7 | 38399996  | 57984990  | 4 | 5   | 5 | 5 | 5 | 5 | 2 | 2 | 2 | 2 | 2 | 2 | 4.83 | 0.41 | -2.04 | 0.41  | 0.41  | 0.41  | 0.41  | 0.41  | 0.41  |
| chr7 | 57984991  | 61737180  | 4 | 5   | 5 | 5 | 5 | 5 | 2 | 2 | 2 | 2 | 2 | 2 | 4.83 | 0.41 | -2.04 | 0.41  | 0.41  | 0.41  | 0.41  | 0.41  | 0.41  |
| chr7 | 61737181  | 62677375  | 4 | 5   | 5 | 5 | 5 | 5 | 2 | 2 | 2 | 2 | 2 | 2 | 4.83 | 0.41 | -2.04 | 0.41  | 0.41  | 0.41  | 0.41  | 0.41  | 0.41  |
| chr7 | 62677376  | 62687375  | 4 | 5   | 5 | 5 | 5 | 5 | 2 | 2 | 2 | 2 | 2 | 2 | 4.83 | 0.41 | -2.04 | 0.41  | 0.41  | 0.41  | 0.41  | 0.41  | 0.41  |
| chr7 | 62687376  | 62797375  | 4 | 5   | 5 | 5 | 4 | 5 | 2 | 2 | 2 | 2 | 2 | 2 | 4.67 | 0.52 | -1.29 | 0.65  | 0.65  | 0.65  | -1.29 | 0.65  | 0.65  |
| chr7 | 62797376  | 62807375  | 4 | 5   | 5 | 5 | 4 | 5 | 2 | 2 | 2 | 2 | 2 | 2 | 4.67 | 0.52 | -1.29 | 0.65  | 0.65  | 0.65  | -1.29 | 0.65  | 0.65  |
| chr7 | 62807376  | 63767375  | 4 | 5   | 5 | 5 | 5 | 5 | 2 | 2 | 2 | 2 | 2 | 2 | 4.83 | 0.41 | -2.04 | 0.41  | 0.41  | 0.41  | 0.41  | 0.41  | 0.41  |
| chr7 | 63767376  | 63777375  | 4 | 5   | 5 | 5 | 5 | 5 | 2 | 2 | 2 | 2 | 2 | 2 | 4.83 | 0.41 | -2.04 | 0.41  | 0.41  | 0.41  | 0.41  | 0.41  | 0.41  |
| chr7 | 63777376  | 67687375  | 4 | 5   | 5 | 5 | 5 | 5 | 2 | 2 | 2 | 2 | 2 | 2 | 4.83 | 0.41 | -2.04 | 0.41  | 0.41  | 0.41  | 0.41  | 0.41  | 0.41  |
| chr7 | 67687376  | 67697375  | 4 | 5   | 5 | 5 | 5 | 5 | 2 | 2 | 2 | 2 | 2 | 2 | 4.83 | 0.41 | -2.04 | 0.41  | 0.41  | 0.41  | 0.41  | 0.41  | 0.41  |
| chr7 | 67697376  | 72002175  | 4 | 5   | 5 | 5 | 5 | 5 | 2 | 2 | 2 | 2 | 2 | 2 | 4.83 | 0.41 | -2.04 | 0.41  | 0.41  | 0.41  | 0.41  | 0.41  | 0.41  |
| chr7 | 72002176  | 72012175  | 4 | 5   | 5 | 5 | 5 | 5 | 2 | 2 | 2 | 2 | 2 | 2 | 4.83 | 0.41 | -2.04 | 0.41  | 0.41  | 0.41  | 0.41  | 0.41  | 0.41  |
| chr7 | 72012176  | 77597570  | 4 | 5   | 5 | 5 | 5 | 5 | 2 | 2 | 2 | 2 | 2 | 2 | 4.83 | 0.41 | -2.04 | 0.41  | 0.41  | 0.41  | 0.41  | 0.41  | 0.41  |
| chr7 | 77597571  | 77607570  | 4 | 5   | 5 | 5 | 5 | 5 | 2 | 2 | 2 | 2 | 2 | 2 | 4.83 | 0.41 | -2.04 | 0.41  | 0.41  | 0.41  | 0.41  | 0.41  | 0.41  |
| chr7 | 77607571  | 82618170  | 4 | 5   | 5 | 5 | 5 | 5 | 2 | 2 | 2 | 2 | 2 | 2 | 4.83 | 0.41 | -2.04 | 0.41  | 0.41  | 0.41  | 0.41  | 0.41  | 0.41  |
| chr7 | 82618171  | 82628170  | 4 | 5   | 5 | 5 | 5 | 5 | 2 | 2 | 2 | 2 | 2 | 2 | 4.83 | 0.41 | -2.04 | 0.41  | 0.41  | 0.41  | 0.41  | 0.41  | 0.41  |
| chr7 | 82628171  | 82728170  | 4 | 5   | 5 | 5 | 4 | 5 | 2 | 2 | 2 | 2 | 2 | 2 | 4.67 | 0.52 | -1.29 | 0.65  | 0.65  | 0.65  | -1.29 | 0.65  | 0.65  |
| chr7 | 82728171  | 82738170  | 4 | 5   | 5 | 5 | 4 | 5 | 2 | 2 | 2 | 2 | 2 | 2 | 4.67 | 0.52 | -1.29 | 0.65  | 0.65  | 0.65  | -1.29 | 0.65  | 0.65  |
| chr7 | 82738171  | 114571365 | 4 | 5   | 5 | 5 | 5 | 5 | 2 | 2 | 2 | 2 | 2 | 2 | 4.83 | 0.41 | -2.04 | 0.41  | 0.41  | 0.41  | 0.41  | 0.41  | 0.41  |
| chr7 | 114571366 | 114671365 | 4 | 5   | 5 | 5 | 5 | 5 | 2 | 2 | 2 | 2 | 2 | 2 | 4.83 | 0.41 | -2.04 | 0.41  | 0.41  | 0.41  | 0.41  | 0.41  | 0.41  |
| chr7 | 114671366 | 114681365 | 4 | 5   | 5 | 5 | 5 | 5 | 2 | 2 | 2 | 2 | 2 | 2 | 4.83 | 0.41 | -2.04 | 0.41  | 0.41  | 0.41  | 0.41  | 0.41  | 0.41  |
| chr7 | 114681366 | 142337950 | 4 | 5   | 5 | 5 | 5 | 5 | 2 | 2 | 2 | 2 | 2 | 2 | 4.83 | 0.41 | -2.04 | 0.41  | 0.41  | 0.41  | 0.41  | 0.41  | 0.41  |
| chr7 | 142337951 | 142347950 | 4 | 5   | 5 | 5 | 5 | 5 | 2 | 2 | 2 | 2 | 2 | 2 | 4.83 | 0.41 | -2.04 | 0.41  | 0.41  | 0.41  | 0.41  | 0.41  | 0.41  |
| chr7 | 142347951 | 142447950 | 4 | 5   | 6 | 5 | 5 | 6 | 2 | 2 | 1 | 2 | 2 | 2 | 5.17 | 0.75 | -1.55 | -0.22 | 1.11  | -0.22 | -0.22 | 1.11  | 1.11  |
| chr7 | 142447951 | 142457950 | 4 | 5   | 6 | 5 | 5 | 6 | 2 | 2 | 1 | 2 | 2 | 2 | 5.17 | 0.75 | -1.55 | -0.22 | 1.11  | -0.22 | -0.22 | 1.11  | 1.11  |
| chr7 | 142457951 | 142489550 | 4 | 5   | 6 | 5 | 5 | 5 | 2 | 2 | 1 | 2 | 2 | 2 | 5    | 0.63 | -1.58 | 0     | 1.58  | 0     | 0     | 0     | 0     |
| chr7 | 142489551 | 142499550 | 4 | 5   | 6 | 5 | 5 | 5 | 2 | 2 | 1 | 2 | 2 | 2 | 5    | 0.63 | -1.58 | 0     | 1.58  | 0     | 0     | 0     | 0     |
| chr7 | 142499551 | 153153545 | 4 | 5   | 5 | 5 | 5 | 5 | 2 | 2 | 2 | 2 | 2 | 2 | 4.83 | 0.41 | -2.04 | 0.41  | 0.41  | 0.41  | 0.41  | 0.41  | 0.41  |
| chr7 | 153153546 | 153163545 | 4 | 5   | 5 | 5 | 5 | 5 | 2 | 2 | 2 | 2 | 2 | 2 | 4.83 | 0.41 | -2.04 | 0.41  | 0.41  | 0.41  | 0.41  | 0.41  | 0.41  |
| chr7 | 153163546 | 153233545 | 4 | 5   | 5 | 5 | 4 | 5 | 2 | 2 | 2 | 2 | 2 | 2 | 4.67 | 0.52 | -1.29 | 0.65  | 0.65  | 0.65  | -1.29 | 0.65  | 0.65  |
| chr7 | 153233546 | 153243545 | 4 | 5   | 5 | 5 | 4 | 5 | 2 | 2 | 2 | 2 | 2 | 2 | 4.67 | 0.52 | -1.29 | 0.65  | 0.65  | 0.65  | -1.29 | 0.65  | 0.65  |
| chr7 | 153243546 | 159110740 | 4 | 5   | 5 | 5 | 5 | 5 | 2 | 2 | 2 | 2 | 2 | 2 | 4.83 | 0.41 | -2.04 | 0.41  | 0.41  | 0.41  | 0.41  | 0.41  | 0.41  |
| chr8 | 19801     | 121200    | 4 | 5   | 5 | 5 | 4 | 5 | 2 | 2 | 2 | 0 | 2 | 2 | 4.67 | 0.52 | -1.29 | 0.65  | 0.65  | 0.65  | -1.29 | 0.65  | 0.65  |
| chr8 | 121201    | 132000    | 4 | 5   | 3 | 5 | 4 | 3 | 2 | 2 | 0 | 0 | 2 | 0 | 4    | 0.89 | 0     | 1.12  | -1.12 | 1.12  | 0     | -1.12 | -1.12 |
| chr8 | 132001    | 163800    | 4 | 3   | 3 | 3 | 3 | 3 | 2 | 1 | 0 | 0 | 0 | 0 | 3.17 | 0.41 | -2.04 | -0.41 | -0.41 | -0.41 | -0.41 | -0.41 | -0.41 |
| chr8 | 163801    | 734200    | 2 | 3   | 3 | 3 | 3 | 3 | 0 | 1 | 0 | 0 | 0 | 0 | 2.83 | 0.41 | -2.04 | 0.41  | 0.41  | 0.41  | 0.41  | 0.41  | 0.41  |
| chr8 | 734201    | 744200    | 2 | 3   | 3 | 3 | 3 | 3 | 0 | 1 | 0 | 0 | 0 | 0 | 2.83 | 0.41 | -2.04 | 0.41  | 0.41  | 0.41  | 0.41  | 0.41  | 0.41  |
| chr8 | 744201    | 5217600   | 2 | 3   | 3 | 3 | 3 | 3 | 0 | 1 | 0 | 0 | 0 | 0 | 2.83 | 0.41 | -2.04 | 0.41  | 0.41  | 0.41  | 0.41  | 0.41  | 0.41  |
| chr8 | 5217601   | 5227600   | 2 | 3   | 3 | 3 | 3 | 3 | 0 | 1 | 0 | 0 | 0 | 0 | 2.83 | 0.41 | -2.04 | 0.41  | 0.41  | 0.41  | 0.41  | 0.41  | 0.41  |
| chr8 | 5227601   | 5367600   | 4 | 5   | 5 | 5 | 5 | 5 | 2 | 2 | 2 | 2 | 2 | 2 | 4.83 | 0.41 | -2.04 | 0.41  | 0.41  | 0.41  | 0.41  | 0.41  | 0.41  |
| chr8 | 5367601   | 5377600   | 4 | 5   | 5 | 5 | 5 | 5 | 2 | 2 | 2 | 2 | 2 | 2 | 4.83 | 0.41 | -2.04 | 0.41  | 0.41  | 0.41  | 0.41  | 0.41  | 0.41  |
| chr8 | 5377601   | 5387800   | 2 | 3   | 5 | 3 | 3 | 3 | 0 | 1 | 2 | 0 | 0 | 0 | 3.17 | 0.98 | -1.19 | -0.17 | 1.86  | -0.17 | -0.17 | -0.17 | -0.17 |
| chr8 | 5387801   | 8030195   | 2 | 3   | 3 | 3 | 3 | 3 | 0 | 1 | 0 | 0 | 0 | 0 | 2.83 | 0.41 | -2.04 | 0.41  | 0.41  | 0.41  | 0.41  | 0.41  | 0.41  |
| chr8 | 8030196   | 8040195   | 2 | 3   | 3 | 3 | 3 | 3 | 0 | 1 | 0 | 0 | 0 | 0 | 2.83 | 0.41 | -2.04 | 0.41  | 0.41  | 0.41  | 0.41  | 0.41  | 0.41  |
| chr8 | 8040196   | 8080195   | 2 | 3   | 3 | 3 | 2 | 2 | 0 | 1 | 0 | 0 | 1 | 1 | 2.5  | 0.55 | -0.91 | 0.91  | 0.91  | 0.91  | -0.91 | -0.91 | -0.91 |
| chr8 | 8080196   | 8090195   | 2 | 3   | 3 | 3 | 2 | 2 | 0 | 1 | 0 | 0 | 1 | 1 | 2.5  | 0.55 | -0.91 | 0.91  | 0.91  | 0.91  | -0.91 | -0.91 | -0.91 |
| chr8 | 8090196   | 11540195  | 2 | 3   | 3 | 3 | 3 | 3 | 0 | 1 | 0 | 0 | 0 | 0 | 2.83 | 0.41 | -2.04 | 0.41  | 0.41  | 0.41  | 0.41  | 0.41  | 0.41  |
| chr8 | 11540196  | 11550195  | 2 | 3   | 3 | 3 | 3 | 3 | 0 | 1 | 0 | 0 | 0 | 0 | 2.83 | 0.41 | -2.04 | 0.41  | 0.41  | 0.41  | 0.41  | 0.41  | 0.41  |
| chr8 | 11550196  | 11690195  | 2 | 3   | 3 | 3 | 3 | 3 | 0 | 1 | 0 | 0 | 0 | 0 | 2.83 | 0.41 | -2.04 | 0.41  | 0.41  | 0.41  | 0.41  | 0.41  | 0.41  |
| chr8 | 11690196  | 11700195  | 2 | 3   | 3 | 3 | 3 | 3 | 0 | 1 | 0 | 0 | 0 | 0 | 2.83 | 0.41 | -2.04 | 0.41  | 0.41  | 0.41  | 0.41  | 0.41  | 0.41  |
| chr8 | 11700196  | 11920795  | 2 | 3   | 3 | 3 | 3 | 3 | 0 | 1 | 0 | 0 | 0 | 0 | 2.83 | 0.41 | -2.04 | 0.41  | 0.41  | 0.41  | 0.41  | 0.41  | 0.41  |
| chr8 | 11920796  | 11930795  | 2 | 3   | 3 | 3 | 3 | 3 | 0 | 1 | 0 | 0 | 0 | 0 | 2.83 | 0.41 | -2.04 | 0.41  | 0.41  | 0.41  | 0.41  | 0.41  | 0.41  |
| chr8 | 11930796  | 11942795  | 3 | 3</ |   |   |   |   |   |   |   |   |   |   |      |      |       |       |       |       |       |       |       |

|      |           |           |   |   |   |   |   |   |   |   |   |   |   |   |      |      |       |       |       |       |       |       |       |
|------|-----------|-----------|---|---|---|---|---|---|---|---|---|---|---|---|------|------|-------|-------|-------|-------|-------|-------|-------|
| chr8 | 12496191  | 12844590  | 2 | 3 | 3 | 3 | 3 | 3 | 0 | 1 | 0 | 0 | 0 | 0 | 2.83 | 0.41 | -2.04 | 0.41  | 0.41  | 0.41  | 0.41  | 0.41  | 0.41  |
| chr8 | 12844591  | 12854590  | 2 | 3 | 3 | 3 | 3 | 3 | 0 | 1 | 0 | 0 | 0 | 0 | 2.83 | 0.41 | -2.04 | 0.41  | 0.41  | 0.41  | 0.41  | 0.41  | 0.41  |
| chr8 | 12854591  | 13324590  | 2 | 3 | 3 | 3 | 3 | 3 | 0 | 1 | 0 | 0 | 0 | 0 | 2.83 | 0.41 | -2.04 | 0.41  | 0.41  | 0.41  | 0.41  | 0.41  | 0.41  |
| chr8 | 13324591  | 13334590  | 2 | 3 | 3 | 3 | 3 | 3 | 0 | 1 | 0 | 0 | 0 | 0 | 2.83 | 0.41 | -2.04 | 0.41  | 0.41  | 0.41  | 0.41  | 0.41  | 0.41  |
| chr8 | 13334591  | 16934590  | 2 | 3 | 3 | 3 | 3 | 3 | 0 | 1 | 0 | 0 | 0 | 0 | 2.83 | 0.41 | -2.04 | 0.41  | 0.41  | 0.41  | 0.41  | 0.41  | 0.41  |
| chr8 | 16934591  | 16944590  | 2 | 3 | 3 | 3 | 3 | 3 | 0 | 1 | 0 | 0 | 0 | 0 | 2.83 | 0.41 | -2.04 | 0.41  | 0.41  | 0.41  | 0.41  | 0.41  | 0.41  |
| chr8 | 16944591  | 18054590  | 2 | 3 | 3 | 3 | 3 | 3 | 0 | 1 | 0 | 0 | 0 | 0 | 2.83 | 0.41 | -2.04 | 0.41  | 0.41  | 0.41  | 0.41  | 0.41  | 0.41  |
| chr8 | 18054591  | 18064590  | 2 | 3 | 3 | 3 | 3 | 3 | 0 | 1 | 0 | 0 | 0 | 0 | 2.83 | 0.41 | -2.04 | 0.41  | 0.41  | 0.41  | 0.41  | 0.41  | 0.41  |
| chr8 | 18064591  | 36159190  | 2 | 3 | 3 | 3 | 3 | 3 | 0 | 1 | 0 | 0 | 0 | 0 | 2.83 | 0.41 | -2.04 | 0.41  | 0.41  | 0.41  | 0.41  | 0.41  | 0.41  |
| chr8 | 36159191  | 36169190  | 2 | 3 | 3 | 3 | 3 | 3 | 0 | 1 | 0 | 0 | 0 | 0 | 2.83 | 0.41 | -2.04 | 0.41  | 0.41  | 0.41  | 0.41  | 0.41  | 0.41  |
| chr8 | 36169191  | 43082390  | 3 | 3 | 3 | 3 | 3 | 3 | 1 | 1 | 0 | 0 | 0 | 0 | 3    | 0    | 0     | 0     | 0     | 0     | 0     | 0     | 0     |
| chr8 | 43082391  | 48109985  | 3 | 3 | 3 | 3 | 3 | 3 | 1 | 1 | 0 | 0 | 0 | 0 | 3    | 0    | 0     | 0     | 0     | 0     | 0     | 0     | 0     |
| chr8 | 48109986  | 49045480  | 3 | 3 | 3 | 3 | 3 | 3 | 1 | 1 | 0 | 0 | 0 | 0 | 3    | 0    | 0     | 0     | 0     | 0     | 0     | 0     | 0     |
| chr8 | 49045481  | 49155280  | 3 | 3 | 3 | 3 | 3 | 3 | 1 | 1 | 0 | 0 | 0 | 0 | 3    | 0    | 0     | 0     | 0     | 0     | 0     | 0     | 0     |
| chr8 | 49155281  | 49475480  | 3 | 3 | 3 | 3 | 3 | 3 | 1 | 1 | 0 | 0 | 0 | 0 | 3    | 0    | 0     | 0     | 0     | 0     | 0     | 0     | 0     |
| chr8 | 49475481  | 49485480  | 3 | 3 | 3 | 3 | 3 | 3 | 1 | 1 | 0 | 0 | 0 | 0 | 3    | 0    | 0     | 0     | 0     | 0     | 0     | 0     | 0     |
| chr8 | 49485481  | 74145480  | 3 | 3 | 3 | 3 | 3 | 3 | 1 | 1 | 0 | 0 | 0 | 0 | 3    | 0    | 0     | 0     | 0     | 0     | 0     | 0     | 0     |
| chr8 | 74145481  | 74155480  | 3 | 3 | 3 | 3 | 3 | 3 | 1 | 1 | 0 | 0 | 0 | 0 | 3    | 0    | 0     | 0     | 0     | 0     | 0     | 0     | 0     |
| chr8 | 74155481  | 74905480  | 3 | 3 | 3 | 3 | 3 | 3 | 1 | 1 | 0 | 0 | 0 | 0 | 3    | 0    | 0     | 0     | 0     | 0     | 0     | 0     | 0     |
| chr8 | 74905481  | 74915480  | 3 | 3 | 3 | 3 | 3 | 3 | 1 | 1 | 0 | 0 | 0 | 0 | 3    | 0    | 0     | 0     | 0     | 0     | 0     | 0     | 0     |
| chr8 | 74915481  | 86005480  | 3 | 3 | 3 | 3 | 3 | 3 | 1 | 1 | 0 | 0 | 0 | 0 | 3    | 0    | 0     | 0     | 0     | 0     | 0     | 0     | 0     |
| chr8 | 86005481  | 86015480  | 3 | 3 | 3 | 3 | 3 | 3 | 1 | 1 | 0 | 0 | 0 | 0 | 3    | 0    | 0     | 0     | 0     | 0     | 0     | 0     | 0     |
| chr8 | 86015481  | 86175480  | 3 | 3 | 3 | 3 | 3 | 3 | 1 | 1 | 0 | 0 | 0 | 1 | 3    | 0    | 0     | 0     | 0     | 0     | 0     | 0     | 0     |
| chr8 | 86175481  | 86185480  | 3 | 3 | 3 | 3 | 3 | 3 | 1 | 1 | 0 | 0 | 0 | 1 | 3    | 0    | 0     | 0     | 0     | 0     | 0     | 0     | 0     |
| chr8 | 86185481  | 87236075  | 3 | 3 | 3 | 3 | 3 | 3 | 1 | 1 | 0 | 0 | 0 | 0 | 3    | 0    | 0     | 0     | 0     | 0     | 0     | 0     | 0     |
| chr8 | 87236076  | 87246075  | 3 | 3 | 3 | 3 | 3 | 3 | 1 | 1 | 0 | 0 | 0 | 0 | 3    | 0    | 0     | 0     | 0     | 0     | 0     | 0     | 0     |
| chr8 | 87246076  | 87596075  | 3 | 3 | 3 | 3 | 3 | 3 | 1 | 1 | 0 | 0 | 0 | 0 | 3    | 0    | 0     | 0     | 0     | 0     | 0     | 0     | 0     |
| chr8 | 87596076  | 87606075  | 3 | 3 | 3 | 3 | 3 | 3 | 1 | 1 | 0 | 0 | 0 | 0 | 3    | 0    | 0     | 0     | 0     | 0     | 0     | 0     | 0     |
| chr8 | 87606076  | 118541075 | 3 | 3 | 3 | 3 | 3 | 3 | 1 | 1 | 0 | 0 | 0 | 0 | 3    | 0    | 0     | 0     | 0     | 0     | 0     | 0     | 0     |
| chr8 | 118541076 | 118551075 | 3 | 3 | 3 | 4 | 3 | 3 | 1 | 1 | 0 | 0 | 0 | 0 | 3.17 | 0.41 | -0.41 | -0.41 | -0.41 | 2.04  | -0.41 | -0.41 | -0.41 |
| chr8 | 118551076 | 118561075 | 4 | 3 | 5 | 4 | 3 | 4 | 2 | 1 | 0 | 0 | 0 | 0 | 3.83 | 0.75 | 0.22  | -1.11 | 1.55  | 0.22  | -1.11 | 0.22  | 0.22  |
| chr8 | 118561076 | 146282270 | 4 | 4 | 5 | 4 | 4 | 4 | 2 | 1 | 0 | 0 | 0 | 0 | 4.17 | 0.41 | -0.41 | -0.41 | 2.04  | -0.41 | -0.41 | -0.41 | -0.41 |
| chr9 | 19801     | 39800     | 3 | 4 | 5 | 5 | 4 | 5 | 1 | 2 | 2 | 2 | 2 | 2 | 4.33 | 0.82 | -1.63 | -0.41 | 0.82  | 0.82  | -0.41 | 0.82  | 0.82  |
| chr9 | 39801     | 49800     | 3 | 4 | 5 | 5 | 4 | 5 | 1 | 2 | 2 | 2 | 2 | 2 | 4.33 | 0.82 | -1.63 | -0.41 | 0.82  | 0.82  | -0.41 | 0.82  | 0.82  |
| chr9 | 49801     | 59800     | 3 | 4 | 5 | 5 | 5 | 5 | 1 | 2 | 2 | 2 | 2 | 2 | 4.5  | 0.84 | -1.79 | -0.6  | 0.6   | 0.6   | 0.6   | 0.6   | 0.6   |
| chr9 | 59801     | 519800    | 3 | 5 | 5 | 5 | 5 | 5 | 1 | 2 | 2 | 2 | 2 | 2 | 4.67 | 0.82 | -2.04 | 0.41  | 0.41  | 0.41  | 0.41  | 0.41  | 0.41  |
| chr9 | 519801    | 1109800   | 3 | 5 | 5 | 5 | 5 | 5 | 1 | 2 | 2 | 2 | 2 | 2 | 4.67 | 0.82 | -2.04 | 0.41  | 0.41  | 0.41  | 0.41  | 0.41  | 0.41  |
| chr9 | 1109801   | 1119800   | 3 | 5 | 5 | 5 | 5 | 5 | 1 | 2 | 2 | 2 | 2 | 2 | 4.67 | 0.82 | -2.04 | 0.41  | 0.41  | 0.41  | 0.41  | 0.41  | 0.41  |
| chr9 | 1119801   | 1749800   | 3 | 5 | 5 | 5 | 5 | 5 | 1 | 2 | 2 | 2 | 2 | 2 | 4.67 | 0.82 | -2.04 | 0.41  | 0.41  | 0.41  | 0.41  | 0.41  | 0.41  |
| chr9 | 1749801   | 1759800   | 3 | 5 | 5 | 5 | 5 | 5 | 1 | 2 | 2 | 2 | 2 | 2 | 4.67 | 0.82 | -2.04 | 0.41  | 0.41  | 0.41  | 0.41  | 0.41  | 0.41  |
| chr9 | 1759801   | 1969800   | 3 | 5 | 5 | 5 | 5 | 5 | 1 | 2 | 2 | 2 | 2 | 2 | 4.67 | 0.82 | -2.04 | 0.41  | 0.41  | 0.41  | 0.41  | 0.41  | 0.41  |
| chr9 | 1969801   | 1979800   | 3 | 5 | 5 | 5 | 5 | 5 | 1 | 2 | 2 | 2 | 2 | 2 | 4.67 | 0.82 | -2.04 | 0.41  | 0.41  | 0.41  | 0.41  | 0.41  | 0.41  |
| chr9 | 1979801   | 19026200  | 3 | 5 | 5 | 5 | 5 | 5 | 1 | 2 | 2 | 2 | 2 | 2 | 4.67 | 0.82 | -2.04 | 0.41  | 0.41  | 0.41  | 0.41  | 0.41  | 0.41  |
| chr9 | 19026201  | 19036200  | 3 | 5 | 5 | 5 | 5 | 5 | 1 | 2 | 2 | 2 | 2 | 2 | 4.67 | 0.82 | -2.04 | 0.41  | 0.41  | 0.41  | 0.41  | 0.41  | 0.41  |
| chr9 | 19036201  | 19056400  | 3 | 5 | 5 | 5 | 5 | 5 | 1 | 2 | 2 | 2 | 2 | 2 | 4.67 | 0.82 | -2.04 | 0.41  | 0.41  | 0.41  | 0.41  | 0.41  | 0.41  |
| chr9 | 19056401  | 19066400  | 3 | 5 | 5 | 5 | 5 | 5 | 1 | 2 | 2 | 2 | 2 | 2 | 4.67 | 0.82 | -2.04 | 0.41  | 0.41  | 0.41  | 0.41  | 0.41  | 0.41  |
| chr9 | 19066401  | 19356200  | 3 | 5 | 5 | 5 | 5 | 5 | 1 | 2 | 2 | 2 | 2 | 2 | 4.67 | 0.82 | -2.04 | 0.41  | 0.41  | 0.41  | 0.41  | 0.41  | 0.41  |
| chr9 | 19356201  | 19366200  | 3 | 5 | 5 | 5 | 5 | 5 | 1 | 2 | 2 | 2 | 2 | 2 | 4.67 | 0.82 | -2.04 | 0.41  | 0.41  | 0.41  | 0.41  | 0.41  | 0.41  |
| chr9 | 19366201  | 19466400  | 3 | 5 | 5 | 5 | 5 | 5 | 1 | 2 | 2 | 2 | 2 | 2 | 4.67 | 0.82 | -2.04 | 0.41  | 0.41  | 0.41  | 0.41  | 0.41  | 0.41  |
| chr9 | 19466401  | 19476400  | 3 | 5 | 5 | 5 | 5 | 5 | 1 | 2 | 2 | 2 | 2 | 2 | 4.67 | 0.82 | -2.04 | 0.41  | 0.41  | 0.41  | 0.41  | 0.41  | 0.41  |
| chr9 | 19476401  | 25006200  | 3 | 5 | 5 | 5 | 5 | 5 | 1 | 2 | 2 | 2 | 2 | 2 | 4.67 | 0.82 | -2.04 | 0.41  | 0.41  | 0.41  | 0.41  | 0.41  | 0.41  |
| chr9 | 25006201  | 25016200  | 3 | 5 | 5 | 5 | 5 | 5 | 1 | 2 | 2 | 2 | 2 | 2 | 4.67 | 0.82 | -2.04 | 0.41  | 0.41  | 0.41  | 0.41  | 0.41  | 0.41  |
| chr9 | 25016201  | 25176200  | 3 | 5 | 5 | 5 | 4 | 5 | 1 | 2 | 2 | 2 | 1 | 2 | 4.5  | 0.84 | -1.79 | 0.6   | 0.6   | 0.6   | -0.6  | 0.6   | 0.6   |
| chr9 | 25176201  | 25186200  | 3 | 5 | 5 | 5 | 4 | 5 | 1 | 2 | 2 | 2 | 1 | 2 | 4.5  | 0.84 | -1.79 | 0.6   | 0.6   | 0.6   | -0.6  | 0.6   | 0.6   |
| chr9 | 25186201  | 28649800  | 3 | 5 | 5 | 5 | 5 | 5 | 1 | 2 | 2 | 2 | 2 | 2 | 4.67 | 0.82 | -2.04 | 0.41  | 0.41  | 0.41  | 0.41  | 0.41  | 0.41  |
| chr9 | 28649801  | 28659800  | 3 | 5 | 4 | 5 | 5 | 5 | 1 | 2 | 2 | 2 | 2 | 2 | 4.5  | 0.84 | -1.79 | 0.6   | -0.6  | 0.6   | 0.6   | 0.6   | 0.6   |
| chr9 | 28659801  | 28670000  | 3 | 5 | 4 | 5 | 4 | 5 | 1 | 2 | 2 | 2 | 2 | 2 | 4.33 | 0.82 | -1.63 | 0.82  | -0.41 | 0.82  | -0.41 | 0.82  | 0.82  |
| chr9 | 28670001  | 28680000  | 2 | 5 | 4 | 5 | 4 | 5 | 1 | 2 | 2 | 2 | 2 | 2 | 4.17 | 1.17 | -1.85 | 0.71  | -0.14 | 0.71  | -0.14 | 0.71  | 0.71  |
| chr9 | 28680001  | 28709400  | 2 | 3 | 4 | 5 | 4 | 4 | 1 | 1 | 2 | 2 | 2 | 2 | 3.67 | 1.03 | -1.61 | -0.65 | 0.32  | 1.29  | 0.32  | 0.32  | 0.32  |
| chr9 | 28709401  | 28719400  | 2 | 3 | 4 | 5 | 4 | 4 | 1 | 1 | 2 | 2 | 2 | 2 | 3.67 | 1.03 | -1.61 | -0.65 | 0.32  | 1.29  | 0.32  | 0.32  | 0.32  |
| chr9 | 28719401  | 28729600  | 2 | 3 | 5 | 5 | 5 | 4 | 1 | 1 | 2 | 2 | 2 | 2 | 4    | 1.26 | -1.58 | -0.79 | 0.79  | 0.79  | 0.79  | 0     | 0     |
| chr9 | 28729601  | 32349600  | 3 | 5 | 5 | 5 | 5 | 5 | 1 | 2 | 2 | 2 | 2 | 2 | 4.67 | 0.82 | -2.04 | 0.41  | 0.41  | 0.41  | 0.41  | 0.41  | 0.41  |
| chr9 | 32349601  | 32359600  | 3 | 5 | 5 | 5 | 5 | 5 | 1 | 2 | 2 | 2 | 2 | 2 | 4.67 | 0.82 | -2.04 | 0.41  | 0.41  | 0.41  | 0.41  | 0.41  | 0.41  |
| chr9 | 32359601  | 32389800  | 3 | 5 | 5 | 5 | 5 | 5 | 1 | 2 | 2 | 2 | 2 | 2 | 4.67 | 0.82 | -2.04 | 0.41  | 0.41  | 0.41  | 0.41  | 0.41  | 0.41  |
| chr9 | 32389801  | 32399800  | 3 | 5 | 5 | 5 | 5 | 5 | 1 | 2 | 2 | 2 | 2 | 2 | 4.67 | 0.82 | -2.04 | 0.41  | 0.41  | 0.41  | 0.41  | 0.41  | 0.41  |
| chr9 | 32399801  | 38480800  | 3 | 5 | 5 | 5 | 5 | 5 | 1 | 2 | 2 | 2 | 2 | 2 | 4.67 | 0.82 | -2.04 | 0.41  | 0.41  | 0.41  | 0.41  | 0.41  | 0.41  |
| chr9 | 38480801  | 38490800  | 3 | 5 | 5 | 5 | 5 | 5 | 1 | 2 | 2 | 2 | 2 | 2 | 4.67 | 0.82 | -2.04 | 0.41  | 0.41  | 0.41  | 0.41  | 0.41  | 0.41  |
| chr9 | 38490801  | 40062590  | 3 | 5 | 5 | 5 | 5 | 5 | 1 | 2 | 2 | 2 | 2 | 2 | 4.67 | 0.82 | -2.04 | 0.4   |       |       |       |       |       |

|      |           |           |   |   |   |   |   |   |   |   |   |   |   |   |      |      |       |       |       |       |       |       |       |
|------|-----------|-----------|---|---|---|---|---|---|---|---|---|---|---|---|------|------|-------|-------|-------|-------|-------|-------|-------|
| chr9 | 41456166  | 41466365  | 4 | 5 | 5 | 5 | 5 | 5 | 2 | 2 | 2 | 2 | 2 | 2 | 4.83 | 0.41 | -2.04 | 0.41  | 0.41  | 0.41  | 0.41  | 0.41  | 0.41  |
| chr9 | 41466366  | 43130765  | 3 | 5 | 5 | 5 | 5 | 5 | 1 | 2 | 2 | 2 | 2 | 2 | 4.67 | 0.82 | -2.04 | 0.41  | 0.41  | 0.41  | 0.41  | 0.41  | 0.41  |
| chr9 | 43130766  | 43140765  | 3 | 5 | 5 | 5 | 5 | 5 | 1 | 2 | 2 | 2 | 2 | 2 | 4.67 | 0.82 | -2.04 | 0.41  | 0.41  | 0.41  | 0.41  | 0.41  | 0.41  |
| chr9 | 43140766  | 43150765  | 3 | 5 | 5 | 5 | 5 | 5 | 1 | 2 | 2 | 2 | 2 | 2 | 4.67 | 0.82 | -2.04 | 0.41  | 0.41  | 0.41  | 0.41  | 0.41  | 0.41  |
| chr9 | 43150766  | 43160765  | 3 | 5 | 5 | 5 | 5 | 5 | 1 | 2 | 2 | 2 | 2 | 2 | 4.67 | 0.82 | -2.04 | 0.41  | 0.41  | 0.41  | 0.41  | 0.41  | 0.41  |
| chr9 | 43160766  | 43202765  | 3 | 5 | 5 | 5 | 5 | 5 | 1 | 2 | 2 | 2 | 2 | 2 | 4.67 | 0.82 | -2.04 | 0.41  | 0.41  | 0.41  | 0.41  | 0.41  | 0.41  |
| chr9 | 43202766  | 43212765  | 3 | 5 | 5 | 5 | 5 | 5 | 1 | 2 | 2 | 2 | 2 | 2 | 4.67 | 0.82 | -2.04 | 0.41  | 0.41  | 0.41  | 0.41  | 0.41  | 0.41  |
| chr9 | 43212766  | 44294155  | 3 | 5 | 5 | 5 | 5 | 5 | 1 | 2 | 2 | 2 | 2 | 2 | 4.67 | 0.82 | -2.04 | 0.41  | 0.41  | 0.41  | 0.41  | 0.41  | 0.41  |
| chr9 | 44294156  | 44304155  | 3 | 5 | 5 | 5 | 5 | 5 | 1 | 2 | 2 | 2 | 2 | 2 | 4.67 | 0.82 | -2.04 | 0.41  | 0.41  | 0.41  | 0.41  | 0.41  | 0.41  |
| chr9 | 44304156  | 44585355  | 3 | 5 | 5 | 5 | 5 | 5 | 1 | 2 | 2 | 2 | 2 | 2 | 4.67 | 0.82 | -2.04 | 0.41  | 0.41  | 0.41  | 0.41  | 0.41  | 0.41  |
| chr9 | 44585356  | 44595355  | 3 | 5 | 5 | 5 | 5 | 5 | 1 | 2 | 2 | 2 | 2 | 2 | 4.67 | 0.82 | -2.04 | 0.41  | 0.41  | 0.41  | 0.41  | 0.41  | 0.41  |
| chr9 | 44595356  | 44674155  | 3 | 5 | 5 | 5 | 5 | 6 | 1 | 2 | 2 | 2 | 2 | 2 | 4.83 | 0.98 | -1.86 | 0.17  | 0.17  | 0.17  | 0.17  | 0.17  | 1.19  |
| chr9 | 44674156  | 44734350  | 3 | 5 | 5 | 4 | 5 | 6 | 1 | 2 | 2 | 1 | 2 | 2 | 4.67 | 1.03 | -1.61 | 0.32  | 0.32  | -0.65 | 0.32  | 1.29  | 1.29  |
| chr9 | 44734351  | 44844350  | 2 | 3 | 5 | 4 | 4 | 4 | 1 | 1 | 2 | 1 | 2 | 2 | 3.67 | 1.03 | -1.61 | -0.65 | 1.29  | 0.32  | 0.32  | 0.32  | 0.32  |
| chr9 | 44844351  | 44854350  | 2 | 3 | 5 | 4 | 4 | 4 | 1 | 1 | 2 | 1 | 2 | 2 | 3.67 | 1.03 | -1.61 | -0.65 | 1.29  | 0.32  | 0.32  | 0.32  | 0.32  |
| chr9 | 44854351  | 44865550  | 3 | 5 | 5 | 4 | 5 | 4 | 1 | 2 | 2 | 1 | 2 | 2 | 4.33 | 0.82 | -1.63 | 0.82  | 0.82  | -0.41 | 0.82  | -0.41 | -0.41 |
| chr9 | 44865551  | 45026145  | 3 | 5 | 5 | 4 | 5 | 5 | 1 | 2 | 2 | 1 | 2 | 2 | 4.5  | 0.84 | -1.79 | 0.6   | 0.6   | -0.6  | 0.6   | 0.6   | 0.6   |
| chr9 | 45026146  | 45036145  | 3 | 5 | 5 | 4 | 5 | 5 | 1 | 2 | 2 | 1 | 2 | 2 | 4.5  | 0.84 | -1.79 | 0.6   | 0.6   | -0.6  | 0.6   | 0.6   | 0.6   |
| chr9 | 45036146  | 45165745  | 3 | 5 | 5 | 5 | 5 | 5 | 1 | 2 | 2 | 1 | 2 | 2 | 4.67 | 0.82 | -2.04 | 0.41  | 0.41  | 0.41  | 0.41  | 0.41  | 0.41  |
| chr9 | 45165746  | 45175745  | 3 | 5 | 5 | 5 | 5 | 5 | 1 | 2 | 2 | 1 | 2 | 2 | 4.67 | 0.82 | -2.04 | 0.41  | 0.41  | 0.41  | 0.41  | 0.41  | 0.41  |
| chr9 | 45175746  | 47286525  | 3 | 5 | 5 | 5 | 5 | 5 | 1 | 2 | 2 | 1 | 2 | 2 | 4.67 | 0.82 | -2.04 | 0.41  | 0.41  | 0.41  | 0.41  | 0.41  | 0.41  |
| chr9 | 47286526  | 65478320  | 3 | 5 | 5 | 5 | 5 | 5 | 1 | 2 | 2 | 1 | 2 | 2 | 4.67 | 0.82 | -2.04 | 0.41  | 0.41  | 0.41  | 0.41  | 0.41  | 0.41  |
| chr9 | 65478321  | 65618920  | 3 | 6 | 5 | 5 | 5 | 5 | 1 | 3 | 2 | 2 | 1 | 1 | 4.83 | 0.98 | -1.86 | 1.19  | 0.17  | 0.17  | 0.17  | 0.17  | 0.17  |
| chr9 | 65618921  | 65628920  | 3 | 6 | 5 | 5 | 5 | 5 | 1 | 3 | 2 | 2 | 1 | 1 | 4.83 | 0.98 | -1.86 | 1.19  | 0.17  | 0.17  | 0.17  | 0.17  | 0.17  |
| chr9 | 65628921  | 65649120  | 3 | 5 | 5 | 5 | 5 | 5 | 1 | 2 | 2 | 2 | 1 | 1 | 4.67 | 0.82 | -2.04 | 0.41  | 0.41  | 0.41  | 0.41  | 0.41  | 0.41  |
| chr9 | 65649121  | 65659120  | 3 | 5 | 5 | 5 | 5 | 5 | 1 | 2 | 2 | 2 | 1 | 1 | 4.67 | 0.82 | -2.04 | 0.41  | 0.41  | 0.41  | 0.41  | 0.41  | 0.41  |
| chr9 | 65659121  | 86177670  | 3 | 5 | 5 | 5 | 5 | 5 | 1 | 2 | 2 | 2 | 2 | 2 | 4.67 | 0.82 | -2.04 | 0.41  | 0.41  | 0.41  | 0.41  | 0.41  | 0.41  |
| chr9 | 86177671  | 86187670  | 3 | 5 | 5 | 5 | 5 | 5 | 1 | 2 | 2 | 2 | 2 | 2 | 4.67 | 0.82 | -2.04 | 0.41  | 0.41  | 0.41  | 0.41  | 0.41  | 0.41  |
| chr9 | 86187671  | 86617670  | 3 | 5 | 5 | 5 | 5 | 5 | 1 | 2 | 2 | 2 | 2 | 2 | 4.67 | 0.82 | -2.04 | 0.41  | 0.41  | 0.41  | 0.41  | 0.41  | 0.41  |
| chr9 | 86617671  | 86627670  | 3 | 5 | 5 | 5 | 5 | 5 | 1 | 2 | 2 | 2 | 2 | 2 | 4.67 | 0.82 | -2.04 | 0.41  | 0.41  | 0.41  | 0.41  | 0.41  | 0.41  |
| chr9 | 86627671  | 91818870  | 3 | 5 | 5 | 5 | 5 | 5 | 1 | 2 | 2 | 2 | 2 | 2 | 4.67 | 0.82 | -2.04 | 0.41  | 0.41  | 0.41  | 0.41  | 0.41  | 0.41  |
| chr9 | 91818871  | 91828870  | 3 | 5 | 5 | 5 | 5 | 5 | 1 | 2 | 2 | 2 | 2 | 2 | 4.67 | 0.82 | -2.04 | 0.41  | 0.41  | 0.41  | 0.41  | 0.41  | 0.41  |
| chr9 | 91828871  | 92959260  | 3 | 5 | 5 | 5 | 5 | 5 | 1 | 2 | 2 | 2 | 2 | 2 | 4.67 | 0.82 | -2.04 | 0.41  | 0.41  | 0.41  | 0.41  | 0.41  | 0.41  |
| chr9 | 92959261  | 92969260  | 3 | 5 | 5 | 5 | 5 | 5 | 1 | 2 | 2 | 2 | 2 | 2 | 4.67 | 0.82 | -2.04 | 0.41  | 0.41  | 0.41  | 0.41  | 0.41  | 0.41  |
| chr9 | 92969261  | 93529260  | 3 | 5 | 5 | 5 | 5 | 5 | 1 | 2 | 2 | 2 | 2 | 2 | 4.67 | 0.82 | -2.04 | 0.41  | 0.41  | 0.41  | 0.41  | 0.41  | 0.41  |
| chr9 | 93529261  | 93539260  | 3 | 5 | 5 | 5 | 5 | 5 | 1 | 2 | 2 | 2 | 2 | 2 | 4.67 | 0.82 | -2.04 | 0.41  | 0.41  | 0.41  | 0.41  | 0.41  | 0.41  |
| chr9 | 93539261  | 97009260  | 3 | 5 | 5 | 5 | 5 | 5 | 1 | 2 | 2 | 2 | 2 | 2 | 4.67 | 0.82 | -2.04 | 0.41  | 0.41  | 0.41  | 0.41  | 0.41  | 0.41  |
| chr9 | 97009261  | 97019260  | 3 | 5 | 5 | 5 | 5 | 5 | 1 | 2 | 2 | 2 | 2 | 2 | 4.67 | 0.82 | -2.04 | 0.41  | 0.41  | 0.41  | 0.41  | 0.41  | 0.41  |
| chr9 | 97019261  | 97109260  | 3 | 5 | 5 | 5 | 4 | 5 | 1 | 2 | 2 | 2 | 2 | 2 | 4.5  | 0.84 | -1.79 | 0.6   | 0.6   | 0.6   | -0.6  | 0.6   | 0.6   |
| chr9 | 97109261  | 97119260  | 3 | 5 | 5 | 5 | 4 | 5 | 1 | 2 | 2 | 2 | 2 | 2 | 4.5  | 0.84 | -1.79 | 0.6   | 0.6   | 0.6   | -0.6  | 0.6   | 0.6   |
| chr9 | 97119261  | 104079260 | 3 | 5 | 5 | 5 | 5 | 5 | 1 | 2 | 2 | 2 | 2 | 2 | 4.67 | 0.82 | -2.04 | 0.41  | 0.41  | 0.41  | 0.41  | 0.41  | 0.41  |
| chr9 | 104079261 | 104089260 | 3 | 5 | 5 | 5 | 5 | 5 | 1 | 2 | 2 | 2 | 2 | 2 | 4.67 | 0.82 | -2.04 | 0.41  | 0.41  | 0.41  | 0.41  | 0.41  | 0.41  |
| chr9 | 104089261 | 104199260 | 3 | 5 | 5 | 5 | 5 | 5 | 1 | 2 | 2 | 2 | 2 | 2 | 4.67 | 0.82 | -2.04 | 0.41  | 0.41  | 0.41  | 0.41  | 0.41  | 0.41  |
| chr9 | 104199261 | 104209260 | 3 | 5 | 5 | 5 | 5 | 5 | 1 | 2 | 2 | 2 | 2 | 2 | 4.67 | 0.82 | -2.04 | 0.41  | 0.41  | 0.41  | 0.41  | 0.41  | 0.41  |
| chr9 | 104209261 | 107949260 | 3 | 5 | 5 | 5 | 5 | 5 | 1 | 2 | 2 | 2 | 2 | 2 | 4.67 | 0.82 | -2.04 | 0.41  | 0.41  | 0.41  | 0.41  | 0.41  | 0.41  |
| chr9 | 107949261 | 107959260 | 3 | 5 | 5 | 5 | 5 | 5 | 1 | 2 | 2 | 2 | 2 | 2 | 4.67 | 0.82 | -2.04 | 0.41  | 0.41  | 0.41  | 0.41  | 0.41  | 0.41  |
| chr9 | 107959261 | 108529260 | 3 | 5 | 5 | 5 | 5 | 5 | 1 | 2 | 2 | 2 | 2 | 2 | 4.67 | 0.82 | -2.04 | 0.41  | 0.41  | 0.41  | 0.41  | 0.41  | 0.41  |
| chr9 | 108529261 | 108539260 | 3 | 5 | 5 | 5 | 5 | 5 | 1 | 2 | 2 | 2 | 2 | 2 | 4.67 | 0.82 | -2.04 | 0.41  | 0.41  | 0.41  | 0.41  | 0.41  | 0.41  |
| chr9 | 108539261 | 111508860 | 3 | 5 | 5 | 5 | 5 | 5 | 1 | 2 | 2 | 2 | 2 | 2 | 4.67 | 0.82 | -2.04 | 0.41  | 0.41  | 0.41  | 0.41  | 0.41  | 0.41  |
| chr9 | 111508861 | 111518860 | 3 | 5 | 5 | 5 | 5 | 5 | 1 | 2 | 2 | 2 | 2 | 2 | 4.67 | 0.82 | -2.04 | 0.41  | 0.41  | 0.41  | 0.41  | 0.41  | 0.41  |
| chr9 | 111518861 | 111529260 | 3 | 6 | 5 | 6 | 5 | 6 | 1 | 3 | 2 | 3 | 2 | 3 | 5.17 | 1.17 | -1.85 | 0.71  | -0.14 | 0.71  | -0.14 | 0.71  | 0.71  |
| chr9 | 111529261 | 112139660 | 3 | 6 | 6 | 6 | 6 | 6 | 1 | 3 | 3 | 3 | 3 | 3 | 5.5  | 1.22 | -2.04 | 0.41  | 0.41  | 0.41  | 0.41  | 0.41  | 0.41  |
| chr9 | 112139661 | 112149660 | 3 | 6 | 5 | 6 | 6 | 6 | 1 | 3 | 2 | 3 | 3 | 3 | 5.33 | 1.21 | -1.93 | 0.55  | -0.28 | 0.55  | 0.55  | 0.55  | 0.55  |
| chr9 | 112149661 | 112159860 | 3 | 5 | 5 | 6 | 5 | 5 | 1 | 2 | 2 | 3 | 2 | 2 | 4.83 | 0.98 | -1.86 | 0.17  | 0.17  | 1.19  | 0.17  | 0.17  | 0.17  |
| chr9 | 112159861 | 113419260 | 3 | 5 | 5 | 5 | 5 | 5 | 1 | 2 | 2 | 2 | 2 | 2 | 4.67 | 0.82 | -2.04 | 0.41  | 0.41  | 0.41  | 0.41  | 0.41  | 0.41  |
| chr9 | 113419261 | 113429260 | 3 | 5 | 5 | 5 | 5 | 5 | 1 | 2 | 2 | 2 | 2 | 2 | 4.67 | 0.82 | -2.04 | 0.41  | 0.41  | 0.41  | 0.41  | 0.41  | 0.41  |
| chr9 | 113429261 | 113469260 | 3 | 5 | 5 | 5 | 4 | 5 | 1 | 2 | 2 | 2 | 2 | 2 | 4.5  | 0.84 | -1.79 | 0.6   | 0.6   | 0.6   | -0.6  | 0.6   | 0.6   |
| chr9 | 113469261 | 113479260 | 3 | 5 | 5 | 5 | 4 | 5 | 1 | 2 | 2 | 2 | 2 | 2 | 4.5  | 0.84 | -1.79 | 0.6   | 0.6   | 0.6   | -0.6  | 0.6   | 0.6   |
| chr9 | 113479261 | 114079260 | 3 | 5 | 5 | 5 | 5 | 5 | 1 | 2 | 2 | 2 | 2 | 2 | 4.67 | 0.82 | -2.04 | 0.41  | 0.41  | 0.41  | 0.41  | 0.41  | 0.41  |
| chr9 | 114079261 | 114089260 | 3 | 5 | 5 | 5 | 5 | 5 | 1 | 2 | 2 | 2 | 2 | 2 | 4.67 | 0.82 | -2.04 | 0.41  | 0.41  | 0.41  | 0.41  | 0.41  | 0.41  |
| chr9 | 114089261 | 117669460 | 3 | 5 | 5 | 5 | 5 | 5 | 1 | 2 | 2 | 2 | 2 | 2 | 4.67 | 0.82 | -2.04 | 0.41  | 0.41  | 0.41  | 0.41  | 0.41  | 0.41  |
| chr9 | 117669461 | 117679460 | 3 | 5 | 5 | 5 | 5 | 5 | 1 | 2 | 2 | 2 | 2 | 2 | 4.67 | 0.82 | -2.04 | 0.41  | 0.41  | 0.41  | 0.41  | 0.41  | 0.41  |
| chr9 | 117679461 | 120109460 | 3 | 5 | 5 | 5 | 5 | 5 | 1 | 2 | 2 | 2 | 2 | 2 | 4.67 | 0.82 | -2.04 | 0.41  | 0.41  | 0.41  | 0.41  | 0.41  | 0.41  |
| chr9 | 120109461 | 120119460 | 3 | 5 | 5 | 5 | 5 | 5 | 1 | 2 | 2 | 2 | 2 | 2 | 4.67 | 0.82 | -2.04 | 0.41  | 0.41  | 0.41  | 0.41  | 0.41  | 0.41  |
| chr9 | 120119461 | 120459460 | 3 | 5 | 5 | 5 | 5 | 5 | 1 | 2 | 2 | 2 | 2 | 2 | 4.67 | 0.82 |       |       |       |       |       |       |       |

|       |           |           |   |   |   |   |   |   |   |   |   |   |   |   |      |      |       |      |       |       |      |       |
|-------|-----------|-----------|---|---|---|---|---|---|---|---|---|---|---|---|------|------|-------|------|-------|-------|------|-------|
| chr10 | 6343601   | 6353600   | 3 | 5 | 5 | 5 | 5 | 5 | 1 | 2 | 2 | 2 | 2 | 2 | 4.67 | 0.82 | -2.04 | 0.41 | 0.41  | 0.41  | 0.41 | 0.41  |
| chr10 | 6353601   | 7593600   | 3 | 5 | 5 | 5 | 5 | 5 | 1 | 2 | 2 | 2 | 2 | 2 | 4.67 | 0.82 | -2.04 | 0.41 | 0.41  | 0.41  | 0.41 | 0.41  |
| chr10 | 7593601   | 7603600   | 3 | 5 | 5 | 5 | 5 | 5 | 1 | 2 | 2 | 2 | 2 | 2 | 4.67 | 0.82 | -2.04 | 0.41 | 0.41  | 0.41  | 0.41 | 0.41  |
| chr10 | 7603601   | 8023600   | 3 | 5 | 5 | 5 | 5 | 5 | 1 | 2 | 2 | 2 | 2 | 2 | 4.67 | 0.82 | -2.04 | 0.41 | 0.41  | 0.41  | 0.41 | 0.41  |
| chr10 | 8023601   | 8033600   | 3 | 5 | 5 | 5 | 5 | 5 | 1 | 2 | 2 | 2 | 2 | 2 | 4.67 | 0.82 | -2.04 | 0.41 | 0.41  | 0.41  | 0.41 | 0.41  |
| chr10 | 8033601   | 11433600  | 3 | 5 | 5 | 5 | 5 | 5 | 1 | 2 | 2 | 2 | 2 | 2 | 4.67 | 0.82 | -2.04 | 0.41 | 0.41  | 0.41  | 0.41 | 0.41  |
| chr10 | 11433601  | 11443600  | 3 | 5 | 5 | 5 | 5 | 5 | 1 | 2 | 2 | 2 | 2 | 2 | 4.67 | 0.82 | -2.04 | 0.41 | 0.41  | 0.41  | 0.41 | 0.41  |
| chr10 | 11443601  | 12253600  | 3 | 5 | 5 | 5 | 5 | 5 | 1 | 2 | 2 | 2 | 2 | 2 | 4.67 | 0.82 | -2.04 | 0.41 | 0.41  | 0.41  | 0.41 | 0.41  |
| chr10 | 12253601  | 12263600  | 3 | 5 | 5 | 5 | 5 | 5 | 1 | 2 | 2 | 2 | 2 | 2 | 4.67 | 0.82 | -2.04 | 0.41 | 0.41  | 0.41  | 0.41 | 0.41  |
| chr10 | 12263601  | 19344000  | 3 | 5 | 5 | 5 | 5 | 5 | 1 | 2 | 2 | 2 | 2 | 2 | 4.67 | 0.82 | -2.04 | 0.41 | 0.41  | 0.41  | 0.41 | 0.41  |
| chr10 | 19344001  | 19354000  | 3 | 5 | 5 | 5 | 5 | 5 | 1 | 2 | 2 | 2 | 2 | 2 | 4.67 | 0.82 | -2.04 | 0.41 | 0.41  | 0.41  | 0.41 | 0.41  |
| chr10 | 19354001  | 20044000  | 3 | 5 | 5 | 5 | 5 | 5 | 1 | 2 | 2 | 2 | 2 | 2 | 4.67 | 0.82 | -2.04 | 0.41 | 0.41  | 0.41  | 0.41 | 0.41  |
| chr10 | 20044001  | 20054000  | 3 | 5 | 5 | 5 | 5 | 5 | 1 | 2 | 2 | 2 | 2 | 2 | 4.67 | 0.82 | -2.04 | 0.41 | 0.41  | 0.41  | 0.41 | 0.41  |
| chr10 | 20054001  | 37744200  | 3 | 5 | 5 | 5 | 5 | 5 | 1 | 2 | 2 | 2 | 2 | 2 | 4.67 | 0.82 | -2.04 | 0.41 | 0.41  | 0.41  | 0.41 | 0.41  |
| chr10 | 37744201  | 37754200  | 3 | 5 | 5 | 5 | 5 | 5 | 1 | 2 | 2 | 2 | 2 | 2 | 4.67 | 0.82 | -2.04 | 0.41 | 0.41  | 0.41  | 0.41 | 0.41  |
| chr10 | 37754201  | 37804200  | 3 | 5 | 5 | 5 | 4 | 5 | 1 | 2 | 2 | 2 | 2 | 2 | 4.5  | 0.84 | -1.79 | 0.6  | 0.6   | 0.6   | -0.6 | 0.6   |
| chr10 | 37804201  | 37814200  | 3 | 5 | 5 | 5 | 4 | 5 | 1 | 2 | 2 | 2 | 2 | 2 | 4.5  | 0.84 | -1.79 | 0.6  | 0.6   | 0.6   | -0.6 | 0.6   |
| chr10 | 37814201  | 37984200  | 3 | 5 | 5 | 5 | 5 | 5 | 1 | 2 | 2 | 2 | 2 | 2 | 4.67 | 0.82 | -2.04 | 0.41 | 0.41  | 0.41  | 0.41 | 0.41  |
| chr10 | 37984201  | 42365000  | 3 | 5 | 5 | 5 | 5 | 5 | 1 | 2 | 2 | 2 | 2 | 2 | 4.67 | 0.82 | -2.04 | 0.41 | 0.41  | 0.41  | 0.41 | 0.41  |
| chr10 | 42365001  | 46836590  | 3 | 5 | 5 | 5 | 5 | 5 | 1 | 2 | 2 | 2 | 2 | 2 | 4.67 | 0.82 | -2.04 | 0.41 | 0.41  | 0.41  | 0.41 | 0.41  |
| chr10 | 46836591  | 46890590  | 3 | 4 | 5 | 5 | 5 | 5 | 1 | 2 | 2 | 2 | 2 | 2 | 4.5  | 0.84 | -1.79 | -0.6 | 0.6   | 0.6   | 0.6  | 0.6   |
| chr10 | 46890591  | 46900590  | 3 | 4 | 5 | 5 | 5 | 5 | 1 | 2 | 2 | 2 | 2 | 2 | 4.5  | 0.84 | -1.79 | -0.6 | 0.6   | 0.6   | 0.6  | 0.6   |
| chr10 | 46900591  | 47189790  | 3 | 5 | 5 | 5 | 5 | 5 | 1 | 2 | 2 | 2 | 2 | 2 | 4.67 | 0.82 | -2.04 | 0.41 | 0.41  | 0.41  | 0.41 | 0.41  |
| chr10 | 47189791  | 47199790  | 3 | 5 | 5 | 5 | 5 | 6 | 1 | 2 | 2 | 2 | 2 | 2 | 4.83 | 0.98 | -1.86 | 0.17 | 0.17  | 0.17  | 0.17 | 1.19  |
| chr10 | 47199791  | 47240790  | 3 | 5 | 5 | 5 | 6 | 6 | 1 | 2 | 2 | 2 | 2 | 2 | 5    | 1.1  | -1.83 | 0    | 0     | 0     | 0.91 | 0.91  |
| chr10 | 47240791  | 47250790  | 3 | 5 | 5 | 5 | 6 | 6 | 1 | 2 | 2 | 2 | 2 | 2 | 5    | 1.1  | -1.83 | 0    | 0     | 0     | 0.91 | 0.91  |
| chr10 | 47250791  | 47329590  | 3 | 6 | 5 | 5 | 6 | 6 | 1 | 2 | 2 | 2 | 2 | 2 | 5.17 | 1.17 | -1.85 | 0.71 | -0.14 | -0.14 | 0.71 | 0.71  |
| chr10 | 47329591  | 47339590  | 3 | 6 | 5 | 5 | 6 | 6 | 1 | 2 | 2 | 2 | 2 | 2 | 5.17 | 1.17 | -1.85 | 0.71 | -0.14 | -0.14 | 0.71 | 0.71  |
| chr10 | 47339591  | 72751770  | 3 | 5 | 5 | 5 | 5 | 5 | 1 | 2 | 2 | 2 | 2 | 2 | 4.67 | 0.82 | -2.04 | 0.41 | 0.41  | 0.41  | 0.41 | 0.41  |
| chr10 | 72751771  | 72761770  | 3 | 5 | 5 | 5 | 5 | 5 | 1 | 2 | 2 | 2 | 2 | 2 | 4.67 | 0.82 | -2.04 | 0.41 | 0.41  | 0.41  | 0.41 | 0.41  |
| chr10 | 72761771  | 72841770  | 3 | 5 | 5 | 5 | 5 | 5 | 1 | 2 | 2 | 2 | 2 | 2 | 4.67 | 0.82 | -2.04 | 0.41 | 0.41  | 0.41  | 0.41 | 0.41  |
| chr10 | 72841771  | 72851770  | 3 | 5 | 5 | 5 | 5 | 5 | 1 | 2 | 2 | 2 | 2 | 2 | 4.67 | 0.82 | -2.04 | 0.41 | 0.41  | 0.41  | 0.41 | 0.41  |
| chr10 | 72851771  | 78321770  | 3 | 5 | 5 | 5 | 5 | 5 | 1 | 2 | 2 | 2 | 2 | 2 | 4.67 | 0.82 | -2.04 | 0.41 | 0.41  | 0.41  | 0.41 | 0.41  |
| chr10 | 78321771  | 78331770  | 3 | 5 | 5 | 5 | 5 | 5 | 1 | 2 | 2 | 2 | 2 | 2 | 4.67 | 0.82 | -2.04 | 0.41 | 0.41  | 0.41  | 0.41 | 0.41  |
| chr10 | 78331771  | 78701770  | 3 | 5 | 5 | 5 | 5 | 5 | 1 | 2 | 2 | 2 | 2 | 2 | 4.67 | 0.82 | -2.04 | 0.41 | 0.41  | 0.41  | 0.41 | 0.41  |
| chr10 | 78701771  | 78711770  | 3 | 5 | 5 | 5 | 5 | 5 | 1 | 2 | 2 | 2 | 2 | 2 | 4.67 | 0.82 | -2.04 | 0.41 | 0.41  | 0.41  | 0.41 | 0.41  |
| chr10 | 78711771  | 82631770  | 3 | 5 | 5 | 5 | 5 | 5 | 1 | 2 | 2 | 2 | 2 | 2 | 4.67 | 0.82 | -2.04 | 0.41 | 0.41  | 0.41  | 0.41 | 0.41  |
| chr10 | 82631771  | 82641770  | 3 | 5 | 5 | 5 | 5 | 5 | 1 | 2 | 2 | 2 | 2 | 2 | 4.67 | 0.82 | -2.04 | 0.41 | 0.41  | 0.41  | 0.41 | 0.41  |
| chr10 | 82641771  | 87821770  | 3 | 5 | 5 | 5 | 5 | 5 | 1 | 2 | 2 | 2 | 2 | 2 | 4.67 | 0.82 | -2.04 | 0.41 | 0.41  | 0.41  | 0.41 | 0.41  |
| chr10 | 87821771  | 87831770  | 3 | 5 | 5 | 5 | 5 | 5 | 1 | 2 | 2 | 2 | 2 | 2 | 4.67 | 0.82 | -2.04 | 0.41 | 0.41  | 0.41  | 0.41 | 0.41  |
| chr10 | 87831771  | 101746770 | 3 | 5 | 5 | 5 | 5 | 5 | 1 | 2 | 2 | 2 | 2 | 2 | 4.67 | 0.82 | -2.04 | 0.41 | 0.41  | 0.41  | 0.41 | 0.41  |
| chr10 | 101746771 | 101756770 | 3 | 5 | 5 | 5 | 5 | 5 | 1 | 2 | 2 | 2 | 2 | 2 | 4.67 | 0.82 | -2.04 | 0.41 | 0.41  | 0.41  | 0.41 | 0.41  |
| chr10 | 101756771 | 102196770 | 3 | 5 | 5 | 5 | 5 | 5 | 1 | 2 | 2 | 2 | 2 | 2 | 4.67 | 0.82 | -2.04 | 0.41 | 0.41  | 0.41  | 0.41 | 0.41  |
| chr10 | 102196771 | 102206770 | 3 | 5 | 5 | 5 | 5 | 5 | 1 | 2 | 2 | 2 | 2 | 2 | 4.67 | 0.82 | -2.04 | 0.41 | 0.41  | 0.41  | 0.41 | 0.41  |
| chr10 | 102206771 | 106214170 | 3 | 5 | 5 | 5 | 5 | 5 | 1 | 2 | 2 | 2 | 2 | 2 | 4.67 | 0.82 | -2.04 | 0.41 | 0.41  | 0.41  | 0.41 | 0.41  |
| chr10 | 106214171 | 106224170 | 3 | 5 | 5 | 5 | 5 | 5 | 1 | 2 | 2 | 2 | 2 | 2 | 4.67 | 0.82 | -2.04 | 0.41 | 0.41  | 0.41  | 0.41 | 0.41  |
| chr10 | 106224171 | 109786570 | 3 | 5 | 5 | 5 | 5 | 5 | 1 | 2 | 2 | 2 | 2 | 2 | 4.67 | 0.82 | -2.04 | 0.41 | 0.41  | 0.41  | 0.41 | 0.41  |
| chr10 | 109786571 | 109796570 | 3 | 5 | 5 | 5 | 5 | 5 | 1 | 2 | 2 | 2 | 2 | 2 | 4.67 | 0.82 | -2.04 | 0.41 | 0.41  | 0.41  | 0.41 | 0.41  |
| chr10 | 109796571 | 109886570 | 3 | 5 | 5 | 5 | 4 | 5 | 1 | 2 | 2 | 2 | 2 | 2 | 4.5  | 0.84 | -1.79 | 0.6  | 0.6   | 0.6   | -0.6 | 0.6   |
| chr10 | 109886571 | 109896570 | 3 | 5 | 5 | 5 | 4 | 5 | 1 | 2 | 2 | 2 | 2 | 2 | 4.5  | 0.84 | -1.79 | 0.6  | 0.6   | 0.6   | -0.6 | 0.6   |
| chr10 | 109896571 | 126338965 | 3 | 5 | 5 | 5 | 5 | 5 | 1 | 2 | 2 | 2 | 2 | 2 | 4.67 | 0.82 | -2.04 | 0.41 | 0.41  | 0.41  | 0.41 | 0.41  |
| chr10 | 126338966 | 126348965 | 3 | 5 | 5 | 5 | 5 | 5 | 1 | 2 | 2 | 2 | 2 | 2 | 4.67 | 0.82 | -2.04 | 0.41 | 0.41  | 0.41  | 0.41 | 0.41  |
| chr10 | 126348966 | 126678965 | 3 | 5 | 5 | 5 | 5 | 5 | 1 | 2 | 2 | 2 | 2 | 2 | 4.67 | 0.82 | -2.04 | 0.41 | 0.41  | 0.41  | 0.41 | 0.41  |
| chr10 | 126678966 | 126688965 | 3 | 5 | 5 | 5 | 5 | 5 | 1 | 2 | 2 | 2 | 2 | 2 | 4.67 | 0.82 | -2.04 | 0.41 | 0.41  | 0.41  | 0.41 | 0.41  |
| chr10 | 126688966 | 132119160 | 3 | 5 | 5 | 5 | 5 | 5 | 1 | 2 | 2 | 2 | 2 | 2 | 4.67 | 0.82 | -2.04 | 0.41 | 0.41  | 0.41  | 0.41 | 0.41  |
| chr10 | 132119161 | 132129160 | 3 | 5 | 5 | 5 | 5 | 5 | 1 | 2 | 2 | 2 | 2 | 2 | 4.67 | 0.82 | -2.04 | 0.41 | 0.41  | 0.41  | 0.41 | 0.41  |
| chr10 | 132129161 | 132949160 | 3 | 5 | 5 | 5 | 5 | 5 | 1 | 2 | 2 | 2 | 2 | 2 | 4.67 | 0.82 | -2.04 | 0.41 | 0.41  | 0.41  | 0.41 | 0.41  |
| chr10 | 132949161 | 132959160 | 3 | 5 | 5 | 5 | 5 | 5 | 1 | 2 | 2 | 2 | 2 | 2 | 4.67 | 0.82 | -2.04 | 0.41 | 0.41  | 0.41  | 0.41 | 0.41  |
| chr10 | 132959161 | 135510550 | 3 | 5 | 5 | 5 | 5 | 5 | 1 | 2 | 2 | 2 | 2 | 2 | 4.67 | 0.82 | -2.04 | 0.41 | 0.41  | 0.41  | 0.41 | 0.41  |
| chr11 | 69801     | 139800    | 4 | 6 | 5 | 5 | 5 | 5 | 2 | 2 | 1 | 2 | 1 | 2 | 5    | 0.63 | -1.58 | 1.58 | 0     | 0     | 0    | 0     |
| chr11 | 139801    | 149800    | 4 | 6 | 5 | 5 | 5 | 5 | 2 | 2 | 1 | 2 | 1 | 2 | 5    | 0.63 | -1.58 | 1.58 | 0     | 0     | 0    | 0     |
| chr11 | 149801    | 169800    | 4 | 6 | 5 | 6 | 6 | 6 | 5 | 2 | 2 | 1 | 2 | 2 | 5.33 | 0.82 | -1.63 | 0.82 | -0.41 | 0.82  | 0.82 | -0.41 |
| chr11 | 169801    | 199800    | 4 | 6 | 6 | 6 | 6 | 6 | 2 | 2 | 1 | 2 | 2 | 2 | 5.67 | 0.82 | -2.04 | 0.41 | 0.41  | 0.41  | 0.41 | 0.41  |
| chr11 | 199801    | 1720595   | 3 | 6 | 6 | 6 | 6 | 6 | 1 | 2 | 1 | 2 | 2 | 2 | 5.5  | 1.22 | -2.04 | 0.41 | 0.41  | 0.41  | 0.41 | 0.41  |
| chr11 | 1720596   | 1730595   | 3 | 7 | 6 | 6 | 6 | 6 | 1 | 3 | 1 | 2 | 2 | 2 | 5.67 | 1.37 | -1.95 | 0.98 | 0.24  | 0.24  | 0.24 | 0.24  |
| chr11 | 1730596   | 1740795   | 3 | 7 | 8 | 6 | 8 | 8 | 1 | 3 | 3 | 2 | 3 | 3 | 6.67 | 1.97 | -1.86 | 0.17 | 0.68  | -0.34 | 0.68 | 0.68  |
| chr11 | 1740796   | 2170395   | 3 | 7 | 8 | 8 | 8 | 8 | 1 | 3 | 3 | 3 | 3 | 3 | 7    | 2    | -2    | 0    | 0.5   | 0.5   | 0.5  | 0.5   |
| chr11 | 2170396   | 2180395   | 3 | 7 | 8 | 8 | 8 | 8 | 1 | 3 | 3 | 3 | 3 | 3 | 7    | 2    | -2    | 0    | 0.5   | 0.5   | 0.5  | 0.5   |
| chr11 | 2180396   | 2190595   | 3 |   |   |   |   |   |   |   |   |   |   |   |      |      |       |      |       |       |      |       |

|       |          |          |   |   |   |   |   |   |   |   |   |   |   |   |      |      |       |       |       |       |       |       |   |
|-------|----------|----------|---|---|---|---|---|---|---|---|---|---|---|---|------|------|-------|-------|-------|-------|-------|-------|---|
| chr11 | 4335796  | 6466995  | 3 | 5 | 6 | 6 | 6 | 6 | 0 | 2 | 2 | 2 | 2 | 2 | 5.33 | 1.21 | -1.93 | -0.28 | 0.55  | 0.55  | 0.55  | 0.55  |   |
| chr11 | 6466996  | 6476995  | 3 | 5 | 6 | 6 | 6 | 6 | 0 | 2 | 2 | 2 | 2 | 2 | 5.33 | 1.21 | -1.93 | -0.28 | 0.55  | 0.55  | 0.55  | 0.55  |   |
| chr11 | 6476996  | 6716995  | 3 | 5 | 6 | 6 | 6 | 6 | 0 | 2 | 2 | 2 | 2 | 2 | 5.33 | 1.21 | -1.93 | -0.28 | 0.55  | 0.55  | 0.55  | 0.55  |   |
| chr11 | 6716996  | 6726995  | 3 | 5 | 6 | 6 | 6 | 6 | 0 | 2 | 2 | 2 | 2 | 2 | 5.33 | 1.21 | -1.93 | -0.28 | 0.55  | 0.55  | 0.55  | 0.55  |   |
| chr11 | 6726996  | 18748995 | 3 | 5 | 6 | 6 | 6 | 6 | 0 | 2 | 2 | 2 | 2 | 2 | 5.33 | 1.21 | -1.93 | -0.28 | 0.55  | 0.55  | 0.55  | 0.55  |   |
| chr11 | 18748996 | 18758995 | 3 | 5 | 6 | 6 | 6 | 6 | 0 | 2 | 2 | 2 | 2 | 2 | 5.33 | 1.21 | -1.93 | -0.28 | 0.55  | 0.55  | 0.55  | 0.55  |   |
| chr11 | 18758996 | 31797595 | 2 | 5 | 6 | 6 | 6 | 6 | 0 | 2 | 2 | 2 | 2 | 2 | 5.17 | 1.6  | -1.98 | -0.1  | 0.52  | 0.52  | 0.52  | 0.52  |   |
| chr11 | 31797596 | 31807595 | 2 | 5 | 6 | 6 | 6 | 6 | 0 | 2 | 2 | 2 | 2 | 2 | 5.17 | 1.6  | -1.98 | -0.1  | 0.52  | 0.52  | 0.52  | 0.52  |   |
| chr11 | 31807596 | 45777195 | 3 | 5 | 6 | 6 | 6 | 6 | 1 | 2 | 2 | 2 | 2 | 2 | 5.33 | 1.21 | -1.93 | -0.28 | 0.55  | 0.55  | 0.55  | 0.55  |   |
| chr11 | 45777196 | 45787195 | 3 | 5 | 6 | 6 | 6 | 6 | 1 | 2 | 2 | 2 | 2 | 2 | 5.33 | 1.21 | -1.93 | -0.28 | 0.55  | 0.55  | 0.55  | 0.55  |   |
| chr11 | 45787196 | 48190595 | 3 | 5 | 6 | 6 | 6 | 6 | 1 | 2 | 2 | 2 | 2 | 2 | 5.33 | 1.21 | -1.93 | -0.28 | 0.55  | 0.55  | 0.55  | 0.55  |   |
| chr11 | 48190596 | 48200595 | 3 | 5 | 6 | 6 | 6 | 6 | 1 | 2 | 2 | 2 | 2 | 2 | 5.33 | 1.21 | -1.93 | -0.28 | 0.55  | 0.55  | 0.55  | 0.55  |   |
| chr11 | 48200596 | 48791995 | 3 | 5 | 6 | 6 | 6 | 6 | 1 | 2 | 2 | 2 | 1 | 2 | 5.33 | 1.21 | -1.93 | -0.28 | 0.55  | 0.55  | 0.55  | 0.55  |   |
| chr11 | 48791996 | 48801995 | 3 | 5 | 6 | 6 | 6 | 6 | 1 | 2 | 2 | 2 | 1 | 2 | 5.33 | 1.21 | -1.93 | -0.28 | 0.55  | 0.55  | 0.55  | 0.55  |   |
| chr11 | 48801996 | 48961995 | 3 | 5 | 6 | 6 | 6 | 5 | 1 | 2 | 2 | 2 | 1 | 2 | 5.17 | 1.17 | -1.85 | -0.14 | 0.71  | 0.71  | 0.71  | -0.14 |   |
| chr11 | 48961996 | 48971995 | 3 | 5 | 6 | 6 | 6 | 5 | 1 | 2 | 2 | 2 | 1 | 2 | 5.17 | 1.17 | -1.85 | -0.14 | 0.71  | 0.71  | 0.71  | -0.14 |   |
| chr11 | 48971996 | 50633995 | 3 | 5 | 6 | 6 | 6 | 6 | 1 | 2 | 2 | 2 | 1 | 2 | 5.33 | 1.21 | -1.93 | -0.28 | 0.55  | 0.55  | 0.55  | 0.55  |   |
| chr11 | 50633996 | 50644395 | 3 | 5 | 6 | 6 | 6 | 6 | 1 | 2 | 2 | 2 | 1 | 2 | 5.33 | 1.21 | -1.93 | -0.28 | 0.55  | 0.55  | 0.55  | 0.55  |   |
| chr11 | 50644396 | 50672395 | 3 | 5 | 6 | 5 | 6 | 6 | 1 | 2 | 2 | 2 | 0 | 2 | 5.17 | 1.17 | -1.85 | -0.14 | 0.71  | -0.14 | 0.71  | 0.71  |   |
| chr11 | 50672396 | 50682395 | 3 | 5 | 6 | 5 | 6 | 6 | 1 | 2 | 2 | 2 | 0 | 2 | 5.17 | 1.17 | -1.85 | -0.14 | 0.71  | -0.14 | 0.71  | 0.71  |   |
| chr11 | 50682396 | 50772395 | 3 | 5 | 6 | 5 | 6 | 5 | 1 | 2 | 2 | 2 | 0 | 2 | 1    | 5    | 1.1   | -1.83 | 0     | 0.91  | 0     | 0.91  | 0 |
| chr11 | 50772396 | 50782395 | 3 | 5 | 6 | 5 | 6 | 5 | 1 | 2 | 2 | 2 | 0 | 2 | 1    | 5    | 1.1   | -1.83 | 0     | 0.91  | 0     | 0.91  | 0 |
| chr11 | 50782396 | 51091590 | 3 | 5 | 6 | 5 | 6 | 6 | 1 | 2 | 2 | 2 | 0 | 2 | 5.17 | 1.17 | -1.85 | -0.14 | 0.71  | -0.14 | 0.71  | 0.71  |   |
| chr11 | 51091591 | 51101590 | 3 | 5 | 6 | 5 | 6 | 6 | 1 | 2 | 2 | 2 | 0 | 2 | 5.17 | 1.17 | -1.85 | -0.14 | 0.71  | -0.14 | 0.71  | 0.71  |   |
| chr11 | 51101591 | 51578790 | 3 | 5 | 6 | 6 | 6 | 6 | 1 | 2 | 2 | 2 | 2 | 2 | 5.33 | 1.21 | -1.93 | -0.28 | 0.55  | 0.55  | 0.55  | 0.55  |   |
| chr11 | 51578791 | 55709990 | 3 | 5 | 6 | 6 | 6 | 6 | 1 | 2 | 2 | 2 | 2 | 2 | 5.33 | 1.21 | -1.93 | -0.28 | 0.55  | 0.55  | 0.55  | 0.55  |   |
| chr11 | 55709991 | 56879990 | 3 | 6 | 6 | 6 | 6 | 6 | 1 | 2 | 2 | 2 | 2 | 2 | 5.5  | 1.22 | -2.04 | 0.41  | 0.41  | 0.41  | 0.41  | 0.41  |   |
| chr11 | 56879991 | 56889990 | 3 | 6 | 6 | 6 | 6 | 6 | 1 | 2 | 2 | 2 | 2 | 2 | 5.5  | 1.22 | -2.04 | 0.41  | 0.41  | 0.41  | 0.41  | 0.41  |   |
| chr11 | 56889991 | 57599990 | 3 | 6 | 6 | 6 | 6 | 6 | 1 | 2 | 2 | 2 | 2 | 2 | 5.5  | 1.22 | -2.04 | 0.41  | 0.41  | 0.41  | 0.41  | 0.41  |   |
| chr11 | 57599991 | 57609990 | 3 | 6 | 6 | 6 | 6 | 6 | 1 | 2 | 2 | 2 | 2 | 2 | 5.5  | 1.22 | -2.04 | 0.41  | 0.41  | 0.41  | 0.41  | 0.41  |   |
| chr11 | 57609991 | 61129990 | 3 | 6 | 6 | 6 | 6 | 6 | 1 | 2 | 2 | 2 | 2 | 2 | 5.5  | 1.22 | -2.04 | 0.41  | 0.41  | 0.41  | 0.41  | 0.41  |   |
| chr11 | 61129991 | 61139990 | 3 | 6 | 6 | 6 | 6 | 6 | 1 | 2 | 2 | 2 | 2 | 2 | 5.5  | 1.22 | -2.04 | 0.41  | 0.41  | 0.41  | 0.41  | 0.41  |   |
| chr11 | 61139991 | 67420990 | 3 | 6 | 6 | 6 | 6 | 6 | 1 | 2 | 2 | 2 | 2 | 2 | 5.5  | 1.22 | -2.04 | 0.41  | 0.41  | 0.41  | 0.41  | 0.41  |   |
| chr11 | 67420991 | 67430990 | 3 | 6 | 6 | 6 | 6 | 6 | 1 | 2 | 2 | 2 | 2 | 2 | 5.5  | 1.22 | -2.04 | 0.41  | 0.41  | 0.41  | 0.41  | 0.41  |   |
| chr11 | 67430991 | 67580990 | 3 | 6 | 6 | 6 | 6 | 6 | 1 | 2 | 2 | 2 | 2 | 2 | 5.5  | 1.22 | -2.04 | 0.41  | 0.41  | 0.41  | 0.41  | 0.41  |   |
| chr11 | 67580991 | 67590990 | 3 | 6 | 6 | 6 | 6 | 6 | 1 | 2 | 2 | 2 | 2 | 2 | 5.5  | 1.22 | -2.04 | 0.41  | 0.41  | 0.41  | 0.41  | 0.41  |   |
| chr11 | 67590991 | 68901190 | 3 | 6 | 6 | 6 | 6 | 6 | 1 | 2 | 2 | 2 | 2 | 2 | 5.5  | 1.22 | -2.04 | 0.41  | 0.41  | 0.41  | 0.41  | 0.41  |   |
| chr11 | 68901191 | 68911190 | 3 | 6 | 6 | 6 | 6 | 6 | 1 | 2 | 2 | 2 | 2 | 2 | 5.5  | 1.22 | -2.04 | 0.41  | 0.41  | 0.41  | 0.41  | 0.41  |   |
| chr11 | 68911191 | 68921390 | 3 | 6 | 6 | 6 | 7 | 6 | 1 | 2 | 2 | 2 | 3 | 2 | 5.67 | 1.37 | -1.95 | 0.24  | 0.24  | 0.98  | 0.24  | 0.24  |   |
| chr11 | 68921391 | 68931390 | 3 | 6 | 7 | 6 | 7 | 6 | 1 | 3 | 3 | 2 | 3 | 3 | 5.83 | 1.47 | -1.92 | 0.11  | 0.79  | 0.11  | 0.79  | 0.11  |   |
| chr11 | 68931391 | 68941590 | 3 | 6 | 7 | 6 | 7 | 7 | 1 | 3 | 3 | 2 | 3 | 3 | 6    | 1.55 | -1.94 | 0     | 0.65  | 0     | 0.65  | 0.65  |   |
| chr11 | 68941591 | 69491785 | 3 | 6 | 7 | 7 | 7 | 7 | 1 | 3 | 3 | 3 | 3 | 3 | 6.17 | 1.6  | -1.98 | -0.1  | 0.52  | 0.52  | 0.52  | 0.52  |   |
| chr11 | 69491786 | 69501785 | 3 | 6 | 7 | 7 | 7 | 7 | 1 | 3 | 3 | 3 | 3 | 3 | 6.17 | 1.6  | -1.98 | -0.1  | 0.52  | 0.52  | 0.52  | 0.52  |   |
| chr11 | 69501786 | 69521385 | 3 | 6 | 6 | 6 | 7 | 7 | 1 | 3 | 2 | 2 | 3 | 3 | 5.83 | 1.47 | -1.92 | 0.11  | 0.11  | 0.11  | 0.79  | 0.79  |   |
| chr11 | 69521386 | 69531385 | 3 | 6 | 6 | 6 | 7 | 7 | 1 | 3 | 2 | 2 | 3 | 3 | 5.83 | 1.47 | -1.92 | 0.11  | 0.11  | 0.11  | 0.79  | 0.79  |   |
| chr11 | 69531386 | 72921585 | 3 | 6 | 6 | 6 | 6 | 6 | 1 | 2 | 2 | 2 | 2 | 2 | 5.5  | 1.22 | -2.04 | 0.41  | 0.41  | 0.41  | 0.41  | 0.41  |   |
| chr11 | 72921586 | 72931585 | 3 | 6 | 6 | 6 | 6 | 6 | 1 | 2 | 2 | 2 | 2 | 2 | 5.5  | 1.22 | -2.04 | 0.41  | 0.41  | 0.41  | 0.41  | 0.41  |   |
| chr11 | 72931586 | 72971585 | 3 | 6 | 6 | 6 | 5 | 6 | 1 | 2 | 2 | 2 | 2 | 2 | 5.33 | 1.21 | -1.93 | 0.55  | 0.55  | 0.55  | -0.28 | 0.55  |   |
| chr11 | 72971586 | 72981585 | 3 | 6 | 6 | 6 | 5 | 6 | 1 | 2 | 2 | 2 | 2 | 2 | 5.33 | 1.21 | -1.93 | 0.55  | 0.55  | 0.55  | -0.28 | 0.55  |   |
| chr11 | 72981586 | 73951585 | 3 | 6 | 6 | 6 | 6 | 6 | 1 | 2 | 2 | 2 | 2 | 2 | 5.5  | 1.22 | -2.04 | 0.41  | 0.41  | 0.41  | 0.41  | 0.41  |   |
| chr11 | 73951586 | 73961585 | 3 | 6 | 6 | 6 | 6 | 6 | 1 | 2 | 2 | 2 | 2 | 2 | 5.5  | 1.22 | -2.04 | 0.41  | 0.41  | 0.41  | 0.41  | 0.41  |   |
| chr11 | 73961586 | 74191585 | 3 | 6 | 6 | 6 | 6 | 6 | 1 | 2 | 2 | 2 | 2 | 2 | 5.5  | 1.22 | -2.04 | 0.41  | 0.41  | 0.41  | 0.41  | 0.41  |   |
| chr11 | 74191586 | 74201585 | 3 | 6 | 6 | 6 | 6 | 6 | 1 | 2 | 2 | 2 | 2 | 2 | 5.5  | 1.22 | -2.04 | 0.41  | 0.41  | 0.41  | 0.41  | 0.41  |   |
| chr11 | 74201586 | 78361585 | 3 | 6 | 6 | 6 | 6 | 6 | 1 | 2 | 2 | 2 | 2 | 2 | 5.5  | 1.22 | -2.04 | 0.41  | 0.41  | 0.41  | 0.41  | 0.41  |   |
| chr11 | 78361586 | 78371585 | 3 | 6 | 6 | 6 | 6 | 6 | 1 | 2 | 2 | 2 | 2 | 2 | 5.5  | 1.22 | -2.04 | 0.41  | 0.41  | 0.41  | 0.41  | 0.41  |   |
| chr11 | 78371586 | 82601585 | 3 | 6 | 6 | 6 | 6 | 6 | 1 | 2 | 2 | 2 | 2 | 2 | 5.5  | 1.22 | -2.04 | 0.41  | 0.41  | 0.41  | 0.41  | 0.41  |   |
| chr11 | 82601586 | 82611585 | 3 | 6 | 6 | 6 | 6 | 6 | 1 | 2 | 2 | 2 | 2 | 2 | 5.5  | 1.22 | -2.04 | 0.41  | 0.41  | 0.41  | 0.41  | 0.41  |   |
| chr11 | 82611586 | 83011585 | 3 | 6 | 6 | 6 | 6 | 6 | 1 | 2 | 2 | 2 | 2 | 2 | 5.5  | 1.22 | -2.04 | 0.41  | 0.41  | 0.41  | 0.41  | 0.41  |   |
| chr11 | 83011586 | 83021585 | 3 | 6 | 6 | 6 | 6 | 6 | 1 | 2 | 2 | 2 | 2 | 2 | 5.5  | 1.22 | -2.04 | 0.41  | 0.41  | 0.41  | 0.41  | 0.41  |   |
| chr11 | 83021586 | 89541380 | 3 | 6 | 6 | 6 | 6 | 6 | 1 | 2 | 2 | 2 | 2 | 2 | 5.5  | 1.22 | -2.04 | 0.41  | 0.41  | 0.41  | 0.41  | 0.41  |   |
| chr11 | 89541381 | 89551380 | 3 | 6 | 6 | 6 | 6 | 6 | 1 | 2 | 2 | 2 | 2 | 2 | 5.5  | 1.22 | -2.04 | 0.41  | 0.41  | 0.41  | 0.41  | 0.41  |   |
| chr11 | 89551381 | 89561780 | 3 | 5 | 5 | 6 | 6 | 6 | 1 | 2 | 2 | 2 | 2 | 2 | 5.17 | 1.17 | -1.85 | -0.14 | -0.14 | 0.71  | 0.71  | 0.71  |   |
| chr11 | 89561781 | 89651780 | 3 | 5 | 5 | 6 | 5 | 6 | 1 | 2 | 2 | 2 | 2 | 2 | 5    | 1.1  | -1.83 | 0     | 0     | 0.91  | 0     | 0.91  |   |
| chr11 | 89651781 | 89661780 | 3 | 5 | 5 | 6 | 5 | 6 | 1 | 2 | 2 | 2 | 2 | 2 | 5    | 1.1  | -1.83 | 0     | 0     | 0.91  | 0     | 0.91  |   |
| chr11 | 89661781 | 89754380 | 3 | 5 | 6 | 6 | 5 | 6 | 1 | 2 | 2 | 2 | 2 | 2 | 5.17 | 1.17 | -1.85 | -0.14 | 0.71  | 0.71  | -0.14 | 0.71  |   |
| chr11 | 89754381 | 89764380 | 3 | 5 | 6 | 6 | 5 | 6 | 1 | 2 | 2 | 2 | 2 | 2 | 5.17 | 1.17 | -1.85 | -0.14 | 0.71  | 0.71  | -0.14 | 0.71  |   |
| chr11 | 89764381 | 89823980 | 3 | 5 | 6 | 6 | 5 | 5 | 1 | 2 | 2 | 2 | 2 | 2 | 5    | 1.1  | -1.83 | 0     | 0.91  | 0.91  | 0     | 0     |   |
| chr11 | 89823981 | 89833980 | 3 | 5 | 6 | 6 | 5 | 5 | 1 | 2 | 2 | 2 | 2 | 2 | 5    | 1.1  | -1.83 | 0     | 0.91  | 0.91  | 0     | 0     |   |
| chr11 | 89833981 | 89902    |   |   |   |   |   |   |   |   |   |   |   |   |      |      |       |       |       |       |       |       |   |

|       |           |           |   |   |   |   |   |   |   |   |   |   |   |   |      |      |       |       |       |       |       |       |
|-------|-----------|-----------|---|---|---|---|---|---|---|---|---|---|---|---|------|------|-------|-------|-------|-------|-------|-------|
| chr11 | 103895576 | 104025575 | 3 | 6 | 6 | 6 | 5 | 6 | 1 | 2 | 2 | 2 | 1 | 2 | 5.33 | 1.21 | -1.93 | 0.55  | 0.55  | 0.55  | -0.28 | 0.55  |
| chr11 | 104025576 | 104035575 | 3 | 6 | 6 | 6 | 5 | 6 | 1 | 2 | 2 | 2 | 1 | 2 | 5.33 | 1.21 | -1.93 | 0.55  | 0.55  | 0.55  | -0.28 | 0.55  |
| chr11 | 104035576 | 107635575 | 3 | 6 | 6 | 6 | 6 | 6 | 1 | 2 | 2 | 2 | 2 | 2 | 5.5  | 1.22 | -2.04 | 0.41  | 0.41  | 0.41  | 0.41  | 0.41  |
| chr11 | 107635576 | 107645575 | 3 | 6 | 6 | 6 | 6 | 6 | 1 | 2 | 2 | 2 | 2 | 2 | 5.5  | 1.22 | -2.04 | 0.41  | 0.41  | 0.41  | 0.41  | 0.41  |
| chr11 | 107645576 | 108815575 | 3 | 6 | 6 | 6 | 6 | 6 | 1 | 2 | 2 | 2 | 2 | 2 | 5.5  | 1.22 | -2.04 | 0.41  | 0.41  | 0.41  | 0.41  | 0.41  |
| chr11 | 108815576 | 108825575 | 3 | 6 | 6 | 6 | 6 | 6 | 1 | 2 | 2 | 2 | 2 | 2 | 5.5  | 1.22 | -2.04 | 0.41  | 0.41  | 0.41  | 0.41  | 0.41  |
| chr11 | 108825576 | 109955575 | 3 | 6 | 6 | 6 | 6 | 6 | 1 | 2 | 2 | 2 | 2 | 2 | 5.5  | 1.22 | -2.04 | 0.41  | 0.41  | 0.41  | 0.41  | 0.41  |
| chr11 | 109955576 | 109965575 | 3 | 6 | 6 | 6 | 6 | 6 | 1 | 2 | 2 | 2 | 2 | 2 | 5.5  | 1.22 | -2.04 | 0.41  | 0.41  | 0.41  | 0.41  | 0.41  |
| chr11 | 109965576 | 111475975 | 3 | 6 | 6 | 6 | 6 | 6 | 1 | 2 | 2 | 2 | 2 | 2 | 5.5  | 1.22 | -2.04 | 0.41  | 0.41  | 0.41  | 0.41  | 0.41  |
| chr11 | 111475976 | 111485975 | 3 | 6 | 6 | 6 | 6 | 6 | 1 | 2 | 2 | 2 | 2 | 2 | 5.5  | 1.22 | -2.04 | 0.41  | 0.41  | 0.41  | 0.41  | 0.41  |
| chr11 | 111485976 | 111496975 | 3 | 6 | 7 | 6 | 6 | 6 | 1 | 2 | 2 | 2 | 2 | 2 | 5.67 | 1.37 | -1.95 | 0.24  | 0.98  | 0.24  | 0.24  | 0.24  |
| chr11 | 111496976 | 111985975 | 3 | 6 | 7 | 6 | 6 | 6 | 1 | 2 | 2 | 2 | 2 | 2 | 5.67 | 1.37 | -1.95 | 0.24  | 0.98  | 0.24  | 0.24  | 0.24  |
| chr11 | 111985976 | 111995975 | 3 | 6 | 7 | 6 | 6 | 6 | 1 | 2 | 2 | 2 | 2 | 2 | 5.67 | 1.37 | -1.95 | 0.24  | 0.98  | 0.24  | 0.24  | 0.24  |
| chr11 | 111995976 | 112056975 | 3 | 6 | 6 | 6 | 6 | 6 | 1 | 2 | 2 | 2 | 2 | 2 | 5.5  | 1.22 | -2.04 | 0.41  | 0.41  | 0.41  | 0.41  | 0.41  |
| chr11 | 112056976 | 112066975 | 3 | 6 | 6 | 6 | 6 | 6 | 1 | 2 | 2 | 2 | 2 | 2 | 5.5  | 1.22 | -2.04 | 0.41  | 0.41  | 0.41  | 0.41  | 0.41  |
| chr11 | 112066976 | 112086775 | 3 | 6 | 6 | 6 | 6 | 6 | 1 | 2 | 2 | 2 | 2 | 2 | 5.5  | 1.22 | -2.04 | 0.41  | 0.41  | 0.41  | 0.41  | 0.41  |
| chr11 | 112086776 | 112096775 | 3 | 6 | 6 | 6 | 6 | 6 | 1 | 2 | 2 | 2 | 2 | 2 | 5.5  | 1.22 | -2.04 | 0.41  | 0.41  | 0.41  | 0.41  | 0.41  |
| chr11 | 112096776 | 112375575 | 3 | 6 | 6 | 6 | 6 | 6 | 1 | 2 | 2 | 2 | 2 | 2 | 5.5  | 1.22 | -2.04 | 0.41  | 0.41  | 0.41  | 0.41  | 0.41  |
| chr11 | 112375576 | 112385575 | 3 | 6 | 6 | 6 | 6 | 6 | 1 | 2 | 2 | 2 | 2 | 2 | 5.5  | 1.22 | -2.04 | 0.41  | 0.41  | 0.41  | 0.41  | 0.41  |
| chr11 | 112385576 | 113605575 | 3 | 6 | 6 | 6 | 6 | 6 | 1 | 2 | 2 | 2 | 2 | 2 | 5.5  | 1.22 | -2.04 | 0.41  | 0.41  | 0.41  | 0.41  | 0.41  |
| chr11 | 113605576 | 113615575 | 3 | 6 | 6 | 6 | 6 | 6 | 1 | 2 | 2 | 2 | 2 | 2 | 5.5  | 1.22 | -2.04 | 0.41  | 0.41  | 0.41  | 0.41  | 0.41  |
| chr11 | 113615576 | 114305575 | 3 | 6 | 6 | 6 | 6 | 6 | 1 | 2 | 2 | 2 | 2 | 2 | 5.5  | 1.22 | -2.04 | 0.41  | 0.41  | 0.41  | 0.41  | 0.41  |
| chr11 | 114305576 | 114315575 | 3 | 6 | 6 | 6 | 6 | 6 | 1 | 2 | 2 | 2 | 2 | 2 | 5.5  | 1.22 | -2.04 | 0.41  | 0.41  | 0.41  | 0.41  | 0.41  |
| chr11 | 114315576 | 114435575 | 3 | 6 | 6 | 6 | 6 | 6 | 1 | 2 | 2 | 2 | 2 | 2 | 5.5  | 1.22 | -2.04 | 0.41  | 0.41  | 0.41  | 0.41  | 0.41  |
| chr11 | 114435576 | 114445575 | 3 | 6 | 6 | 6 | 6 | 6 | 1 | 2 | 2 | 2 | 2 | 2 | 5.5  | 1.22 | -2.04 | 0.41  | 0.41  | 0.41  | 0.41  | 0.41  |
| chr11 | 114445576 | 114565575 | 3 | 6 | 6 | 6 | 5 | 6 | 1 | 2 | 2 | 2 | 2 | 2 | 5.33 | 1.21 | -1.93 | 0.55  | 0.55  | 0.55  | -0.28 | 0.55  |
| chr11 | 114565576 | 114575575 | 3 | 6 | 6 | 6 | 5 | 6 | 1 | 2 | 2 | 2 | 2 | 2 | 5.33 | 1.21 | -1.93 | 0.55  | 0.55  | 0.55  | -0.28 | 0.55  |
| chr11 | 114575576 | 129695775 | 3 | 6 | 6 | 6 | 6 | 6 | 1 | 2 | 2 | 2 | 2 | 2 | 5.5  | 1.22 | -2.04 | 0.41  | 0.41  | 0.41  | 0.41  | 0.41  |
| chr11 | 129695776 | 129705775 | 3 | 6 | 6 | 6 | 6 | 6 | 1 | 2 | 2 | 2 | 2 | 2 | 5.5  | 1.22 | -2.04 | 0.41  | 0.41  | 0.41  | 0.41  | 0.41  |
| chr11 | 129705776 | 130235775 | 3 | 6 | 6 | 6 | 6 | 6 | 1 | 2 | 2 | 2 | 2 | 2 | 5.5  | 1.22 | -2.04 | 0.41  | 0.41  | 0.41  | 0.41  | 0.41  |
| chr11 | 130235776 | 130245775 | 3 | 6 | 6 | 6 | 6 | 6 | 1 | 2 | 2 | 2 | 2 | 2 | 5.5  | 1.22 | -2.04 | 0.41  | 0.41  | 0.41  | 0.41  | 0.41  |
| chr11 | 130245776 | 133995775 | 3 | 6 | 6 | 6 | 6 | 6 | 1 | 2 | 2 | 2 | 2 | 2 | 5.5  | 1.22 | -2.04 | 0.41  | 0.41  | 0.41  | 0.41  | 0.41  |
| chr11 | 133995776 | 134005775 | 3 | 6 | 6 | 6 | 6 | 6 | 1 | 2 | 2 | 2 | 2 | 2 | 5.5  | 1.22 | -2.04 | 0.41  | 0.41  | 0.41  | 0.41  | 0.41  |
| chr11 | 134005776 | 134317175 | 3 | 6 | 6 | 6 | 6 | 6 | 1 | 2 | 2 | 2 | 2 | 2 | 5.5  | 1.22 | -2.04 | 0.41  | 0.41  | 0.41  | 0.41  | 0.41  |
| chr11 | 134317176 | 134327175 | 3 | 6 | 6 | 6 | 6 | 6 | 1 | 2 | 2 | 2 | 2 | 2 | 5.5  | 1.22 | -2.04 | 0.41  | 0.41  | 0.41  | 0.41  | 0.41  |
| chr11 | 134327176 | 134337175 | 3 | 6 | 6 | 7 | 6 | 6 | 1 | 2 | 2 | 1 | 2 | 2 | 5.67 | 1.37 | -1.95 | 0.24  | 0.24  | 0.98  | 0.24  | 0.24  |
| chr11 | 134337176 | 134347175 | 5 | 7 | 8 | 7 | 8 | 6 | 1 | 2 | 0 | 1 | 2 | 2 | 6.83 | 1.17 | -1.57 | 0.14  | 1     | 0.14  | 1     | -0.71 |
| chr11 | 134347176 | 134926775 | 5 | 7 | 8 | 7 | 8 | 8 | 1 | 2 | 0 | 1 | 2 | 2 | 7.17 | 1.17 | -1.85 | -0.14 | 0.71  | -0.14 | 0.71  | 0.71  |
| chr12 | 69801     | 1891395   | 4 | 4 | 4 | 4 | 4 | 4 | 2 | 2 | 2 | 2 | 2 | 2 | 4    | 0    | 0     | 0     | 0     | 0     | 0     | 0     |
| chr12 | 1891396   | 2871395   | 4 | 4 | 4 | 4 | 4 | 4 | 2 | 2 | 2 | 2 | 2 | 2 | 4    | 0    | 0     | 0     | 0     | 0     | 0     | 0     |
| chr12 | 2871396   | 2881395   | 4 | 4 | 4 | 4 | 4 | 4 | 2 | 2 | 2 | 2 | 2 | 2 | 4    | 0    | 0     | 0     | 0     | 0     | 0     | 0     |
| chr12 | 2881396   | 3081395   | 4 | 5 | 4 | 4 | 4 | 4 | 2 | 2 | 2 | 2 | 2 | 2 | 4.17 | 0.41 | -0.41 | 2.04  | -0.41 | -0.41 | -0.41 | -0.41 |
| chr12 | 3081396   | 3091395   | 4 | 5 | 4 | 4 | 4 | 4 | 2 | 2 | 2 | 2 | 2 | 2 | 4.17 | 0.41 | -0.41 | 2.04  | -0.41 | -0.41 | -0.41 | -0.41 |
| chr12 | 3091396   | 6091195   | 4 | 4 | 4 | 4 | 4 | 4 | 2 | 2 | 2 | 2 | 2 | 2 | 4    | 0    | 0     | 0     | 0     | 0     | 0     | 0     |
| chr12 | 6091196   | 6101195   | 4 | 4 | 4 | 4 | 4 | 4 | 2 | 2 | 2 | 2 | 2 | 2 | 4    | 0    | 0     | 0     | 0     | 0     | 0     | 0     |
| chr12 | 6101196   | 6370995   | 4 | 4 | 4 | 4 | 4 | 4 | 2 | 2 | 2 | 2 | 2 | 2 | 4    | 0    | 0     | 0     | 0     | 0     | 0     | 0     |
| chr12 | 6370996   | 7281390   | 4 | 4 | 4 | 4 | 4 | 4 | 2 | 2 | 2 | 2 | 2 | 2 | 4    | 0    | 0     | 0     | 0     | 0     | 0     | 0     |
| chr12 | 7281391   | 7291390   | 4 | 4 | 4 | 4 | 4 | 4 | 2 | 2 | 2 | 2 | 2 | 2 | 4    | 0    | 0     | 0     | 0     | 0     | 0     | 0     |
| chr12 | 7291391   | 14514790  | 4 | 4 | 4 | 4 | 4 | 4 | 2 | 2 | 2 | 2 | 2 | 2 | 4    | 0    | 0     | 0     | 0     | 0     | 0     | 0     |
| chr12 | 14514791  | 14524790  | 4 | 4 | 4 | 4 | 4 | 4 | 2 | 2 | 2 | 2 | 2 | 2 | 4    | 0    | 0     | 0     | 0     | 0     | 0     | 0     |
| chr12 | 14524791  | 14634790  | 4 | 4 | 4 | 4 | 4 | 4 | 2 | 2 | 2 | 2 | 2 | 2 | 4    | 0    | 0     | 0     | 0     | 0     | 0     | 0     |
| chr12 | 14634791  | 14644790  | 4 | 4 | 4 | 4 | 4 | 4 | 2 | 2 | 2 | 2 | 2 | 2 | 4    | 0    | 0     | 0     | 0     | 0     | 0     | 0     |
| chr12 | 14644791  | 31655390  | 4 | 4 | 4 | 4 | 4 | 4 | 2 | 2 | 2 | 2 | 2 | 2 | 4    | 0    | 0     | 0     | 0     | 0     | 0     | 0     |
| chr12 | 31655391  | 31665390  | 4 | 4 | 4 | 4 | 4 | 4 | 2 | 2 | 2 | 2 | 2 | 2 | 4    | 0    | 0     | 0     | 0     | 0     | 0     | 0     |
| chr12 | 31665391  | 32165390  | 4 | 4 | 4 | 4 | 4 | 4 | 2 | 2 | 2 | 2 | 2 | 2 | 4    | 0    | 0     | 0     | 0     | 0     | 0     | 0     |
| chr12 | 32165391  | 32175390  | 4 | 4 | 4 | 4 | 4 | 4 | 2 | 2 | 2 | 2 | 2 | 2 | 4    | 0    | 0     | 0     | 0     | 0     | 0     | 0     |
| chr12 | 32175391  | 33285190  | 4 | 4 | 4 | 4 | 4 | 4 | 2 | 2 | 2 | 2 | 2 | 2 | 4    | 0    | 0     | 0     | 0     | 0     | 0     | 0     |
| chr12 | 33285191  | 38209985  | 4 | 4 | - | 4 | 4 | 4 | 2 | 2 | - | 2 | 2 | 2 | -    | -    | -     | -     | -     | -     | -     | -     |
| chr12 | 38209986  | 46060185  | 4 | 4 | 4 | 4 | 4 | 4 | 2 | 2 | 2 | 2 | 2 | 2 | 4    | 0    | 0     | 0     | 0     | 0     | 0     | 0     |
| chr12 | 46060186  | 46070185  | 4 | 4 | 4 | 4 | 4 | 4 | 2 | 2 | 2 | 2 | 2 | 2 | 4    | 0    | 0     | 0     | 0     | 0     | 0     | 0     |
| chr12 | 46070186  | 55110985  | 4 | 4 | 4 | 4 | 4 | 4 | 2 | 2 | 2 | 2 | 2 | 2 | 4    | 0    | 0     | 0     | 0     | 0     | 0     | 0     |
| chr12 | 55110986  | 55120985  | 4 | 4 | 4 | 4 | 4 | 4 | 2 | 2 | 2 | 2 | 2 | 2 | 4    | 0    | 0     | 0     | 0     | 0     | 0     | 0     |
| chr12 | 55120986  | 55741385  | 4 | 4 | 4 | 4 | 4 | 4 | 2 | 2 | 2 | 2 | 2 | 2 | 4    | 0    | 0     | 0     | 0     | 0     | 0     | 0     |
| chr12 | 55741386  | 55751385  | 4 | 5 | 4 | 4 | 4 | 4 | 2 | 2 | 2 | 2 | 2 | 2 | 4.17 | 0.41 | -0.41 | 2.04  | -0.41 | -0.41 | -0.41 | -0.41 |
| chr12 | 55751386  | 56451385  | 4 | 5 | 5 | 5 | 5 | 5 | 2 | 2 | 2 | 2 | 2 | 2 | 4.83 | 0.41 | -2.04 | 0.41  | 0.41  | 0.41  | 0.41  | 0.41  |
| chr12 | 56451386  | 56461385  | 4 | 5 | 5 | 5 | 5 | 5 | 2 | 2 | 2 | 2 | 2 | 2 | 4.83 | 0.41 | -2.04 | 0.41  | 0.41  | 0.41  | 0.41  | 0.41  |
| chr12 | 56461386  | 56471385  | 4 | 5 | 5 | 4 | 4 | 4 | 2 | 2 | 2 | 2 | 2 | 2 | 4.5  | 0.55 | -0.91 | 0.91  | 0.91  | -0.91 | -0.91 | 0.91  |
| chr12 | 56471386  | 58471385  | 4 | 4 | 4 | 4 | 4 | 4 | 2 | 2 | 2 | 2 | 2 | 2 | 4    | 0    | 0     | 0     | 0     | 0     | 0     | 0     |
| chr12 | 58471386  | 58481385  | 4 | 4 | 4 | 4 | 4 | 4 | 2 | 2 | 2 | 2 | 2 | 2 | 4    | 0    | 0     | 0     | 0     | 0     | 0     | 0     |
| chr12 | 58481386  | 72011385  | 4 | 4 | 4 | 4 | 4 | 4 | 2 | 2 | 2 | 2 | 2 | 2 | 4    | 0    | 0     | 0     | 0     | 0     | 0     | 0     |
| chr12 | 72011386  | 72291385  | 4 | 4 | 4 | 4 | 4 | 4 | 2 | 2 | 2 | 2 | 2 | 2 | 4    | 0    | 0     | 0     | 0     | 0     | 0     | 0     |
|       |           |           |   |   |   |   |   |   |   |   |   |   |   |   |      |      |       |       |       |       |       |       |

|       |           |           |   |   |   |   |   |   |   |   |   |   |   |   |      |      |       |       |       |       |       |       |       |       |
|-------|-----------|-----------|---|---|---|---|---|---|---|---|---|---|---|---|------|------|-------|-------|-------|-------|-------|-------|-------|-------|
| chr12 | 87002586  | 101452585 | 4 | 4 | 4 | 4 | 4 | 4 | 2 | 2 | 2 | 2 | 2 | 2 | 4    | 0    | 0     | 0     | 0     | 0     | 0     | 0     | 0     | 0     |
| chr12 | 101452586 | 101462585 | 4 | 4 | 4 | 4 | 4 | 4 | 2 | 2 | 2 | 2 | 2 | 2 | 4    | 0    | 0     | 0     | 0     | 0     | 0     | 0     | 0     | 0     |
| chr12 | 101462586 | 101632585 | 4 | 4 | 4 | 4 | 4 | 4 | 2 | 2 | 2 | 2 | 2 | 2 | 4    | 0    | 0     | 0     | 0     | 0     | 0     | 0     | 0     | 0     |
| chr12 | 101632586 | 101642585 | 4 | 4 | 4 | 4 | 4 | 4 | 2 | 2 | 2 | 2 | 2 | 2 | 4    | 0    | 0     | 0     | 0     | 0     | 0     | 0     | 0     | 0     |
| chr12 | 101642586 | 105992585 | 4 | 4 | 4 | 4 | 4 | 4 | 2 | 2 | 2 | 2 | 2 | 2 | 4    | 0    | 0     | 0     | 0     | 0     | 0     | 0     | 0     | 0     |
| chr12 | 105992586 | 106002585 | 4 | 4 | 4 | 4 | 4 | 4 | 2 | 2 | 2 | 2 | 2 | 2 | 4    | 0    | 0     | 0     | 0     | 0     | 0     | 0     | 0     | 0     |
| chr12 | 106002586 | 106172585 | 4 | 4 | 4 | 4 | 4 | 4 | 2 | 2 | 2 | 2 | 2 | 2 | 4    | 0    | 0     | 0     | 0     | 0     | 0     | 0     | 0     | 0     |
| chr12 | 106172586 | 106182585 | 4 | 4 | 4 | 4 | 4 | 4 | 2 | 2 | 2 | 2 | 2 | 2 | 4    | 0    | 0     | 0     | 0     | 0     | 0     | 0     | 0     | 0     |
| chr12 | 106182586 | 110592385 | 4 | 4 | 4 | 4 | 4 | 4 | 2 | 2 | 2 | 2 | 2 | 2 | 4    | 0    | 0     | 0     | 0     | 0     | 0     | 0     | 0     | 0     |
| chr12 | 110592386 | 110602385 | 4 | 4 | 4 | 4 | 4 | 4 | 2 | 2 | 2 | 2 | 2 | 2 | 4    | 0    | 0     | 0     | 0     | 0     | 0     | 0     | 0     | 0     |
| chr12 | 110602386 | 111082385 | 4 | 5 | 4 | 4 | 4 | 4 | 2 | 2 | 2 | 2 | 2 | 2 | 4.17 | 0.41 | -0.41 | 2.04  | -0.41 | -0.41 | -0.41 | -0.41 | -0.41 | -0.41 |
| chr12 | 111082386 | 111092385 | 4 | 5 | 4 | 4 | 4 | 4 | 2 | 2 | 2 | 2 | 2 | 2 | 4.17 | 0.41 | -0.41 | 2.04  | -0.41 | -0.41 | -0.41 | -0.41 | -0.41 | -0.41 |
| chr12 | 111092386 | 126043870 | 4 | 4 | 4 | 4 | 4 | 4 | 2 | 2 | 2 | 2 | 2 | 2 | 4    | 0    | 0     | 0     | 0     | 0     | 0     | 0     | 0     | 0     |
| chr12 | 126043871 | 126053870 | 4 | 4 | 5 | 4 | 4 | 4 | 2 | 2 | 2 | 2 | 2 | 2 | 4.17 | 0.41 | -0.41 | -0.41 | 2.04  | -0.41 | -0.41 | -0.41 | -0.41 | -0.41 |
| chr12 | 126053871 | 126064270 | 5 | 4 | 5 | 4 | 4 | 4 | 2 | 2 | 2 | 2 | 2 | 2 | 4.33 | 0.52 | 1.29  | -0.65 | 1.29  | -0.65 | -0.65 | -0.65 | -0.65 | -0.65 |
| chr12 | 126064271 | 126083870 | 5 | 4 | 5 | 4 | 4 | 6 | 2 | 2 | 2 | 2 | 2 | 2 | 4.67 | 0.82 | 0.41  | -0.82 | 0.41  | -0.82 | -0.82 | -0.82 | 1.63  | 1.63  |
| chr12 | 126083871 | 126093870 | 5 | 4 | 5 | 4 | 4 | 6 | 2 | 2 | 2 | 2 | 2 | 2 | 4.67 | 0.82 | 0.41  | -0.82 | 0.41  | -0.82 | -0.82 | -0.82 | 1.63  | 1.63  |
| chr12 | 126093871 | 126103870 | 5 | 4 | 4 | 4 | 4 | 6 | 2 | 2 | 2 | 2 | 2 | 2 | 4.5  | 0.84 | 0.6   | -0.6  | -0.6  | -0.6  | -0.6  | -0.6  | 1.79  | 1.79  |
| chr12 | 126103871 | 128534070 | 4 | 4 | 4 | 4 | 4 | 4 | 2 | 2 | 2 | 2 | 2 | 2 | 4    | 0    | 0     | 0     | 0     | 0     | 0     | 0     | 0     | 0     |
| chr12 | 128534071 | 128544070 | 4 | 4 | 4 | 4 | 4 | 4 | 2 | 2 | 2 | 2 | 2 | 2 | 4    | 0    | 0     | 0     | 0     | 0     | 0     | 0     | 0     | 0     |
| chr12 | 128544071 | 128604070 | 4 | 4 | 4 | 4 | 3 | 4 | 2 | 2 | 2 | 2 | 1 | 2 | 3.83 | 0.41 | 0.41  | 0.41  | 0.41  | 0.41  | -2.04 | -0.41 | 0.41  | 0.41  |
| chr12 | 128604071 | 128614070 | 4 | 4 | 4 | 4 | 3 | 4 | 2 | 2 | 2 | 2 | 1 | 2 | 3.83 | 0.41 | 0.41  | 0.41  | 0.41  | 0.41  | -2.04 | -0.41 | 0.41  | 0.41  |
| chr12 | 128614071 | 131203870 | 4 | 4 | 4 | 4 | 4 | 4 | 2 | 2 | 2 | 2 | 2 | 2 | 4    | 0    | 0     | 0     | 0     | 0     | 0     | 0     | 0     | 0     |
| chr12 | 131203871 | 131213870 | 4 | 4 | 4 | 4 | 4 | 4 | 2 | 2 | 2 | 2 | 2 | 2 | 4    | 0    | 0     | 0     | 0     | 0     | 0     | 0     | 0     | 0     |
| chr12 | 131213871 | 131264070 | 4 | 4 | 4 | 4 | 4 | 4 | 2 | 2 | 2 | 2 | 2 | 2 | 4    | 0    | 0     | 0     | 0     | 0     | 0     | 0     | 0     | 0     |
| chr12 | 131264071 | 131274070 | 4 | 4 | 4 | 4 | 4 | 4 | 2 | 2 | 2 | 2 | 2 | 2 | 4    | 0    | 0     | 0     | 0     | 0     | 0     | 0     | 0     | 0     |
| chr12 | 131274071 | 131423870 | 4 | 4 | 4 | 4 | 4 | 4 | 2 | 2 | 2 | 2 | 2 | 2 | 4    | 0    | 0     | 0     | 0     | 0     | 0     | 0     | 0     | 0     |
| chr12 | 131423871 | 131433870 | 4 | 4 | 4 | 4 | 4 | 4 | 2 | 2 | 2 | 2 | 2 | 2 | 4    | 0    | 0     | 0     | 0     | 0     | 0     | 0     | 0     | 0     |
| chr12 | 131433871 | 131544070 | 4 | 4 | 4 | 4 | 4 | 4 | 2 | 2 | 2 | 2 | 2 | 2 | 4    | 0    | 0     | 0     | 0     | 0     | 0     | 0     | 0     | 0     |
| chr12 | 131544071 | 131554070 | 4 | 4 | 4 | 4 | 4 | 4 | 2 | 2 | 2 | 2 | 2 | 2 | 4    | 0    | 0     | 0     | 0     | 0     | 0     | 0     | 0     | 0     |
| chr12 | 131554071 | 132174670 | 4 | 4 | 4 | 4 | 4 | 4 | 2 | 2 | 2 | 2 | 2 | 2 | 4    | 0    | 0     | 0     | 0     | 0     | 0     | 0     | 0     | 0     |
| chr12 | 132174671 | 132184670 | 4 | 4 | 4 | 4 | 4 | 4 | 2 | 2 | 2 | 2 | 2 | 2 | 4    | 0    | 0     | 0     | 0     | 0     | 0     | 0     | 0     | 0     |
| chr12 | 132184671 | 133124665 | 4 | 4 | 4 | 4 | 4 | 4 | 2 | 2 | 2 | 2 | 2 | 2 | 4    | 0    | 0     | 0     | 0     | 0     | 0     | 0     | 0     | 0     |
| chr12 | 133124666 | 133134665 | 4 | 4 | 4 | 4 | 4 | 4 | 2 | 2 | 2 | 2 | 2 | 2 | 4    | 0    | 0     | 0     | 0     | 0     | 0     | 0     | 0     | 0     |
| chr12 | 133134666 | 133144665 | 4 | 4 | 4 | 4 | 4 | 4 | 2 | 2 | 2 | 2 | 2 | 2 | 4    | 0    | 0     | 0     | 0     | 0     | 0     | 0     | 0     | 0     |
| chr12 | 133144666 | 133154665 | 4 | 4 | 4 | 4 | 4 | 4 | 2 | 2 | 2 | 2 | 2 | 2 | 4    | 0    | 0     | 0     | 0     | 0     | 0     | 0     | 0     | 0     |
| chr12 | 133154666 | 133704665 | 4 | 4 | 4 | 4 | 4 | 4 | 2 | 2 | 2 | 2 | 2 | 2 | 4    | 0    | 0     | 0     | 0     | 0     | 0     | 0     | 0     | 0     |
| chr12 | 133704666 | 133714665 | 4 | 4 | 4 | 4 | 4 | 4 | 2 | 2 | 2 | 2 | 2 | 2 | 4    | 0    | 0     | 0     | 0     | 0     | 0     | 0     | 0     | 0     |
| chr12 | 133714666 | 133824665 | 4 | 4 | 4 | 4 | 4 | 4 | 2 | 2 | 2 | 2 | 2 | 2 | 4    | 0    | 0     | 0     | 0     | 0     | 0     | 0     | 0     | 0     |
| chr13 | 19509801  | 22180800  | 3 | 3 | 3 | 3 | 3 | 3 | 1 | 1 | 0 | 0 | 0 | 0 | 3    | 0    | 0     | 0     | 0     | 0     | 0     | 0     | 0     | 0     |
| chr13 | 22180801  | 32710800  | 2 | 3 | 3 | 3 | 3 | 3 | 0 | 1 | 0 | 0 | 0 | 0 | 2.83 | 0.41 | -2.04 | 0.41  | 0.41  | 0.41  | 0.41  | 0.41  | 0.41  | 0.41  |
| chr13 | 32710801  | 33160800  | 2 | 3 | 3 | 3 | 3 | 3 | 0 | 1 | 0 | 0 | 0 | 0 | 2.83 | 0.41 | -2.04 | 0.41  | 0.41  | 0.41  | 0.41  | 0.41  | 0.41  | 0.41  |
| chr13 | 33160801  | 33170800  | 2 | 3 | 3 | 3 | 3 | 3 | 0 | 1 | 0 | 0 | 0 | 0 | 2.83 | 0.41 | -2.04 | 0.41  | 0.41  | 0.41  | 0.41  | 0.41  | 0.41  | 0.41  |
| chr13 | 33170801  | 39501000  | 2 | 3 | 3 | 3 | 3 | 3 | 0 | 1 | 0 | 0 | 0 | 0 | 2.83 | 0.41 | -2.04 | 0.41  | 0.41  | 0.41  | 0.41  | 0.41  | 0.41  | 0.41  |
| chr13 | 39501001  | 39511000  | 2 | 3 | 3 | 3 | 3 | 3 | 0 | 1 | 0 | 0 | 0 | 0 | 2.83 | 0.41 | -2.04 | 0.41  | 0.41  | 0.41  | 0.41  | 0.41  | 0.41  | 0.41  |
| chr13 | 39511001  | 39571000  | 2 | 3 | 3 | 3 | 2 | 3 | 0 | 1 | 0 | 0 | 0 | 0 | 2.67 | 0.52 | -1.29 | 0.65  | 0.65  | 0.65  | -1.29 | 0.65  | 0.65  | 0.65  |
| chr13 | 39571001  | 39581000  | 2 | 3 | 3 | 3 | 2 | 3 | 0 | 1 | 0 | 0 | 0 | 0 | 2.67 | 0.52 | -1.29 | 0.65  | 0.65  | 0.65  | -1.29 | 0.65  | 0.65  | 0.65  |
| chr13 | 39581001  | 53347800  | 2 | 3 | 3 | 3 | 3 | 3 | 0 | 1 | 0 | 0 | 0 | 0 | 2.83 | 0.41 | -2.04 | 0.41  | 0.41  | 0.41  | 0.41  | 0.41  | 0.41  | 0.41  |
| chr13 | 53347801  | 53357800  | 2 | 3 | 3 | 3 | 3 | 3 | 0 | 1 | 0 | 0 | 0 | 0 | 2.83 | 0.41 | -2.04 | 0.41  | 0.41  | 0.41  | 0.41  | 0.41  | 0.41  | 0.41  |
| chr13 | 53357801  | 57488000  | 2 | 3 | 3 | 3 | 3 | 3 | 0 | 1 | 0 | 0 | 0 | 0 | 2.83 | 0.41 | -2.04 | 0.41  | 0.41  | 0.41  | 0.41  | 0.41  | 0.41  | 0.41  |
| chr13 | 57488001  | 57498000  | 2 | 3 | 3 | 3 | 3 | 3 | 0 | 1 | 0 | 0 | 0 | 0 | 2.83 | 0.41 | -2.04 | 0.41  | 0.41  | 0.41  | 0.41  | 0.41  | 0.41  | 0.41  |
| chr13 | 57498001  | 57698000  | 2 | 3 | 3 | 3 | 3 | 3 | 0 | 1 | 0 | 0 | 0 | 0 | 2.83 | 0.41 | -2.04 | 0.41  | 0.41  | 0.41  | 0.41  | 0.41  | 0.41  | 0.41  |
| chr13 | 57698001  | 57708000  | 2 | 3 | 3 | 3 | 3 | 3 | 0 | 1 | 0 | 0 | 0 | 0 | 2.83 | 0.41 | -2.04 | 0.41  | 0.41  | 0.41  | 0.41  | 0.41  | 0.41  | 0.41  |
| chr13 | 57708001  | 75831000  | 2 | 3 | 3 | 3 | 3 | 3 | 0 | 1 | 0 | 0 | 0 | 0 | 2.83 | 0.41 | -2.04 | 0.41  | 0.41  | 0.41  | 0.41  | 0.41  | 0.41  | 0.41  |
| chr13 | 75831001  | 75841000  | 2 | 3 | 3 | 3 | 3 | 3 | 0 | 1 | 0 | 0 | 0 | 0 | 2.83 | 0.41 | -2.04 | 0.41  | 0.41  | 0.41  | 0.41  | 0.41  | 0.41  | 0.41  |
| chr13 | 75841001  | 76171000  | 2 | 3 | 3 | 3 | 3 | 3 | 0 | 1 | 0 | 0 | 0 | 0 | 2.83 | 0.41 | -2.04 | 0.41  | 0.41  | 0.41  | 0.41  | 0.41  | 0.41  | 0.41  |
| chr13 | 76171001  | 76181000  | 2 | 3 | 3 | 3 | 3 | 3 | 0 | 1 | 0 | 0 | 0 | 0 | 2.83 | 0.41 | -2.04 | 0.41  | 0.41  | 0.41  | 0.41  | 0.41  | 0.41  | 0.41  |
| chr13 | 76181001  | 86751000  | 2 | 3 | 3 | 3 | 3 | 3 | 0 | 1 | 0 | 0 | 0 | 0 | 2.83 | 0.41 | -2.04 | 0.41  | 0.41  | 0.41  | 0.41  | 0.41  | 0.41  | 0.41  |
| chr13 | 86751001  | 86911195  | 2 | 3 | 3 | 3 | 3 | 3 | 0 | 1 | 0 | 0 | 0 | 0 | 2.83 | 0.41 | -2.04 | 0.41  | 0.41  | 0.41  | 0.41  | 0.41  | 0.41  | 0.41  |
| chr13 | 86911196  | 86951195  | 2 | 3 | 3 | 3 | 2 | 3 | 0 | 1 | 0 | 0 | 0 | 0 | 2.67 | 0.52 | -1.29 | 0.65  | 0.65  | 0.65  | -1.29 | 0.65  | 0.65  | 0.65  |
| chr13 | 86951196  | 86961195  | 2 | 3 | 3 | 3 | 2 | 3 | 0 | 1 | 0 | 0 | 0 | 0 | 2.67 | 0.52 | -1.29 | 0.65  | 0.65  | 0.65  | -1.29 | 0.65  | 0.65  | 0.65  |
| chr13 | 86961196  | 97912795  | 2 | 3 | 3 | 3 | 3 | 3 | 0 | 1 | 0 | 0 | 0 | 0 | 2.83 | 0.41 | -2.04 | 0.41  | 0.41  | 0.41  | 0.41  | 0.41  | 0.41  | 0.41  |
| chr13 | 97912796  | 97922795  | 2 | 3 | 3 | 3 | 3 | 3 | 0 | 1 | 0 | 0 | 0 | 0 | 2.83 | 0.41 | -2.04 | 0.41  | 0.41  | 0.41  | 0.41  | 0.41  | 0.41  | 0.41  |
| chr13 | 97922796  | 101442795 | 2 | 3 | 3 | 3 | 3 | 3 | 0 | 1 | 0 | 0 | 0 | 0 | 2.83 | 0.41 | -2.04 | 0.41  | 0.41  | 0.41  | 0.41  | 0.41  | 0.41  | 0.41  |
| chr13 | 101442796 | 101452795 | 2 | 3 | 3 | 3 | 3 | 3 | 0 | 1 | 0 | 0 | 0 | 0 | 2.83 | 0.41 | -2.04 | 0.41  | 0.41  | 0.41  | 0.41  | 0.41  | 0.41  | 0.41  |
| chr13 | 101452796 | 115093380 | 2 | 3 | 3 | 3 | 3 | 3 | 0 | 1 | 0 | 0 | 0 | 0 | 2.83 | 0.41 | -2.04 | 0.41  |       |       |       |       |       |       |

|       |          |           |   |   |   |   |   |   |   |   |   |   |   |   |      |      |       |       |       |       |       |       |
|-------|----------|-----------|---|---|---|---|---|---|---|---|---|---|---|---|------|------|-------|-------|-------|-------|-------|-------|
| chr14 | 22550201 | 22560200  | 3 | 7 | 7 | 6 | 6 | 7 | 1 | 3 | 3 | 3 | 3 | 3 | 6    | 1.55 | -1.94 | 0.65  | 0.65  | 0     | 0     | 0.65  |
| chr14 | 22560201 | 22599800  | 4 | 7 | 7 | 6 | 6 | 7 | 2 | 3 | 3 | 3 | 3 | 3 | 6.17 | 1.17 | -1.85 | 0.71  | 0.71  | -0.14 | -0.14 | 0.71  |
| chr14 | 22599801 | 22609800  | 4 | 7 | 7 | 6 | 6 | 7 | 2 | 3 | 3 | 3 | 3 | 3 | 6.17 | 1.17 | -1.85 | 0.71  | 0.71  | -0.14 | -0.14 | 0.71  |
| chr14 | 22609801 | 22660000  | 4 | 7 | 7 | 7 | 6 | 7 | 2 | 3 | 3 | 3 | 3 | 3 | 6.33 | 1.21 | -1.93 | 0.55  | 0.55  | 0.55  | -0.28 | 0.55  |
| chr14 | 22660001 | 22670000  | 4 | 7 | 7 | 7 | 6 | 7 | 2 | 3 | 3 | 3 | 3 | 3 | 6.33 | 1.21 | -1.93 | 0.55  | 0.55  | 0.55  | -0.28 | 0.55  |
| chr14 | 22670001 | 22700200  | 4 | 7 | 7 | 7 | 8 | 7 | 2 | 3 | 3 | 3 | 4 | 3 | 6.67 | 1.37 | -1.95 | 0.24  | 0.24  | 0.24  | 0.98  | 0.24  |
| chr14 | 22700201 | 22710200  | 4 | 7 | 7 | 7 | 8 | 7 | 2 | 3 | 3 | 3 | 4 | 3 | 6.67 | 1.37 | -1.95 | 0.24  | 0.24  | 0.24  | 0.98  | 0.24  |
| chr14 | 22710201 | 22940600  | 4 | 7 | 7 | 7 | 8 | 7 | 2 | 3 | 3 | 3 | 4 | 3 | 6.67 | 1.37 | -1.95 | 0.24  | 0.24  | 0.24  | 0.98  | 0.24  |
| chr14 | 22940601 | 22950600  | 4 | 7 | 7 | 7 | 8 | 7 | 2 | 3 | 3 | 3 | 4 | 3 | 6.67 | 1.37 | -1.95 | 0.24  | 0.24  | 0.24  | 0.98  | 0.24  |
| chr14 | 22950601 | 22960600  | 4 | 7 | 7 | 7 | 8 | 7 | 2 | 3 | 3 | 3 | 4 | 3 | 6.67 | 1.37 | -1.95 | 0.24  | 0.24  | 0.24  | 0.98  | 0.24  |
| chr14 | 22960601 | 22970600  | 4 | 7 | 7 | 6 | 8 | 7 | 2 | 3 | 3 | 3 | 4 | 3 | 6.5  | 1.38 | -1.81 | 0.36  | 0.36  | -0.36 | 1.09  | 0.36  |
| chr14 | 22970601 | 22980600  | 3 | 6 | 7 | 6 | 8 | 7 | 1 | 3 | 3 | 3 | 4 | 3 | 6.17 | 1.72 | -1.84 | -0.1  | 0.48  | -0.1  | 1.06  | 0.48  |
| chr14 | 22980601 | 22990600  | 3 | 6 | 7 | 6 | 6 | 7 | 1 | 3 | 3 | 3 | 3 | 3 | 5.83 | 1.47 | -1.92 | 0.11  | 0.79  | 0.11  | 0.11  | 0.79  |
| chr14 | 22990601 | 25560200  | 3 | 6 | 6 | 6 | 6 | 6 | 1 | 3 | 3 | 3 | 3 | 3 | 5.5  | 1.22 | -2.04 | 0.41  | 0.41  | 0.41  | 0.41  | 0.41  |
| chr14 | 25560201 | 25570200  | 3 | 6 | 6 | 6 | 6 | 6 | 1 | 3 | 3 | 3 | 3 | 3 | 5.5  | 1.22 | -2.04 | 0.41  | 0.41  | 0.41  | 0.41  | 0.41  |
| chr14 | 25570201 | 31000400  | 3 | 6 | 6 | 6 | 6 | 6 | 1 | 3 | 3 | 3 | 3 | 3 | 5.5  | 1.22 | -2.04 | 0.41  | 0.41  | 0.41  | 0.41  | 0.41  |
| chr14 | 31000401 | 31010400  | 3 | 6 | 6 | 6 | 6 | 6 | 1 | 3 | 3 | 3 | 3 | 3 | 5.5  | 1.22 | -2.04 | 0.41  | 0.41  | 0.41  | 0.41  | 0.41  |
| chr14 | 31010401 | 31100200  | 3 | 6 | 6 | 6 | 6 | 6 | 1 | 3 | 3 | 3 | 3 | 3 | 5.5  | 1.22 | -2.04 | 0.41  | 0.41  | 0.41  | 0.41  | 0.41  |
| chr14 | 31100201 | 31110200  | 3 | 6 | 6 | 6 | 6 | 6 | 1 | 3 | 3 | 3 | 3 | 3 | 5.5  | 1.22 | -2.04 | 0.41  | 0.41  | 0.41  | 0.41  | 0.41  |
| chr14 | 31110201 | 31840200  | 3 | 6 | 6 | 7 | 6 | 6 | 1 | 3 | 3 | 3 | 3 | 3 | 5.67 | 1.37 | -1.95 | 0.24  | 0.24  | 0.98  | 0.24  | 0.24  |
| chr14 | 31840201 | 31850200  | 3 | 6 | 6 | 7 | 6 | 6 | 1 | 3 | 3 | 3 | 3 | 3 | 5.67 | 1.37 | -1.95 | 0.24  | 0.24  | 0.98  | 0.24  | 0.24  |
| chr14 | 31850201 | 32610400  | 3 | 6 | 6 | 6 | 6 | 6 | 1 | 3 | 3 | 3 | 3 | 3 | 5.5  | 1.22 | -2.04 | 0.41  | 0.41  | 0.41  | 0.41  | 0.41  |
| chr14 | 32610401 | 32620400  | 3 | 6 | 6 | 6 | 6 | 6 | 1 | 3 | 3 | 3 | 3 | 3 | 5.5  | 1.22 | -2.04 | 0.41  | 0.41  | 0.41  | 0.41  | 0.41  |
| chr14 | 32620401 | 33911400  | 3 | 6 | 6 | 6 | 6 | 6 | 1 | 3 | 3 | 3 | 3 | 3 | 5.5  | 1.22 | -2.04 | 0.41  | 0.41  | 0.41  | 0.41  | 0.41  |
| chr14 | 33911401 | 33921400  | 3 | 6 | 6 | 6 | 6 | 6 | 1 | 3 | 3 | 3 | 3 | 3 | 5.5  | 1.22 | -2.04 | 0.41  | 0.41  | 0.41  | 0.41  | 0.41  |
| chr14 | 33921401 | 34131400  | 3 | 6 | 6 | 6 | 5 | 6 | 1 | 3 | 3 | 3 | 2 | 3 | 5.33 | 1.21 | -1.93 | 0.55  | 0.55  | 0.55  | -0.28 | 0.55  |
| chr14 | 34131401 | 34141400  | 3 | 6 | 6 | 6 | 5 | 6 | 1 | 3 | 3 | 3 | 2 | 3 | 5.33 | 1.21 | -1.93 | 0.55  | 0.55  | 0.55  | -0.28 | 0.55  |
| chr14 | 34141401 | 39272600  | 3 | 6 | 6 | 6 | 6 | 6 | 1 | 3 | 3 | 3 | 3 | 3 | 5.5  | 1.22 | -2.04 | 0.41  | 0.41  | 0.41  | 0.41  | 0.41  |
| chr14 | 39272601 | 39282600  | 3 | 6 | 6 | 6 | 6 | 6 | 1 | 3 | 3 | 3 | 3 | 3 | 5.5  | 1.22 | -2.04 | 0.41  | 0.41  | 0.41  | 0.41  | 0.41  |
| chr14 | 39282601 | 39292800  | 3 | 7 | 6 | 6 | 6 | 7 | 1 | 3 | 3 | 3 | 3 | 3 | 5.83 | 1.47 | -1.92 | 0.79  | 0.11  | 0.11  | 0.11  | 0.79  |
| chr14 | 39292801 | 39312400  | 3 | 7 | 7 | 6 | 7 | 7 | 1 | 3 | 3 | 3 | 3 | 3 | 6.17 | 1.6  | -1.98 | 0.52  | 0.52  | -0.1  | 0.52  | 0.52  |
| chr14 | 39312401 | 39603000  | 3 | 7 | 7 | 7 | 7 | 7 | 1 | 3 | 3 | 3 | 3 | 3 | 6.33 | 1.63 | -2.04 | 0.41  | 0.41  | 0.41  | 0.41  | 0.41  |
| chr14 | 39603001 | 39613000  | 3 | 7 | 7 | 7 | 7 | 7 | 1 | 3 | 3 | 3 | 3 | 3 | 6.33 | 1.63 | -2.04 | 0.41  | 0.41  | 0.41  | 0.41  | 0.41  |
| chr14 | 39613001 | 39742400  | 3 | 6 | 7 | 7 | 6 | 6 | 1 | 3 | 3 | 3 | 3 | 3 | 5.83 | 1.47 | -1.92 | 0.11  | 0.79  | 0.79  | 0.11  | 0.11  |
| chr14 | 39742401 | 39752400  | 3 | 6 | 7 | 7 | 6 | 6 | 1 | 3 | 3 | 3 | 3 | 3 | 5.83 | 1.47 | -1.92 | 0.11  | 0.79  | 0.79  | 0.11  | 0.11  |
| chr14 | 39752401 | 39912800  | 3 | 6 | 6 | 6 | 6 | 6 | 1 | 3 | 3 | 3 | 3 | 3 | 5.5  | 1.22 | -2.04 | 0.41  | 0.41  | 0.41  | 0.41  | 0.41  |
| chr14 | 39912801 | 39922800  | 3 | 6 | 6 | 6 | 6 | 6 | 1 | 3 | 3 | 3 | 3 | 3 | 5.5  | 1.22 | -2.04 | 0.41  | 0.41  | 0.41  | 0.41  | 0.41  |
| chr14 | 39922801 | 45352800  | 3 | 6 | 6 | 6 | 6 | 6 | 1 | 3 | 3 | 3 | 3 | 3 | 5.5  | 1.22 | -2.04 | 0.41  | 0.41  | 0.41  | 0.41  | 0.41  |
| chr14 | 45352801 | 45362800  | 3 | 6 | 6 | 6 | 6 | 6 | 1 | 3 | 3 | 3 | 3 | 3 | 5.5  | 1.22 | -2.04 | 0.41  | 0.41  | 0.41  | 0.41  | 0.41  |
| chr14 | 45362801 | 45822800  | 3 | 6 | 6 | 6 | 6 | 6 | 1 | 3 | 3 | 3 | 3 | 3 | 5.5  | 1.22 | -2.04 | 0.41  | 0.41  | 0.41  | 0.41  | 0.41  |
| chr14 | 45822801 | 45832800  | 3 | 6 | 6 | 6 | 6 | 6 | 1 | 3 | 3 | 3 | 3 | 3 | 5.5  | 1.22 | -2.04 | 0.41  | 0.41  | 0.41  | 0.41  | 0.41  |
| chr14 | 45832801 | 49522800  | 3 | 6 | 6 | 6 | 6 | 6 | 1 | 3 | 3 | 3 | 3 | 3 | 5.5  | 1.22 | -2.04 | 0.41  | 0.41  | 0.41  | 0.41  | 0.41  |
| chr14 | 49522801 | 49532800  | 3 | 6 | 6 | 6 | 6 | 6 | 1 | 3 | 3 | 3 | 3 | 3 | 5.5  | 1.22 | -2.04 | 0.41  | 0.41  | 0.41  | 0.41  | 0.41  |
| chr14 | 49532801 | 58633600  | 3 | 6 | 6 | 6 | 6 | 6 | 1 | 3 | 3 | 3 | 3 | 3 | 5.5  | 1.22 | -2.04 | 0.41  | 0.41  | 0.41  | 0.41  | 0.41  |
| chr14 | 58633601 | 58643600  | 3 | 6 | 6 | 6 | 6 | 6 | 1 | 3 | 3 | 3 | 3 | 3 | 5.5  | 1.22 | -2.04 | 0.41  | 0.41  | 0.41  | 0.41  | 0.41  |
| chr14 | 58643601 | 58653800  | 3 | 6 | 6 | 6 | 6 | 6 | 1 | 3 | 3 | 3 | 3 | 3 | 5.5  | 1.22 | -2.04 | 0.41  | 0.41  | 0.41  | 0.41  | 0.41  |
| chr14 | 58653801 | 58663800  | 3 | 6 | 6 | 6 | 6 | 6 | 1 | 3 | 3 | 3 | 3 | 3 | 5.5  | 1.22 | -2.04 | 0.41  | 0.41  | 0.41  | 0.41  | 0.41  |
| chr14 | 58663801 | 58963600  | 3 | 6 | 6 | 6 | 6 | 6 | 1 | 3 | 3 | 3 | 3 | 3 | 5.5  | 1.22 | -2.04 | 0.41  | 0.41  | 0.41  | 0.41  | 0.41  |
| chr14 | 58963601 | 58973600  | 3 | 6 | 6 | 6 | 6 | 6 | 1 | 3 | 3 | 3 | 3 | 3 | 5.5  | 1.22 | -2.04 | 0.41  | 0.41  | 0.41  | 0.41  | 0.41  |
| chr14 | 58973601 | 62394200  | 3 | 6 | 6 | 6 | 6 | 6 | 1 | 3 | 3 | 3 | 3 | 3 | 5.5  | 1.22 | -2.04 | 0.41  | 0.41  | 0.41  | 0.41  | 0.41  |
| chr14 | 62394201 | 62404200  | 3 | 6 | 6 | 6 | 6 | 6 | 1 | 3 | 3 | 3 | 3 | 3 | 5.5  | 1.22 | -2.04 | 0.41  | 0.41  | 0.41  | 0.41  | 0.41  |
| chr14 | 62404201 | 63414000  | 3 | 6 | 6 | 6 | 6 | 6 | 1 | 3 | 3 | 3 | 3 | 3 | 5.5  | 1.22 | -2.04 | 0.41  | 0.41  | 0.41  | 0.41  | 0.41  |
| chr14 | 63414001 | 63424000  | 3 | 6 | 6 | 6 | 6 | 6 | 1 | 3 | 3 | 3 | 3 | 3 | 5.5  | 1.22 | -2.04 | 0.41  | 0.41  | 0.41  | 0.41  | 0.41  |
| chr14 | 63424001 | 73974800  | 4 | 4 | 4 | 4 | 4 | 4 | 2 | 2 | 1 | 1 | 1 | 1 | 4    | 0    | 0     | 0     | 0     | 0     | 0     | 0     |
| chr14 | 73974801 | 73984800  | 4 | 4 | 4 | 4 | 4 | 4 | 2 | 2 | 1 | 1 | 1 | 1 | 4    | 0    | 0     | 0     | 0     | 0     | 0     | 0     |
| chr14 | 73984801 | 74024800  | 4 | 4 | 4 | 4 | 4 | 6 | 2 | 2 | 1 | 1 | 1 | 1 | 4.33 | 0.82 | -0.41 | -0.41 | -0.41 | -0.41 | -0.41 | 2.04  |
| chr14 | 74024801 | 74034800  | 4 | 4 | 4 | 4 | 4 | 6 | 2 | 2 | 1 | 1 | 1 | 1 | 4.33 | 0.82 | -0.41 | -0.41 | -0.41 | -0.41 | -0.41 | 2.04  |
| chr14 | 74034801 | 77274600  | 4 | 4 | 4 | 4 | 4 | 4 | 2 | 2 | 1 | 1 | 1 | 1 | 4    | 0    | 0     | 0     | 0     | 0     | 0     | 0     |
| chr14 | 77274601 | 77284600  | 4 | 4 | 4 | 4 | 4 | 4 | 2 | 2 | 1 | 1 | 1 | 1 | 4    | 0    | 0     | 0     | 0     | 0     | 0     | 0     |
| chr14 | 77284601 | 77294800  | 4 | 4 | 4 | 3 | 4 | 4 | 2 | 2 | 1 | 0 | 1 | 1 | 3.83 | 0.41 | 0.41  | 0.41  | 0.41  | -2.04 | 0.41  | 0.41  |
| chr14 | 77294801 | 78314800  | 4 | 4 | 4 | 3 | 4 | 3 | 2 | 2 | 1 | 0 | 1 | 0 | 3.67 | 0.52 | 0.65  | 0.65  | 0.65  | -1.29 | 0.65  | -1.29 |
| chr14 | 78314801 | 78324800  | 4 | 4 | 4 | 3 | 4 | 3 | 2 | 2 | 1 | 0 | 1 | 0 | 3.67 | 0.52 | 0.65  | 0.65  | 0.65  | -1.29 | 0.65  | -1.29 |
| chr14 | 78324801 | 88129800  | 4 | 4 | 4 | 3 | 4 | 3 | 2 | 2 | 1 | 0 | 1 | 0 | 3.67 | 0.52 | 0.65  | 0.65  | 0.65  | -1.29 | 0.65  | -1.29 |
| chr14 | 88129801 | 88139800  | 4 | 4 | 4 | 3 | 4 | 3 | 2 | 2 | 1 | 0 | 1 | 0 | 3.67 | 0.52 | 0.65  | 0.65  | 0.65  | -1.29 | 0.65  | -1.29 |
| chr14 | 88139801 | 97059800  | 4 | 4 | 4 | 3 | 4 | 3 | 2 | 2 | 1 | 0 | 1 | 0 | 3.67 | 0.52 | 0.65  | 0.65  | 0.65  | -1.29 | 0.65  | -1.29 |
| chr14 | 97059801 | 97069800  | 4 | 4 | 4 | 3 | 4 | 3 | 2 | 2 | 1 | 0 | 1 | 0 | 3.67 | 0.52 | 0.65  | 0.65  | 0.65  | -1.29 | 0.65  | -1.29 |
| chr14 | 97069801 | 99739800  | 4 | 4 | 4 | 3 | 4 | 3 | 2 | 2 | 1 | 0 | 1 | 0 | 3.67 | 0.52 | 0.65  | 0.65  | 0.65  | -1.29 | 0.65  | -1.29 |
| chr14 | 99739801 | 99749800  | 4 | 4 | 4 | 3 | 4 | 3 | 2 | 2 | 1 | 0 | 1 | 0 | 3.67 | 0.52 | 0.65  | 0.65  | 0.65  | -1.29 | 0.65  | -1.29 |
| chr14 | 99749801 | 107271000 | 4 | 4 | 4 |   |   |   |   |   |   |   |   |   |      |      |       |       |       |       |       |       |

[illegible]

|       |          |          |   |   |   |   |   |   |   |   |   |   |   |   |      |      |       |       |       |       |       |       |
|-------|----------|----------|---|---|---|---|---|---|---|---|---|---|---|---|------|------|-------|-------|-------|-------|-------|-------|
| chr16 | 32255996 | 32276395 | 4 | 4 | 4 | 3 | 4 | 4 | 2 | 2 | 1 | 0 | 2 | 2 | 3.83 | 0.41 | 0.41  | 0.41  | 0.41  | -2.04 | 0.41  | 0.41  |
| chr16 | 32276396 | 32286395 | 4 | 4 | 4 | 3 | 4 | 4 | 2 | 2 | 1 | 0 | 2 | 2 | 3.83 | 0.41 | 0.41  | 0.41  | 0.41  | -2.04 | 0.41  | 0.41  |
| chr16 | 32286396 | 32296395 | 4 | 4 | 4 | 4 | 4 | 4 | 2 | 2 | 1 | 1 | 2 | 2 | 4    | 0    | 0     | 0     | 0     | 0     | 0     | 0     |
| chr16 | 32296396 | 32306395 | 4 | 4 | 4 | 4 | 4 | 4 | 2 | 2 | 1 | 1 | 2 | 2 | 4    | 0    | 0     | 0     | 0     | 0     | 0     | 0     |
| chr16 | 32306396 | 32646395 | 4 | 4 | 4 | 4 | 4 | 4 | 2 | 2 | 1 | 1 | 2 | 2 | 4    | 0    | 0     | 0     | 0     | 0     | 0     | 0     |
| chr16 | 32646396 | 32656395 | 4 | 4 | 4 | 4 | 4 | 4 | 2 | 2 | 1 | 1 | 2 | 2 | 4    | 0    | 0     | 0     | 0     | 0     | 0     | 0     |
| chr16 | 32656396 | 32666395 | 3 | 4 | 3 | 3 | 3 | 4 | 1 | 2 | 1 | 1 | 1 | 2 | 3.33 | 0.52 | -0.65 | 1.29  | -0.65 | -0.65 | -0.65 | 1.29  |
| chr16 | 32666396 | 32855395 | 3 | 4 | 3 | 3 | 3 | 3 | 1 | 2 | 1 | 1 | 1 | 1 | 3.17 | 0.41 | -0.41 | 2.04  | -0.41 | -0.41 | -0.41 | -0.41 |
| chr16 | 32855396 | 32865395 | 3 | 4 | 3 | 3 | 3 | 3 | 1 | 2 | 1 | 1 | 1 | 1 | 3.17 | 0.41 | -0.41 | 2.04  | -0.41 | -0.41 | -0.41 | -0.41 |
| chr16 | 32865396 | 32885595 | 3 | 3 | 3 | 3 | 3 | 3 | 1 | 1 | 1 | 1 | 1 | 1 | 3    | 0    | 0     | 0     | 0     | 0     | 0     | 0     |
| chr16 | 32885596 | 32895595 | 3 | 3 | 3 | 3 | 3 | 3 | 1 | 1 | 1 | 1 | 1 | 1 | 3    | 0    | 0     | 0     | 0     | 0     | 0     | 0     |
| chr16 | 32895596 | 32935595 | 3 | 3 | 3 | 3 | 2 | 2 | 1 | 1 | 1 | 1 | 1 | 1 | 2.67 | 0.52 | 0.65  | 0.65  | 0.65  | 0.65  | -1.29 | -1.29 |
| chr16 | 32935596 | 32945595 | 3 | 3 | 3 | 3 | 2 | 2 | 1 | 1 | 1 | 1 | 1 | 1 | 2.67 | 0.52 | 0.65  | 0.65  | 0.65  | 0.65  | -1.29 | -1.29 |
| chr16 | 32945596 | 33275395 | 3 | 3 | 3 | 3 | 3 | 3 | 1 | 1 | 1 | 1 | 1 | 1 | 3    | 0    | 0     | 0     | 0     | 0     | 0     | 0     |
| chr16 | 33275396 | 33285395 | 3 | 3 | 3 | 3 | 3 | 3 | 1 | 1 | 1 | 1 | 1 | 1 | 3    | 0    | 0     | 0     | 0     | 0     | 0     | 0     |
| chr16 | 33285396 | 33415595 | 3 | 4 | 3 | 3 | 3 | 3 | 1 | 2 | 1 | 1 | 1 | 1 | 3.17 | 0.41 | -0.41 | 2.04  | -0.41 | -0.41 | -0.41 | -0.41 |
| chr16 | 33415596 | 33425595 | 3 | 4 | 3 | 3 | 3 | 3 | 1 | 2 | 1 | 1 | 1 | 1 | 3.17 | 0.41 | -0.41 | 2.04  | -0.41 | -0.41 | -0.41 | -0.41 |
| chr16 | 33425596 | 33585595 | 4 | 4 | 4 | 3 | 4 | 4 | 2 | 2 | 1 | 1 | 2 | 2 | 3.83 | 0.41 | 0.41  | 0.41  | 0.41  | -2.04 | 0.41  | 0.41  |
| chr16 | 33585596 | 33595595 | 4 | 4 | 4 | 3 | 4 | 4 | 2 | 2 | 1 | 1 | 2 | 2 | 3.83 | 0.41 | 0.41  | 0.41  | 0.41  | -2.04 | 0.41  | 0.41  |
| chr16 | 33595596 | 33625995 | 4 | 4 | 4 | 3 | 3 | 4 | 2 | 2 | 1 | 1 | 1 | 2 | 3.67 | 0.52 | 0.65  | 0.65  | 0.65  | -1.29 | -1.29 | 0.65  |
| chr16 | 33625996 | 33636395 | 4 | 4 | 3 | 3 | 3 | 4 | 2 | 2 | 0 | 1 | 1 | 2 | 3.5  | 0.55 | 0.91  | 0.91  | -0.91 | -0.91 | -0.91 | 0.91  |
| chr16 | 33636396 | 33725395 | 4 | 4 | 3 | 3 | 3 | 3 | 2 | 2 | 0 | 1 | 1 | 1 | 3.33 | 0.52 | 1.29  | 1.29  | -0.65 | -0.65 | -0.65 | -0.65 |
| chr16 | 33725396 | 33735395 | 4 | 4 | 3 | 3 | 3 | 3 | 2 | 2 | 0 | 1 | 1 | 1 | 3.33 | 0.52 | 1.29  | 1.29  | -0.65 | -0.65 | -0.65 | -0.65 |
| chr16 | 33735396 | 33785395 | 4 | 5 | 5 | 4 | 6 | 5 | 2 | 2 | 2 | 1 | 3 | 2 | 4.83 | 0.75 | -1.11 | 0.22  | 0.22  | -1.11 | 1.55  | 0.22  |
| chr16 | 33785396 | 33795395 | 4 | 5 | 5 | 4 | 6 | 5 | 2 | 2 | 2 | 1 | 3 | 2 | 4.83 | 0.75 | -1.11 | 0.22  | 0.22  | -1.11 | 1.55  | 0.22  |
| chr16 | 33795396 | 34186195 | 4 | 4 | 3 | 4 | 4 | 4 | 2 | 2 | 0 | 1 | 2 | 2 | 3.83 | 0.41 | 0.41  | 0.41  | -2.04 | 0.41  | 0.41  | 0.41  |
| chr16 | 34186196 | 34196195 | 4 | 4 | 3 | 4 | 4 | 4 | 2 | 2 | 0 | 1 | 2 | 2 | 3.83 | 0.41 | 0.41  | 0.41  | -2.04 | 0.41  | 0.41  | 0.41  |
| chr16 | 34196196 | 34585595 | 5 | 4 | 3 | 4 | 4 | 4 | 2 | 2 | 0 | 1 | 2 | 2 | 4    | 0.63 | 1.58  | 0     | -1.58 | 0     | 0     | 0     |
| chr16 | 34585596 | 46395990 | 5 | 4 | 3 | 4 | 4 | 4 | 2 | 2 | 0 | 1 | 2 | 2 | 4    | 0.63 | 1.58  | 0     | -1.58 | 0     | 0     | 0     |
| chr16 | 46395991 | 46455990 | 5 | 5 | 4 | 5 | 5 | 5 | 2 | 2 | 1 | 1 | 2 | 2 | 4.83 | 0.41 | 0.41  | 0.41  | -2.04 | 0.41  | 0.41  | 0.41  |
| chr16 | 46455991 | 46465990 | 5 | 3 | 3 | 3 | 5 | 5 | 2 | 1 | 0 | 0 | 2 | 2 | 4    | 1.1  | 0.91  | -0.91 | -0.91 | -0.91 | 0.91  | 0.91  |
| chr16 | 46465991 | 49377790 | 3 | 3 | 3 | 3 | 3 | 3 | 1 | 1 | 0 | 0 | 0 | 0 | 3    | 0    | 0     | 0     | 0     | 0     | 0     | 0     |
| chr16 | 49377791 | 49387790 | 3 | 3 | 3 | 3 | 3 | 3 | 1 | 1 | 0 | 0 | 0 | 0 | 3    | 0    | 0     | 0     | 0     | 0     | 0     | 0     |
| chr16 | 49387791 | 49398190 | 4 | 4 | 3 | 3 | 4 | 4 | 1 | 1 | 0 | 0 | 1 | 1 | 3.67 | 0.52 | 0.65  | 0.65  | -1.29 | -1.29 | 0.65  | 0.65  |
| chr16 | 49398191 | 49877790 | 4 | 4 | 3 | 4 | 4 | 4 | 1 | 1 | 0 | 1 | 1 | 1 | 3.83 | 0.41 | 0.41  | 0.41  | -2.04 | 0.41  | 0.41  | 0.41  |
| chr16 | 49877791 | 49887790 | 4 | 4 | 3 | 4 | 4 | 4 | 1 | 1 | 0 | 1 | 1 | 1 | 3.83 | 0.41 | 0.41  | 0.41  | -2.04 | 0.41  | 0.41  | 0.41  |
| chr16 | 49887791 | 49898190 | 3 | 3 | 3 | 4 | 3 | 3 | 0 | 1 | 0 | 1 | 0 | 0 | 3.17 | 0.41 | -0.41 | -0.41 | -0.41 | 2.04  | -0.41 | -0.41 |
| chr16 | 49898191 | 59530590 | 3 | 3 | 3 | 3 | 3 | 3 | 0 | 1 | 0 | 0 | 0 | 0 | 3    | 0    | 0     | 0     | 0     | 0     | 0     | 0     |
| chr16 | 59530591 | 59540590 | 3 | 3 | 3 | 3 | 3 | 3 | 0 | 1 | 0 | 0 | 0 | 0 | 3    | 0    | 0     | 0     | 0     | 0     | 0     | 0     |
| chr16 | 59540591 | 59790590 | 3 | 3 | 3 | 3 | 2 | 3 | 0 | 1 | 0 | 0 | 0 | 0 | 2.83 | 0.41 | 0.41  | 0.41  | 0.41  | 0.41  | -2.04 | 0.41  |
| chr16 | 59790591 | 59800590 | 3 | 3 | 3 | 3 | 2 | 3 | 0 | 1 | 0 | 0 | 0 | 0 | 2.83 | 0.41 | 0.41  | 0.41  | 0.41  | 0.41  | -2.04 | 0.41  |
| chr16 | 59800591 | 66360590 | 3 | 3 | 3 | 3 | 3 | 3 | 0 | 1 | 0 | 0 | 0 | 0 | 3    | 0    | 0     | 0     | 0     | 0     | 0     | 0     |
| chr16 | 66360591 | 66370590 | 3 | 3 | 3 | 3 | 3 | 3 | 0 | 1 | 0 | 0 | 0 | 0 | 3    | 0    | 0     | 0     | 0     | 0     | 0     | 0     |
| chr16 | 66370591 | 70150790 | 3 | 3 | 3 | 3 | 3 | 3 | 0 | 1 | 0 | 0 | 0 | 0 | 3    | 0    | 0     | 0     | 0     | 0     | 0     | 0     |
| chr16 | 70150791 | 70160790 | 3 | 3 | 3 | 3 | 3 | 3 | 0 | 1 | 0 | 0 | 0 | 0 | 3    | 0    | 0     | 0     | 0     | 0     | 0     | 0     |
| chr16 | 70160791 | 70200790 | 4 | 3 | 3 | 3 | 4 | 4 | 2 | 1 | 0 | 0 | 2 | 2 | 3.5  | 0.55 | 0.91  | -0.91 | -0.91 | -0.91 | 0.91  | 0.91  |
| chr16 | 70200791 | 70210790 | 4 | 3 | 3 | 3 | 4 | 4 | 2 | 1 | 0 | 0 | 2 | 2 | 3.5  | 0.55 | 0.91  | -0.91 | -0.91 | -0.91 | 0.91  | 0.91  |
| chr16 | 70210791 | 70840790 | 3 | 3 | 3 | 3 | 3 | 3 | 1 | 1 | 0 | 0 | 0 | 0 | 3    | 0    | 0     | 0     | 0     | 0     | 0     | 0     |
| chr16 | 70840791 | 70850790 | 3 | 3 | 3 | 3 | 3 | 3 | 1 | 1 | 0 | 0 | 0 | 0 | 3    | 0    | 0     | 0     | 0     | 0     | 0     | 0     |
| chr16 | 70850791 | 70861590 | 3 | 3 | 3 | 3 | 4 | 4 | 1 | 1 | 0 | 0 | 1 | 1 | 3.33 | 0.52 | -0.65 | -0.65 | -0.65 | -0.65 | 1.29  | 1.29  |
| chr16 | 70861591 | 70881190 | 3 | 4 | 3 | 3 | 4 | 4 | 1 | 1 | 0 | 0 | 1 | 1 | 3.5  | 0.55 | -0.91 | 0.91  | -0.91 | -0.91 | 0.91  | 0.91  |
| chr16 | 70881191 | 70891190 | 3 | 4 | 3 | 3 | 4 | 4 | 1 | 1 | 0 | 0 | 1 | 1 | 3.5  | 0.55 | -0.91 | 0.91  | -0.91 | -0.91 | 0.91  | 0.91  |
| chr16 | 70891191 | 71191190 | 3 | 4 | 4 | 3 | 4 | 4 | 1 | 1 | 0 | 0 | 1 | 1 | 3.67 | 0.52 | -1.29 | 0.65  | 0.65  | -1.29 | 0.65  | 0.65  |
| chr16 | 71191191 | 71201190 | 3 | 4 | 3 | 3 | 4 | 4 | 1 | 1 | 0 | 0 | 1 | 1 | 3.5  | 0.55 | -0.91 | 0.91  | -0.91 | -0.91 | 0.91  | 0.91  |
| chr16 | 71201191 | 71211190 | 3 | 3 | 3 | 3 | 3 | 3 | 1 | 1 | 0 | 0 | 0 | 0 | 3    | 0    | 0     | 0     | 0     | 0     | 0     | 0     |
| chr16 | 71211191 | 73330790 | 3 | 3 | 3 | 3 | 3 | 3 | 0 | 1 | 0 | 0 | 0 | 0 | 3    | 0    | 0     | 0     | 0     | 0     | 0     | 0     |
| chr16 | 73330791 | 73340790 | 3 | 3 | 3 | 3 | 3 | 3 | 0 | 1 | 0 | 0 | 0 | 0 | 3    | 0    | 0     | 0     | 0     | 0     | 0     | 0     |
| chr16 | 73340791 | 74180790 | 3 | 3 | 3 | 3 | 3 | 3 | 0 | 1 | 0 | 0 | 0 | 0 | 3    | 0    | 0     | 0     | 0     | 0     | 0     | 0     |
| chr16 | 74180791 | 74190790 | 3 | 3 | 3 | 3 | 3 | 3 | 0 | 1 | 0 | 0 | 0 | 0 | 3    | 0    | 0     | 0     | 0     | 0     | 0     | 0     |
| chr16 | 74190791 | 74351790 | 3 | 3 | 3 | 3 | 3 | 3 | 0 | 1 | 0 | 0 | 0 | 0 | 3    | 0    | 0     | 0     | 0     | 0     | 0     | 0     |
| chr16 | 74351791 | 74361790 | 3 | 3 | 3 | 3 | 3 | 3 | 0 | 1 | 0 | 0 | 0 | 0 | 3    | 0    | 0     | 0     | 0     | 0     | 0     | 0     |
| chr16 | 74361791 | 74381190 | 3 | 4 | 4 | 3 | 3 | 3 | 0 | 2 | 0 | 0 | 0 | 0 | 3.33 | 0.52 | -0.65 | 1.29  | 1.29  | -0.65 | -0.65 | -0.65 |
| chr16 | 74381191 | 74391190 | 3 | 4 | 4 | 3 | 3 | 3 | 0 | 2 | 0 | 0 | 0 | 0 | 3.33 | 0.52 | -0.65 | 1.29  | 1.29  | -0.65 | -0.65 | -0.65 |
| chr16 | 74391191 | 74460790 | 4 | 4 | 4 | 3 | 4 | 4 | 2 | 2 | 0 | 0 | 1 | 2 | 3.83 | 0.41 | 0.41  | 0.41  | 0.41  | -2.04 | 0.41  | 0.41  |
| chr16 | 74460791 | 74470790 | 4 | 4 | 4 | 3 | 4 | 4 | 2 | 2 | 0 | 0 | 1 | 2 | 3.83 | 0.41 | 0.41  | 0.41  | 0.41  | -2.04 | 0.41  | 0.41  |
| chr16 | 74470791 | 88624185 | 3 | 3 | 3 | 3 | 3 | 3 | 0 | 1 | 0 | 0 | 0 | 0 | 3    | 0    | 0     | 0     | 0     | 0     | 0     | 0     |
| chr16 | 88624186 | 88634185 | 3 | 3 | 3 | 3 | 3 | 3 | 0 | 1 | 0 | 0 | 0 | 0 | 3    | 0    | 0     | 0     | 0     | 0     | 0     | 0     |
| chr16 | 88634186 | 88934185 | 3 | 4 | 5 | 4 | 4 | 4 | 0 | 1 | 0 | 0 | 0 | 0 | 4    | 0.63 | -1.58 | 0     | 1.58  | 0     | 0     | 0     |
| chr16 | 88934186 | 88944185 | 3 | 4 | 5 | 4 | 4 | 4 | 0 | 1 | 0 | 0 | 0 | 0 | 4    | 0.63 | -1.58 | 0     | 1.58  | 0     | 0     | 0     |
| chr16 | 88944186 | 88954585 | 3 | 4 | 5 | 4 | 3 | 3 | 0 | 1 | 0 | 0 | 0 | 0 | 3.67 | 0.82 | -0.82 | 0.41  | 1.63  | 0.41  | -0.82 | -0.82 |
| chr16 | 88954586 | 88964585 | 3 | 3 | 5 | 4 | 3 | 3 | 0 | 1 | 0 | 0 | 0 | 0 | 3.5  | 0.84 | -0.6  | -0.6  | 1.79  | 0.6   | -0.6  | -0.6  |
| chr16 | 88964586 | 90154585 | 3 | 3 | 3 | 3 | 3 | 3 | 0 | 1 | 0 |   |   |   |      |      |       |       |       |       |       |       |



|       |          |          |   |   |   |   |   |   |   |   |   |   |   |      |      |       |       |       |       |       |       |       |
|-------|----------|----------|---|---|---|---|---|---|---|---|---|---|---|------|------|-------|-------|-------|-------|-------|-------|-------|
| chr17 | 80034371 | 81184170 | 4 | 5 | 5 | 5 | 5 | 2 | 2 | 2 | 2 | 2 | 2 | 4.83 | 0.41 | -2.04 | 0.41  | 0.41  | 0.41  | 0.41  | 0.41  | 0.41  |
| chr18 | 19801    | 15381400 | 4 | 3 | 3 | 3 | 3 | 2 | 1 | 1 | 1 | 1 | 1 | 3.17 | 0.41 | 2.04  | -0.41 | -0.41 | -0.41 | -0.41 | -0.41 | -0.41 |
| chr18 | 15381401 | 19009995 | 4 | 3 | 3 | 3 | 3 | 2 | 1 | 1 | 1 | 1 | 1 | 3.17 | 0.41 | 2.04  | -0.41 | -0.41 | -0.41 | -0.41 | -0.41 | -0.41 |
| chr18 | 19009996 | 27010995 | 4 | 3 | 3 | 3 | 3 | 2 | 1 | 1 | 1 | 1 | 1 | 3.17 | 0.41 | 2.04  | -0.41 | -0.41 | -0.41 | -0.41 | -0.41 | -0.41 |
| chr18 | 27010996 | 27020995 | 4 | 3 | 3 | 3 | 3 | 2 | 1 | 1 | 1 | 1 | 1 | 3.17 | 0.41 | 2.04  | -0.41 | -0.41 | -0.41 | -0.41 | -0.41 | -0.41 |
| chr18 | 27020996 | 27191195 | 4 | 3 | 3 | 3 | 3 | 2 | 1 | 1 | 1 | 1 | 1 | 3.17 | 0.41 | 2.04  | -0.41 | -0.41 | -0.41 | -0.41 | -0.41 | -0.41 |
| chr18 | 27191196 | 27201195 | 4 | 3 | 3 | 3 | 3 | 2 | 1 | 1 | 1 | 1 | 1 | 3.17 | 0.41 | 2.04  | -0.41 | -0.41 | -0.41 | -0.41 | -0.41 | -0.41 |
| chr18 | 27201196 | 44624595 | 4 | 3 | 3 | 3 | 3 | 2 | 1 | 1 | 1 | 1 | 1 | 3.17 | 0.41 | 2.04  | -0.41 | -0.41 | -0.41 | -0.41 | -0.41 | -0.41 |
| chr18 | 44624596 | 44634595 | 4 | 3 | 3 | 3 | 3 | 2 | 1 | 1 | 1 | 1 | 1 | 3.17 | 0.41 | 2.04  | -0.41 | -0.41 | -0.41 | -0.41 | -0.41 | -0.41 |
| chr18 | 44634596 | 44744595 | 4 | 3 | 3 | 3 | 3 | 2 | 1 | 1 | 1 | 1 | 1 | 3.17 | 0.41 | 2.04  | -0.41 | -0.41 | -0.41 | -0.41 | -0.41 | -0.41 |
| chr18 | 44744596 | 44754595 | 4 | 3 | 3 | 3 | 3 | 2 | 1 | 1 | 1 | 1 | 1 | 3.17 | 0.41 | 2.04  | -0.41 | -0.41 | -0.41 | -0.41 | -0.41 | -0.41 |
| chr18 | 44754596 | 56276790 | 4 | 3 | 3 | 3 | 3 | 2 | 1 | 1 | 1 | 1 | 1 | 3.17 | 0.41 | 2.04  | -0.41 | -0.41 | -0.41 | -0.41 | -0.41 | -0.41 |
| chr18 | 56276791 | 56696790 | 4 | 3 | 3 | 3 | 3 | 2 | 1 | 1 | 1 | 1 | 1 | 3.17 | 0.41 | 2.04  | -0.41 | -0.41 | -0.41 | -0.41 | -0.41 | -0.41 |
| chr18 | 56696791 | 56706790 | 4 | 3 | 3 | 3 | 3 | 2 | 1 | 1 | 1 | 1 | 1 | 3.17 | 0.41 | 2.04  | -0.41 | -0.41 | -0.41 | -0.41 | -0.41 | -0.41 |
| chr18 | 56706791 | 67815390 | 4 | 3 | 3 | 3 | 3 | 2 | 1 | 1 | 1 | 1 | 1 | 3.17 | 0.41 | 2.04  | -0.41 | -0.41 | -0.41 | -0.41 | -0.41 | -0.41 |
| chr18 | 67815391 | 67825390 | 4 | 3 | 3 | 3 | 3 | 2 | 1 | 1 | 1 | 1 | 1 | 3.17 | 0.41 | 2.04  | -0.41 | -0.41 | -0.41 | -0.41 | -0.41 | -0.41 |
| chr18 | 67825391 | 68135390 | 4 | 3 | 3 | 3 | 3 | 2 | 1 | 1 | 1 | 1 | 1 | 3.17 | 0.41 | 2.04  | -0.41 | -0.41 | -0.41 | -0.41 | -0.41 | -0.41 |
| chr18 | 68135391 | 68145390 | 4 | 3 | 3 | 3 | 3 | 2 | 1 | 1 | 1 | 1 | 1 | 3.17 | 0.41 | 2.04  | -0.41 | -0.41 | -0.41 | -0.41 | -0.41 | -0.41 |
| chr18 | 68145391 | 68825390 | 4 | 3 | 3 | 3 | 3 | 2 | 1 | 1 | 1 | 1 | 1 | 3.17 | 0.41 | 2.04  | -0.41 | -0.41 | -0.41 | -0.41 | -0.41 | -0.41 |
| chr18 | 68825391 | 68835390 | 4 | 3 | 3 | 3 | 3 | 2 | 1 | 1 | 1 | 1 | 1 | 3.17 | 0.41 | 2.04  | -0.41 | -0.41 | -0.41 | -0.41 | -0.41 | -0.41 |
| chr18 | 68835391 | 69285390 | 4 | 3 | 3 | 3 | 3 | 2 | 1 | 1 | 1 | 1 | 1 | 3.17 | 0.41 | 2.04  | -0.41 | -0.41 | -0.41 | -0.41 | -0.41 | -0.41 |
| chr18 | 69285391 | 69295390 | 4 | 3 | 3 | 3 | 3 | 2 | 1 | 1 | 1 | 1 | 1 | 3.17 | 0.41 | 2.04  | -0.41 | -0.41 | -0.41 | -0.41 | -0.41 | -0.41 |
| chr18 | 69295391 | 74535585 | 4 | 3 | 3 | 3 | 3 | 2 | 1 | 1 | 1 | 1 | 1 | 3.17 | 0.41 | 2.04  | -0.41 | -0.41 | -0.41 | -0.41 | -0.41 | -0.41 |
| chr18 | 74535586 | 74545585 | 4 | 3 | 3 | 3 | 3 | 2 | 1 | 1 | 1 | 1 | 1 | 3.17 | 0.41 | 2.04  | -0.41 | -0.41 | -0.41 | -0.41 | -0.41 | -0.41 |
| chr18 | 74545586 | 74855785 | 4 | 3 | 3 | 3 | 3 | 2 | 1 | 1 | 1 | 1 | 1 | 3.17 | 0.41 | 2.04  | -0.41 | -0.41 | -0.41 | -0.41 | -0.41 | -0.41 |
| chr18 | 74855786 | 74865785 | 4 | 3 | 3 | 3 | 3 | 2 | 1 | 1 | 1 | 1 | 1 | 3.17 | 0.41 | 2.04  | -0.41 | -0.41 | -0.41 | -0.41 | -0.41 | -0.41 |
| chr18 | 74865786 | 75065785 | 4 | 3 | 3 | 3 | 3 | 2 | 1 | 1 | 1 | 1 | 1 | 3.17 | 0.41 | 2.04  | -0.41 | -0.41 | -0.41 | -0.41 | -0.41 | -0.41 |
| chr18 | 75065786 | 75075785 | 4 | 3 | 3 | 3 | 3 | 2 | 1 | 1 | 1 | 1 | 1 | 3.17 | 0.41 | 2.04  | -0.41 | -0.41 | -0.41 | -0.41 | -0.41 | -0.41 |
| chr18 | 75075786 | 76786785 | 4 | 3 | 3 | 3 | 3 | 2 | 1 | 1 | 1 | 1 | 1 | 3.17 | 0.41 | 2.04  | -0.41 | -0.41 | -0.41 | -0.41 | -0.41 | -0.41 |
| chr18 | 76786786 | 76796785 | 4 | 3 | 3 | 3 | 3 | 2 | 1 | 1 | 1 | 1 | 1 | 3.17 | 0.41 | 2.04  | -0.41 | -0.41 | -0.41 | -0.41 | -0.41 | -0.41 |
| chr18 | 76796786 | 78006785 | 4 | 3 | 3 | 3 | 3 | 2 | 1 | 1 | 1 | 1 | 1 | 3.17 | 0.41 | 2.04  | -0.41 | -0.41 | -0.41 | -0.41 | -0.41 | -0.41 |
| chr19 | 69801    | 190000   | 3 | 4 | 3 | 4 | 4 | 1 | 2 | 0 | 2 | 2 | 2 | 3.67 | 0.52 | -1.29 | 0.65  | -1.29 | 0.65  | 0.65  | 0.65  | 0.65  |
| chr19 | 190001   | 200000   | 3 | 4 | 3 | 4 | 4 | 1 | 2 | 0 | 2 | 2 | 2 | 3.67 | 0.52 | -1.29 | 0.65  | -1.29 | 0.65  | 0.65  | 0.65  | 0.65  |
| chr19 | 200001   | 219800   | 3 | 4 | 3 | 4 | 3 | 1 | 2 | 0 | 2 | 0 | 2 | 3.5  | 0.55 | -0.91 | 0.91  | -0.91 | 0.91  | -0.91 | 0.91  | 0.91  |
| chr19 | 219801   | 439800   | 3 | 3 | 3 | 3 | 3 | 1 | 1 | 0 | 0 | 0 | 0 | 3    | 0    | 0     | 0     | 0     | 0     | 0     | 0     | 0     |
| chr19 | 439801   | 449800   | 3 | 3 | 3 | 3 | 3 | 1 | 1 | 0 | 0 | 0 | 0 | 3    | 0    | 0     | 0     | 0     | 0     | 0     | 0     | 0     |
| chr19 | 449801   | 470000   | 3 | 4 | 4 | 3 | 5 | 1 | 1 | 0 | 0 | 0 | 0 | 3.83 | 0.75 | -1.11 | 0.22  | 0.22  | -1.11 | 1.55  | 0.22  | 0.22  |
| chr19 | 470001   | 480000   | 3 | 4 | 4 | 3 | 5 | 1 | 1 | 0 | 0 | 0 | 0 | 3.83 | 0.75 | -1.11 | 0.22  | 0.22  | -1.11 | 1.55  | 0.22  | 0.22  |
| chr19 | 480001   | 870000   | 3 | 4 | 4 | 4 | 5 | 1 | 1 | 0 | 0 | 0 | 0 | 4    | 0.63 | -1.58 | 0     | 0     | 0     | 1.58  | 0     | 0     |
| chr19 | 870001   | 880000   | 3 | 4 | 4 | 4 | 5 | 1 | 1 | 0 | 0 | 0 | 0 | 4    | 0.63 | -1.58 | 0     | 0     | 0     | 1.58  | 0     | 0     |
| chr19 | 880001   | 6981400  | 3 | 3 | 3 | 3 | 3 | 1 | 1 | 0 | 0 | 0 | 0 | 3    | 0    | 0     | 0     | 0     | 0     | 0     | 0     | 0     |
| chr19 | 6981401  | 6991400  | 3 | 3 | 3 | 3 | 3 | 1 | 1 | 0 | 0 | 0 | 0 | 3    | 0    | 0     | 0     | 0     | 0     | 0     | 0     | 0     |
| chr19 | 6991401  | 7071400  | 3 | 3 | 3 | 3 | 3 | 1 | 1 | 0 | 0 | 0 | 0 | 3    | 0    | 0     | 0     | 0     | 0     | 0     | 0     | 0     |
| chr19 | 7071401  | 7081400  | 3 | 3 | 3 | 3 | 3 | 1 | 1 | 0 | 0 | 0 | 0 | 3    | 0    | 0     | 0     | 0     | 0     | 0     | 0     | 0     |
| chr19 | 7081401  | 7290800  | 3 | 3 | 3 | 3 | 3 | 1 | 1 | 0 | 0 | 0 | 0 | 3    | 0    | 0     | 0     | 0     | 0     | 0     | 0     | 0     |
| chr19 | 7290801  | 7300800  | 3 | 3 | 3 | 3 | 3 | 1 | 1 | 0 | 0 | 0 | 0 | 3    | 0    | 0     | 0     | 0     | 0     | 0     | 0     | 0     |
| chr19 | 7300801  | 7311000  | 3 | 3 | 5 | 3 | 5 | 1 | 1 | 1 | 0 | 1 | 1 | 4    | 1.1  | -0.91 | -0.91 | 0.91  | -0.91 | 0.91  | 0.91  | 0.91  |
| chr19 | 7311001  | 7340800  | 4 | 5 | 5 | 6 | 5 | 2 | 2 | 1 | 3 | 1 | 1 | 5    | 0.63 | -1.58 | 0     | 0     | 1.58  | 0     | 0     | 0     |
| chr19 | 7340801  | 7401195  | 4 | 5 | 5 | 6 | 5 | 2 | 2 | 1 | 3 | 1 | 1 | 5    | 0.63 | -1.58 | 0     | 0     | 1.58  | 0     | 0     | 0     |
| chr19 | 7401196  | 7411395  | 4 | 5 | 3 | 6 | 3 | 2 | 2 | 0 | 3 | 0 | 0 | 4    | 1.26 | 0     | 0.79  | -0.79 | 1.58  | -0.79 | -0.79 | -0.79 |
| chr19 | 7411396  | 8841390  | 3 | 3 | 3 | 3 | 3 | 1 | 1 | 0 | 0 | 0 | 0 | 3    | 0    | 0     | 0     | 0     | 0     | 0     | 0     | 0     |
| chr19 | 8841391  | 8851390  | 3 | 3 | 3 | 3 | 3 | 1 | 1 | 0 | 0 | 0 | 0 | 3    | 0    | 0     | 0     | 0     | 0     | 0     | 0     | 0     |
| chr19 | 8851391  | 8861990  | 2 | 2 | 2 | 2 | 2 | 1 | 0 | 0 | 0 | 1 | 0 | 2.17 | 0.41 | -0.41 | -0.41 | -0.41 | -0.41 | -0.41 | 2.04  | 2.04  |
| chr19 | 8861991  | 8891990  | 2 | 2 | 2 | 2 | 2 | 1 | 0 | 0 | 0 | 1 | 0 | 2    | 0    | 0     | 0     | 0     | 0     | 0     | 0     | 0     |
| chr19 | 8891991  | 8901990  | 2 | 2 | 2 | 2 | 2 | 1 | 0 | 0 | 0 | 1 | 0 | 2    | 0    | 0     | 0     | 0     | 0     | 0     | 0     | 0     |
| chr19 | 8901991  | 8911990  | 3 | 3 | 3 | 3 | 3 | 2 | 0 | 1 | 0 | 0 | 0 | 2.83 | 0.41 | 0.41  | 0.41  | 0.41  | 0.41  | 0.41  | 0.41  | -2.04 |
| chr19 | 8911991  | 9391990  | 3 | 3 | 3 | 3 | 3 | 0 | 1 | 0 | 0 | 0 | 0 | 3    | 0    | 0     | 0     | 0     | 0     | 0     | 0     | 0     |
| chr19 | 9391991  | 9401990  | 3 | 3 | 3 | 3 | 3 | 0 | 1 | 0 | 0 | 0 | 0 | 3    | 0    | 0     | 0     | 0     | 0     | 0     | 0     | 0     |
| chr19 | 9401991  | 17664790 | 3 | 3 | 3 | 3 | 3 | 0 | 1 | 0 | 0 | 0 | 0 | 3    | 0    | 0     | 0     | 0     | 0     | 0     | 0     | 0     |
| chr19 | 17664791 | 17674790 | 3 | 3 | 3 | 3 | 3 | 0 | 1 | 0 | 0 | 0 | 0 | 3    | 0    | 0     | 0     | 0     | 0     | 0     | 0     | 0     |
| chr19 | 17674791 | 17864390 | 3 | 3 | 3 | 3 | 3 | 0 | 1 | 0 | 0 | 0 | 0 | 3    | 0    | 0     | 0     | 0     | 0     | 0     | 0     | 0     |
| chr19 | 17864391 | 17874390 | 3 | 3 | 3 | 3 | 3 | 0 | 1 | 0 | 0 | 0 | 0 | 3    | 0    | 0     | 0     | 0     | 0     | 0     | 0     | 0     |
| chr19 | 17874391 | 18054790 | 4 | 4 | 3 | 3 | 4 | 1 | 1 | 0 | 0 | 1 | 1 | 3.67 | 0.52 | 0.65  | 0.65  | -1.29 | 0.65  | 0.65  | 0.65  | 0.65  |
| chr19 | 18054791 | 18064790 | 4 | 4 | 3 | 4 | 4 | 1 | 1 | 0 | 1 | 1 | 1 | 3.83 | 0.41 | 0.41  | 0.41  | -2.04 | 0.41  | 0.41  | 0.41  | 0.41  |
| chr19 | 18064791 | 18654390 | 4 | 4 | 3 | 4 | 4 | 1 | 1 | 0 | 1 | 1 | 1 | 3.83 | 0.41 | 0.41  | 0.41  | -2.04 | 0.41  | 0.41  | 0.41  | 0.41  |
| chr19 | 18654391 | 18664390 | 4 | 4 | 3 | 4 | 4 | 1 | 1 | 0 | 1 | 1 | 1 | 3.83 | 0.41 | 0.41  | 0.41  | -2.04 | 0.41  | 0.41  | 0.41  | 0.41  |
| chr19 | 18664391 | 19684390 | 4 | 4 | 3 | 5 | 4 | 1 | 1 | 0 | 2 | 1 | 2 | 4.17 | 0.75 | -0.22 | -0.22 | -1.55 | 1.11  | -0.22 | 1.11  | 1.11  |
| chr19 | 19684391 | 19694390 | 4 | 4 | 3 | 5 | 4 | 1 | 1 | 0 | 2 | 1 | 2 | 4.17 | 0.75 | -0.22 | -0.22 | -1.55 | 1.11  | -0.22 | 1.11  | 1.11  |
| chr19 | 19694391 | 20195190 | 4 | 4 | 3 | 3 | 4 | 1 | 1 | 0 | 0 | 1 | 0 | 3.5  | 0.55 | 0.91  | 0.91  | -0.91 | -0.91 | 0.91  | -0.91 | -0.91 |
| chr19 | 20195191 | 20205190 | 4 | 4 | 3 | 3 | 4 | 1 | 1 | 0 | 0 | 1 | 0 | 3.5  | 0.55 | 0.91  | 0.91  | -0.91 | -0.91 | 0.91  | -0.91 |       |

|       |          |          |   |   |   |   |   |   |   |   |   |   |   |   |      |      |       |       |       |       |       |       |
|-------|----------|----------|---|---|---|---|---|---|---|---|---|---|---|---|------|------|-------|-------|-------|-------|-------|-------|
| chr19 | 32770186 | 33060185 | 5 | 4 | 5 | 5 | 5 | 5 | 2 | 2 | 2 | 2 | 2 | 2 | 4.83 | 0.41 | 0.41  | -2.04 | 0.41  | 0.41  | 0.41  | 0.41  |
| chr19 | 33060186 | 33070185 | 5 | 4 | 5 | 5 | 5 | 5 | 2 | 2 | 2 | 2 | 2 | 2 | 4.83 | 0.41 | 0.41  | -2.04 | 0.41  | 0.41  | 0.41  | 0.41  |
| chr19 | 33070186 | 34020185 | 5 | 4 | 5 | 5 | 5 | 5 | 2 | 2 | 2 | 2 | 2 | 2 | 4.83 | 0.41 | 0.41  | -2.04 | 0.41  | 0.41  | 0.41  | 0.41  |
| chr19 | 34020186 | 34030185 | 5 | 4 | 5 | 5 | 5 | 5 | 2 | 2 | 2 | 2 | 2 | 2 | 4.83 | 0.41 | 0.41  | -2.04 | 0.41  | 0.41  | 0.41  | 0.41  |
| chr19 | 34030186 | 34450185 | 5 | 4 | 5 | 5 | 5 | 5 | 2 | 2 | 2 | 2 | 2 | 2 | 4.83 | 0.41 | 0.41  | -2.04 | 0.41  | 0.41  | 0.41  | 0.41  |
| chr19 | 34450186 | 34460185 | 5 | 4 | 5 | 5 | 5 | 5 | 2 | 2 | 2 | 2 | 2 | 2 | 4.83 | 0.41 | 0.41  | -2.04 | 0.41  | 0.41  | 0.41  | 0.41  |
| chr19 | 34460186 | 34980185 | 5 | 4 | 5 | 5 | 5 | 5 | 2 | 2 | 2 | 2 | 2 | 2 | 4.83 | 0.41 | 0.41  | -2.04 | 0.41  | 0.41  | 0.41  | 0.41  |
| chr19 | 34980186 | 34990185 | 5 | 4 | 5 | 5 | 5 | 5 | 2 | 2 | 2 | 2 | 2 | 2 | 4.83 | 0.41 | 0.41  | -2.04 | 0.41  | 0.41  | 0.41  | 0.41  |
| chr19 | 34990186 | 35050185 | 5 | 4 | 5 | 5 | 5 | 5 | 2 | 2 | 2 | 2 | 2 | 2 | 4.83 | 0.41 | 0.41  | -2.04 | 0.41  | 0.41  | 0.41  | 0.41  |
| chr19 | 35050186 | 35060185 | 5 | 4 | 5 | 5 | 5 | 5 | 2 | 2 | 2 | 2 | 2 | 2 | 4.83 | 0.41 | 0.41  | -2.04 | 0.41  | 0.41  | 0.41  | 0.41  |
| chr19 | 35060186 | 36939985 | 5 | 4 | 5 | 5 | 5 | 5 | 2 | 2 | 2 | 2 | 2 | 2 | 4.83 | 0.41 | 0.41  | -2.04 | 0.41  | 0.41  | 0.41  | 0.41  |
| chr19 | 36939986 | 37339985 | 5 | 5 | 5 | 5 | 5 | 5 | 2 | 2 | 2 | 2 | 2 | 2 | 5    | 0    | 0     | 0     | 0     | 0     | 0     | 0     |
| chr19 | 37339986 | 37349985 | 5 | 5 | 5 | 5 | 5 | 5 | 2 | 2 | 2 | 2 | 2 | 2 | 5    | 0    | 0     | 0     | 0     | 0     | 0     | 0     |
| chr19 | 37349986 | 38310185 | 5 | 5 | 5 | 5 | 5 | 5 | 2 | 2 | 2 | 2 | 2 | 2 | 5    | 0    | 0     | 0     | 0     | 0     | 0     | 0     |
| chr19 | 38310186 | 38320185 | 5 | 5 | 5 | 5 | 5 | 5 | 2 | 2 | 2 | 2 | 2 | 2 | 5    | 0    | 0     | 0     | 0     | 0     | 0     | 0     |
| chr19 | 38320186 | 38380185 | 5 | 5 | 5 | 5 | 5 | 5 | 2 | 2 | 2 | 2 | 2 | 2 | 5    | 0    | 0     | 0     | 0     | 0     | 0     | 0     |
| chr19 | 38380186 | 38390185 | 5 | 5 | 5 | 5 | 5 | 5 | 2 | 2 | 2 | 2 | 2 | 2 | 5    | 0    | 0     | 0     | 0     | 0     | 0     | 0     |
| chr19 | 38390186 | 41930185 | 5 | 5 | 5 | 5 | 5 | 5 | 2 | 2 | 2 | 2 | 2 | 2 | 5    | 0    | 0     | 0     | 0     | 0     | 0     | 0     |
| chr19 | 41930186 | 41940185 | 5 | 5 | 5 | 5 | 5 | 5 | 2 | 2 | 2 | 2 | 2 | 2 | 5    | 0    | 0     | 0     | 0     | 0     | 0     | 0     |
| chr19 | 41940186 | 42320185 | 5 | 5 | 5 | 5 | 5 | 5 | 2 | 2 | 2 | 2 | 2 | 2 | 5    | 0    | 0     | 0     | 0     | 0     | 0     | 0     |
| chr19 | 42320186 | 42330185 | 5 | 5 | 5 | 5 | 5 | 5 | 2 | 2 | 2 | 2 | 2 | 2 | 5    | 0    | 0     | 0     | 0     | 0     | 0     | 0     |
| chr19 | 42330186 | 43050185 | 5 | 5 | 5 | 5 | 5 | 5 | 2 | 2 | 2 | 2 | 2 | 2 | 5    | 0    | 0     | 0     | 0     | 0     | 0     | 0     |
| chr19 | 43050186 | 43060185 | 5 | 5 | 5 | 5 | 5 | 5 | 2 | 2 | 2 | 2 | 2 | 2 | 5    | 0    | 0     | 0     | 0     | 0     | 0     | 0     |
| chr19 | 43060186 | 43220385 | 5 | 5 | 5 | 5 | 5 | 5 | 2 | 2 | 2 | 2 | 2 | 2 | 5    | 0    | 0     | 0     | 0     | 0     | 0     | 0     |
| chr19 | 43220386 | 43410185 | 5 | 5 | 5 | 5 | 5 | 5 | 2 | 2 | 2 | 2 | 2 | 2 | 5    | 0    | 0     | 0     | 0     | 0     | 0     | 0     |
| chr19 | 43410186 | 43420185 | 5 | 5 | 5 | 5 | 5 | 5 | 2 | 2 | 2 | 2 | 2 | 2 | 5    | 0    | 0     | 0     | 0     | 0     | 0     | 0     |
| chr19 | 43420186 | 43449985 | 5 | 5 | 5 | 5 | 5 | 5 | 2 | 2 | 2 | 2 | 2 | 2 | 5    | 0    | 0     | 0     | 0     | 0     | 0     | 0     |
| chr19 | 43449986 | 43459985 | 5 | 5 | 5 | 5 | 5 | 5 | 2 | 2 | 2 | 2 | 2 | 2 | 5    | 0    | 0     | 0     | 0     | 0     | 0     | 0     |
| chr19 | 43459986 | 43629985 | 5 | 4 | 4 | 4 | 5 | 5 | 2 | 2 | 1 | 1 | 2 | 2 | 4.5  | 0.55 | 0.91  | -0.91 | -0.91 | -0.91 | 0.91  | 0.91  |
| chr19 | 43629986 | 43639985 | 5 | 4 | 4 | 4 | 5 | 5 | 2 | 2 | 1 | 1 | 2 | 2 | 4.5  | 0.55 | 0.91  | -0.91 | -0.91 | -0.91 | 0.91  | 0.91  |
| chr19 | 43639986 | 43690385 | 5 | 5 | 4 | 5 | 5 | 5 | 2 | 2 | 1 | 2 | 2 | 2 | 4.83 | 0.41 | 0.41  | 0.41  | -2.04 | 0.41  | 0.41  | 0.41  |
| chr19 | 43690386 | 43700385 | 5 | 5 | 4 | 5 | 5 | 5 | 2 | 2 | 1 | 2 | 2 | 2 | 4.83 | 0.41 | 0.41  | 0.41  | -2.04 | 0.41  | 0.41  | 0.41  |
| chr19 | 43700386 | 43720185 | 6 | 5 | 6 | 5 | 5 | 5 | 1 | 2 | 0 | 2 | 2 | 2 | 5.33 | 0.52 | 1.29  | -0.65 | 1.29  | -0.65 | -0.65 | -0.65 |
| chr19 | 43720186 | 43760185 | 6 | 5 | 6 | 5 | 5 | 6 | 1 | 2 | 0 | 2 | 2 | 1 | 5.5  | 0.55 | 0.91  | -0.91 | 0.91  | -0.91 | -0.91 | 0.91  |
| chr19 | 43760186 | 43770185 | 6 | 5 | 6 | 4 | 5 | 6 | 1 | 2 | 0 | 1 | 2 | 1 | 5.33 | 0.82 | 0.82  | -0.41 | 0.82  | -1.63 | -0.41 | 0.82  |
| chr19 | 43770186 | 43929985 | 5 | 5 | 5 | 4 | 5 | 5 | 2 | 2 | 2 | 1 | 2 | 2 | 4.83 | 0.41 | 0.41  | 0.41  | 0.41  | -2.04 | 0.41  | 0.41  |
| chr19 | 43929986 | 43939985 | 5 | 5 | 5 | 4 | 5 | 5 | 2 | 2 | 2 | 1 | 2 | 2 | 4.83 | 0.41 | 0.41  | 0.41  | 0.41  | -2.04 | 0.41  | 0.41  |
| chr19 | 43939986 | 59101185 | 5 | 5 | 5 | 5 | 5 | 5 | 2 | 2 | 2 | 2 | 2 | 2 | 5    | 0    | 0     | 0     | 0     | 0     | 0     | 0     |
| chr20 | 69801    | 1541200  | 4 | 5 | 5 | 5 | 5 | 5 | 2 | 2 | 2 | 2 | 2 | 2 | 4.83 | 0.41 | -2.04 | 0.41  | 0.41  | 0.41  | 0.41  | 0.41  |
| chr20 | 1541201  | 1551200  | 4 | 5 | 5 | 5 | 5 | 5 | 2 | 2 | 2 | 2 | 2 | 2 | 4.83 | 0.41 | -2.04 | 0.41  | 0.41  | 0.41  | 0.41  | 0.41  |
| chr20 | 1551201  | 1591200  | 4 | 4 | 5 | 5 | 4 | 5 | 2 | 2 | 2 | 2 | 2 | 2 | 4.5  | 0.55 | -0.91 | -0.91 | 0.91  | 0.91  | -0.91 | 0.91  |
| chr20 | 1591201  | 1601200  | 4 | 4 | 5 | 5 | 4 | 5 | 2 | 2 | 2 | 2 | 2 | 2 | 4.5  | 0.55 | -0.91 | -0.91 | 0.91  | 0.91  | -0.91 | 0.91  |
| chr20 | 1601201  | 17491400 | 4 | 5 | 5 | 5 | 5 | 5 | 2 | 2 | 2 | 2 | 2 | 2 | 4.83 | 0.41 | -2.04 | 0.41  | 0.41  | 0.41  | 0.41  | 0.41  |
| chr20 | 17491401 | 17501400 | 4 | 5 | 5 | 5 | 5 | 5 | 2 | 2 | 2 | 2 | 2 | 2 | 4.83 | 0.41 | -2.04 | 0.41  | 0.41  | 0.41  | 0.41  | 0.41  |
| chr20 | 17501401 | 17981400 | 4 | 5 | 5 | 5 | 5 | 5 | 2 | 2 | 2 | 2 | 2 | 2 | 4.83 | 0.41 | -2.04 | 0.41  | 0.41  | 0.41  | 0.41  | 0.41  |
| chr20 | 17981401 | 17991400 | 4 | 5 | 5 | 5 | 5 | 5 | 2 | 2 | 2 | 2 | 2 | 2 | 4.83 | 0.41 | -2.04 | 0.41  | 0.41  | 0.41  | 0.41  | 0.41  |
| chr20 | 17991401 | 22433800 | 4 | 5 | 5 | 5 | 5 | 5 | 2 | 2 | 2 | 2 | 2 | 2 | 4.83 | 0.41 | -2.04 | 0.41  | 0.41  | 0.41  | 0.41  | 0.41  |
| chr20 | 22433801 | 22443800 | 4 | 5 | 5 | 5 | 5 | 5 | 2 | 2 | 2 | 2 | 2 | 2 | 4.83 | 0.41 | -2.04 | 0.41  | 0.41  | 0.41  | 0.41  | 0.41  |
| chr20 | 22443801 | 22533800 | 4 | 5 | 5 | 5 | 6 | 5 | 2 | 2 | 2 | 2 | 2 | 2 | 5    | 0.63 | -1.58 | 0     | 0     | 0     | 1.58  | 0     |
| chr20 | 22533801 | 22543800 | 4 | 5 | 5 | 5 | 6 | 5 | 2 | 2 | 2 | 2 | 2 | 2 | 5    | 0.63 | -1.58 | 0     | 0     | 0     | 1.58  | 0     |
| chr20 | 22543801 | 25584400 | 4 | 5 | 5 | 5 | 5 | 5 | 2 | 2 | 2 | 2 | 2 | 2 | 4.83 | 0.41 | -2.04 | 0.41  | 0.41  | 0.41  | 0.41  | 0.41  |
| chr20 | 25584401 | 29429595 | - | 5 | - | - | 5 | 5 | - | - | 2 | - | 2 | 2 | -    | -    | -     | -     | -     | -     | -     | -     |
| chr20 | 29429596 | 29649595 | 4 | 5 | 5 | 4 | 5 | 5 | 2 | 2 | 2 | 1 | 2 | 2 | 4.67 | 0.52 | -1.29 | 0.65  | 0.65  | -1.29 | 0.65  | 0.65  |
| chr20 | 29649596 | 57402390 | 4 | 5 | 5 | 5 | 5 | 5 | 2 | 2 | 2 | 2 | 2 | 2 | 4.83 | 0.41 | -2.04 | 0.41  | 0.41  | 0.41  | 0.41  | 0.41  |
| chr20 | 57402391 | 57652390 | 4 | 5 | 5 | 5 | 5 | 5 | 2 | 2 | 2 | 2 | 2 | 2 | 4.83 | 0.41 | -2.04 | 0.41  | 0.41  | 0.41  | 0.41  | 0.41  |
| chr20 | 57652391 | 57662390 | 4 | 5 | 5 | 5 | 5 | 5 | 2 | 2 | 2 | 2 | 2 | 2 | 4.83 | 0.41 | -2.04 | 0.41  | 0.41  | 0.41  | 0.41  | 0.41  |
| chr20 | 57662391 | 62952980 | 4 | 5 | 5 | 5 | 5 | 5 | 2 | 2 | 2 | 2 | 2 | 2 | 4.83 | 0.41 | -2.04 | 0.41  | 0.41  | 0.41  | 0.41  | 0.41  |
| chr21 | 9420991  | 9841380  | 4 | 5 | 5 | 5 | 5 | 5 | 2 | 2 | 1 | 1 | 2 | 1 | 4.83 | 0.41 | -2.04 | 0.41  | 0.41  | 0.41  | 0.41  | 0.41  |
| chr21 | 9841381  | 9851380  | 4 | 5 | 5 | 5 | 5 | 5 | 2 | 2 | 1 | 1 | 2 | 1 | 4.83 | 0.41 | -2.04 | 0.41  | 0.41  | 0.41  | 0.41  | 0.41  |
| chr21 | 9851381  | 9991380  | 4 | 5 | 5 | 5 | 4 | 5 | 2 | 2 | 1 | 1 | 1 | 2 | 4.67 | 0.52 | -1.29 | 0.65  | 0.65  | 0.65  | -1.29 | 0.65  |
| chr21 | 9991381  | 10371775 | 3 | 4 | 4 | 4 | 4 | 5 | 1 | 2 | 0 | 1 | 1 | 2 | 4    | 0.63 | -1.58 | 0     | 0     | 0     | 0     | 1.58  |
| chr21 | 10371776 | 10881970 | 3 | 4 | 4 | 4 | 4 | 4 | 1 | 2 | 0 | 1 | 1 | 1 | 3.83 | 0.41 | -2.04 | 0.41  | 0.41  | 0.41  | 0.41  | 0.41  |
| chr21 | 10881971 | 14348165 | 3 | 4 | 4 | 4 | 4 | 4 | 1 | 2 | 0 | 1 | 1 | 1 | 3.83 | 0.41 | -2.04 | 0.41  | 0.41  | 0.41  | 0.41  | 0.41  |
| chr21 | 14348166 | 15031165 | 4 | 4 | 4 | 4 | 4 | 4 | 2 | 2 | 2 | 2 | 2 | 2 | 4    | 0    | 0     | 0     | 0     | 0     | 0     | 0     |
| chr21 | 15031166 | 15072565 | 5 | 4 | 4 | 4 | 4 | 4 | 2 | 2 | 2 | 2 | 2 | 2 | 4.17 | 0.41 | 2.04  | -0.41 | -0.41 | -0.41 | -0.41 | -0.41 |
| chr21 | 15072566 | 15082565 | 5 | 4 | 4 | 4 | 4 | 4 | 2 | 2 | 2 | 2 | 2 | 2 | 4.17 | 0.41 | 2.04  | -0.41 | -0.41 | -0.41 | -0.41 | -0.41 |
| chr21 | 15082566 | 30254765 | 4 | 4 | 4 | 4 | 4 | 4 | 2 | 2 | 2 | 2 | 2 | 2 | 4    | 0    | 0     | 0     | 0     | 0     | 0     | 0     |
| chr21 | 30254766 | 30314765 | 4 | 4 | 4 | 4 | 4 | 4 | 2 | 2 | 2 | 2 | 2 | 2 | 4    | 0    | 0     | 0     | 0     | 0     | 0     | 0     |
| chr21 | 30314766 | 30324765 | 4 | 4 | 5 | 4 | 4 | 4 | 2 | 2 | 2 | 2 | 2 | 2 | 4.17 | 0.41 | -0.41 | -0.41 | 2.04  | -0.41 | -0.41 | -0.41 |
| chr21 | 30324766 | 30594365 | 4 | 4 | 5 | 4 | 4 | 4 | 2 | 2 | 2 | 2 | 2 | 2 | 4.17 | 0.41 | -0.41 | -0.41 | 2.04  | -0.41 | -0.41 | -0.41 |
| chr21 | 30594366 | 30604365 | 4 | 4 | 5 | 4 | 4 | 4 | 2 | 2 | 2 | 2 | 2 | 2 | 4.17 | 0.41 | -0.41 | -0.41 | 2.04  | -0    |       |       |



|      |          |          |   |   |   |   |   |   |   |   |   |   |   |   |      |      |       |       |       |       |       |       |
|------|----------|----------|---|---|---|---|---|---|---|---|---|---|---|---|------|------|-------|-------|-------|-------|-------|-------|
| chrY | 1284376  | 1294375  | 3 | 3 | 3 | 4 | 3 | 4 | 1 | 1 | 1 | 2 | 1 | 2 | 3.33 | 0.52 | -0.65 | -0.65 | -0.65 | 1.29  | -0.65 | 1.29  |
| chrY | 1294376  | 2646970  | 3 | 3 | 3 | 4 | 3 | 4 | 1 | 1 | 1 | 2 | 1 | 2 | 3.33 | 0.52 | -0.65 | -0.65 | -0.65 | 1.29  | -0.65 | 1.29  |
| chrY | 2646971  | 2656970  | 3 | 3 | 3 | 4 | 3 | 4 | 1 | 1 | 1 | 2 | 1 | 2 | 3.33 | 0.52 | -0.65 | -0.65 | -0.65 | 1.29  | -0.65 | 1.29  |
| chrY | 2656971  | 2667970  | 4 | 2 | 2 | 4 | 2 | 2 | 2 | 1 | 1 | 2 | 1 | 1 | 2.67 | 1.03 | 1.29  | -0.65 | -0.65 | 1.29  | -0.65 | -0.65 |
| chrY | 2667971  | 7458570  | 4 | 2 | 2 | 2 | 2 | 2 | 2 | 1 | 1 | 1 | 1 | 1 | 2.33 | 0.82 | 2.04  | -0.41 | -0.41 | -0.41 | -0.41 | -0.41 |
| chrY | 7458571  | 7468570  | 4 | 2 | 2 | 2 | 2 | 2 | 2 | 1 | 1 | 1 | 1 | 1 | 2.33 | 0.82 | 2.04  | -0.41 | -0.41 | -0.41 | -0.41 | -0.41 |
| chrY | 7468571  | 7508570  | 4 | 2 | 2 | 2 | 2 | 4 | 2 | 1 | 1 | 1 | 1 | 2 | 2.67 | 1.03 | 1.29  | -0.65 | -0.65 | -0.65 | -0.65 | 1.29  |
| chrY | 7508571  | 7518570  | 4 | 2 | 2 | 2 | 2 | 4 | 2 | 1 | 1 | 1 | 1 | 2 | 2.67 | 1.03 | 1.29  | -0.65 | -0.65 | -0.65 | -0.65 | 1.29  |
| chrY | 7518571  | 9898965  | 4 | 2 | 2 | 2 | 2 | 2 | 2 | 1 | 1 | 1 | 1 | 1 | 2.33 | 0.82 | 2.04  | -0.41 | -0.41 | -0.41 | -0.41 | -0.41 |
| chrY | 9898966  | 9908965  | 4 | 2 | 2 | 2 | 2 | 2 | 2 | 1 | 1 | 1 | 1 | 1 | 2.33 | 0.82 | 2.04  | -0.41 | -0.41 | -0.41 | -0.41 | -0.41 |
| chrY | 9908966  | 9918965  | 4 | 4 | 3 | 2 | 4 | 2 | 2 | 1 | 0 | 1 | 1 | 1 | 3.17 | 0.98 | 0.85  | 0.85  | -0.17 | -1.19 | 0.85  | -1.19 |
| chrY | 9918966  | 9929765  | 4 | 4 | 3 | 2 | 4 | 4 | 2 | 1 | 0 | 1 | 1 | 1 | 3.5  | 0.84 | 0.6   | 0.6   | -0.6  | -1.79 | 0.6   | 0.6   |
| chrY | 9929766  | 9939765  | 4 | 4 | 3 | 2 | 4 | 4 | 2 | 1 | 0 | 1 | 1 | 1 | 3.5  | 0.84 | 0.6   | 0.6   | -0.6  | -1.79 | 0.6   | 0.6   |
| chrY | 9939766  | 10089165 | 4 | 4 | 3 | 3 | 4 | 4 | 2 | 1 | 0 | 0 | 1 | 1 | 3.67 | 0.52 | 0.65  | 0.65  | -1.29 | -1.29 | 0.65  | 0.65  |
| chrY | 10089166 | 13409955 | 4 | 4 | 3 | 3 | 4 | 4 | 2 | 1 | 0 | 0 | 1 | 1 | 3.67 | 0.52 | 0.65  | 0.65  | -1.29 | -1.29 | 0.65  | 0.65  |
| chrY | 13409956 | 13479955 | 4 | 4 | 4 | 4 | 4 | 4 | 2 | 2 | 1 | 1 | 1 | 1 | 4    | 0    | 0     | 0     | 0     | 0     | 0     | 0     |
| chrY | 13479956 | 13519955 | 4 | 4 | 3 | 3 | 4 | 4 | 2 | 2 | 0 | 0 | 1 | 1 | 3.67 | 0.52 | 0.65  | 0.65  | -1.29 | -1.29 | 0.65  | 0.65  |
| chrY | 13519956 | 13529955 | 4 | 4 | 3 | 3 | 4 | 4 | 2 | 2 | 0 | 0 | 1 | 1 | 3.67 | 0.52 | 0.65  | 0.65  | -1.29 | -1.29 | 0.65  | 0.65  |
| chrY | 13529956 | 13870150 | 4 | 3 | 3 | 3 | 3 | 3 | 2 | 1 | 0 | 0 | 1 | 1 | 3.17 | 0.41 | 2.04  | -0.41 | -0.41 | -0.41 | -0.41 | -0.41 |
| chrY | 13870151 | 13880150 | 4 | 3 | 3 | 3 | 3 | 3 | 2 | 1 | 0 | 0 | 1 | 1 | 3.17 | 0.41 | 2.04  | -0.41 | -0.41 | -0.41 | -0.41 | -0.41 |
| chrY | 13880151 | 13890150 | 4 | 2 | 3 | 2 | 2 | 2 | 2 | 1 | 0 | 1 | 1 | 1 | 2.5  | 0.84 | 1.79  | -0.6  | 0.6   | -0.6  | -0.6  | -0.6  |
| chrY | 13890151 | 13900150 | 4 | 2 | 3 | 2 | 2 | 2 | 2 | 1 | 0 | 1 | 1 | 1 | 2.5  | 0.84 | 1.79  | -0.6  | 0.6   | -0.6  | -0.6  | -0.6  |
| chrY | 13900151 | 18590150 | 4 | 2 | 2 | 2 | 2 | 2 | 2 | 1 | 1 | 1 | 1 | 1 | 2.33 | 0.82 | 2.04  | -0.41 | -0.41 | -0.41 | -0.41 | -0.41 |
| chrY | 18590151 | 18600150 | 4 | 2 | 2 | 2 | 2 | 2 | 2 | 1 | 1 | 1 | 1 | 1 | 2.33 | 0.82 | 2.04  | -0.41 | -0.41 | -0.41 | -0.41 | -0.41 |
| chrY | 18600151 | 22107950 | 2 | 6 | 6 | 6 | 6 | 6 | 0 | 2 | 1 | 2 | 2 | 2 | 5.33 | 1.63 | -2.04 | 0.41  | 0.41  | 0.41  | 0.41  | 0.41  |
| chrY | 22107951 | 22187550 | 2 | 6 | 6 | 6 | 6 | 6 | 1 | 2 | 1 | 2 | 2 | 2 | 5.33 | 1.63 | -2.04 | 0.41  | 0.41  | 0.41  | 0.41  | 0.41  |
| chrY | 22187551 | 22197550 | 2 | 6 | 4 | 6 | 6 | 6 | 1 | 2 | 1 | 2 | 2 | 2 | 5    | 1.67 | -1.79 | 0.6   | -0.6  | 0.6   | 0.6   | 0.6   |
| chrY | 22197551 | 22227550 | 2 | 6 | 4 | 6 | 5 | 6 | 1 | 2 | 1 | 2 | 2 | 2 | 4.83 | 1.6  | -1.77 | 0.73  | -0.52 | 0.73  | 0.1   | 0.73  |
| chrY | 22227551 | 22488145 | 2 | 5 | 4 | 5 | 5 | 5 | 1 | 2 | 1 | 1 | 2 | 2 | 4.33 | 1.21 | -1.93 | 0.55  | -0.28 | 0.55  | 0.55  | 0.55  |
| chrY | 22488146 | 22498145 | 2 | 5 | 4 | 5 | 5 | 5 | 1 | 2 | 1 | 1 | 2 | 2 | 4.33 | 1.21 | -1.93 | 0.55  | -0.28 | 0.55  | 0.55  | 0.55  |
| chrY | 22498146 | 22508545 | 2 | 5 | 6 | 5 | 5 | 5 | 1 | 2 | 1 | 1 | 2 | 2 | 4.67 | 1.37 | -1.95 | 0.24  | 0.98  | 0.24  | 0.24  | 0.24  |
| chrY | 22508546 | 22518545 | 2 | 6 | 6 | 5 | 5 | 5 | 1 | 2 | 1 | 1 | 2 | 2 | 4.83 | 1.47 | -1.92 | 0.79  | 0.79  | 0.11  | 0.11  | 0.11  |
| chrY | 22518546 | 22599345 | 2 | 6 | 6 | 6 | 6 | 6 | 1 | 2 | 1 | 2 | 2 | 2 | 5.33 | 1.63 | -2.04 | 0.41  | 0.41  | 0.41  | 0.41  | 0.41  |
| chrY | 22599346 | 22609345 | 2 | 6 | 6 | 6 | 6 | 6 | 1 | 2 | 1 | 2 | 2 | 2 | 5.33 | 1.63 | -2.04 | 0.41  | 0.41  | 0.41  | 0.41  | 0.41  |
| chrY | 22609346 | 58908935 | 2 | 6 | 6 | 6 | 6 | 6 | 1 | 2 | 1 | 2 | 2 | 2 | 5.33 | 1.63 | -2.04 | 0.41  | 0.41  | 0.41  | 0.41  | 0.41  |
| chrY | 58908936 | 58969130 | 2 | 6 | 6 | 6 | 6 | 6 | 1 | 2 | 1 | 2 | 2 | 2 | 5.33 | 1.63 | -2.04 | 0.41  | 0.41  | 0.41  | 0.41  | 0.41  |
| chrY | 58969131 | 58979130 | 4 | 5 | 6 | 5 | 5 | 6 | 2 | 2 | 1 | 1 | 1 | 2 | 5.17 | 0.75 | -1.55 | -0.22 | 1.11  | -0.22 | -0.22 | 1.11  |
| chrY | 58979131 | 59029930 | 4 | 5 | 6 | 5 | 5 | 5 | 2 | 2 | 1 | 1 | 1 | 2 | 5    | 0.63 | -1.58 | 0     | 1.58  | 0     | 0     | 0     |
| chrY | 59029931 | 59039930 | 4 | 5 | 6 | 5 | 5 | 5 | 2 | 2 | 1 | 1 | 1 | 2 | 5    | 0.63 | -1.58 | 0     | 1.58  | 0     | 0     | 0     |
| chrY | 59039931 | 59348730 | 2 | 5 | 6 | 5 | 5 | 5 | 1 | 2 | 1 | 1 | 1 | 2 | 4.67 | 1.37 | -1.95 | 0.24  | 0.98  | 0.24  | 0.24  | 0.24  |

**Table S7.** Somatic structure variations of six tumor specimens.

1. The result is from Meerkat.

2. The gene annotation is from wANNOVAR.

| NO. | upstream (5') |            |        | downstream (3') |           |        | SharingOfSixTissue |    |    |    | sv type |      | sv  | breakpoint of upstream (5') |             |               |                        |             |              |               |               |                        |             | breakpoint of downstream (3') |               |          |      |             |             |           |          |  |  |
|-----|---------------|------------|--------|-----------------|-----------|--------|--------------------|----|----|----|---------|------|-----|-----------------------------|-------------|---------------|------------------------|-------------|--------------|---------------|---------------|------------------------|-------------|-------------------------------|---------------|----------|------|-------------|-------------|-----------|----------|--|--|
|     | segment       | bkpos      | strand | segment         | bkpos     | strand | T1                 | T2 | T3 | T4 | HVTT    | PVTT |     | type                        | stream      | mechanism     | Func                   | gene_symbol | gene_strand  | gene_type     | distance      | Func                   | gene_symbol | gene_strand                   | gene_type     | distance | Func | gene_symbol | gene_strand | gene_type | distance |  |  |
| 1   | chr1          | 756268     | +      | chr1            | 758749    | +      | N                  | N  | N  | Y  | N       | N    | del | na                          | alt-EJ      | intergenic    | FAM87B.LINC00115       | +           | lincRNA,linc | 1054;5318     | intergenic    | FAM87B.LINC00115       | +           | lincRNA,linc                  | 3535;2837     |          |      |             |             |           |          |  |  |
| 2   | chr1          | 869885     | +      | chr1            | 870348    | +      | N                  | N  | N  | Y  | N       | N    | del | na                          | alt-EJ      | intronic      | SAMD11                 | +           | protein_cod  | 0             | intronic      | SAMD11                 | +           | protein_cod                   | 0             |          |      |             |             |           |          |  |  |
| 3   | chr1          | 1142719    | +      | chr1            | 1143141   | +      | Y                  | Y  | Y  | N  | Y       | Y    | del | na                          | NHEJ        | upstream      | TNFRSF18               | -           | protein_cod  | 0             | intergenic    | TNFRSF18,TNFRSF4       | -           | protein_cod                   | 1070;3565     |          |      |             |             |           |          |  |  |
| 4   | chr1          | 1232663    | +      | chr1            | 1233036   | +      | N                  | N  | Y  | N  | N       | N    | del | na                          | alt-EJ      | intronic      | ACAP3                  | -           | protein_cod  | 0             | intronic      | ACAP3                  | -           | protein_cod                   | 0             |          |      |             |             |           |          |  |  |
| 5   | chr1          | 2585567    | +      | chr1            | 2620930   | +      | N                  | N  | N  | Y  | N       | N    | del | na                          | alt-EJ      | intronic      | TTC34                  | -           | protein_cod  | 0             | intronic      | TTC34                  | -           | protein_cod                   | 0             |          |      |             |             |           |          |  |  |
| 6   | chr1          | 2617080    | +      | chr1            | 2623571   | +      | N                  | N  | N  | Y  | N       | N    | del | na                          | alt-EJ      | intronic      | TTC34                  | -           | protein_cod  | 0             | intronic      | TTC34                  | -           | protein_cod                   | 0             |          |      |             |             |           |          |  |  |
| 7   | chr1          | 2618918    | +      | chr1            | 2626177   | +      | Y                  | N  | N  | N  | N       | N    | del | na                          | alt-EJ      | intronic      | TTC34                  | -           | protein_cod  | 0             | intronic      | TTC34                  | -           | protein_cod                   | 0             |          |      |             |             |           |          |  |  |
| 8   | chr1          | 2621300    | +      | chr1            | 2628882   | +      | N                  | N  | N  | Y  | N       | N    | del | na                          | alt-EJ      | intronic      | TTC34                  | -           | protein_cod  | 0             | intronic      | TTC34                  | -           | protein_cod                   | 0             |          |      |             |             |           |          |  |  |
| 9   | chr1          | 7570071    | +      | chr1            | 7571527   | +      | Y                  | N  | N  | N  | N       | N    | del | na                          | alt-EJ      | intronic;intr | CAMTA1                 | +           | protein_cod  | 0             | intronic;intr | CAMTA1                 | +           | protein_cod                   | 0             |          |      |             |             |           |          |  |  |
| 10  | chr1          | 14437073   | +      | chr1            | 14438941  | +      | Y                  | N  | N  | N  | N       | N    | del | na                          | alt-EJ      | intergenic    | PRDM2.RNU6-1265P       | +           | protein_cod  | 285499;13665  | intergenic    | PRDM2.RNU6-1265P       | +           | protein_cod                   | 287367;11787  |          |      |             |             |           |          |  |  |
| 11  | chr1          | 16376519   | +      | chr1            | 16386257  | +      | N                  | N  | Y  | N  | N       | N    | del | na                          | alt-EJ      | intronic      | CLCNKB                 | +           | protein_cod  | 0             | intronic      | FAM131C                | -           | protein_cod                   | 0             |          |      |             |             |           |          |  |  |
| 12  | chr1          | 17009563   | +      | chr1            | 17012755  | +      | N                  | Y  | Y  | N  | N       | N    | del | na                          | alt-EJ      | intergenic    | AL021920.1,EIF1AXP1    | +           | miRNA,pse    | 1740;2553     | upstream      | EIF1AXP1               | +           | pseudogene                    | 0             |          |      |             |             |           |          |  |  |
| 13  | chr1          | 17676167   | +      | chr1            | 17677661  | +      | Y                  | N  | Y  | Y  | N       | N    | del | na                          | alt-EJ      | intronic      | PADI4                  | +           | protein_cod  | 0             | intronic      | PADI4                  | +           | protein_cod                   | 0             |          |      |             |             |           |          |  |  |
| 14  | chr1          | 17676184   | +      | chr1            | 17677519  | +      | N                  | N  | N  | N  | N       | Y    | del | na                          | NHEJ        | intronic      | PADI4                  | +           | protein_cod  | 0             | intronic      | PADI4                  | +           | protein_cod                   | 0             |          |      |             |             |           |          |  |  |
| 15  | chr1          | 20497191   | +      | chr1            | 20497740  | +      | Y                  | Y  | Y  | Y  | Y       | Y    | del | na                          | alt-EJ      | intronic      | PLA2G2C                | +           | protein_cod  | 0             | intronic      | PLA2G2C                | -           | protein_cod                   | 0             |          |      |             |             |           |          |  |  |
| 16  | chr1          | 21786419   | +      | chr1            | 21786692  | +      | N                  | N  | Y  | N  | N       | N    | del | na                          | alt-EJ      | ncRNA_exo     | PNF1P10                | -           | pseudogene   | 0             | intronic      | NBPF3                  | +           | protein_cod                   | 0             |          |      |             |             |           |          |  |  |
| 17  | chr1          | 24994644   | +      | chr1            | 24997171  | +      | Y                  | N  | N  | N  | N       | N    | del | na                          | alt-EJ      | intronic;intr | SRRM1                  | +           | protein_cod  | 0             | intronic;intr | SRRM1                  | +           | protein_cod                   | 0             |          |      |             |             |           |          |  |  |
| 18  | chr1          | 37423392   | +      | chr1            | 37423505  | +      | N                  | N  | N  | N  | N       | Y    | del | na                          | alt-EJ      | intronic      | GRIK3                  | +           | protein_cod  | 0             | intronic      | GRIK3                  | -           | protein_cod                   | 0             |          |      |             |             |           |          |  |  |
| 19  | chr1          | 53468857   | +      | chr1            | 53468873  | +      | Y                  | Y  | Y  | Y  | Y       | Y    | del | na                          | NHEJ        | intronic      | SGIP1                  | +           | protein_cod  | 0             | intronic      | SGIP1                  | +           | protein_cod                   | 0             |          |      |             |             |           |          |  |  |
| 20  | chr1          | 60656266   | +      | chr1            | 60656266  | +      | N                  | N  | N  | Y  | N       | N    | del | na                          | alt-EJ      | intergenic    | RP11-575B7.3,RP11-7    | +           | lincRNA,linc | 40915;349655  | intronic      | GN4                    | +           | protein_cod                   | 0             |          |      |             |             |           |          |  |  |
| 21  | chr1          | 62082860   | +      | chr1            | 62083705  | +      | Y                  | Y  | Y  | Y  | Y       | Y    | del | na                          | alt-EJ      | intergenic    | NFIA.AC099791.1        | +           | protein_cod  | 154395;11843  | intergenic    | NFIA.AC099791.1        | +           | protein_cod                   | 155240;10998  |          |      |             |             |           |          |  |  |
| 22  | chr1          | 67123907   | +      | chr1            | 67277113  | +      | Y                  | Y  | Y  | Y  | Y       | Y    | del | na                          | NHEJ        | intronic      | SGIP1                  | +           | protein_cod  | 0             | intergenic    | INSL5.WDR78            | +           | protein_cod                   | 10174;1455    |          |      |             |             |           |          |  |  |
| 23  | chr1          | 68008004   | +      | chr1            | 68008862  | +      | N                  | N  | N  | N  | N       | Y    | del | na                          | alt-EJ      | intergenic    | RNU6-1031P,RP11-393N   | +           | snRNA,pse    | 1088;18752    | intergenic    | RNU6-1031P,RP11-393N   | +           | snRNA,pse                     | 1946;17894    |          |      |             |             |           |          |  |  |
| 24  | chr1          | 72766323   | +      | chr1            | 72811840  | +      | Y                  | Y  | Y  | Y  | Y       | N    | del | na                          | NHEJ        | upstream      | RPL31P12               | +           | pseudogene   | 0             | intergenic    | RPL31P12,RNU6-1246P    | +           | pseudogene                    | 44328;371506  |          |      |             |             |           |          |  |  |
| 25  | chr1          | 86400851   | +      | chr1            | 86404539  | +      | N                  | N  | Y  | Y  | N       | N    | del | na                          | NHEJ        | intronic;intr | COL24A1                | -           | protein_cod  | 0             | intronic;intr | COL24A1                | -           | protein_cod                   | 0             |          |      |             |             |           |          |  |  |
| 26  | chr1          | 87081599   | +      | chr1            | 87101802  | +      | Y                  | Y  | Y  | Y  | Y       | Y    | del | na                          | alt-EJ      | ncRNA_intr    | RP4-651E10.4           | -           | antisense    | 0             | ncRNA_intr    | CLCA3P,RP4-651E10.4    | +           | pseudogene                    | 0             |          |      |             |             |           |          |  |  |
| 27  | chr1          | 94288373   | +      | chr1            | 94291258  | +      | Y                  | Y  | Y  | Y  | Y       | Y    | del | na                          | alt-EJ      | intronic      | BCAR3                  | -           | protein_cod  | 0             | intronic      | BCAR3                  | -           | protein_cod                   | 0             |          |      |             |             |           |          |  |  |
| 28  | chr1          | 103124309  | +      | chr1            | 103124729 | +      | N                  | N  | N  | N  | Y       | N    | del | na                          | alt-EJ      | intergenic    | RP11-202K23.1,RP5-9    | -           | lincRNA,linc | 269123;104569 | intergenic    | RP11-202K23.1,RP5-936  | -           | lincRNA,linc                  | 269543;104149 |          |      |             |             |           |          |  |  |
| 29  | chr1          | 113799629  | +      | chr1            | 113800052 | +      | N                  | N  | Y  | N  | N       | Y    | del | na                          | alt-EJ      | intergenic    | RP11-389Q22.5,MAGI3    | +           | protein_cod  | 57749;133742  | intergenic    | RP11-389Q22.5,MAGI3    | +           | protein_cod                   | 58212;133279  |          |      |             |             |           |          |  |  |
| 30  | chr1          | 142535592  | +      | chr1            | 142537369 | +      | N                  | N  | N  | N  | N       | Y    | del | na                          | alt-EJ      | intergenic    | NONE.RP11-417J8.1      | NONE,+      | NONE,lincR   | NONE;17701    | intergenic    | NONE.RP11-417J8.1      | NONE,+      | NONE,lincR                    | NONE;15924    |          |      |             |             |           |          |  |  |
| 31  | chr1          | 142535917  | +      | chr1            | 142537362 | +      | N                  | N  | Y  | Y  | N       | N    | del | na                          | alt-EJ      | intergenic    | NONE.RP11-417J8.1      | NONE,+      | NONE,lincR   | NONE;17376    | intergenic    | NONE.RP11-417J8.1      | NONE,+      | NONE,lincR                    | NONE;15931    |          |      |             |             |           |          |  |  |
| 32  | chr1          | 142536075  | +      | chr1            | 142536899 | +      | N                  | N  | N  | N  | Y       | N    | del | na                          | alt-EJ      | intergenic    | NONE.RP11-417J8.1      | NONE,+      | NONE,lincR   | NONE;17218    | intergenic    | NONE.RP11-417J8.1      | NONE,+      | NONE,lincR                    | NONE;16394    |          |      |             |             |           |          |  |  |
| 33  | chr1          | 144901180  | +      | chr1            | 14490610  | +      | Y                  | Y  | Y  | Y  | Y       | Y    | del | na                          | NHEJ        | UTR3          | PDE4DIP                | -           | protein_cod  | 0             | intronic      | PDE4DIP                | -           | protein_cod                   | 0             |          |      |             |             |           |          |  |  |
| 34  | chr1          | 145092947  | +      | chr1            | 145097083 | +      | Y                  | Y  | Y  | Y  | Y       | Y    | del | na                          | alt-EJ      | intergenic    | RP4-725K1.1,SEC22B     | +           | pseudogene   | 4380;3273     | ncRNA_intr    | SEC22B                 | +           | processed_                    | 0             |          |      |             |             |           |          |  |  |
| 35  | chr1          | 158667531  | +      | chr1            | 158689983 | +      | Y                  | Y  | Y  | Y  | Y       | Y    | del | na                          | alt-EJ      | intergenic    | RP11-393K10.1,PYHIN1   | +           | pseudogene   | 14241;33055   | intergenic    | RP11-393K10.1,PYHIN1   | +           | pseudogene                    | 16693;30603   |          |      |             |             |           |          |  |  |
| 36  | chr1          | 159648707  | +      | chr1            | 159649658 | +      | Y                  | Y  | Y  | Y  | Y       | Y    | del | na                          | NHEJ        | intergenic    | OR10J6P,CRPP1          | +           | pseudogene   | 79690;26066   | intergenic    | OR10J6P,CRPP1          | +           | pseudogene                    | 80641;25115   |          |      |             |             |           |          |  |  |
| 37  | chr1          | 162230748  | +      | chr1            | 162231278 | +      | N                  | Y  | N  | Y  | Y       | Y    | del | na                          | NHEJ        | intronic      | NOS1AP                 | +           | protein_cod  | 0             | intronic      | NOS1AP                 | +           | protein_cod                   | 0             |          |      |             |             |           |          |  |  |
| 38  | chr1          | 165731227  | +      | chr1            | 165731508 | +      | Y                  | Y  | Y  | N  | Y       | Y    | del | na                          | alt-EJ      | intronic      | TMC01                  | +           | protein_cod  | 0             | intronic      | TMC01                  | -           | protein_cod                   | 0             |          |      |             |             |           |          |  |  |
| 39  | chr1          | 168427011  | +      | chr1            | 168428843 | +      | Y                  | Y  | Y  | Y  | Y       | Y    | del | na                          | alt-EJ      | intergenic    | QRSL1P1,RP5-968D2      | -           | pseudogene   | 6562;6441     | intergenic    | QRSL1P1,RP5-968D2.1    | -           | pseudogene                    | 8394;4609     |          |      |             |             |           |          |  |  |
| 40  | chr1          | 174796558  | +      | chr1            | 174801847 | +      | Y                  | Y  | Y  | Y  | Y       | Y    | del | na                          | alt-EJ      | intronic      | RABGAP1L               | +           | protein_cod  | 0             | intronic      | RABGAP1L               | +           | protein_cod                   | 0             |          |      |             |             |           |          |  |  |
| 41  | chr1          | 1856330047 | +      | chr1            | 185632327 | +      | Y                  | Y  | Y  | Y  | Y       | Y    | del | na                          | alt-EJ      | intergenic    | GS1-204I12.4,HMCN1     | +           | lincRNA,pro  | 3747;73636    | intergenic    | GS1-204I12.4,HMCN1     | +           | lincRNA,pro                   | 6027;71356    |          |      |             |             |           |          |  |  |
| 42  | chr1          | 188539455  | +      | chr1            | 188540231 | +      | Y                  | Y  | Y  | Y  | Y       | Y    | del | na                          | alt-EJ      | intergenic    | RP11-669M2.1,RP11-665  | +           | lincRNA,pse  | 33859;101029  | intergenic    | RP11-669M2.1,RP11-665  | +           | lincRNA,pse                   | 34635;10025   |          |      |             |             |           |          |  |  |
| 43  | chr1          | 194450987  | +      | chr1            | 194454313 | +      | N                  | N  | N  | Y  | N       | N    | del | na                          | alt-EJ      | intergenic    | RP11-476H20.1,RNU6     | +           | lincRNA,snf  | 129431;6246   | intergenic;ir | RP11-476H20.1,RNU6-9i  | +           | lincRNA,snf                   | 132757;2920   |          |      |             |             |           |          |  |  |
| 44  | chr1          | 194451058  | +      | chr1            | 194454313 | +      | N                  | Y  | Y  | N  | N       | Y    | del | na                          | NHEJ        | intergenic    | RP11-476H20.1,RNU6     | +           | lincRNA,snf  | 129502;6175   | intergenic;ir | RP11-476H20.1,RNU6-9i  | +           | lincRNA,snf                   | 132757;2920   |          |      |             |             |           |          |  |  |
| 45  | chr1          | 194451099  | +      | chr1            | 194454313 | +      | N                  | N  | N  | Y  | N       | N    | del | na                          | alt-EJ      | intergenic    | RP11-476H20.1,RNU6     | +           | lincRNA,snf  | 129543;6134   | intergenic;ir | RP11-476H20.1,RNU6-9i  | +           | lincRNA,snf                   | 132757;2920   |          |      |             |             |           |          |  |  |
| 46  | chr1          | 194517609  | +      | chr1            | 194517868 | +      | N                  | N  | N  | N  | Y       | N    | del | na                          | NHEJ        | intergenic    | RNU6-983P,RP11-489C1   | +           | snRNA,pse    | 60274;170316  | intergenic    | RNU6-983P,RP11-489C1   | +           | snRNA,pse                     | 60533;170057  |          |      |             |             |           |          |  |  |
| 47  | chr1          | 198773749  | +      | chr1            | 198775415 | +      | Y                  | Y  | Y  | Y  | Y       | Y    | del | na                          | NHEJ        | intergenic    | PTPRC,MIR181A1HG       | +           | protein_cod  | 47204;2873    | intergenic    | PTPRC,MIR181A1HG       | +           | protein_cod                   | 48870;1207    |          |      |             |             |           |          |  |  |
| 48  | chr1          | 206814684  | +      | chr1            | 206815662 | +      | Y                  | Y  | Y  | Y  | Y       | Y    | del | na                          | alt-EJ      | intronic      | DYRK3                  | +           | protein_cod  | 0             | intronic      | DYRK3                  | +           | protein_cod                   | 0             |          |      |             |             |           |          |  |  |
| 49  | chr1          | 209627163  | +      | chr1            | 213087099 | +      | N                  | N  | Y  | N  | N       | N    | del | na                          | alt-EJ      | intergenic    | M20SHG,RP1-272L1       | +           | lincRNA,linc | 20980;74637   | intergenic    | FLVCR1,VASH2           | +           | protein_cod                   | 15204;35953   |          |      |             |             |           |          |  |  |
| 50  | chr1          | 213083569  | +      | chr1            | 213087762 | +      | N                  | N  | N  | N  | N       | Y    | del | na                          | TEI_complex | intergenic    | FLVCR1,VASH2           | +           | protein_cod  | 10864;40293   | intergenic    | FLVCR1,VASH2           | +           | protein_cod                   | 15057;36100   |          |      |             |             |           |          |  |  |
| 51  | chr1          | 213714501  | +      | chr1            | 225312465 | +      | N                  | N  | Y  | N  | N       | N    | del | na                          | alt-EJ      | ncRNA_intr    | RP11-554K11.2          | +           | lincRNA      | 0             | intronic      | DNAH14                 | +           | protein_cod                   | 0             |          |      |             |             |           |          |  |  |
| 52  | chr1          | 220502944  | +      | chr1            | 220503584 | +      | Y                  | Y  | Y  | Y  | Y       | Y    | del | na                          | alt-EJ      | intergenic    | RP11-302I18.1,RP11-302 | -           | pseudogene   | 12003;30129   | intergenic    | RP11-302I18.1,RP11-302 | -           | pseudogene                    | 12643;29489   |          |      |             |             |           |          |  |  |
| 53  | chr1          | 224247109  | +      | chr1            | 224247586 | +      | Y                  | Y  | Y  | Y  | Y       | Y    | del | na                          | alt-EJ      | intergenic    | RP11-504P24.5,RN7SKF   | -           | pseudogene   | 24351;47875   | intergenic    | RP11-504P24.5,RN7SKF   | -           | pseudogene                    | 24828;47398   |          |      |             |             |           |          |  |  |
| 54  | chr1          | 226002815  | +      | chr1            | 226003143 | +      | Y                  | Y  | Y  | Y  | Y       | Y    | del | na                          | alt-EJ      | intronic      | EPHX1                  | +           | protein_cod  | 0             | intronic      | EPHX1                  | +           | protein_cod                   | 0             |          |      |             |             |           |          |  |  |
| 55  | chr1          | 229373388  | +      | chr1            | 229373763 | +      | N                  | N  | N  | N  | N       | Y    | del | na                          | NHEJ        | intergenic    | RP5-106I1H20.5,TMEM71  | +           | antisense,p  | 10079;11995   | intergenic    | RP5-106I1H20.5,TMEM71  | +           | antisense,p                   | 10454;11620   |          |      |             |             |           |          |  |  |
| 56  | chr1          | 229812535  | +      | chr1            | 229820839 | +      | Y                  | Y  | Y  | Y  | Y       | Y    | del | na                          | alt-EJ      | intergenic    | URB2,RP11-108F13.2     | +           | protein_cod  | 16589;12211   | intergenic    | URB2,RP11-108F13.2     | +           | protein_cod                   | 24893;3907    |          |      |             |             |           |          |  |  |
| 57  | chr1          | 233962210  | +      | chr1            | 233963554 | +      | N                  | N  | Y  | Y  | Y       | Y    | del | na                          | alt-EJ      | intergenic    | KCNK1,RP11-30          |             |              |               |               |                        |             |                               |               |          |      |             |             |           |          |  |  |

|     |       |           |   |       |           |   |   |   |   |   |   |     |    |        |                  |                       |     |              |               |                  |                       |     |              |               |
|-----|-------|-----------|---|-------|-----------|---|---|---|---|---|---|-----|----|--------|------------------|-----------------------|-----|--------------|---------------|------------------|-----------------------|-----|--------------|---------------|
| 79  | chr10 | 91998538  | + | chr10 | 92002031  | + | Y | Y | Y | Y | Y | del | na | alt-EJ | intergenic       | RN7SKP143,RP11-151    | -,- | misc_RNA,l   | 74821;163740  | intergenic       | RN7SKP143,RP11-15K3   | -,- | misc_RNA,l   | 78314;160247  |
| 80  | chr10 | 93633336  | + | chr10 | 93634564  | + | Y | Y | Y | N | Y | del | na | alt-EJ | intergenic       | TNKS2.FGFBP3          | +,+ | protein_cod  | 8303;33010    | intergenic       | TNKS2.FGFBP3          | +,+ | protein_cod  | 9531;31782    |
| 81  | chr10 | 100496980 | + | chr10 | 100497289 | + | N | Y | N | Y | Y | del | na | alt-EJ | intronic         | HPSE2                 | -   | protein_cod  | 0             | intronic         | HPSE2                 | -   | protein_cod  | 0             |
| 82  | chr10 | 107253000 | + | chr10 | 107253354 | + | Y | Y | Y | Y | Y | del | na | alt-EJ | intergenic       | SORCS3,RNU6-463P      | +,+ | protein_cod  | 228007;41417  | intergenic       | SORCS3,RNU6-463P      | +,+ | protein_cod  | 228361;41063  |
| 83  | chr10 | 107950683 | + | chr10 | 107951597 | + | Y | Y | Y | Y | Y | del | na | alt-EJ | intergenic       | RP11-298H24.1,RP11-1  | +,+ | lincRNA,pse  | 2203;359181   | intergenic       | RP11-298H24.1,RP11-44 | +,+ | lincRNA,pse  | 3117;358267   |
| 84  | chr10 | 108030319 | + | chr10 | 108032544 | + | Y | N | Y | Y | Y | del | na | alt-EJ | intergenic       | RP11-298H24.1,RP11-1  | +,+ | lincRNA,pse  | 81839;279545  | intergenic       | RP11-298H24.1,RP11-44 | +,+ | lincRNA,pse  | 84064;277320  |
| 85  | chr10 | 114112182 | + | chr10 | 114116660 | + | Y | Y | Y | Y | Y | del | na | alt-EJ | ncRNA_intrn      | GUCY2GP               | -   | pseudogene   | 0             | upstream         | GUCY2GP               | -   | pseudogene   | 0             |
| 86  | chr10 | 117711616 | + | chr10 | 117712003 | + | Y | Y | Y | Y | N | del | na | NHEJ   | intergenic       | ATRN1L1,GFRA1         | +,+ | protein_cod  | 3113;104828   | intergenic       | ATRN1L1,GFRA1         | +,+ | protein_cod  | 3500;104441   |
| 87  | chr10 | 127191656 | + | chr10 | 127197236 | + | Y | Y | Y | N | Y | del | na | alt-EJ | intergenic       | RPS27P18,TEX36-AS     | +,+ | pseudogene   | 29155;71284   | intergenic       | RPS27P18,TEX36-AS1    | +,+ | pseudogene   | 34735;65704   |
| 88  | chr10 | 128582125 | + | chr10 | 128770974 | + | N | N | Y | N | N | del | na | alt-EJ | intergenic       | SNORD60,DOCK1         | +,+ | snoRNA,prc   | 113782;11853  | intronic         | DOCK1                 | +   | protein_cod  | 0             |
| 89  | chr10 | 131595178 | + | chr10 | 131595475 | + | Y | N | Y | N | Y | del | na | alt-EJ | intergenic       | RP11-109A6.3,EBF3     | +,+ | lincRNA,prc  | 27479;38369   | intergenic       | RP11-109A6.3,EBF3     | +,+ | lincRNA,prc  | 27776;38072   |
| 90  | chr10 | 134831025 | + | chr10 | 134831245 | + | Y | N | Y | N | Y | del | na | alt-EJ | intergenic       | LINC01168,GPR123      | +,+ | lincRNA,prc  | 41167;53408   | intergenic       | LINC01168,GPR123      | +,+ | lincRNA,prc  | 41387;53188   |
| 91  | chr10 | 134831028 | + | chr10 | 134831667 | + | N | Y | N | N | N | del | na | alt-EJ | intergenic       | LINC01168,GPR123      | +,+ | lincRNA,prc  | 41170;53405   | intergenic       | LINC01168,GPR123      | +,+ | lincRNA,prc  | 41809;52766   |
| 92  | chr10 | 135104756 | + | chr10 | 135105968 | + | Y | Y | Y | Y | Y | del | na | alt-EJ | intronic         | TUBGCP2               | -   | protein_cod  | 0             | intronic         | TUBGCP2               | -   | protein_cod  | 0             |
| 93  | chr11 | 1016980   | + | chr11 | 1017598   | + | N | N | N | Y | N | del | na | alt-EJ | exonic           | MUC6                  | -   | protein_cod  | 0             | exonic           | MUC6                  | -   | protein_cod  | 0             |
| 94  | chr11 | 2215323   | + | chr11 | 2215578   | + | N | Y | Y | Y | Y | del | na | alt-EJ | intergenic       | MIR4686,ASCL2         | +,+ | miRNA,prot   | 20955;74402   | intergenic       | MIR4686,ASCL2         | +,+ | miRNA,prot   | 21210;74147   |
| 95  | chr11 | 3463795   | + | chr11 | 67592760  | + | N | N | Y | N | N | del | na | alt-EJ | intergenic       | FAM86GP,RP13-726E1    | +,+ | pseudogene   | 20069;26754   | intergenic       | FAM86C2P,RP11-119D9.  | +,+ | pseudogene   | 19953;15653   |
| 96  | chr11 | 5521631   | + | chr11 | 5523173   | + | Y | Y | Y | Y | Y | del | na | alt-EJ | ncRNA_intrn      | AC104389.28           | -   | processed_i  | 0             | ncRNA_intrn      | AC104389.28           | -   | processed_i  | 0             |
| 97  | chr11 | 5784574   | + | chr11 | 5809284   | + | Y | Y | Y | Y | Y | del | na | alt-EJ | intronic         | TRIM5                 | -   | protein_cod  | 0             | exonic           | OR52N1                | -   | protein_cod  | 0             |
| 98  | chr11 | 9644770   | + | chr11 | 10154921  | + | Y | N | N | N | N | del | na | alt-EJ | intergenic;intrn | RP11-16F15.1,RP11-1   | +,+ | pseudogene   | 16614;7785    | intronic;intrn   | SBF2                  | -   | protein_cod  | 0             |
| 99  | chr11 | 10292737  | + | chr11 | 10293844  | + | Y | Y | Y | Y | Y | del | na | alt-EJ | intronic         | SBF2                  | -   | protein_cod  | 0             | intronic         | SBF2                  | -   | protein_cod  | 0             |
| 100 | chr11 | 11822987  | + | chr11 | 11824624  | + | Y | Y | Y | Y | Y | del | na | NHEJ   | intergenic       | RP11-756D7.1,USP47    | +,+ | pseudogene   | 42007;39983   | intergenic       | RP11-756D7.1,USP47    | +,+ | pseudogene   | 43644;38346   |
| 101 | chr11 | 15529789  | + | chr11 | 15536549  | + | Y | Y | Y | Y | Y | del | na | alt-EJ | intergenic       | snoMBII-202,RP11-53'  | +,+ | snoRNA,lin   | 26350;44612   | intergenic       | snoMBII-202,RP11-531H | +,+ | snoRNA,lin   | 33110;37852   |
| 102 | chr11 | 16996173  | + | chr11 | 16996598  | + | Y | Y | Y | Y | Y | del | na | alt-EJ | intronic         | PLEKHA7               | -   | protein_cod  | 0             | intronic         | PLEKHA7               | -   | protein_cod  | 0             |
| 103 | chr11 | 29967578  | + | chr11 | 29968467  | + | Y | Y | N | Y | Y | del | na | NHEJ   | intergenic       | CTD-3138F19.1,RP11-1  | +,+ | lincRNA,lin  | 64317;34082   | intergenic       | CTD-3138F19.1,RP11-21 | +,+ | lincRNA,lin  | 65206;33193   |
| 104 | chr11 | 31393774  | + | chr11 | 31397648  | + | N | Y | N | Y | N | del | na | alt-EJ | intronic         | DNAJC24               | +   | protein_cod  | 0             | intronic         | DNAJC24               | +   | protein_cod  | 0             |
| 105 | chr11 | 39795370  | + | chr11 | 39796866  | + | N | N | Y | N | N | del | na | NHEJ   | intergenic;intrn | AC027806.1,AC02174    | +,+ | miRNA,miR    | 42917;87686   | intergenic;intrn | AC027806.1,AC021749.1 | +,+ | miRNA,miR    | 44413;86190   |
| 106 | chr11 | 40699730  | + | chr11 | 40700469  | + | Y | Y | Y | N | Y | del | na | alt-EJ | intronic         | LRRC4C                | -   | protein_cod  | 0             | intronic         | LRRC4C                | -   | protein_cod  | 0             |
| 107 | chr11 | 47660603  | + | chr11 | 47663931  | + | N | N | N | Y | N | del | na | alt-EJ | exonic           | MTCH2                 | -   | protein_cod  | 0             | exonic           | MTCH2                 | -   | protein_cod  | 0             |
| 108 | chr11 | 48600857  | + | chr11 | 48604284  | + | Y | Y | Y | Y | Y | del | na | alt-EJ | upstream         | OR4A45P               | +   | pseudogene   | 0             | intergenic       | OR4A45P,OR4A41P       | +,+ | pseudogene   | 2396;7028     |
| 109 | chr11 | 58166990  | + | chr11 | 58168159  | + | Y | Y | Y | Y | Y | del | na | alt-EJ | intergenic       | OR5B15P,OR5B3         | +,+ | pseudogene   | 11031;2947    | intergenic       | OR5B15P,OR5B3         | +,+ | pseudogene   | 12200;1778    |
| 110 | chr11 | 58631773  | + | chr11 | 58636555  | + | Y | Y | Y | Y | Y | del | na | alt-EJ | intergenic       | GLYATL2,GLYATL1P2     | +,+ | protein_cod  | 19516;14002   | intergenic       | GLYATL2,GLYATL1P2     | +,+ | protein_cod  | 24298;9220    |
| 111 | chr11 | 60372231  | + | chr11 | 60372359  | + | Y | N | N | N | N | del | na | VNTR   | intergenic       | MS4A13,LINC00301      | +,+ | protein_cod  | 62037;10978   | intergenic       | MS4A13,LINC00301      | +,+ | protein_cod  | 62165;10850   |
| 112 | chr11 | 62512344  | + | chr11 | 62513155  | + | N | N | N | Y | N | del | na | alt-EJ | intergenic       | TTC9C,ZBTB3           | +,+ | protein_cod  | 4588;3447     | intergenic       | TTC9C,ZBTB3           | +,+ | protein_cod  | 5399;2636     |
| 113 | chr11 | 62512527  | + | chr11 | 62513227  | + | N | N | N | Y | N | del | na | alt-EJ | intergenic       | TTC9C,ZBTB3           | +,+ | protein_cod  | 4771;3264     | intergenic       | TTC9C,ZBTB3           | +,+ | protein_cod  | 5471;2564     |
| 114 | chr11 | 68183114  | + | chr11 | 68183425  | + | N | Y | Y | Y | Y | del | na | alt-EJ | intronic         | LRP5                  | +   | protein_cod  | 0             | intronic         | LRP5                  | +   | protein_cod  | 0             |
| 115 | chr11 | 79948611  | + | chr11 | 79949691  | + | N | Y | Y | Y | Y | del | na | NHEJ   | intergenic       | RP11-885L14.1,CTD-2   | +,+ | pseudogene   | 247938;84053  | intergenic       | RP11-885L14.1,CTD-255 | +,+ | pseudogene   | 249018;82973  |
| 116 | chr11 | 83143381  | + | chr11 | 83143662  | + | N | Y | Y | Y | N | del | na | alt-EJ | intergenic       | RP11-727A23.10,DLG2   | +,+ | antisense,pr | 8622;22674    | intergenic       | RP11-727A23.10,DLG2   | +,+ | antisense,pr | 9103;22393    |
| 117 | chr11 | 98248206  | + | chr11 | 98248601  | + | Y | Y | Y | Y | Y | del | na | alt-EJ | intergenic       | RP11-684B20.1,CTD-2   | +,+ | pseudogene   | 246280;187598 | intergenic       | RP11-684B20.1,CTD-234 | +,+ | pseudogene   | 246675;187203 |
| 118 | chr11 | 106878596 | + | chr11 | 106878979 | + | N | Y | Y | Y | N | del | na | alt-EJ | intronic         | GUCY1A2               | -   | protein_cod  | 0             | intronic         | GUCY1A2               | -   | protein_cod  | 0             |
| 119 | chr11 | 114424910 | + | chr11 | 114431927 | + | Y | Y | Y | Y | Y | del | na | alt-EJ | UTR5             | NXPE1                 | -   | protein_cod  | 0             | intergenic       | NXPE1,NXPE4           | -   | protein_cod  | 1310;9386     |
| 120 | chr11 | 134605144 | + | chr11 | 134605829 | + | Y | Y | Y | Y | Y | del | na | alt-EJ | upstream         | RP11-469N6.1          | +,+ | lincRNA      | 0             | ncRNA_exo        | RP11-469N6.1          | +,+ | lincRNA      | 0             |
| 121 | chr11 | 134732899 | + | chr11 | 134734114 | + | Y | Y | Y | Y | Y | del | na | alt-EJ | intergenic       | RP11-469N6.1,RP11-5   | +,+ | lincRNA,lin  | 99195;87703   | intergenic       | RP11-469N6.1,RP11-555 | +,+ | lincRNA,lin  | 100410;86488  |
| 122 | chr12 | 1028821   | + | chr12 | 1029628   | + | N | Y | Y | N | N | del | na | alt-EJ | intronic         | RAD52                 | -   | protein_cod  | 0             | intronic         | RAD52                 | -   | protein_cod  | 0             |
| 123 | chr12 | 1029131   | + | chr12 | 1029297   | + | N | N | Y | N | N | del | na | alt-EJ | intronic         | RAD52                 | -   | protein_cod  | 0             | intronic         | RAD52                 | -   | protein_cod  | 0             |
| 124 | chr12 | 1437991   | + | chr12 | 1438612   | + | Y | Y | Y | Y | Y | del | na | alt-EJ | intronic         | ERC1                  | +   | protein_cod  | 0             | intronic         | ERC1                  | +   | protein_cod  | 0             |
| 125 | chr12 | 1864013   | + | chr12 | 1864329   | + | Y | Y | Y | Y | Y | del | na | alt-EJ | intronic         | ADIPOR2               | +   | protein_cod  | 0             | intronic         | ADIPOR2               | +   | protein_cod  | 0             |
| 126 | chr12 | 3591313   | + | chr12 | 3595629   | + | Y | Y | Y | Y | Y | del | na | alt-EJ | intronic         | PRMT8                 | +   | protein_cod  | 0             | intronic         | PRMT8                 | +   | protein_cod  | 0             |
| 127 | chr12 | 8558485   | + | chr12 | 8568227   | + | Y | Y | Y | N | Y | del | na | NHEJ   | downstream       | RP11-113C12.8         | -   | pseudogene   | 0             | ncRNA_exo        | OR7E140P              | -   | pseudogene   | 0             |
| 128 | chr12 | 9557740   | + | chr12 | 9558492   | + | N | N | N | Y | N | del | na | alt-EJ | ncRNA_intrn      | RP11-599J14.2         | -   | pseudogene   | 0             | ncRNA_intrn      | RP11-599J14.2         | -   | pseudogene   | 0             |
| 129 | chr12 | 9557777   | + | chr12 | 9558815   | + | N | N | N | N | Y | del | na | alt-EJ | ncRNA_intrn      | RP11-599J14.2         | -   | pseudogene   | 0             | ncRNA_intrn      | RP11-599J14.2         | -   | pseudogene   | 0             |
| 130 | chr12 | 9558121   | + | chr12 | 9558535   | + | Y | N | N | N | N | del | na | alt-EJ | ncRNA_intrn      | RP11-599J14.2         | -   | pseudogene   | 0             | ncRNA_intrn      | RP11-599J14.2         | -   | pseudogene   | 0             |
| 131 | chr12 | 11166792  | + | chr12 | 11221980  | + | N | N | Y | Y | N | del | na | alt-EJ | intergenic       | TAS2R20,TAS2R19       | +,+ | protein_cod  | 16318;7426    | intergenic       | TAS2R46,TAS2R64P      | +,+ | protein_cod  | 7087;7388     |
| 132 | chr12 | 11166902  | + | chr12 | 11222092  | + | N | N | N | N | Y | del | na | alt-EJ | intergenic       | TAS2R20,TAS2R19       | +,+ | protein_cod  | 16428;7316    | intergenic       | TAS2R46,TAS2R64P      | +,+ | protein_cod  | 7199;7276     |
| 133 | chr12 | 11178538  | + | chr12 | 11205497  | + | Y | N | Y | N | Y | del | na | alt-EJ | intergenic;intrn | TAS2R19,TAS2R31       | +,+ | pseudogene   | 3319;4448     | intergenic;intrn | TAS2R63P,TAS2R46      | +,+ | pseudogene   | 3642;8467     |
| 134 | chr12 | 11341899  | + | chr12 | 11342214  | + | Y | Y | N | Y | Y | del | na | alt-EJ | intergenic       | TAS2R42,RP11-144O2    | +,+ | protein_cod  | 2356;7088     | intergenic       | TAS2R42,RP11-144O23.  | +,+ | protein_cod  | 2671;6773     |
| 135 | chr12 | 12026415  | + | chr12 | 12027154  | + | Y | Y | Y | Y | Y | del | na | NHEJ   | intronic         | ETV6                  | +   | protein_cod  | 0             | intronic         | ETV6                  | +   | protein_cod  | 0             |
| 136 | chr12 | 26937704  | + | chr12 | 26937938  | + | N | N | N | Y | N | del | na | alt-EJ | intronic         | ITPR2                 | +   | protein_cod  | 0             | intronic         | ITPR2                 | +   | protein_cod  | 0             |
| 137 | chr12 | 30371317  | + | chr12 | 30371743  | + | Y | Y | Y | N | Y | del | na | NHEJ   | downstream       | RP11-776A13.1         | +   | lincRNA      | 0             | downstream       | RP11-776A13.1         | +   | lincRNA      | 0             |
| 138 | chr12 | 30508189  | + | chr12 | 30508637  | + | Y | Y | Y | Y | Y | del | na | alt-EJ | intergenic       | RP11-155I9.1,RP11-776 | +,+ | lincRNA,pse  | 33639;99663   | intergenic       | RP11-155I9.1,RP11-776 | +,+ | lincRNA,pse  | 34087;99215   |
|     |       |           |   |       |           |   |   |   |   |   |   |     |    |        |                  |                       |     |              |               |                  |                       |     |              |               |

|     |       |           |   |       |           |   |   |   |   |   |   |     |    |        |            |                        |     |               |               |            |                       |     |               |               |
|-----|-------|-----------|---|-------|-----------|---|---|---|---|---|---|-----|----|--------|------------|------------------------|-----|---------------|---------------|------------|-----------------------|-----|---------------|---------------|
| 163 | chr13 | 20825483  | + | chr13 | 20828795  | + | Y | Y | Y | Y | Y | del | na | alt-EJ | intergenic | GJB6,CRYL1             | -,- | protein_cod   | 18949;152323  | intergenic | GJB6,CRYL1            | -,- | protein_cod   | 22261;149011  |
| 164 | chr13 | 21729289  | + | chr13 | 21729832  | + | Y | Y | Y | Y | Y | del | na | NHEJ   | exonic     | SKA3                   | -   | protein_cod   | 0             | exonic     | SKA3                  | -   | protein_cod   | 0             |
| 165 | chr13 | 21729951  | + | chr13 | 21732062  | + | N | N | N | Y | N | del | na | alt-EJ | splicing   | SKA3                   | -   | protein_cod   | 0             | exonic     | SKA3                  | -   | protein_cod   | 0             |
| 166 | chr13 | 21732263  | + | chr13 | 21734040  | + | N | Y | Y | Y | Y | del | na | alt-EJ | exonic     | SKA3                   | -   | protein_cod   | 0             | splicing   | SKA3                  | -   | protein_cod   | 0             |
| 167 | chr13 | 21736015  | + | chr13 | 21742128  | + | Y | Y | Y | Y | Y | del | na | alt-EJ | splicing   | SKA3                   | -   | protein_cod   | 0             | exonic     | SKA3                  | -   | protein_cod   | 0             |
| 168 | chr13 | 21742539  | + | chr13 | 21746479  | + | Y | Y | Y | Y | Y | del | na | alt-EJ | splicing   | SKA3                   | -   | protein_cod   | 0             | exonic     | SKA3                  | -   | protein_cod   | 0             |
| 169 | chr13 | 21746643  | + | chr13 | 21750514  | + | Y | Y | Y | Y | Y | del | na | alt-EJ | exonic     | SKA3                   | -   | protein_cod   | 0             | exonic     | SKA3                  | -   | protein_cod   | 0             |
| 170 | chr13 | 36532283  | + | chr13 | 36532967  | + | N | N | Y | N | N | del | na | alt-EJ | intronic   | DCLK1                  | -   | protein_cod   | 0             | intronic   | DCLK1                 | -   | protein_cod   | 0             |
| 171 | chr13 | 37414466  | + | chr13 | 37414787  | + | Y | Y | N | Y | N | del | na | alt-EJ | intergenic | RFXAP,SMAD9            | +,+ | protein_cod   | 11225;4502    | intergenic | RFXAP,SMAD9           | +,+ | protein_cod   | 11546;4181    |
| 172 | chr13 | 38071941  | + | chr13 | 38085579  | + | Y | Y | Y | Y | Y | del | na | alt-EJ | intergenic | LINC01048,POSTN        | -,- | lincRNA,prc   | 13035;64779   | intergenic | LINC01048,POSTN       | -,- | lincRNA,prc   | 26673;51141   |
| 173 | chr13 | 39934227  | + | chr13 | 39935525  | + | Y | N | N | N | N | del | na | alt-EJ | intronic   | LHFP                   | -   | protein_cod   | 0             | intronic   | LHFP                  | -   | protein_cod   | 0             |
| 174 | chr13 | 46005328  | + | chr13 | 46005665  | + | N | Y | Y | Y | N | del | na | alt-EJ | intergenic | SLC25A30-AS1,PPIAF     | +,+ | lincRNA,psf   | 10822;4928    | intergenic | SLC25A30-AS1,PPIAF2f  | +,+ | lincRNA,psf   | 11159;4591    |
| 175 | chr13 | 46005419  | + | chr13 | 46005757  | + | N | N | N | Y | N | del | na | alt-EJ | intergenic | SLC25A30-AS1,PPIAF     | +,+ | lincRNA,psf   | 10913;4837    | intergenic | SLC25A30-AS1,PPIAF2f  | +,+ | lincRNA,psf   | 11251;4499    |
| 176 | chr13 | 51069348  | + | chr13 | 51075081  | + | Y | Y | Y | Y | Y | del | na | alt-EJ | intergenic | AL138696.1,RP11-175    | -,- | miRNA,lincf   | 131975;25721  | intergenic | AL138696.1,RP11-175B1 | -,- | miRNA,lincf   | 137708;19988  |
| 177 | chr13 | 55941180  | + | chr13 | 55941471  | + | N | N | Y | Y | N | del | na | alt-EJ | intergenic | MIR5007,HNF4GP1        | +,+ | miRNA,psf     | 192497;632154 | intergenic | MIR5007,HNF4GP1       | +,+ | miRNA,psf     | 192788;631863 |
| 178 | chr13 | 57787109  | + | chr13 | 57788381  | + | Y | Y | Y | Y | Y | del | na | alt-EJ | intergenic | MTCO2P3,SLC25A5P       | +,+ | pseudogene    | 8176;101764   | intergenic | MTCO2P3,SLC25A5P4     | +,+ | pseudogene    | 9448;100492   |
| 179 | chr13 | 63569057  | + | chr13 | 63570110  | + | N | Y | N | N | Y | del | na | alt-EJ | intergenic | LINC00448,LINC0037f    | -,- | lincRNA,linc  | 262565;186177 | intergenic | LINC00448,LINC00376   | -,- | lincRNA,linc  | 263618;187124 |
| 180 | chr13 | 65637808  | + | chr13 | 65638211  | + | Y | Y | Y | Y | Y | del | na | NHEJ   | intergenic | LGMNP1,STARP1          | +,+ | pseudogene    | 104280;246179 | intergenic | LGMNP1,STARP1         | +,+ | pseudogene    | 104683;245776 |
| 181 | chr13 | 71197946  | + | chr13 | 71199993  | + | Y | Y | Y | Y | Y | del | na | NHEJ   | intergenic | RNU6-54P,SOGA2P1       | +,+ | snRNA,psf     | 164244;299850 | intergenic | RNU6-54P,SOGA2P1      | +,+ | snRNA,psf     | 166291;297803 |
| 182 | chr13 | 73721884  | + | chr13 | 73724479  | + | Y | Y | Y | N | Y | del | na | alt-EJ | intergenic | AL354720.1,RNU4-10f    | +,+ | miRNA,snR     | 22937;43781   | intergenic | AL354720.1,RNU4-10P   | +,+ | miRNA,snR     | 25532;41186   |
| 183 | chr13 | 78997630  | + | chr13 | 78998741  | + | N | Y | N | N | N | del | na | alt-EJ | ncRNA_intr | RNF219-AS1             | +   | antisense     | 0             | ncRNA_intr | RNF219-AS1            | +   | antisense     | 0             |
| 184 | chr13 | 90862853  | + | chr13 | 90864809  | + | Y | Y | Y | Y | Y | del | na | alt-EJ | intergenic | FAR1P1,KRT18P27        | +,+ | pseudogene    | 38800;19785   | intergenic | FAR1P1,KRT18P27       | +,+ | pseudogene    | 40756;17829   |
| 185 | chr13 | 94040793  | + | chr13 | 94045539  | + | Y | Y | Y | Y | N | del | na | NHEJ   | intronic   | GPC6                   | +   | protein_cod   | 0             | intronic   | GPC6                  | +   | protein_cod   | 0             |
| 186 | chr13 | 101894144 | + | chr13 | 101896246 | + | Y | Y | Y | Y | Y | del | na | alt-EJ | intronic   | NALCN                  | -   | protein_cod   | 0             | intronic   | NALCN                 | -   | protein_cod   | 0             |
| 187 | chr13 | 104091764 | + | chr13 | 104092247 | + | Y | Y | Y | Y | Y | del | na | NHEJ   | intergenic | RP11-123H22.1,ATP6V1   | +,+ | lincRNA,psf   | 11729;5206    | intergenic | RP11-123H22.1,ATP6V1  | +,+ | lincRNA,psf   | 12212;4723    |
| 188 | chr13 | 112932527 | + | chr13 | 112943006 | + | N | Y | N | N | N | del | na | alt-EJ | intergenic | LINC01070,LINC0104     | +,+ | lincRNA,linc  | 77213;35254   | intergenic | LINC01070,LINC01043   | +,+ | lincRNA,linc  | 87692;24775   |
| 189 | chr13 | 112932721 | + | chr13 | 112942987 | + | N | N | N | Y | N | del | na | alt-EJ | intergenic | LINC01070,LINC0104     | +,+ | lincRNA,linc  | 77407;35060   | intergenic | LINC01070,LINC01043   | +,+ | lincRNA,linc  | 876723;24794  |
| 190 | chr13 | 114219610 | + | chr13 | 114220063 | + | N | N | N | N | Y | del | na | alt-EJ | intergenic | TMCO3,TFDP1            | +,+ | protein_cod   | 15068;19403   | intergenic | TMCO3,TFDP1           | +,+ | protein_cod   | 15521;18950   |
| 191 | chr14 | 22881666  | + | chr14 | 22882260  | + | Y | Y | Y | Y | Y | del | na | NHEJ   | ncRNA_intr | AEO00661.37            | -   | processed_    | 0             | ncRNA_intr | AEO00661.37           | -   | processed_    | 0             |
| 192 | chr14 | 23222248  | + | chr14 | 23226449  | + | N | Y | Y | Y | Y | del | na | alt-EJ | intergenic | MYH7,NGDN              | +,+ | protein_cod   | 17321;16649   | intergenic | MYH7,NGDN             | +,+ | protein_cod   | 17722;16248   |
| 193 | chr14 | 25262335  | + | chr14 | 25263126  | + | Y | Y | Y | Y | Y | del | na | alt-EJ | intergenic | RP11-104E19.1,STXB1    | +,+ | antisense,pi  | 135355;16527  | intergenic | RP11-104E19.1,STXBP6  | +,+ | antisense,pi  | 136146;15736  |
| 194 | chr14 | 28869844  | + | chr14 | 28872162  | + | Y | Y | Y | Y | Y | del | na | alt-EJ | ncRNA_intr | CTD-2591A6.2           | +   | lincRNA       | 0             | ncRNA_intr | CTD-2591A6.2          | +   | lincRNA       | 0             |
| 195 | chr14 | 31285720  | + | chr14 | 31289898  | + | Y | N | N | N | N | del | na | alt-EJ | ncRNA_intr | RP11-159L20.2          | +   | antisense     | 0             | intergenic | RP11-159L20.2,COCH    | +   | antisense,pi  | 7080;44761    |
| 196 | chr14 | 37631608  | + | chr14 | 37771229  | + | N | N | N | Y | N | del | na | alt-EJ | intronic   | SLC25A21               | -   | protein_cod   | 0             | intronic   | MIPOL1                | +   | protein_cod   | 0             |
| 197 | chr14 | 39004518  | + | chr14 | 39005028  | + | Y | Y | Y | Y | N | del | na | NHEJ   | intergenic | RP11-96D24.1,RP11-1    | +,+ | lincRNA,psf   | 223384;69941  | intergenic | RP11-96D24.1,RP11-14N | +,+ | lincRNA,psf   | 223894;69431  |
| 198 | chr14 | 45053196  | + | chr14 | 45053821  | + | N | N | N | N | Y | del | na | alt-EJ | intergenic | snoU13,RP11-398E10     | -,- | snoRNA,linc   | 16987;179164  | intergenic | snoU13,RP11-398E10.1  | -,- | snoRNA,linc   | 17612;178539  |
| 199 | chr14 | 50540127  | + | chr14 | 50541667  | + | Y | Y | Y | Y | Y | del | na | alt-EJ | ncRNA_intr | RP11-58E21.5,RP11-58E  | -,- | lincRNA,linc  | 0             | ncRNA_intr | RP11-58E21.5,RP11-58E | -,- | lincRNA,linc  | 0             |
| 200 | chr14 | 51408901  | + | chr14 | 51409546  | + | Y | Y | Y | Y | Y | del | na | alt-EJ | intronic   | PYGL                   | -   | protein_cod   | 0             | intronic   | PYGL                  | -   | protein_cod   | 0             |
| 201 | chr14 | 53252466  | + | chr14 | 53255080  | + | N | N | Y | Y | Y | del | na | NHEJ   | ncRNA_exo  | RN7S588P               | +   | misc_RNA      | 0             | intronic   | GNPNAT1               | -   | protein_cod   | 0             |
| 202 | chr14 | 53252709  | + | chr14 | 53254971  | + | Y | N | N | N | N | del | na | alt-EJ | intronic   | GNPNAT1                | -   | protein_cod   | 0             | intronic   | GNPNAT1               | -   | protein_cod   | 0             |
| 203 | chr14 | 54710347  | + | chr14 | 54713687  | + | Y | Y | Y | Y | Y | del | na | alt-EJ | intergenic | ATP5C1P1,CDKN3         | +,+ | pseudogene    | 251634;153326 | intergenic | ATP5C1P1,CDKN3        | +,+ | pseudogene    | 254974;149986 |
| 204 | chr14 | 59883478  | + | chr14 | 59884079  | + | Y | Y | Y | Y | Y | del | na | NHEJ   | intergenic | AL159140.1,GPR135      | +,+ | miRNA,prot    | 16609;12262   | intergenic | AL159140.1,GPR135     | +,+ | miRNA,prot    | 17210;11661   |
| 205 | chr14 | 63621574  | + | chr14 | 63621869  | + | N | Y | N | Y | N | del | na | alt-EJ | intergenic | RP11-1112J20.2,RHOJ    | +,+ | lincRNA,prc   | 26642;49258   | intergenic | RP11-1112J20.2,RHOJ   | +,+ | lincRNA,prc   | 26937;48963   |
| 206 | chr14 | 73953750  | + | chr14 | 73954051  | + | N | N | Y | N | N | del | na | alt-EJ | intronic   | HEATR4                 | -   | protein_cod   | 0             | intronic   | HEATR4                | -   | protein_cod   | 0             |
| 207 | chr14 | 83203928  | + | chr14 | 83206864  | + | N | Y | Y | Y | Y | del | na | NHEJ   | intergenic | RP11-406A9.2,RP11-1    | +,+ | lincRNA,linc  | 30759;50894   | intergenic | RP11-406A9.2,RP11-11K | +,+ | lincRNA,linc  | 33695;47958   |
| 208 | chr14 | 83852040  | + | chr14 | 83852364  | + | N | Y | Y | Y | Y | del | na | NHEJ   | intergenic | RNU7-51P,RNU6ATAC2     | +,+ | snRNA,snR     | 337056;364688 | intergenic | RNU7-51P,RNU6ATAC2f   | +,+ | snRNA,snR     | 337380;364364 |
| 209 | chr14 | 85297112  | + | chr14 | 85297160  | + | Y | Y | Y | Y | Y | del | na | alt-EJ | intergenic | RNU6-976P,RP11-688D    | +,+ | snRNA,psf     | 90716;120506  | intergenic | RNU6-976P,RP11-688D1  | +,+ | snRNA,psf     | 95764;115458  |
| 210 | chr14 | 93651375  | + | chr14 | 93652603  | + | N | Y | N | N | Y | del | na | alt-EJ | UTRS       | TMEM251,RP11-371E      | +,+ | protein_cod   | 0             | splicing   | TMEM251,RP11-371E.4   | +,+ | protein_cod   | 0             |
| 211 | chr14 | 98783991  | + | chr14 | 98785099  | + | Y | Y | Y | Y | Y | del | na | alt-EJ | intergenic | RP11-61O1.1,AL163760   | +,+ | lincRNA,mif   | 112511;13978  | intergenic | RP11-61O1.1,AL163760  | +,+ | lincRNA,mif   | 113619;12870  |
| 212 | chr14 | 103575504 | + | chr14 | 103575865 | + | N | N | N | N | Y | del | na | alt-EJ | intronic   | EXOC3L4                | +   | protein_cod   | 0             | intronic   | EXOC3L4               | +   | protein_cod   | 0             |
| 213 | chr14 | 103575598 | + | chr14 | 103576055 | + | Y | N | N | N | N | del | na | alt-EJ | intronic   | EXOC3L4                | +   | protein_cod   | 0             | intronic   | EXOC3L4               | +   | protein_cod   | 0             |
| 214 | chr14 | 106082667 | + | chr14 | 106227334 | + | N | Y | Y | Y | N | del | na | alt-EJ | intergenic | RP11-731F5.1,IGHG4     | -,- | lincRNA,IG    | 10973;8020    | intergenic | IGHG1,IGHG3           | -,- | IG_C_gene     | 17928;8105    |
| 215 | chr14 | 106449027 | + | chr14 | 106450849 | + | Y | Y | Y | Y | Y | del | na | NHEJ   | intergenic | AB019441.29,IGHV1-2    | +,+ | pseudogene    | 3794;3644     | intergenic | AB019441.29,IGHV1-2   | +,+ | pseudogene    | 5616;1822     |
| 216 | chr14 | 106932638 | + | chr14 | 107174929 | + | N | N | N | Y | Y | del | na | alt-EJ | intergenic | IGHVII-43.1,IGHVIII-44 | -,- | IG_V_pseu     | 3750;1588     | intergenic | IGHV1-69,IGHV2-70     | -,- | IG_V_gene     | 4501;3891     |
| 217 | chr15 | 22373078  | + | chr15 | 22383653  | + | Y | Y | Y | Y | Y | del | na | NHEJ   | ncRNA_intr | RP11-69H14.6           | -   | sense_over    | 0             | ncRNA_exo  | RP11-69H14.6          | -   | sense_over    | 0             |
| 218 | chr15 | 23671483  | + | chr15 | 23675291  | + | N | N | N | Y | N | del | na | alt-EJ | intergenic | GOLGA8S,RP11-529J      | +,+ | protein_cod   | 61202;4503    | upstream   | RP11-529J17.3         | +   | pseudogene    | 0             |
| 219 | chr15 | 25931396  | + | chr15 | 25932381  | + | Y | Y | Y | Y | Y | del | na | NHEJ   | intronic   | ATP10A                 | -   | protein_cod   | 0             | intronic   | ATP10A                | -   | protein_cod   | 0             |
| 220 | chr15 | 29411478  | + | chr15 | 29411901  | + | Y | Y | Y | Y | Y | del | na | alt-EJ | downstream | FAM189A1               | +,+ | protein_cod   | 0             | downstream | FAM189A1              | +,+ | protein_cod   | 0             |
| 221 | chr15 | 39744386  | + | chr15 | 39744856  | + | Y | Y | Y | Y | Y | del | na | alt-EJ | intergenic | RP11-624L4.1,RP11-6    | +,+ | antisense,lir | 24990;20518   | intergenic | RP11-624L4.1,RP11-624 | +,+ | antisense,lir | 25460;20048   |
| 222 | chr15 | 41851540  | + |       |           |   |   |   |   |   |   |     |    |        |            |                        |     |               |               |            |                       |     |               |               |

|     |       |          |   |       |          |   |   |   |   |   |   |   |     |    |        |                |                     |     |               |               |                |                       |     |               |               |
|-----|-------|----------|---|-------|----------|---|---|---|---|---|---|---|-----|----|--------|----------------|---------------------|-----|---------------|---------------|----------------|-----------------------|-----|---------------|---------------|
| 247 | chr16 | 59536169 | + | chr16 | 59793000 | + | N | N | N | N | Y | N | del | na | alt-EJ | intergenic     | AC040163.1,RNU4-58  | +,+ | miRNA,snr     | 87420;37861   | intergenic     | APOOP5,RP11-430C1.1   | -,+ | pseudogene    | 4070;96257    |
| 248 | chr16 | 85149504 | + | chr16 | 85150093 | + | N | N | Y | Y | Y | Y | del | na | alt-EJ | intergenic     | FAM92B,CTC-786C10   | -,+ | protein_cod   | 3390;55378    | intergenic     | FAM92B,CTC-786C10.1   | -,+ | protein_cod   | 3979;54789    |
| 249 | chr16 | 88311034 | + | chr16 | 88312838 | + | N | N | Y | N | N | N | del | na | alt-EJ | ncRNA_intrn    | LA16c-444G7.1       | -,+ | lincRNA       | 0             | ncRNA_intrn    | LA16c-444G7.1         | -,+ | lincRNA       | 0             |
| 250 | chr16 | 89967838 | + | chr16 | 89969150 | + | Y | N | N | Y | Y | Y | del | na | alt-EJ | intronic       | TCF25               | -   | protein_cod   | 0             | intronic       | TCF25                 | -   | protein_cod   | 0             |
| 251 | chr17 | 1913188  | + | chr17 | 1913663  | + | N | N | N | N | Y | N | del | na | alt-EJ | intronic       | RTN4RL1             | -   | protein_cod   | 0             | intronic       | RTN4RL1               | -   | protein_cod   | 0             |
| 252 | chr17 | 4697074  | + | chr17 | 4701535  | + | N | Y | N | N | Y | N | del | na | alt-EJ | intergenic     | GLTPD2,PSMB6        | +,+ | protein_cod   | 0             | intronic       | PSMB6                 | +   | protein_cod   | 0             |
| 253 | chr17 | 7524422  | + | chr17 | 7524931  | + | Y | Y | Y | N | Y | N | del | na | alt-EJ | intronic       | SHBG                | +   | protein_cod   | 0             | intronic       | SHBG                  | +   | protein_cod   | 0             |
| 254 | chr17 | 8246703  | + | chr17 | 8247925  | + | Y | N | N | N | N | N | del | na | alt-EJ | intronic       | ODF4                | -   | protein_cod   | 0             | intronic       | ODF4                  | -   | protein_cod   | 0             |
| 255 | chr17 | 8711646  | + | chr17 | 8713994  | + | Y | Y | Y | Y | Y | N | del | na | alt-EJ | intronic       | PIK3R6              | -   | protein_cod   | 0             | intronic       | PIK3R6                | -   | protein_cod   | 0             |
| 256 | chr17 | 11411667 | + | chr17 | 11412338 | + | N | N | N | Y | N | N | del | na | NHEJ   | intronic;intrn | SHISA6              | -   | protein_cod   | 0             | intronic;intrn | SHISA6                | -   | protein_cod   | 0             |
| 257 | chr17 | 15183463 | + | chr17 | 15185720 | + | Y | N | N | N | N | N | del | na | alt-EJ | upstream;ur    | AC005703.2          | +   | lincRNA       | 0             | intergenic;ir  | AC005703.2,TEKT3      | -,+ | lincRNA,prc   | 2926;21408    |
| 258 | chr17 | 15723934 | + | chr17 | 20541155 | + | Y | N | N | N | N | N | del | na | alt-EJ | intergenic     | AC015922.6,AC01592  | -,+ | lincRNA,ps    | 2878;8749     | intergenic     | RP11-218E15.1,AC0874  | -,+ | pseudogene    | 4583;9445     |
| 259 | chr17 | 15771553 | + | chr17 | 15772071 | + | Y | N | N | N | N | N | del | na | alt-EJ | intergenic     | AC015922.5,ADORA2I  | +,+ | pseudogene    | 4086;76678    | intergenic     | AC015922.5,ADORA2B    | +,+ | pseudogene    | 4604;76160    |
| 260 | chr17 | 15789557 | + | chr17 | 15793785 | + | Y | Y | Y | Y | Y | Y | del | na | NHEJ   | intergenic     | AC015922.5,ADORA2I  | +,+ | pseudogene    | 22090;58674   | intergenic     | AC015922.5,ADORA2B    | +,+ | pseudogene    | 26318;54446   |
| 261 | chr17 | 17230369 | + | chr17 | 17231246 | + | Y | Y | Y | Y | Y | Y | del | na | alt-EJ | intronic       | NT5M                | +   | protein_cod   | 0             | intronic       | NT5M                  | +   | protein_cod   | 0             |
| 262 | chr17 | 21212906 | + | chr17 | 21221183 | + | Y | Y | Y | Y | Y | Y | del | na | NHEJ   | intronic       | MAP2K3              | +   | protein_cod   | 0             | intronic       | MAP2K3,KCNJ12         | +,+ | protein_cod   | 2631;58326    |
| 263 | chr17 | 21321277 | + | chr17 | 21322822 | + | N | Y | N | N | N | N | del | na | alt-EJ | UTR3;UTR;      | KCNJ12              | +   | protein_cod   | 0             | UTR3;UTR;      | KCNJ12                | +   | protein_cod   | 0             |
| 264 | chr17 | 21334291 | + | chr17 | 21341613 | + | Y | N | N | N | N | N | del | na | alt-EJ | intergenic     | KCNJ12,PDLIM1P2     | -,+ | protein_cod   | 11112;13854   | intergenic     | KCNJ12,PDLIM1P2       | -,+ | protein_cod   | 18434;6532    |
| 265 | chr17 | 21556718 | + | chr17 | 21558070 | + | N | Y | Y | N | N | N | del | na | alt-EJ | intergenic     | AC144838.2,AC14483  | +,+ | pseudogene    | 6739;3830     | intergenic     | AC144838.2,AC144838.3 | +,+ | pseudogene    | 8091;2478     |
| 266 | chr17 | 25536546 | + | chr17 | 25540389 | + | Y | Y | Y | Y | Y | Y | del | na | alt-EJ | intergenic     | TUFMP1,RP11-663N2   | -,+ | pseudogene    | 125484;28339  | intergenic     | TUFMP1,RP11-663N2.1   | -,+ | pseudogene    | 129327;24496  |
| 267 | chr17 | 35778946 | + | chr17 | 35778170 | + | N | Y | N | N | N | N | del | na | alt-EJ | intronic       | TADA2A              | -   | protein_cod   | 0             | intronic       | TADA2A                | -   | protein_cod   | 0             |
| 268 | chr17 | 38377919 | + | chr17 | 38378393 | + | Y | Y | Y | Y | Y | Y | del | na | alt-EJ | intronic       | WIPF2               | -   | protein_cod   | 0             | intronic       | WIPF2                 | -   | protein_cod   | 0             |
| 269 | chr17 | 43258203 | + | chr17 | 43258445 | + | N | N | N | Y | N | N | del | na | alt-EJ | intergenic     | RP13-890H12.2,CTD-7 | -,+ | antisense,ai  | 9252;10095    | intergenic     | RP13-890H12.2,CTD-20  | -,+ | antisense,ai  | 9494;9853     |
| 270 | chr17 | 47351758 | + | chr17 | 47353062 | + | Y | Y | Y | Y | Y | Y | del | na | alt-EJ | intergenic     | RP1-62O9.3,ZNF652   | -,+ | processed_    | 15734;14812   | intergenic     | RP1-62O9.3,ZNF652     | -,+ | processed_    | 17038;13508   |
| 271 | chr17 | 48427504 | + | chr17 | 48427889 | + | Y | Y | N | Y | Y | Y | del | na | alt-EJ | intronic       | XYLT2               | -   | protein_cod   | 0             | intronic       | XYLT2                 | -   | protein_cod   | 0             |
| 272 | chr17 | 51442981 | + | chr17 | 51447478 | + | Y | Y | Y | Y | Y | Y | del | na | alt-EJ | intergenic     | RP11-146P2.1,CTD-25 | -,+ | pseudogene    | 11486;68511   | intergenic     | RP11-146P2.1,CTD-253  | -,+ | pseudogene    | 15983;64014   |
| 273 | chr17 | 55687810 | + | chr17 | 55689916 | + | Y | Y | Y | Y | Y | Y | del | na | alt-EJ | intronic       | MSI2                | +   | protein_cod   | 0             | intronic       | MSI2                  | +   | protein_cod   | 0             |
| 274 | chr17 | 57363927 | + | chr17 | 57365718 | + | N | N | N | N | N | Y | del | na | alt-EJ | intergenic     | SNRPGP17,YPEL2      | +,+ | pseudogene    | 5223;45136    | intergenic     | SNRPGP17,YPEL2        | +,+ | pseudogene    | 7014;43345    |
| 275 | chr17 | 57363961 | + | chr17 | 57365746 | + | Y | N | Y | N | N | N | del | na | alt-EJ | intergenic     | SNRPGP17,YPEL2      | +,+ | pseudogene    | 5257;45102    | intergenic     | SNRPGP17,YPEL2        | +,+ | pseudogene    | 7042;43317    |
| 276 | chr17 | 57870215 | + | chr17 | 57871185 | + | Y | Y | N | N | N | N | del | na | NHEJ   | intronic       | VMP1                | +   | protein_cod   | 0             | intronic;intrn | VMP1                  | +   | protein_cod   | 0             |
| 277 | chr17 | 57870847 | + | chr17 | 57871185 | + | N | N | N | N | N | Y | del | na | alt-EJ | intronic       | VMP1                | +   | protein_cod   | 0             | intronic;intrn | VMP1                  | +   | protein_cod   | 0             |
| 278 | chr17 | 72729270 | + | chr17 | 72729683 | + | N | N | N | N | Y | N | del | na | alt-EJ | intronic       | RAB37               | -   | protein_cod   | 0             | intronic       | RAB37                 | -   | protein_cod   | 0             |
| 279 | chr17 | 80929429 | + | chr17 | 80930070 | + | N | N | N | N | N | Y | del | na | alt-EJ | intronic       | B3GNTL1             | -   | protein_cod   | 0             | intronic       | B3GNTL1               | -   | protein_cod   | 0             |
| 280 | chr18 | 10222279 | + | chr18 | 10223606 | + | Y | N | N | Y | Y | Y | del | na | alt-EJ | intergenic     | RP11-419J16.1,RP11- | -,+ | lincRNA,linc  | 77876;100850  | intergenic     | RP11-419J16.1,RP11-13 | -,+ | lincRNA,linc  | 79203;99523   |
| 281 | chr18 | 14450641 | + | chr18 | 14460493 | + | N | N | Y | N | N | N | del | na | NHEJ   | ncRNA_exo      | LONRF2P1            | -   | pseudogene    | 0             | intergenic     | LONRF2P1,CXADRP3      | -,+ | pseudogene    | 9611;17461    |
| 282 | chr18 | 21903367 | + | chr18 | 21904599 | + | Y | N | Y | Y | Y | Y | del | na | alt-EJ | intronic       | OSBPL1A             | -   | protein_cod   | 0             | intronic       | OSBPL1A               | -   | protein_cod   | 0             |
| 283 | chr18 | 24571620 | + | chr18 | 24572342 | + | Y | Y | Y | Y | Y | Y | del | na | NHEJ   | ncRNA_intrn    | AQP4-AS1            | +   | antisense     | 0             | ncRNA_intrn    | AQP4-AS1              | +   | antisense     | 0             |
| 284 | chr18 | 24791587 | + | chr18 | 24791872 | + | Y | N | N | Y | Y | Y | del | na | alt-EJ | intergenic     | AQP4-AS1,RP11-57J1  | +,+ | antisense,lir | 20925;14119   | intergenic     | AQP4-AS1,RP11-57J16   | +,+ | antisense,lir | 21210;13834   |
| 285 | chr18 | 27094934 | + | chr18 | 27102699 | + | Y | Y | Y | N | Y | Y | del | na | alt-EJ | intergenic     | AC091321.1,RP11-784 | +,+ | miRNA,lincf   | 31546;3290    | ncRNA_intrn    | RP11-784B15.1         | +,+ | lincRNA       | 0             |
| 286 | chr18 | 36716289 | + | chr18 | 36716723 | + | N | Y | N | Y | Y | N | del | na | alt-EJ | intergenic     | RNU6-706P,LINC00669 | -,+ | snRNA,lincf   | 102215;70599  | intergenic     | RNU6-706P,LINC00669   | -,+ | snRNA,lincf   | 102649;70165  |
| 287 | chr18 | 38006375 | + | chr18 | 38007002 | + | Y | Y | Y | Y | Y | Y | del | na | alt-EJ | intergenic     | RPL17P45,RNU7-145P  | -,+ | pseudogene    | 281907;46410  | intergenic     | RPL17P45,RNU7-145P    | -,+ | pseudogene    | 282534;45783  |
| 288 | chr18 | 38259892 | + | chr18 | 38266750 | + | Y | Y | Y | Y | Y | Y | del | na | NHEJ   | intergenic     | RNU7-145P,RP11-142I | -,+ | snRNA,lincf   | 207046;787503 | intergenic     | RNU7-145P,RP11-142I   | -,+ | snRNA,lincf   | 213904;780645 |
| 289 | chr18 | 49196757 | + | chr18 | 49198894 | + | Y | N | Y | N | N | N | del | na | alt-EJ | intergenic     | RSI24D1P9,RP11-440L | -,+ | pseudogene    | 57277;17138   | intergenic     | RSI24D1P9,RP11-440L   | -,+ | pseudogene    | 59414;15001   |
| 290 | chr18 | 50462566 | + | chr18 | 50463032 | + | Y | Y | Y | Y | Y | Y | del | na | alt-EJ | intronic       | DCC                 | +   | protein_cod   | 0             | intronic       | DCC                   | +   | protein_cod   | 0             |
| 291 | chr18 | 54946737 | + | chr18 | 54948718 | + | Y | Y | Y | Y | Y | Y | del | na | NHEJ   | intergenic     | CTD-252M8.2,RNU6-73 | -,+ | lincRNA,snf   | 108312;5096   | intergenic     | CTD-252M8.2,RNU6-73   | -,+ | lincRNA,snf   | 110293;3115   |
| 292 | chr18 | 63723838 | + | chr18 | 63732369 | + | Y | Y | Y | Y | Y | Y | del | na | alt-EJ | intergenic     | RP11-389J22.3,PRPF1 | -,+ | lincRNA,ps    | 135660;12148  | intergenic     | RP11-389J22.3,PRPF191 | -,+ | lincRNA,ps    | 144191;3617   |
| 293 | chr18 | 64006979 | + | chr18 | 64008004 | + | Y | Y | Y | Y | Y | Y | del | na | alt-EJ | intergenic     | PRPF19P1,CDH19      | -,+ | pseudogene    | 270096;161341 | intergenic     | PRPF19P1,CDH19        | -,+ | pseudogene    | 271121;160316 |
| 294 | chr18 | 64219705 | + | chr18 | 64221256 | + | Y | Y | Y | Y | Y | Y | del | na | alt-EJ | intronic       | CDH19               | -   | protein_cod   | 0             | intronic       | CDH19                 | -   | protein_cod   | 0             |
| 295 | chr18 | 64786415 | + | chr18 | 64786994 | + | N | Y | Y | Y | Y | Y | del | na | alt-EJ | intergenic     | MIR5011,RPL31P9     | -,+ | miRNA,ps      | 37492;18433   | intergenic     | MIR5011,RPL31P9       | -,+ | miRNA,ps      | 38071;17854   |
| 296 | chr18 | 66228957 | + | chr18 | 66229336 | + | Y | Y | Y | Y | Y | Y | del | na | NHEJ   | intergenic     | RP11-585K6.2,TMX3   | +,+ | pseudogene    | 33597;111968  | intergenic     | RP11-585K6.2,TMX3     | +,+ | pseudogene    | 33976;111589  |
| 297 | chr18 | 66745596 | + | chr18 | 66757002 | + | Y | Y | Y | Y | Y | Y | del | na | alt-EJ | intergenic     | CCDC102B,RP11-674P1 | +,+ | protein_cod   | 23170;133918  | intergenic     | CCDC102B,RP11-674P1   | +,+ | protein_cod   | 34576;122512  |
| 298 | chr18 | 75266997 | + | chr18 | 75268160 | + | Y | Y | Y | Y | Y | Y | del | na | NHEJ   | ncRNA_intrn    | RP11-176N18.2       | +,+ | lincRNA       | 0             | ncRNA_intrn    | RP11-176N18.2         | +,+ | lincRNA       | 0             |
| 299 | chr18 | 77309944 | + | chr18 | 77312085 | + | N | Y | N | N | Y | Y | del | na | alt-EJ | intergenic     | NFATC1,RP11-567M1   | +,+ | protein_cod   | 20619;26516   | intergenic     | NFATC1,RP11-567M16.1  | +,+ | protein_cod   | 22760;24375   |
| 300 | chr19 | 605299   | + | chr19 | 608344   | + | Y | Y | N | Y | N | N | del | na | alt-EJ | intronic;intrn | HCN2                | +,+ | protein_cod   | 0             | intronic;intrn | HCN2                  | +,+ | protein_cod   | 0             |
| 301 | chr19 | 3173295  | + | chr19 | 3175832  | + | N | Y | N | Y | N | N | del | na | alt-EJ | intergenic     | GNA15,S1PR4         | +,+ | protein_cod   | 9528;5441     | intergenic     | GNA15,S1PR4           | +,+ | protein_cod   | 12065;2904    |
| 302 | chr19 | 4511351  | + | chr19 | 4511550  | + | N | Y | Y | N | N | N | del | na | alt-EJ | exonic         | PLIN4               | -   | protein_cod   | 0             | exonic         | PLIN4                 | -   | protein_cod   | 0             |
| 303 | chr19 | 8243000  | + | chr19 | 8244947  | + | Y | Y | Y | Y | Y | Y | del | na | alt-EJ | intergenic     | CTD-3020H12.3,CERS4 | +,+ | pseudogene    | 2549;28620    | intergenic     | CTD-3020H12.3,CERS4   | +,+ | pseudogene    | 4496;26673    |
| 304 | chr19 | 9222947  | + | chr19 | 9225125  | + | N | N | N | Y | N | N | del | na | alt-EJ | intergenic     | OR7G2,OR7G1         | -,+ | protein_cod   | 8965;2327     | downstream     | OR7G1                 | -   | protein_cod   | 0             |
| 305 | chr19 | 14732337 | + | chr19 | 14734135 | + | Y | Y | Y | Y | Y | N | del | na | alt-EJ | intronic       | EMR3                | -   | protein_cod   | 0             | intronic       |                       |     |               |               |

|     |       |           |   |       |           |   |   |   |   |   |   |     |    |        |             |                      |   |              |               |             |                         |   |              |               |
|-----|-------|-----------|---|-------|-----------|---|---|---|---|---|---|-----|----|--------|-------------|----------------------|---|--------------|---------------|-------------|-------------------------|---|--------------|---------------|
| 331 | chr2  | 51224547  | + | chr2  | 51225543  | + | Y | Y | Y | Y | Y | del | na | NHEJ   | intronic    | NRXN1                | - | protein_cod  | 0             | intronic    | NRXN1                   | - | protein_cod  | 0             |
| 332 | chr2  | 537770842 | + | chr2  | 537771858 | + | N | N | N | N | Y | del | na | NHEJ   | intronic    | GPR75-ASB3           | - | protein_cod  | 0             | intronic    | GPR75-ASB3              | - | protein_cod  | 0             |
| 333 | chr2  | 59623256  | + | chr2  | 59631049  | + | Y | Y | Y | Y | Y | del | na | NHEJ   | ncRNA_intrn | AC007131.2,RP11-444A | - | lincRNA,linc | 0             | ncRNA_intrn | AC007131.2,RP11-444A    | - | lincRNA,linc | 0             |
| 334 | chr2  | 66505591  | + | chr2  | 66507556  | + | Y | Y | Y | Y | Y | del | na | alt-EJ | intergenic  | AC118345.2,AC09268   | + | miRNA,lincf  | 38805;48890   | intergenic  | AC118345.2,AC09268.2    | + | miRNA,lincf  | 40770;46925   |
| 335 | chr2  | 76557056  | + | chr2  | 76557291  | + | N | N | N | N | N | del | na | NHEJ   | intergenic  | RP11-335E8.1,RN7SKP  | - | pseudogene   | 68269;115149  | intergenic  | RP11-335E8.1,RN7SKP2    | - | pseudogene   | 68504;114914  |
| 336 | chr2  | 76773553  | + | chr2  | 76775453  | + | Y | Y | N | N | Y | del | na | alt-EJ | intergenic  | AC105399.2,AC07362   | + | misc_RNA,r   | 101071;48986  | intergenic  | irRN7SKP203,RN7SKP16    | - | misc_RNA,r   | 102917;47086  |
| 337 | chr2  | 78117890  | + | chr2  | 78118358  | + | Y | Y | Y | Y | Y | del | na | NHEJ   | intergenic  | AC105399.2,AC07362   | + | pseudogene   | 97677;25170   | intergenic  | AC105399.2,AC07362.1    | + | pseudogene   | 98145;24702   |
| 338 | chr2  | 90413527  | + | chr2  | 91634219  | + | N | N | Y | N | N | del | na | alt-EJ | intergenic  | AC113612.1,CH17-132  | + | pseudogene   | 113125;44674  | intergenic  | RP11-685N3.1,AC01869    | + | protein_cod  | 1095822;1712  |
| 339 | chr2  | 90447804  | + | chr2  | 90450048  | + | N | N | N | N | N | del | na | alt-EJ | intergenic  | AC113612.1,CH17-132  | + | pseudogene   | 147402;10397  | intergenic  | AC113612.1,CH17-132F    | + | pseudogene   | 149646;8153   |
| 340 | chr2  | 90447804  | + | chr2  | 90450238  | + | N | N | Y | N | N | del | na | alt-EJ | intergenic  | AC113612.1,CH17-132  | + | pseudogene   | 147402;10397  | intergenic  | AC113612.1,CH17-132F    | + | pseudogene   | 149836;7963   |
| 341 | chr2  | 90449641  | + | chr2  | 91670390  | + | N | N | Y | N | N | del | na | alt-EJ | intergenic  | AC113612.1,CH17-132  | + | pseudogene   | 149239;8560   | intergenic  | AC018696.1,IGKV1OR2     | + | pseudogene   | 34241;8697    |
| 342 | chr2  | 91670558  | + | chr2  | 91671000  | + | N | N | Y | N | N | del | na | alt-EJ | intergenic  | AC018696.1,IGKV1OR   | + | pseudogene   | 34409;8529    | intergenic  | AC018696.1,IGKV1OR2     | + | pseudogene   | 34851;8087    |
| 343 | chr2  | 91671059  | + | chr2  | 91671211  | + | N | N | Y | N | N | del | na | alt-EJ | intergenic  | AC018696.1,IGKV1OR   | + | pseudogene   | 34910;8028    | intergenic  | AC018696.1,IGKV1OR2     | + | pseudogene   | 35062;7876    |
| 344 | chr2  | 91751061  | + | chr2  | 91759768  | + | Y | Y | Y | Y | Y | del | na | alt-EJ | intergenic  | AC018696.7,AC01869   | + | pseudogene   | 10268;15476   | intergenic  | AC018696.7,AC018696.4   | + | pseudogene   | 18975;6769    |
| 345 | chr2  | 98385314  | + | chr2  | 98385711  | + | Y | Y | Y | Y | Y | del | na | alt-EJ | intronic    | TMEM131              | - | protein_cod  | 0             | intronic    | TMEM131                 | - | protein_cod  | 0             |
| 346 | chr2  | 109635158 | + | chr2  | 109636127 | + | Y | Y | Y | Y | Y | del | na | NHEJ   | intergenic  | EDAR,SH3RF3-AS1      | - | protein_cod  | 29330;108625  | intergenic  | EDAR,SH3RF3-AS1         | - | protein_cod  | 30299;107656  |
| 347 | chr2  | 115628105 | + | chr2  | 115628845 | + | Y | Y | Y | Y | Y | del | na | alt-EJ | intronic    | DPP10                | - | protein_cod  | 0             | intronic    | DPP10                   | - | protein_cod  | 0             |
| 348 | chr2  | 116974633 | + | chr2  | 116978304 | + | Y | Y | Y | Y | Y | del | na | NHEJ   | intergenic  | DPP10,RP11-338124.1  | + | protein_cod  | 371305;470161 | intergenic  | DPP10,RP11-338124.1     | + | protein_cod  | 374976;466490 |
| 349 | chr2  | 121797807 | + | chr2  | 121798402 | + | Y | Y | N | N | Y | del | na | alt-EJ | downstream  | Y_RNA                | - | misc_RNA     | 0             | upstream    | Y_RNA                   | - | misc_RNA     | 0             |
| 350 | chr2  | 124170256 | + | chr2  | 124170587 | + | Y | N | N | N | N | del | na | alt-EJ | intergenic  | AC062020.1,AC07340   | + | lincRNA,linc | 339199;30586  | intergenic  | irAC062020.1,AC073409.1 | + | lincRNA,linc | 339530;30255  |
| 351 | chr2  | 127674757 | + | chr2  | 127677274 | + | Y | Y | Y | Y | Y | del | na | alt-EJ | intergenic  | AC114783.1,RNU7-18   | + | protein_cod  | 15084;100240  | intergenic  | AC114783.1,RNU7-182P    | + | protein_cod  | 17601;97723   |
| 352 | chr2  | 129097893 | + | chr2  | 129098612 | + | N | N | N | N | Y | del | na | alt-EJ | intergenic  | HS6ST1,Y_RNA         | - | protein_cod  | 21742;10510   | intergenic  | HS6ST1,Y_RNA            | - | protein_cod  | 22461;9791    |
| 353 | chr2  | 129097893 | + | chr2  | 129098899 | + | N | N | Y | N | N | del | na | alt-EJ | intergenic  | HS6ST1,Y_RNA         | - | protein_cod  | 21742;10510   | intergenic  | HS6ST1,Y_RNA            | - | protein_cod  | 22748;9504    |
| 354 | chr2  | 129097972 | + | chr2  | 129098916 | + | N | N | Y | N | N | del | na | VNTR   | intergenic  | HS6ST1,Y_RNA         | - | protein_cod  | 21821;10431   | intergenic  | HS6ST1,Y_RNA            | - | protein_cod  | 22765;9487    |
| 355 | chr2  | 130824120 | + | chr2  | 130824673 | + | Y | N | N | N | N | del | na | alt-EJ | intergenic  | FAR2P1,POTEF         | - | pseudogene   | 15416;6988    | intergenic  | FAR2P1,POTEF            | - | pseudogene   | 15969;6435    |
| 356 | chr2  | 130954926 | + | chr2  | 130957401 | + | Y | Y | N | Y | Y | del | na | alt-EJ | intronic    | TUBA3E               | - | protein_cod  | 0             | intergenic  | TUBA3E,AC018804.6       | + | protein_cod  | 1367;2484     |
| 357 | chr2  | 132534465 | + | chr2  | 132534928 | + | Y | Y | Y | Y | Y | del | na | alt-EJ | ncRNA_exo   | AC103564.9           | + | pseudogene   | 0             | downstream  | AC103564.9              | + | pseudogene   | 0             |
| 358 | chr2  | 145666463 | + | chr2  | 153910989 | + | N | N | N | N | Y | del | na | NHEJ   | ncRNA_intrn | TEX41                | - | lincRNA      | 0             | intergenic  | UBQLN4P2,ATP5F1P4       | + | pseudogene   | 176708;104463 |
| 359 | chr2  | 146862620 | + | chr2  | 146878864 | + | Y | Y | Y | Y | Y | del | na | alt-EJ | intergenic  | AC062031.1,RNU7-2P   | + | lincRNA,snf  | 173906;40104  | intergenic  | AC062031.1,RNU7-2P      | + | lincRNA,snf  | 188150;25860  |
| 360 | chr2  | 162332269 | + | chr2  | 162334044 | + | Y | Y | N | Y | Y | del | na | alt-EJ | intergenic  | AC009487.5,AHCTF1F   | + | 3prime_ove   | 46984;25127   | intergenic  | AC009487.5,AHCTF1P1     | + | 3prime_ove   | 48759;23352   |
| 361 | chr2  | 166014694 | + | chr2  | 166016746 | + | Y | Y | N | Y | Y | del | na | alt-EJ | intronic    | SCN3A                | - | protein_cod  | 0             | intronic    | SCN3A                   | - | protein_cod  | 0             |
| 362 | chr2  | 173004267 | + | chr2  | 173007500 | + | Y | Y | Y | Y | Y | del | na | alt-EJ | intergenic  | AC104801.1,snoU13    | + | lincRNA,snc  | 29557;16490   | intergenic  | AC104801.1,snoU13       | + | lincRNA,snc  | 32790;13257   |
| 363 | chr2  | 176709476 | + | chr2  | 176709732 | + | N | N | N | N | Y | del | na | alt-EJ | intergenic  | EXTL2P1,AC016751.3   | + | pseudogene   | 1446;52588    | intergenic  | EXTL2P1,AC016751.3      | + | pseudogene   | 1702;52332    |
| 364 | chr2  | 188421854 | + | chr2  | 188422031 | + | N | N | Y | N | N | del | na | alt-EJ | intronic    | TFPI                 | - | protein_cod  | 0             | intronic    | TFPI                    | - | protein_cod  | 0             |
| 365 | chr2  | 194689501 | + | chr2  | 194698766 | + | N | Y | Y | N | N | del | na | NHEJ   | intergenic  | AC074290.1,RP11-764  | + | pseudogene   | 94088;73590   | intergenic  | AC074290.1,RP11-764E    | + | pseudogene   | 103353;64325  |
| 366 | chr2  | 196214815 | + | chr2  | 196215228 | + | Y | N | N | Y | Y | del | na | alt-EJ | intergenic  | AC100983.1,AC06483   | + | lincRNA,linc | 323721;98441  | intergenic  | AC100983.1,AC06483A.1   | + | lincRNA,linc | 324134;98028  |
| 367 | chr2  | 225292981 | + | chr2  | 225293952 | + | Y | N | N | N | N | del | na | NHEJ   | intergenic  | FAM124B,CUL3         | - | protein_cod  | 26179;41886   | intergenic  | irFAM124B,CUL3          | - | protein_cod  | 27150;40915   |
| 368 | chr2  | 227165425 | + | chr2  | 227171171 | + | Y | Y | N | Y | Y | del | na | alt-EJ | intergenic  | AC068138.1,MIR5702   | + | lincRNA,mif  | 115338;358001 | intergenic  | AC068138.1,MIR5702      | + | lincRNA,mif  | 121084;352255 |
| 369 | chr2  | 234305842 | + | chr2  | 234306174 | + | N | N | Y | N | N | del | na | alt-EJ | intronic    | DGKD                 | + | protein_cod  | 0             | intronic    | DGKD                    | + | protein_cod  | 0             |
| 370 | chr2  | 238453404 | + | chr2  | 238453926 | + | N | N | Y | N | N | del | na | alt-EJ | intronic    | MLPH                 | + | protein_cod  | 0             | intronic    | MLPH                    | + | protein_cod  | 0             |
| 371 | chr2  | 239500396 | + | chr2  | 239501734 | + | Y | Y | Y | Y | Y | del | na | alt-EJ | intergenic  | LINC011107,AC113618  | + | lincRNA,linc | 36701;128569  | intergenic  | LINC011107,AC113618.1   | + | lincRNA,linc | 38039;127231  |
| 372 | chr2  | 239779733 | + | chr2  | 239779903 | + | N | N | N | N | N | del | na | VNTR   | intronic    | TWIST2               | + | protein_cod  | 0             | intronic    | TWIST2                  | + | protein_cod  | 0             |
| 373 | chr2  | 239779735 | + | chr2  | 239779924 | + | N | N | N | N | Y | del | na | VNTR   | intronic    | TWIST2               | + | protein_cod  | 0             | intronic    | TWIST2                  | + | protein_cod  | 0             |
| 374 | chr2  | 240564317 | + | chr2  | 240565123 | + | N | N | N | N | Y | del | na | alt-EJ | intergenic  | AC079612.2,RP11-315F | + | lincRNA,linc | 11784;92333   | intergenic  | AC079612.2,RP11-315F    | + | lincRNA,linc | 12590;91527   |
| 375 | chr2  | 241782021 | + | chr2  | 241782917 | + | N | N | N | N | Y | del | na | alt-EJ | intergenic  | KIF1A,AGXT           | + | protein_cod  | 22296;25875   | intergenic  | KIF1A,AGXT              | + | protein_cod  | 23192;24979   |
| 376 | chr2  | 242506103 | + | chr2  | 242507335 | + | N | N | Y | N | N | del | na | alt-EJ | intronic    | intrCBK              | + | protein_cod  | 0             | intronic    | intrCBK                 | + | protein_cod  | 0             |
| 377 | chr2  | 242614134 | + | chr2  | 242615736 | + | Y | Y | Y | Y | N | del | na | alt-EJ | downstream  | ATG4B                | + | protein_cod  | 0             | intronic    | DTYMK                   | - | protein_cod  | 0             |
| 378 | chr20 | 1389144   | + | chr20 | 1390816   | + | Y | Y | Y | Y | Y | del | na | alt-EJ | intergenic  | FKBP1A,NSFL1C        | - | protein_cod  | 15338;33663   | intergenic  | FKBP1A,NSFL1C           | - | protein_cod  | 17010;31991   |
| 379 | chr20 | 5534546   | + | chr20 | 5534923   | + | Y | Y | Y | N | Y | del | na | alt-EJ | intronic    | GPCPD1               | - | protein_cod  | 0             | intronic    | GPCPD1                  | - | protein_cod  | 0             |
| 380 | chr20 | 15301732  | + | chr20 | 15303770  | + | Y | Y | Y | Y | Y | del | na | alt-EJ | intronic    | MACROD2              | + | protein_cod  | 0             | intronic    | MACROD2                 | + | protein_cod  | 0             |
| 381 | chr20 | 17927392  | + | chr20 | 17979413  | + | N | N | Y | N | N | del | na | alt-EJ | intronic    | SNX5                 | + | protein_cod  | 0             | intergenic  | MGME1,PTMAP3            | + | protein_cod  | 7648;13186    |
| 382 | chr20 | 21286040  | + | chr20 | 21288841  | + | Y | N | N | Y | N | del | na | alt-EJ | intronic    | XRN2                 | + | protein_cod  | 0             | intronic    | XRN2                    | + | protein_cod  | 0             |
| 383 | chr20 | 21286106  | + | chr20 | 21288788  | + | Y | N | Y | Y | N | del | na | alt-EJ | intronic    | XRN2                 | + | protein_cod  | 0             | intronic    | XRN2                    | + | protein_cod  | 0             |
| 384 | chr20 | 23103195  | + | chr20 | 23103634  | + | N | Y | Y | N | N | del | na | alt-EJ | intergenic  | CD93,LINC00656       | - | protein_cod  | 36218;2510    | intergenic  | CD93,LINC00656          | - | protein_cod  | 36657;2071    |
| 385 | chr20 | 23103301  | + | chr20 | 23103635  | + | N | N | N | Y | Y | del | na | alt-EJ | intergenic  | CD93,LINC00656       | - | protein_cod  | 36324;2404    | intergenic  | CD93,LINC00656          | - | protein_cod  | 36658;2070    |
| 386 | chr20 | 23683546  | + | chr20 | 23746262  | + | N | Y | N | N | Y | del | na | alt-EJ | intergenic  | CST4,CST2P1          | - | protein_cod  | 13869;8411    | intergenic  | CST1,XXyac-YX60D10.1    | + | protein_cod  | 14357;32516   |
| 387 | chr20 | 23683639  | + | chr20 | 23746169  | + | Y | Y | N | Y | Y | del | na | alt-EJ | intergenic  | CST4,CST2P1          | - | protein_cod  | 13962;8318    | intergenic  | CST1,XXyac-YX60D10.1    | + | protein_cod  | 14264;32609   |
| 388 | chr20 | 23699497  | + | chr20 | 23774962  | + | N | Y | N | N | N | del | na | alt-EJ | intergenic  | CST2P1,CST1          | - | pseudogene   | 7454;28693    | intergenic  | CST1,XXyac-YX60D10.1    | + | protein_cod  | 43057;3816    |
| 389 | chr20 | 24903698  | + | chr20 | 24904417  | + | Y | Y | N | Y | Y | del | na | alt-EJ | intergenic  | RP5-860P4.2,CST7     | + | lincRNA,pro  | 242071;26168  | intergenic  | RP5-860P4.2,CST7        | + | lincRNA,pro  | 242790;25449  |
| 390 | chr20 | 26092751  | + | chr20 | 26094316  | + | Y | Y | Y | Y | Y | del | na | NHEJ   | ncRNA_intrn | NCOR1P1              | - | pseudogene   |               |             |                         |   |              |               |

|     |       |           |   |       |           |   |   |   |   |   |   |     |    |        |                  |                     |     |              |               |                  |                       |     |              |               |
|-----|-------|-----------|---|-------|-----------|---|---|---|---|---|---|-----|----|--------|------------------|---------------------|-----|--------------|---------------|------------------|-----------------------|-----|--------------|---------------|
| 415 | chr21 | 44504856  | + | chr21 | 44508509  | + | N | N | Y | Y | Y | del | na | alt-EJ | intergenic       | CBS,U2AF1           | -,- | protein_cod  | 7803;8210     | intergenic       | CBS,U2AF1             | -,- | protein_cod  | 11456;4557    |
| 416 | chr21 | 44970366  | + | chr21 | 44973303  | + | Y | Y | Y | Y | Y | del | na | alt-EJ | intronic         | HSF2BP              | -   | protein_cod  | 0             | intronic         | HSF2BP                | -   | protein_cod  | 0             |
| 417 | chr21 | 47801910  | + | chr21 | 47804106  | + | N | N | Y | N | N | del | na | alt-EJ | intronic         | PCNT                | +   | protein_cod  | 0             | intronic         | PCNT                  | +   | protein_cod  | 0             |
| 418 | chr21 | 47801914  | + | chr21 | 47804583  | + | Y | N | N | N | N | del | na | alt-EJ | intronic         | PCNT                | +   | protein_cod  | 0             | intronic         | PCNT                  | +   | protein_cod  | 0             |
| 419 | chr21 | 47802471  | + | chr21 | 47804700  | + | N | N | N | Y | N | del | na | alt-EJ | intronic         | PCNT                | +   | protein_cod  | 0             | intronic         | PCNT                  | +   | protein_cod  | 0             |
| 420 | chr22 | 18025623  | + | chr22 | 18026958  | + | N | Y | Y | Y | Y | del | na | alt-EJ | intronic         | CECR2               | +   | protein_cod  | 0             | intronic         | CECR2                 | +   | protein_cod  | 0             |
| 421 | chr22 | 22520386  | + | chr22 | 22752586  | + | N | N | N | N | Y | del | na | alt-EJ | intergenic       | IGLV4-60,LL22NC03-3 | +,+ | IG_V_gene,   | 3312;2296     | upstream;dr      | IGLVII-41-1,IGLV-42   | +,+ | IG_V_pseu    | 0             |
| 422 | chr22 | 22520494  | + | chr22 | 22752604  | + | N | Y | Y | Y | Y | del | na | alt-EJ | intergenic       | IGLV4-60,LL22NC03-3 | +,+ | IG_V_gene,   | 3420;2188     | upstream;dr      | IGLVII-41-1,IGLV-42   | +,+ | IG_V_pseu    | 0             |
| 423 | chr22 | 24271413  | + | chr22 | 24311299  | + | Y | Y | Y | Y | Y | del | na | alt-EJ | intergenic       | AP000350.6,AP000350 | +,+ | pseudogene   | 2382;8042     | intronic         | DDTL                  | +   | protein_cod  | 0             |
| 424 | chr22 | 25692203  | + | chr22 | 25988820  | + | N | N | N | Y | N | del | na | alt-EJ | intergenic       | RP3-462D8.2,IGLL3P  | -,+ | lincRNA,pse  | 13562;22020   | intronic         | ADRBK2                | +   | protein_cod  | 0             |
| 425 | chr22 | 25692330  | + | chr22 | 25988857  | + | Y | N | Y | Y | N | del | na | alt-EJ | intergenic       | RP3-462D8.2,IGLL3P  | -,+ | lincRNA,pse  | 13689;21893   | intronic         | ADRBK2                | +   | protein_cod  | 0             |
| 426 | chr22 | 37143149  | + | chr22 | 37147876  | + | Y | Y | Y | Y | N | del | na | alt-EJ | intergenic       | RP1-293L6.1,IFT27   | -,+ | antisense,p  | 25632;11097   | intergenic       | RP1-293L6.1,IFT27     | -,+ | antisense,p  | 30359;6370    |
| 427 | chr22 | 37905658  | + | chr22 | 37906196  | + | Y | N | N | N | N | del | na | alt-EJ | intronic         | CARD10              | -   | protein_cod  | 0             | intronic         | CARD10                | -   | protein_cod  | 0             |
| 428 | chr22 | 37905692  | + | chr22 | 37906171  | + | N | Y | Y | Y | N | del | na | alt-EJ | intronic         | CARD10              | -   | protein_cod  | 0             | intronic         | CARD10                | -   | protein_cod  | 0             |
| 429 | chr22 | 39294106  | + | chr22 | 39298687  | + | Y | Y | Y | Y | Y | del | na | alt-EJ | intergenic       | CBX6,CTA-150C2.13   | -,+ | protein_cod  | 25787;23126   | intergenic       | CBX6,CTA-150C2.13     | -,+ | protein_cod  | 30368;18545   |
| 430 | chr22 | 39469325  | + | chr22 | 39469638  | + | N | N | Y | N | N | del | na | alt-EJ | intronic         | APOBEC3G            | +   | protein_cod  | 0             | intronic         | APOBEC3G              | +   | protein_cod  | 0             |
| 431 | chr22 | 43676811  | + | chr22 | 43677047  | + | Y | N | N | N | N | del | na | alt-EJ | ncRNA_intrn      | Z99756.1            | +   | antisense    | 0             | ncRNA_intrn      | Z99756.1              | +   | antisense    | 0             |
| 432 | chr22 | 44508567  | + | chr22 | 44511652  | + | N | N | N | N | Y | del | na | alt-EJ | intronic         | PARVB               | +   | protein_cod  | 0             | intronic         | PARVB                 | +   | protein_cod  | 0             |
| 433 | chr22 | 44509011  | + | chr22 | 44510114  | + | Y | N | N | N | N | del | na | alt-EJ | intronic         | PARVB               | +   | protein_cod  | 0             | intronic         | PARVB                 | +   | protein_cod  | 0             |
| 434 | chr22 | 45554719  | + | chr22 | 45557125  | + | N | Y | N | Y | Y | del | na | alt-EJ | ncRNA_intrn      | CTA-217C2.1         | -   | lincRNA      | 0             | ncRNA_intrn      | CTA-217C2.1           | -   | lincRNA      | 0             |
| 435 | chr22 | 45723922  | + | chr22 | 45724251  | + | Y | Y | Y | Y | Y | del | na | alt-EJ | exonic           | FAM118A             | +   | protein_cod  | 0             | intronic         | FAM118A               | +   | protein_cod  | 0             |
| 436 | chr22 | 49034177  | + | chr22 | 49034450  | + | N | N | N | N | Y | del | na | alt-EJ | intronic         | FAM19A5             | +   | protein_cod  | 0             | intronic;intrc   | FAM19A5               | +   | protein_cod  | 0             |
| 437 | chr22 | 50466975  | + | chr22 | 50467434  | + | N | Y | N | N | N | del | na | alt-EJ | intronic         | TTL8                | +   | protein_cod  | 0             | intronic         | TTL8                  | +   | protein_cod  | 0             |
| 438 | chr3  | 3481046   | + | chr3  | 3483342   | + | Y | Y | Y | Y | Y | del | na | alt-EJ | ncRNA_intrn      | AC026188.1          | -   | lincRNA      | 0             | ncRNA_intrn      | AC026188.1            | -   | lincRNA      | 0             |
| 439 | chr3  | 5155855   | + | chr3  | 5284212   | + | Y | N | N | N | N | del | na | alt-EJ | intergenic       | AC090955.5,ARL8B    | +,+ | pseudogene   | 14309;8050    | intergenic       | EDEM1,MIR4790         | -,+ | protein_cod  | 22570;7650    |
| 440 | chr3  | 6169030   | + | chr3  | 6187098   | + | N | N | N | Y | N | del | na | alt-EJ | intergenic;intrn | AC027119.1,AC026167 | +,+ | lincRNA,linc | 3223;21141    | intergenic;intrn | AC027119.1,AC026167.1 | +,+ | lincRNA,linc | 21291;3073    |
| 441 | chr3  | 8325638   | + | chr3  | 8326812   | + | Y | Y | Y | Y | Y | del | na | NHEJ   | ncRNA_intrn      | LMCD1-AS1           | -   | antisense    | 0             | ncRNA_intrn      | LMCD1-AS1             | -   | antisense    | 0             |
| 442 | chr3  | 8720104   | + | chr3  | 8721110   | + | N | Y | Y | N | N | del | na | alt-EJ | intronic         | SSUH2               | -   | protein_cod  | 0             | intronic         | SSUH2                 | -   | protein_cod  | 0             |
| 443 | chr3  | 8720256   | + | chr3  | 8720542   | + | N | Y | N | Y | N | del | na | alt-EJ | intronic         | SSUH2               | -   | protein_cod  | 0             | intronic         | SSUH2                 | -   | protein_cod  | 0             |
| 444 | chr3  | 8720287   | + | chr3  | 8720447   | + | Y | N | N | N | N | del | na | VNTR   | intronic         | SSUH2               | -   | protein_cod  | 0             | intronic         | SSUH2                 | -   | protein_cod  | 0             |
| 445 | chr3  | 13171015  | + | chr3  | 124808643 | + | N | N | N | Y | N | del | na | alt-EJ | intergenic       | IQSEC1,NUP210       | -,- | protein_cod  | 56398;186722  | intronic         | SLC12A8               | -   | protein_cod  | 0             |
| 446 | chr3  | 20653871  | + | chr3  | 20654261  | + | N | N | Y | N | N | del | na | NHEJ   | intergenic;intrn | RNU6-815PAC104441   | -   | snRNA,miR    | 104623;525884 | intergenic;intrn | RNU6-815PAC104441.1   | -,- | snRNA,miR    | 105013;525494 |
| 447 | chr3  | 21723705  | + | chr3  | 21725967  | + | N | Y | Y | N | N | del | na | NHEJ   | intronic;intrn   | ZNF385D             | -   | protein_cod  | 0             | intronic;intrn   | ZNF385D               | -   | protein_cod  | 0             |
| 448 | chr3  | 26450969  | + | chr3  | 26452299  | + | Y | Y | Y | Y | Y | del | na | NHEJ   | intergenic       | VENTXP4,AC099754    | -,+ | pseudogene   | 61840;209852  | intergenic       | VENTXP4,AC099754.1    | -,- | pseudogene   | 63170;208522  |
| 449 | chr3  | 32102051  | + | chr3  | 32107885  | + | Y | Y | Y | Y | Y | del | na | alt-EJ | intergenic       | Y_RNA,NIFKP7        | -,+ | misc_RNA,t   | 55446;3415    | ncRNA_intrn      | NIFKP7                | -,+ | pseudogene   | 0             |
| 450 | chr3  | 32201700  | + | chr3  | 32202164  | + | N | Y | N | N | N | del | na | VNTR   | intronic         | GPD1L               | +   | protein_cod  | 0             | intronic         | GPD1L                 | +   | protein_cod  | 0             |
| 451 | chr3  | 45609876  | + | chr3  | 45610277  | + | N | N | Y | N | N | del | na | alt-EJ | intergenic       | LARS2,AC099539.1    | +,+ | protein_cod  | 18963;23871   | intergenic       | LARS2,AC099539.1      | +,+ | protein_cod  | 19364;23470   |
| 452 | chr3  | 47490668  | + | chr3  | 47493442  | + | Y | Y | Y | Y | Y | del | na | alt-EJ | intronic         | SCAP                | +   | protein_cod  | 0             | intronic         | SCAP                  | +   | protein_cod  | 0             |
| 453 | chr3  | 48957790  | + | chr3  | 48958731  | + | N | N | N | Y | N | del | na | alt-EJ | intronic         | ARIH2               | +   | protein_cod  | 0             | intronic         | ARIH2                 | +   | protein_cod  | 0             |
| 454 | chr3  | 54241168  | + | chr3  | 54241557  | + | Y | Y | Y | Y | Y | del | na | NHEJ   | intronic         | CACNA2D3            | +   | protein_cod  | 0             | intronic         | CACNA2D3              | +   | protein_cod  | 0             |
| 455 | chr3  | 56604696  | + | chr3  | 56604956  | + | N | N | N | N | Y | del | na | NHEJ   | UTR3             | CDC66               | +   | protein_cod  | 0             | intronic         | CDC66                 | +   | protein_cod  | 0             |
| 456 | chr3  | 67493701  | + | chr3  | 67498066  | + | Y | Y | Y | Y | Y | del | na | alt-EJ | intronic         | SUCLG2              | +   | protein_cod  | 0             | intronic         | SUCLG2                | +   | protein_cod  | 0             |
| 457 | chr3  | 68634771  | + | chr3  | 68640255  | + | N | Y | Y | Y | Y | del | na | alt-EJ | intergenic       | FAM19A1,RP11-436J2  | -,+ | protein_cod  | 39995;48086   | intergenic       | FAM19A1,RP11-436J20   | -,+ | protein_cod  | 45479;42602   |
| 458 | chr3  | 68739682  | + | chr3  | 68747859  | + | Y | Y | Y | Y | Y | del | na | NHEJ   | intergenic       | PSMC1P1,FAM19A4     | -,+ | pseudogene   | 53507;41235   | intergenic       | PSMC1P1,FAM19A4       | -,+ | pseudogene   | 61684;33058   |
| 459 | chr3  | 69179673  | + | chr3  | 69181542  | + | N | Y | Y | Y | Y | del | na | NHEJ   | intergenic       | LMOD3,FRMD4B        | -,+ | protein_cod  | 7490;39468    | intergenic       | LMOD3,FRMD4B          | -,+ | protein_cod  | 9359;37599    |
| 460 | chr3  | 75276885  | + | chr3  | 75278914  | + | Y | Y | Y | Y | Y | del | na | alt-EJ | intergenic       | HNRNP3A6,MYLK1P     | -,+ | pseudogene   | 12098;100815  | intergenic       | HNRNP3A6,MYLK1P       | -,+ | pseudogene   | 14127;98786   |
| 461 | chr3  | 80062738  | + | chr3  | 80063977  | + | Y | N | N | N | N | del | na | alt-EJ | intergenic       | HMGB1P38,OSBPL9P    | -,+ | pseudogene   | 55446;149739  | intergenic       | HMGB1P38,OSBPL9P      | -,+ | pseudogene   | 56685;148500  |
| 462 | chr3  | 80062780  | + | chr3  | 80064368  | + | N | N | Y | N | N | del | na | alt-EJ | intergenic       | HMGB1P38,OSBPL9P    | -,+ | pseudogene   | 55448;149697  | intergenic       | HMGB1P38,OSBPL9P      | -,+ | pseudogene   | 57076;148109  |
| 463 | chr3  | 80062834  | + | chr3  | 80063968  | + | N | Y | N | N | Y | del | na | alt-EJ | intergenic;intrn | HMGB1P38,OSBPL9P    | -,+ | pseudogene   | 55542;149643  | intergenic       | HMGB1P38,OSBPL9P      | -,+ | pseudogene   | 56676;148509  |
| 464 | chr3  | 80062834  | + | chr3  | 80064088  | + | N | Y | Y | N | N | del | na | alt-EJ | intergenic;intrn | HMGB1P38,OSBPL9P    | -,+ | pseudogene   | 55542;149643  | intergenic       | HMGB1P38,OSBPL9P      | -,+ | pseudogene   | 56796;148389  |
| 465 | chr3  | 84104942  | + | chr3  | 84107385  | + | Y | Y | Y | Y | Y | del | na | NHEJ   | intergenic       | SRRM1P2,AC108696    | -,+ | pseudogene   | 117555;234321 | intergenic       | SRRM1P2,AC108696.1    | -,+ | pseudogene   | 119998;231878 |
| 466 | chr3  | 86394262  | + | chr3  | 86430244  | + | N | Y | Y | Y | Y | del | na | alt-EJ | intergenic       | RP11-789F5.1,RN7SK  | +,+ | lincRNA,mis  | 77751;17020   | intergenic       | RN7SKP284,RP11-331K   | +,+ | misc_RNA,l   | 18620;100849  |
| 467 | chr3  | 98136828  | + | chr3  | 98138387  | + | N | N | Y | Y | Y | del | na | NHEJ   | ncRNA_intrn      | RP11-325B23.2       | +   | lincRNA      | 0             | ncRNA_intrn      | RP11-325B23.2         | +   | lincRNA      | 0             |
| 468 | chr3  | 98899061  | + | chr3  | 98902391  | + | Y | Y | Y | Y | Y | del | na | alt-EJ | intergenic       | CTD-2021J15.1,ACTG  | -,+ | antisense,p  | 161655;35007  | intergenic       | CTD-2021J15.1,ACTG1F  | -,+ | antisense,p  | 164985;31677  |
| 469 | chr3  | 99626782  | + | chr3  | 99629632  | + | N | Y | Y | N | N | del | na | alt-EJ | intronic;intrn   | FILIP1L,CMSS1       | -,+ | protein_cod  | 0             | intronic;intrn   | FILIP1L,CMSS1         | -,+ | protein_cod  | 0             |
| 470 | chr3  | 100521629 | + | chr3  | 100522508 | + | Y | Y | Y | Y | Y | del | na | NHEJ   | intronic         | ABI3BP              | -   | protein_cod  | 0             | intronic         | ABI3BP                | -   | protein_cod  | 0             |
| 471 | chr3  | 107037955 | + | chr3  | 107040334 | + | Y | Y | Y | Y | Y | del | na | alt-EJ | ncRNA_intrn      | RP11-446H18.5,LINC0 | -,+ | lincRNA,linc | 0             | ncRNA_intrn      | RP11-446H18.5,LINC006 | -,+ | lincRNA,linc | 0             |
| 472 | chr3  | 109103301 | + | chr3  | 109104948 | + | Y | Y | Y | Y | Y | del | na | alt-EJ | intergenic       | RP11-397K18.1,RP11- | -,+ | pseudogene   | 20220;12162   | intergenic       | RP11-397K18.1,RP11-70 | -,+ | pseudogene   | 21867;10515   |
| 473 | chr3  | 118155992 | + | chr3  | 118156541 | + | Y | Y | Y | Y | Y | del | na | alt-EJ | ncRNA_intrn      | RP11-384F7.1        | -   | lincRNA      | 0             | ncRNA_intrn      | RP11-384F7.1          | -   | lincRNA      | 0             |
| 474 | chr3  | 119893984 | + | chr3  | 119894445 | + | Y | Y | Y | Y | Y | del | na | alt-EJ | intronic         | GPR156              | -   | protein_cod  | 0             | intronic         | GPR156                | -   | protein_cod  | 0             |
| 475 | chr3  | 124936295 | + | chr3  | 124937164 | + | Y | Y | Y | Y | Y | del | na | NHEJ   | intronic         | SLC12A8             | -   | protein_cod  | 0             | intronic         | SLC12A8               | -   | protein_cod  | 0             |
| 476 | chr3  | 129763381 | + | chr3  | 129806747 | + | Y | N | N | Y | Y | del | na | alt-EJ | intergenic       | OR7E21P,RP11-77P1E  | -,- | pseudogene   | 8999;11186    | ncRNA_intrn      | ALG1L2                | +   | pseudogene   | 0             |
| 477 | chr3  | 129763552 | + | chr3  | 129806252 |   |   |   |   |   |   |     |    |        |                  |                     |     |              |               |                  |                       |     |              |               |

|     |      |           |   |      |           |   |   |   |   |   |   |   |     |    |             |                          |                       |            |               |                          |                        |                       |              |               |               |
|-----|------|-----------|---|------|-----------|---|---|---|---|---|---|---|-----|----|-------------|--------------------------|-----------------------|------------|---------------|--------------------------|------------------------|-----------------------|--------------|---------------|---------------|
| 499 | chr4 | 86050     | + | chr4 | 367236    | + | N | N | N | N | N | Y | del | na | alt-EJ      | ncRNA_exoZ95704.2        | +                     | pseudogene | 0             | exonic                   | ZNF141                 | +                     | protein_cod  | 0             |               |
| 500 | chr4 | 86250     | + | chr4 | 367298    | + | N | N | N | N | N | N | del | na | alt-EJ      | ncRNA_exoZ95704.2        | +                     | pseudogene | 0             | exonic                   | ZNF141                 | +                     | protein_cod  | 0             |               |
| 501 | chr4 | 3613374   | + | chr4 | 3618620   | + | Y | Y | Y | Y | Y | Y | del | na | alt-EJ      | intergenic               | LINC00955,RP3-368B1   | +,+        | protein_cod   | 21643;21382              | intergenic             | LINC00955,RP3-368B9.2 | +,+          | protein_cod   | 26889;16136   |
| 502 | chr4 | 6682394   | + | chr4 | 6685863   | + | Y | Y | Y | Y | Y | Y | del | na | alt-EJ      | intergenic               | AC093323.3,RP11-539L  | +,+        | lincRNA,inc   | 4620;6781                | intergenic             | AC093323.3,RP11-539L1 | +,+          | lincRNA,inc   | 8089;3312     |
| 503 | chr4 | 7635511   | + | chr4 | 7635853   | + | N | N | N | N | N | Y | del | na | NHEJ        | intronic                 | SORCS2                | +          | protein_cod   | 0                        | intronic               | SORCS2                | +            | protein_cod   | 0             |
| 504 | chr4 | 9492589   | + | chr4 | 9495006   | + | N | N | N | N | N | N | del | na | alt-EJ      | intergenic               | OR7E85P,UNC93B7       | +,+        | pseudogene    | 6240;2791                | upstream               | UNC93B7               | +            | pseudogene    | 0             |
| 505 | chr4 | 9576977   | + | chr4 | 9577449   | + | Y | Y | Y | Y | Y | Y | del | na | NHEJ        | intergenic               | RP11-1396O13.2,RP11-1 | +,+        | pseudogene    | 11407;8589               | intergenic             | RP11-1396O13.2,RP11-2 | +,+          | pseudogene    | 11879;8117    |
| 506 | chr4 | 10211263  | + | chr4 | 10234571  | + | Y | Y | Y | Y | Y | Y | del | na | alt-EJ      | intergenic               | AC006499.6,AC006499.5 | +,+        | pseudogene    | 8967;28574               | intergenic             | AC006499.6,AC006499.5 | +,+          | pseudogene    | 32275;5266    |
| 507 | chr4 | 19057471  | + | chr4 | 19057970  | + | N | N | N | N | N | Y | del | na | alt-EJ      | intergenic               | RP11-608B3.1,RP11-3   | +,+        | lincRNA,inc   | 566340;116487            | intergenic             | RP11-608B3.1,RP11-3J1 | +,+          | lincRNA,inc   | 566839;115988 |
| 508 | chr4 | 28421590  | + | chr4 | 28421941  | + | Y | Y | Y | Y | Y | Y | del | na | NHEJ        | intergenic               | RP11-180C1.1,RP11-1   | +,+        | protein_cod   | 17104;15481              | intergenic             | RP11-180C1.1,RP11-123 | +,+          | protein_cod   | 17455;15130   |
| 509 | chr4 | 32071041  | + | chr4 | 32074611  | + | N | N | N | N | N | N | del | na | TE1_complex | ncRNA_intrnRP11-734118.1 | +                     | lincRNA    | 0             | ncRNA_intrnRP11-734118.1 | +                      | lincRNA               | 0            |               |               |
| 510 | chr4 | 40296719  | + | chr4 | 40297192  | + | N | N | N | N | N | N | del | na | alt-EJ      | intergenic               | RP11-395I6.2,AC195454 | +,+        | lincRNA,inc   | 28642;21783              | intergenic             | RP11-395I6.2,AC195454 | +,+          | lincRNA,inc   | 29115;21310   |
| 511 | chr4 | 42905165  | + | chr4 | 42905854  | + | Y | Y | Y | Y | Y | Y | del | na | NHEJ        | intronic                 | GRXCR1                | +          | protein_cod   | 0                        | intronic               | GRXCR1                | +            | protein_cod   | 0             |
| 512 | chr4 | 43931495  | + | chr4 | 43931837  | + | N | Y | Y | N | Y | Y | del | na | NHEJ        | intergenic               | RP11-663P9.2,RP11-6   | +,+        | pseudogene    | 30127;50528              | intergenic             | RP11-663P9.2,RP11-663 | +,+          | pseudogene    | 30469;50186   |
| 513 | chr4 | 48661407  | + | chr4 | 48661615  | + | N | N | Y | N | N | N | del | na | alt-EJ      | intronic                 | FRYL                  | +          | protein_cod   | 0                        | intronic               | FRYL                  | +            | protein_cod   | 0             |
| 514 | chr4 | 48661490  | + | chr4 | 48661962  | + | N | Y | N | Y | N | N | del | na | alt-EJ      | intronic                 | FRYL                  | +          | protein_cod   | 0                        | intronic               | FRYL                  | +            | protein_cod   | 0             |
| 515 | chr4 | 49639241  | + | chr4 | 49648129  | + | N | N | Y | N | N | N | del | na | alt-EJ      | intergenic               | AC119751.4,NONE       | -,NONE     | miRNA,NOI     | 37715;NONE               | intergenic             | AC119751.4,NONE       | -,NONE       | miRNA,NOI     | 46603;NONE    |
| 516 | chr4 | 58252073  | + | chr4 | 58262328  | + | Y | N | N | Y | N | N | del | na | alt-EJ      | intergenic               | RPS26P24,RP11-319E    | +,+        | pseudogene    | 32578;39965              | intergenic             | RPS26P24,RP11-319E1   | +,+          | pseudogene    | 42833;29710   |
| 517 | chr4 | 65097099  | + | chr4 | 65097834  | + | Y | N | Y | Y | Y | Y | del | na | NHEJ        | intergenic               | RP11-12K22.1,TECRL    | +,+        | lincRNA,prc   | 10793;43876              | intergenic             | RP11-12K22.1,TECRL    | +,+          | lincRNA,prc   | 373838;43141  |
| 518 | chr4 | 73831248  | + | chr4 | 73831821  | + | Y | Y | Y | Y | Y | Y | del | na | NHEJ        | downstream               | RNU4ATAC9P            | +          | snRNA         | 0                        | downstream             | RNU4ATAC9P            | +            | snRNA         | 0             |
| 519 | chr4 | 79480007  | + | chr4 | 79481319  | + | Y | Y | Y | Y | Y | Y | del | na | alt-EJ      | intronic                 | ANXA3                 | +          | protein_cod   | 0                        | intronic               | ANXA3                 | +            | protein_cod   | 0             |
| 520 | chr4 | 91931556  | + | chr4 | 91935837  | + | Y | Y | Y | Y | Y | Y | del | na | NHEJ        | intronic                 | CCSER1                | +          | protein_cod   | 0                        | intronic               | CCSER1                | +            | protein_cod   | 0             |
| 521 | chr4 | 106623778 | + | chr4 | 10669929  | + | Y | Y | Y | Y | Y | Y | del | na | NHEJ        | intronic                 | INTS12                | +          | protein_cod   | 0                        | ncRNA_intrnRP11-45L9.1 | +                     | antisense    | 0             |               |
| 522 | chr4 | 106940468 | + | chr4 | 106943267 | + | Y | Y | Y | Y | Y | Y | del | na | alt-EJ      | ncRNA_intrnRP11-710F7.3  | +                     | antisense  | 0             | ncRNA_exoRP11-710F7.3    | +                      | antisense             | 0            |               |               |
| 523 | chr4 | 113985910 | + | chr4 | 113986373 | + | Y | Y | Y | Y | Y | Y | del | na | alt-EJ      | ncRNA_intrnRP11-650J17.1 | +                     | antisense  | 0             | ncRNA_intrnRP11-650J17.1 | +                      | antisense             | 0            |               |               |
| 524 | chr4 | 114135100 | + | chr4 | 114135586 | + | Y | Y | Y | Y | Y | Y | del | na | alt-EJ      | intronic                 | ANK2                  | +          | protein_cod   | 0                        | ncRNA_spliAC004057.1   | +                     | pseudogene   | 0             |               |
| 525 | chr4 | 115175126 | + | chr4 | 115183837 | + | Y | Y | Y | N | N | N | del | na | alt-EJ      | intergenic               | RP11-362M19.1,UGT8    | +,+        | pseudogene    | 149745;344485            | intergenic             | RP11-362M19.1,UGT8    | +,+          | pseudogene    | 158456;335774 |
| 526 | chr4 | 122282250 | + | chr4 | 122289953 | + | Y | Y | Y | N | Y | Y | del | na | alt-EJ      | intronic                 | QRFP                  | +          | protein_cod   | 0                        | intronic               | QRFP                  | +            | protein_cod   | 0             |
| 527 | chr4 | 122282250 | + | chr4 | 122282051 | + | N | N | N | Y | N | N | del | na | alt-EJ      | intronic                 | QRFP                  | +          | protein_cod   | 0                        | intronic               | QRFP                  | +            | protein_cod   | 0             |
| 528 | chr4 | 128752673 | + | chr4 | 128753245 | + | Y | Y | Y | Y | Y | Y | del | na | alt-EJ      | intronic                 | HSPA4L                | +          | protein_cod   | 0                        | intronic               | HSPA4L                | +            | protein_cod   | 0             |
| 529 | chr4 | 134132685 | + | chr4 | 134132823 | + | N | N | Y | N | N | N | del | na | alt-EJ      | intergenic               | PCDH10,AC105252.1     | +,+        | protein_cod   | 16920;349326             | intergenic             | PCDH10,AC105252.1     | +,+          | protein_cod   | 17058;349188  |
| 530 | chr4 | 134132690 | + | chr4 | 134133130 | + | N | N | N | Y | N | N | del | na | alt-EJ      | intergenic               | PCDH10,AC105252.1     | +,+        | protein_cod   | 16925;349321             | intergenic             | PCDH10,AC105252.1     | +,+          | protein_cod   | 17365;348881  |
| 531 | chr4 | 138667026 | + | chr4 | 138667828 | + | Y | Y | Y | Y | Y | Y | del | na | NHEJ        | intergenic               | RP13-884E18.4,RP11-79 | +,+        | lincRNA,inc   | 10895;61834              | intergenic             | RP13-884E18.4,RP11-79 | +,+          | lincRNA,inc   | 11697;61032   |
| 532 | chr4 | 145316446 | + | chr4 | 145319907 | + | Y | Y | Y | Y | Y | Y | del | na | alt-EJ      | intergenic               | GYP4,RP11-361D14.2    | +,+        | protein_cod   | 254542;110606            | intergenic             | GYP4,RP11-361D14.2    | +,+          | protein_cod   | 258003;107145 |
| 533 | chr4 | 149990580 | + | chr4 | 149992580 | + | Y | Y | Y | N | N | N | del | na | alt-EJ      | intergenic               | RP11-563M4.1,RP11-342 | +,+        | lincRNA,inc   | 6906;78374               | intergenic             | RP11-563M4.1,RP11-342 | +,+          | lincRNA,inc   | 8906;76374    |
| 534 | chr4 | 169619457 | + | chr4 | 169621230 | + | N | Y | Y | Y | Y | Y | del | na | alt-EJ      | intronic                 | PALLD                 | +          | protein_cod   | 0                        | exonic                 | PALLD                 | +            | protein_cod   | 0             |
| 535 | chr4 | 170278462 | + | chr4 | 170278884 | + | Y | N | Y | Y | N | N | del | na | alt-EJ      | intergenic               | SH3RF1,NEK1           | +,+        | protein_cod   | 86206;35964              | intergenic             | SH3RF1,NEK1           | +,+          | protein_cod   | 86628;35542   |
| 536 | chr4 | 172374411 | + | chr4 | 172379426 | + | Y | Y | Y | Y | Y | Y | del | na | NHEJ        | intergenic               | RP11-717H13.1,RP11-97 | +,+        | lincRNA,inc   | 154993;99740             | intergenic             | RP11-717H13.1,RP11-97 | +,+          | lincRNA,inc   | 160008;94725  |
| 537 | chr4 | 175625167 | + | chr4 | 175626972 | + | Y | Y | Y | Y | Y | Y | del | na | alt-EJ      | intronic                 | GLRA3                 | +          | protein_cod   | 0                        | intronic               | GLRA3                 | +            | protein_cod   | 0             |
| 538 | chr4 | 176689450 | + | chr4 | 176689972 | + | N | N | N | Y | N | Y | del | na | alt-EJ      | intronic                 | GPM6A                 | +          | protein_cod   | 0                        | intronic               | GPM6A                 | +            | protein_cod   | 0             |
| 539 | chr4 | 180063818 | + | chr4 | 180064162 | + | Y | Y | Y | N | N | N | del | na | alt-EJ      | intergenic               | RP11-296L20.1,RP11-40 | +,+        | pseudogene    | 73070;246470             | intergenic             | RP11-296L20.1,RP11-40 | +,+          | pseudogene    | 73414;246126  |
| 540 | chr4 | 180097876 | + | chr4 | 180098508 | + | Y | Y | Y | Y | Y | Y | del | na | NHEJ        | intergenic               | RP11-296L20.1,RP11-40 | +,+        | pseudogene    | 107128;212412            | intergenic             | RP11-296L20.1,RP11-40 | +,+          | pseudogene    | 107760;211780 |
| 541 | chr4 | 182056560 | + | chr4 | 182057131 | + | Y | Y | Y | Y | Y | Y | del | na | alt-EJ      | ncRNA_intrnLINC00290     | +                     | lincRNA    | 0             | ncRNA_intrnLINC00290     | +                      | lincRNA               | 0            |               |               |
| 542 | chr4 | 186441636 | + | chr4 | 186444075 | + | Y | Y | Y | Y | Y | Y | del | na | alt-EJ      | intronic                 | PDLIM3                | +          | protein_cod   | 0                        | intronic               | PDLIM3                | +            | protein_cod   | 0             |
| 543 | chr4 | 189137172 | + | chr4 | 189137433 | + | N | Y | N | N | N | N | del | na | VNTR        | intergenic               | RP11-366H4.1,RP11-219 | +,+        | lincRNA,psf   | 54879;133358             | intergenic             | RP11-366H4.1,RP11-219 | +,+          | lincRNA,psf   | 55140;133097  |
| 544 | chr4 | 190191601 | + | chr4 | 190200464 | + | Y | Y | Y | Y | Y | Y | del | na | alt-EJ      | intergenic               | RP11-706F1.1,RP11-7   | +,+        | lincRNA,inc   | 65570;18230              | intergenic             | RP11-706F1.1,RP11-706 | +,+          | lincRNA,inc   | 74433;9367    |
| 545 | chr4 | 190572699 | + | chr4 | 190573534 | + | N | N | Y | N | N | N | del | na | alt-EJ      | intergenic               | HSP90AA4P,RP11-462    | +,+        | pseudogene    | 176353;8060              | intergenic             | HSP90AA4P,RP11-462G   | +,+          | pseudogene    | 177188;7225   |
| 546 | chr4 | 190573132 | + | chr4 | 190573426 | + | N | N | N | N | N | Y | del | na | alt-EJ      | intergenic               | HSP90AA4P,RP11-462    | +,+        | pseudogene    | 176786;7627              | intergenic             | HSP90AA4P,RP11-462G   | +,+          | pseudogene    | 177080;7333   |
| 547 | chr4 | 190606114 | + | chr4 | 190610285 | + | N | N | N | N | N | Y | del | na | alt-EJ      | intergenic               | RP11-462G22.1,RP11-46 | +,+        | lincRNA,inc   | 23474;18921              | intergenic             | RP11-462G22.1,RP11-46 | +,+          | lincRNA,inc   | 27645;14750   |
| 548 | chr4 | 190606817 | + | chr4 | 190610094 | + | N | N | N | Y | N | N | del | na | alt-EJ      | intergenic               | RP11-462G22.1,RP11-46 | +,+        | lincRNA,inc   | 24717;18218              | intergenic             | RP11-462G22.1,RP11-46 | +,+          | lincRNA,inc   | 27454;14941   |
| 549 | chr4 | 190657074 | + | chr4 | 190657554 | + | N | N | N | N | Y | N | del | na | alt-EJ      | intergenic               | RNU1-51P,AF146191.4   | +,+        | snRNA,incf    | 26206;44416              | intergenic             | RNU1-51P,AF146191.4   | +,+          | snRNA,incf    | 26686;43936   |
| 550 | chr4 | 190662931 | + | chr4 | 190663727 | + | Y | Y | Y | Y | Y | Y | del | na | NHEJ        | intergenic               | RNU1-51P,AF146191.4   | +,+        | snRNA,incf    | 32063;38559              | intergenic             | RNU1-51P,AF146191.4   | +,+          | snRNA,incf    | 32859;37763   |
| 551 | chr5 | 282677    | + | chr5 | 282820    | + | N | N | Y | N | N | N | del | na | alt-EJ      | intronic                 | PDCD6                 | +          | protein_cod   | 0                        | intronic               | PDCD6                 | +            | protein_cod   | 0             |
| 552 | chr5 | 650483    | + | chr5 | 650885    | + | N | N | N | Y | N | N | del | na | alt-EJ      | intronic                 | CEP72                 | +          | protein_cod   | 0                        | intronic               | CEP72                 | +            | protein_cod   | 0             |
| 553 | chr5 | 712047    | + | chr5 | 796171    | + | N | N | N | Y | N | N | del | na | alt-EJ      | UTR3                     | ZDHHC11B              | +          | protein_cod   | 0                        | UTR3                   | ZDHHC11               | +            | protein_cod   | 0             |
| 554 | chr5 | 1178293   | + | chr5 | 1180733   | + | Y | Y | Y | Y | Y | Y | del | na | NHEJ        | ncRNA_intrnCTD-3080P12.3 | +,+                   | antisense  | 0             | intergenic               | CTD-3080P12.3,SLC6A1   | +,+                   | antisense,pi | 2013;20977    |               |
| 555 | chr5 | 1924590   | + | chr5 | 1925203   | + | Y | Y | Y | Y | Y | Y | del | na | NHEJ        | intergenic               | CTD-2194D22.4,RP11-2  | +,+        | antisense,lir | 23983;9387               | intergenic             | CTD-2194D22.4,RP11-2  | +,+          | antisense,lir | 24596;8774    |
| 556 | chr5 | 10756181  | + | chr5 | 10756517  | + | N | N | Y | Y | Y | Y | del | na | alt-EJ      | intronic                 | DAP                   | +          | protein_cod   | 0                        | intronic               | DAP                   | +            | protein_cod   | 0             |
| 557 | chr5 | 11817047  | + | chr5 | 11817600  | + | Y |   |   |   |   |   |     |    |             |                          |                       |            |               |                          |                        |                       |              |               |               |

|     |      |           |   |      |           |   |   |   |   |   |   |   |     |    |            |                  |                       |     |              |               |                  |                       |     |              |               |
|-----|------|-----------|---|------|-----------|---|---|---|---|---|---|---|-----|----|------------|------------------|-----------------------|-----|--------------|---------------|------------------|-----------------------|-----|--------------|---------------|
| 583 | chr5 | 127336000 | + | chr5 | 127336932 | + | Y | Y | Y | N | Y | Y | del | na | alt-EJ     | ncRNA_intr       | CTC-228N24.3          | -   | lincRNA      | 0             | ncRNA_intr       | CTC-228N24.3          | -   | lincRNA      | 0             |
| 584 | chr5 | 133134678 | + | chr5 | 133136489 | + | N | Y | Y | N | N | N | del | na | alt-EJ     | intergenic       | AC005178.1,snoU13     | -,- | pseudogene   | 79864;50059   | intergenic       | AC005178.1,snoU13     | -,- | pseudogene   | 79864;50059   |
| 585 | chr5 | 136854681 | + | chr5 | 136856398 | + | Y | Y | Y | Y | Y | Y | del | na | alt-EJ     | intergenic       | SPOCK1,AC106775.1     | -,- | protein_cod  | 21361;12745   | intergenic       | SPOCK1,AC106775.1     | -,- | protein_cod  | 21361;12745   |
| 586 | chr5 | 138734512 | + | chr5 | 138734762 | + | Y | N | N | N | N | N | del | na | alt-EJ     | intronic         | SPATA24               | -   | protein_cod  | 0             | intronic         | SPATA24               | -   | protein_cod  | 0             |
| 587 | chr5 | 141459200 | + | chr5 | 141459506 | + | Y | N | N | N | N | Y | del | na | NHEJ       | intergenic       | AC005740.4,NDIFP1     | -,- | pseudogene   | 42816;28564   | intergenic       | AC005740.4,NDIFP1     | -,- | pseudogene   | 42816;28564   |
| 588 | chr5 | 150177661 | + | chr5 | 150181600 | + | Y | Y | Y | Y | Y | Y | del | na | NHEJ       | intergenic       | AC010441.1,IRGM       | +,+ | protein_cod  | 5303;44485    | intergenic       | AC010441.1,IRGM       | +,+ | protein_cod  | 5303;44485    |
| 589 | chr5 | 152684103 | + | chr5 | 152692358 | + | N | N | Y | Y | N | N | del | na | alt-EJ     | intergenic       | AC091969.1,GRIA1      | -,- | lincRNA_prc  | 89255;177748  | intergenic       | AC091969.1,GRIA1      | -,- | lincRNA_prc  | 89255;177748  |
| 590 | chr5 | 155311786 | + | chr5 | 155312578 | + | Y | Y | Y | Y | Y | Y | del | na | alt-EJ     | intronic         | SGCD                  | +   | protein_cod  | 0             | intronic         | SGCD                  | +   | protein_cod  | 0             |
| 591 | chr5 | 162462399 | + | chr5 | 162462755 | + | N | N | N | N | Y | N | del | na | NHEJ       | ncRNA_intr       | RP11-541P9.3          | -   | antisense    | 0             | ncRNA_intr       | RP11-541P9.3          | -   | antisense    | 0             |
| 592 | chr6 | 857169    | + | chr6 | 857436    | + | Y | N | N | N | N | Y | del | na | NHEJ       | intergenic       | RP11-532F6.5,RP5-10   | +,+ | lincRNA,linc | 76788;48026   | intergenic       | RP11-532F6.5,RP5-1077 | +,+ | lincRNA,linc | 76788;48026   |
| 593 | chr6 | 1270713   | + | chr6 | 1270999   | + | N | Y | Y | N | N | N | del | na | NHEJ       | intergenic       | snoU13,FOXQ1          | +,+ | snoRNA,prc   | 84144;41676   | intergenic       | snoU13,FOXQ1          | +,+ | snoRNA,prc   | 84144;41676   |
| 594 | chr6 | 8666373   | + | chr6 | 8672863   | + | N | N | N | N | N | Y | del | na | NHEJ       | intergenic       | HULC,RP11-314C16.1    | +,+ | lincRNA,linc | 18784;111548  | intergenic       | HULC,RP11-314C16.1    | +,+ | lincRNA,linc | 18784;111548  |
| 595 | chr6 | 18402088  | + | chr6 | 18402869  | + | Y | Y | Y | Y | Y | Y | del | na | alt-EJ     | intronic         | RNF144B               | +   | protein_cod  | 0             | intronic         | RNF144B               | +   | protein_cod  | 0             |
| 596 | chr6 | 23743259  | + | chr6 | 23745946  | + | Y | Y | Y | Y | Y | Y | del | na | NHEJ       | intergenic       | RP4-810F7.1,SPTLC1    | +,+ | pseudogene   | 95944;110980  | intergenic       | RP4-810F7.1,SPTLC1P2  | +,+ | pseudogene   | 95944;110980  |
| 597 | chr6 | 24325363  | + | chr6 | 24327810  | + | Y | Y | Y | Y | Y | Y | del | na | alt-EJ     | intronic         | DCDC2                 | -   | protein_cod  | 0             | intronic         | DCDC2                 | -   | protein_cod  | 0             |
| 598 | chr6 | 34699920  | + | chr6 | 34701120  | + | Y | N | Y | N | N | Y | del | na | alt-EJ     | intergenic       | RP11-140K17.2,RP3-3   | +,+ | pseudogene   | 17403;10833   | intergenic       | RP11-140K17.2,RP3-375 | +,+ | pseudogene   | 17403;10833   |
| 599 | chr6 | 34700241  | + | chr6 | 34701125  | + | N | Y | N | Y | Y | N | del | na | alt-EJ     | intergenic       | RP11-140K17.2,RP3-3   | +,+ | pseudogene   | 17408;10828   | intergenic       | RP11-140K17.2,RP3-375 | +,+ | pseudogene   | 17408;10828   |
| 600 | chr6 | 48930945  | + | chr6 | 48938534  | + | Y | Y | Y | Y | Y | Y | del | na | NHEJ       | intergenic       | RP1-57E3.1,RP4-724F   | +,+ | pseudogene   | 18116;106815  | intergenic       | RP1-57E3.1,RP4-724F1  | +,+ | pseudogene   | 18116;106815  |
| 601 | chr6 | 51736110  | + | chr6 | 51736806  | + | Y | Y | Y | Y | Y | Y | del | na | alt-EJ     | intronic         | PKHD1                 | -   | protein_cod  | 0             | intronic         | PKHD1                 | -   | protein_cod  | 0             |
| 602 | chr6 | 52651128  | + | chr6 | 52652647  | + | Y | Y | N | N | N | Y | del | na | I_LTR_LTR1 | intergenic       | RP1-152L7.1,GSTA1     | -,- | pseudogene   | 9502;3815     | intergenic       | RP1-152L7.1,GSTA1     | -,- | pseudogene   | 9502;3815     |
| 603 | chr6 | 57297190  | + | chr6 | 57301247  | + | Y | Y | Y | Y | Y | Y | del | na | NHEJ       | intronic         | PRIM2                 | +   | protein_cod  | 0             | intronic         | PRIM2                 | +   | protein_cod  | 0             |
| 604 | chr6 | 57533116  | + | chr6 | 57534168  | + | N | N | Y | N | N | N | del | na | VNTR       | intergenic       | PRIM2,GAPDHP41        | +,+ | protein_cod  | 20793;152801  | intergenic       | PRIM2,GAPDHP41        | +,+ | protein_cod  | 20793;152801  |
| 605 | chr6 | 66111311  | + | chr6 | 66111704  | + | N | Y | N | N | Y | N | del | na | alt-EJ     | intronic         | EYS                   | -   | protein_cod  | 0             | intronic         | EYS                   | -   | protein_cod  | 0             |
| 606 | chr6 | 68101532  | + | chr6 | 68112168  | + | Y | Y | Y | Y | Y | Y | del | na | alt-EJ     | intergenic       | SNORD65,RP11-409K     | +,+ | snoRNA,psi   | 191795;54071  | intergenic       | SNORD65,RP11-409K15   | +,+ | snoRNA,psi   | 191795;54071  |
| 607 | chr6 | 74592061  | + | chr6 | 74602441  | + | Y | Y | Y | Y | Y | Y | del | na | alt-EJ     | intergenic       | CD109,TXNP7           | +,+ | protein_cod  | 64401;111795  | intergenic       | CD109,TXNP7           | +,+ | protein_cod  | 64401;111795  |
| 608 | chr6 | 77097494  | + | chr6 | 77102644  | + | Y | Y | Y | Y | Y | Y | del | na | alt-EJ     | intergenic       | RNU6-248P,RNU6-261    | +,+ | snRNA,snR    | 299987;54061  | intergenic       | RNU6-248P,RNU6-261P   | +,+ | snRNA,snR    | 299987;54061  |
| 609 | chr6 | 81283718  | + | chr6 | 81293578  | + | Y | Y | Y | Y | Y | Y | del | na | NHEJ       | intergenic       | RP11-486E2.1,FAM46A   | +,+ | pseudogene   | 26672;907578  | intergenic       | RP11-486E2.1,FAM46A   | +,+ | pseudogene   | 26672;907578  |
| 610 | chr6 | 92807965  | + | chr6 | 92808366  | + | Y | N | N | N | N | N | del | na | alt-EJ     | intergenic       | RPL5P19,U3            | +,+ | pseudogene   | 83914;20874   | intergenic       | RPL5P19,U3            | +,+ | pseudogene   | 83914;20874   |
| 611 | chr6 | 93706456  | + | chr6 | 93704326  | + | N | N | N | N | Y | N | del | na | alt-EJ     | intergenic       | ATF1P1,RP1-23E21.2    | +,+ | pseudogene   | 144966;36840  | intergenic       | ATF1P1,RP1-23E21.2    | +,+ | pseudogene   | 144966;36840  |
| 612 | chr6 | 93706892  | + | chr6 | 93743870  | + | N | N | N | Y | N | N | del | na | alt-EJ     | intergenic       | ATF1P1,RP1-23E21.2    | +,+ | pseudogene   | 145571;36235  | intergenic       | ATF1P1,RP1-23E21.2    | +,+ | pseudogene   | 145571;36235  |
| 613 | chr6 | 98595583  | + | chr6 | 98598034  | + | Y | N | Y | Y | Y | Y | del | na | NHEJ       | ncRNA_intr       | RP11-436D23.1         | -   | lincRNA      | 0             | ncRNA_intr       | RP11-436D23.1         | -   | lincRNA      | 0             |
| 614 | chr6 | 111071016 | + | chr6 | 111071570 | + | Y | N | Y | Y | Y | Y | del | na | NHEJ       | intronic         | CDK19                 | -   | protein_cod  | 0             | intronic         | CDK19                 | -   | protein_cod  | 0             |
| 615 | chr6 | 121797444 | + | chr6 | 121798056 | + | Y | Y | Y | Y | Y | Y | del | na | alt-EJ     | intergenic       | RNU4-35P,RP1-172I22   | +,+ | snRNA,psi    | 22789;1363    | intergenic       | RNU4-35P,RP1-172I22.1 | +,+ | snRNA,psi    | 22789;1363    |
| 616 | chr6 | 136582615 | + | chr6 | 136589600 | + | N | N | Y | N | N | N | del | na | NHEJ       | exonic;exon      | BCLAF1                | -   | protein_cod  | 0             | exonic           | BCLAF1                | -   | protein_cod  | 0             |
| 617 | chr6 | 136594326 | + | chr6 | 136596371 | + | N | N | N | Y | Y | N | del | na | alt-EJ     | splicing         | BCLAF1                | -   | protein_cod  | 0             | exonic           | BCLAF1                | -   | protein_cod  | 0             |
| 618 | chr6 | 136851675 | + | chr6 | 136852924 | + | Y | Y | Y | Y | Y | Y | del | na | NHEJ       | intronic         | MAP7                  | -   | protein_cod  | 0             | intronic         | MAP7                  | -   | protein_cod  | 0             |
| 619 | chr6 | 137313693 | + | chr6 | 137314187 | + | Y | Y | Y | Y | Y | Y | del | na | NHEJ       | ncRNA_intr       | RP11-55K22.5          | -   | lincRNA      | 0             | ncRNA_intr       | RP11-55K22.5          | -   | lincRNA      | 0             |
| 620 | chr6 | 148683250 | + | chr6 | 148684464 | + | N | Y | N | Y | Y | Y | del | na | alt-EJ     | intronic         | SASH1                 | +   | protein_cod  | 0             | intronic         | SASH1                 | +   | protein_cod  | 0             |
| 621 | chr6 | 152389991 | + | chr6 | 152392236 | + | Y | Y | Y | Y | Y | Y | del | na | alt-EJ     | intronic         | ESR1                  | +   | protein_cod  | 0             | intronic         | ESR1                  | +   | protein_cod  | 0             |
| 622 | chr6 | 153747364 | + | chr6 | 153748554 | + | Y | Y | N | Y | N | N | del | na | alt-EJ     | intergenic;ncRNA | SSP225,RP11-33'       | +,+ | rRNA_pseu    | 6847;238288   | intergenic;ncRNA | SSP225,RP11-331O      | +,+ | rRNA_pseu    | 6847;238288   |
| 623 | chr6 | 154619997 | + | chr6 | 154621513 | + | Y | Y | Y | Y | Y | Y | del | na | alt-EJ     | intronic         | IPCEF1                | +   | protein_cod  | 0             | intronic         | IPCEF1                | +   | protein_cod  | 0             |
| 624 | chr6 | 159126111 | + | chr6 | 159128432 | + | N | N | N | N | N | Y | del | na | alt-EJ     | intronic         | SYTL3                 | +   | protein_cod  | 0             | intronic         | SYTL3                 | +   | protein_cod  | 0             |
| 625 | chr6 | 159313925 | + | chr6 | 159318652 | + | Y | Y | Y | Y | Y | Y | del | na | alt-EJ     | intronic         | G6orf99               | +   | protein_cod  | 0             | intronic         | G6orf99               | +   | protein_cod  | 0             |
| 626 | chr6 | 160877814 | + | chr6 | 160895674 | + | Y | N | N | N | N | Y | del | na | alt-EJ     | ncRNA_intr       | LPA2                  | -   | pseudogene   | 0             | intronic         | LPA                   | -   | protein_cod  | 0             |
| 627 | chr6 | 160877897 | + | chr6 | 160895609 | + | N | Y | N | N | N | N | del | na | alt-EJ     | ncRNA_intr       | LPA2                  | -   | pseudogene   | 0             | intronic         | LPA                   | -   | protein_cod  | 0             |
| 628 | chr6 | 161263311 | + | chr6 | 161278498 | + | N | N | N | N | N | Y | del | na | alt-EJ     | intergenic       | PLG,RP11-235G24.1     | +,+ | protein_cod  | 104160;15422  | intergenic       | PLG,RP11-235G24.1     | +,+ | protein_cod  | 104160;15422  |
| 629 | chr6 | 165724667 | + | chr6 | 165732134 | + | Y | N | N | N | Y | Y | del | na | alt-EJ     | intergenic       | G6orf118,PDE10A       | +,+ | protein_cod  | 9038;8642     | intergenic       | G6orf118,PDE10A       | +,+ | protein_cod  | 9038;8642     |
| 630 | chr6 | 167488070 | + | chr6 | 167489577 | + | Y | N | N | N | N | N | del | na | NHEJ       | ncRNA_intr       | RP11-517H2.6          | +   | processed_   | 0             | ncRNA_intr       | RP11-517H2.6          | +   | processed_   | 0             |
| 631 | chr6 | 170206122 | + | chr6 | 170206406 | + | Y | N | N | N | N | N | del | na | alt-EJ     | intergenic       | LINC00574,RP1-182D15  | +,+ | lincRNA,linc | 3437;3008     | intergenic       | LINC00574,RP1-182D15  | +,+ | lincRNA,linc | 3437;3008     |
| 632 | chr6 | 170228977 | + | chr6 | 170229426 | + | N | Y | N | Y | Y | Y | del | na | alt-EJ     | intergenic       | RP1-182D15.2,RP11-302 | +,+ | lincRNA,ant  | 19228;248315  | intergenic       | RP1-182D15.2,RP11-302 | +,+ | lincRNA,ant  | 19228;248315  |
| 633 | chr7 | 224494    | + | chr7 | 225995    | + | Y | N | N | N | N | N | del | na | alt-EJ     | intronic         | FAM20C                | +   | protein_cod  | 0             | intronic         | FAM20C                | +   | protein_cod  | 0             |
| 634 | chr7 | 1944499   | + | chr7 | 1944493   | + | N | Y | N | N | N | N | del | na | alt-EJ     | intronic         | MAD1L1                | +   | protein_cod  | 0             | intronic         | MAD1L1                | +   | protein_cod  | 0             |
| 635 | chr7 | 5842872   | + | chr7 | 5843118   | + | N | N | N | N | N | Y | del | na | alt-EJ     | intergenic       | RNF216,ZNF815P        | +,+ | protein_cod  | 21748;19673   | intergenic       | RNF216,ZNF815P        | +,+ | protein_cod  | 21748;19673   |
| 636 | chr7 | 9730726   | + | chr7 | 9743956   | + | N | N | N | Y | Y | Y | del | na | NHEJ       | intergenic       | AC096553.5,AC06083.2  | +,+ | pseudogene   | 68623;21914   | intergenic       | AC096553.5,AC06083.2  | +,+ | pseudogene   | 68623;21914   |
| 637 | chr7 | 16171773  | + | chr7 | 16174073  | + | Y | Y | Y | Y | Y | Y | del | na | NHEJ       | intronic         | ISPD                  | -   | protein_cod  | 0             | intronic         | ISPD                  | -   | protein_cod  | 0             |
| 638 | chr7 | 22434801  | + | chr7 | 22436762  | + | Y | Y | Y | Y | Y | Y | del | na | alt-EJ     | intergenic       | AC099759.1,STEAP1B    | +,+ | miRNA,prot   | 17042;22301   | intergenic       | AC099759.1,STEAP1B    | +,+ | miRNA,prot   | 17042;22301   |
| 639 | chr7 | 24038163  | + | chr7 | 24040073  | + | Y | Y | Y | Y | Y | Y | del | na | alt-EJ     | intergenic       | AC009508.1,RNA5SP22   | +,+ | lincRNA,rnt  | 103119;132251 | intergenic       | AC009508.1,RNA5SP22   | +,+ | lincRNA,rnt  | 103119;132251 |
| 640 | chr7 | 46355983  | + | chr7 | 46362390  | + | Y | Y | Y | Y | Y | Y | del | na | alt-EJ     | ncRNA_intr       | AC092657.2            | +   | lincRNA      | 0             | ncRNA_intr       | AC092657.2            | +   | lincRNA      | 0             |
| 641 | chr7 | 52171075  | + | chr7 | 52397319  | + | N | Y | N | N | N | N | del | na | alt-EJ     | intergenic       | RN7SL292P,RP11-153    | +,+ | misc_RNA,l   | 5734;562211   | intergenic       |                       |     |              |               |

|     |      |           |   |      |           |   |   |   |   |   |   |   |     |    |        |               |                        |        |               |               |               |                        |        |               |               |
|-----|------|-----------|---|------|-----------|---|---|---|---|---|---|---|-----|----|--------|---------------|------------------------|--------|---------------|---------------|---------------|------------------------|--------|---------------|---------------|
| 667 | chr7 | 152111273 | + | chr7 | 152113612 | + | N | Y | Y | N | N | Y | del | na | alt-EJ | intronic      | KMT2C                  | -      | protein_cod   | 0             | intronic      | KMT2C                  | -      | protein_cod   | 0             |
| 668 | chr7 | 155726669 | + | chr7 | 155726917 | + | Y | N | N | N | N | N | del | na | alt-EJ | intergenic    | AC104133.1,AC02121     | ++     | miRNA,prot    | 61968;28657   | intergenic    | AC104133.1,AC021218.2  | ++     | miRNA,prot    | 62216;28409   |
| 669 | chr7 | 155726947 | + | chr7 | 155727203 | + | N | N | N | N | N | Y | del | na | alt-EJ | intergenic    | AC104133.1,AC02121     | ++     | miRNA,prot    | 62246;28379   | intergenic    | AC104133.1,AC021218.2  | ++     | miRNA,prot    | 62502;28123   |
| 670 | chr7 | 155726969 | + | chr7 | 155727455 | + | N | Y | N | N | N | N | del | na | alt-EJ | intergenic    | AC104133.1,AC02121     | ++     | miRNA,prot    | 62268;28357   | intergenic    | AC104133.1,AC021218.2  | ++     | miRNA,prot    | 62754;28781   |
| 671 | chr7 | 157733334 | + | chr7 | 157733532 | + | N | N | N | N | N | Y | del | na | alt-EJ | intronic      | PTPRN2                 | -      | protein_cod   | 0             | intronic      | PTPRN2                 | -      | protein_cod   | 0             |
| 672 | chr8 | 1837320   | + | chr8 | 1838045   | + | N | N | N | Y | N | N | del | na | alt-EJ | intronic      | ARHGEF10               | -      | protein_cod   | 0             | intronic      | ARHGEF10               | -      | protein_cod   | 0             |
| 673 | chr8 | 2122083   | + | chr8 | 2122348   | + | N | Y | N | Y | Y | N | del | na | alt-EJ | intergenic    | MYOM2,AC133633.2       | +-     | protein_cod   | 28703;228909  | intergenic    | MYOM2,AC133633.2       | +-     | protein_cod   | 28968;228644  |
| 674 | chr8 | 2215337   | + | chr8 | 2216121   | + | N | N | Y | Y | N | Y | del | na | alt-EJ | intergenic    | NONE,AC133633.2        | NONE,- | NONE,linCR    | NONE;135655   | intergenic    | NONE,AC133633.2        | NONE,- | NONE,linCR    | NONE;134871   |
| 675 | chr8 | 3994880   | + | chr8 | 3995338   | + | N | Y | Y | Y | N | N | del | na | NHEJ   | intronic      | CSMD1                  | -      | protein_cod   | 0             | intronic      | CSMD1                  | -      | protein_cod   | 0             |
| 676 | chr8 | 6991665   | + | chr8 | 6995406   | + | Y | Y | Y | Y | Y | Y | del | na | alt-EJ | intergenic    | RPS3AP30,AF228730      | +-     | pseudogene    | 10439;9489    | intergenic    | RPS3AP30,AF228730.12   | +-     | pseudogene    | 14180;5748    |
| 677 | chr8 | 9497866   | + | chr8 | 9501000   | + | N | Y | Y | Y | N | N | del | na | alt-EJ | intronic      | TNKS                   | -      | protein_cod   | 0             | intronic      | TNKS                   | -      | protein_cod   | 0             |
| 678 | chr8 | 12427293  | + | chr8 | 12485593  | + | N | Y | N | N | N | N | del | na | alt-EJ | downstream    | RPS3AP34               | -      | pseudogene    | 0             | downstream    | RPS3AP35               | -      | pseudogene    | 0             |
| 679 | chr8 | 12427987  | + | chr8 | 12485566  | + | N | Y | Y | N | N | N | del | na | alt-EJ | ncRNA_exo     | RPS3AP34               | -      | pseudogene    | 0             | downstream    | RPS3AP35               | -      | pseudogene    | 0             |
| 680 | chr8 | 20943403  | + | chr8 | 20943807  | + | N | N | Y | Y | N | N | del | na | NHEJ   | intergenic    | RP11-421P23.2,AC021    | ++     | lincRNA,mif   | 56834;70239   | intergenic    | RP11-421P23.2,AC0216   | ++     | lincRNA,mif   | 57238;69835   |
| 681 | chr8 | 25066681  | + | chr8 | 25070656  | + | Y | Y | Y | Y | Y | Y | del | na | alt-EJ | intronic      | DOCK5                  | -      | protein_cod   | 0             | intronic      | DOCK5                  | -      | protein_cod   | 0             |
| 682 | chr8 | 32152230  | + | chr8 | 32154994  | + | Y | Y | Y | Y | Y | N | del | na | alt-EJ | intronic      | NRG1                   | -      | protein_cod   | 0             | intronic      | NRG1                   | -      | protein_cod   | 0             |
| 683 | chr8 | 32680007  | + | chr8 | 32691264  | + | Y | Y | Y | Y | Y | Y | del | na | alt-EJ | intergenic    | RP11-1002K11.1,RNU6    | +-     | lincRNA,snf   | 54530;89004   | intergenic    | RP11-1002K11.1,RNU6-6  | +-     | lincRNA,snf   | 65787;77747   |
| 684 | chr8 | 51224983  | + | chr8 | 51228316  | + | Y | Y | Y | Y | Y | Y | del | na | alt-EJ | intronic      | SNTG1                  | +      | protein_cod   | 0             | intronic      | SNTG1                  | +      | protein_cod   | 0             |
| 685 | chr8 | 54122552  | + | chr8 | 54123649  | + | Y | Y | Y | Y | Y | Y | del | na | alt-EJ | ncRNA_intr    | RP11-162D9.3           | +      | antisense     | 0             | ncRNA_intr    | RP11-162D9.3           | +      | antisense     | 0             |
| 686 | chr8 | 58116933  | + | chr8 | 58118309  | + | Y | N | N | N | N | N | del | na | alt-EJ | ncRNA_intr    | RP11-513017.2          | +      | lincRNA       | 0             | ncRNA_intr    | RP11-513017.2          | +      | lincRNA       | 0             |
| 687 | chr8 | 80029401  | + | chr8 | 80137177  | + | N | N | N | Y | N | N | del | na | alt-EJ | intergenic    | AC009941.1,RP11-111    | ++     | miRNA,linCR   | 19713;180551  | intergenic    | AC009941.1,RP11-11141  | ++     | miRNA,linCR   | 127489;72775  |
| 688 | chr8 | 108380699 | + | chr8 | 108381100 | + | N | Y | N | N | N | N | del | na | alt-EJ | intronic      | ANGPT1                 | -      | protein_cod   | 0             | intronic      | ANGPT1                 | -      | protein_cod   | 0             |
| 689 | chr8 | 110234719 | + | chr8 | 110235053 | + | Y | Y | Y | Y | Y | Y | del | na | NHEJ   | intergenic    | TRHR,NUDCD1            | +-     | protein_cod   | 102906;18429  | intergenic    | TRHR,NUDCD1            | +-     | protein_cod   | 103240;18095  |
| 690 | chr8 | 112294051 | + | chr8 | 112297140 | + | Y | Y | Y | Y | Y | Y | del | na | NHEJ   | intergenic    | RP11-946L20.4,RP11-111 | +-     | lincRNA,linCR | 45619;94817   | intergenic    | RP11-946L20.4,RP11-111 | +-     | lincRNA,linCR | 48708;91728   |
| 691 | chr8 | 138742966 | + | chr8 | 138743863 | + | Y | Y | Y | Y | Y | Y | del | na | alt-EJ | intergenic    | CTD-3145H4.1,RP11-231  | +-     | pseudogene    | 32256;78721   | intergenic    | CTD-3145H4.1,RP11-231  | +-     | pseudogene    | 33153;77824   |
| 692 | chr8 | 143337715 | + | chr8 | 144016829 | + | Y | N | N | N | N | N | del | na | alt-EJ | intronic      | TSNARE1                | -      | protein_cod   | 0             | intronic      | CYP11B2,RP11-273G15    | -      | protein_cod   | 17570;46326   |
| 693 | chr8 | 143337969 | + | chr8 | 144016830 | + | N | Y | Y | Y | Y | Y | del | na | alt-EJ | intronic      | TSNARE1                | -      | protein_cod   | 0             | intronic      | CYP11B2,RP11-273G15    | -      | protein_cod   | 17571;46325   |
| 694 | chr8 | 143397458 | + | chr8 | 143398513 | + | N | N | N | Y | N | N | del | na | NHEJ   | intronic;intr | TSNARE1                | -      | protein_cod   | 0             | intronic      | TSNARE1                | -      | protein_cod   | 0             |
| 695 | chr8 | 143397458 | + | chr8 | 143398621 | + | Y | N | Y | N | N | N | del | na | NHEJ   | intronic;intr | TSNARE1                | -      | protein_cod   | 0             | intronic      | TSNARE1                | -      | protein_cod   | 0             |
| 696 | chr8 | 143397458 | + | chr8 | 143398657 | + | N | Y | N | Y | N | N | del | na | NHEJ   | intronic;intr | TSNARE1                | -      | protein_cod   | 0             | intronic      | TSNARE1                | -      | protein_cod   | 0             |
| 697 | chr8 | 144634065 | + | chr8 | 144636241 | + | Y | Y | Y | Y | Y | N | del | na | alt-EJ | intergenic    | RP11-661A12.5,GSDM     | +-     | antisense,pi  | 2166;1312     | intronic      | GSDM                   | +      | protein_cod   | 0             |
| 698 | chr8 | 144748661 | + | chr8 | 144749103 | + | N | N | N | N | N | Y | del | na | alt-EJ | intergenic    | ZNF623,ZNF707          | ++     | protein_cod   | 12761;17961   | intergenic    | ZNF623,ZNF707          | ++     | protein_cod   | 13203;17519   |
| 699 | chr8 | 146057038 | + | chr8 | 146057850 | + | N | Y | Y | N | N | N | del | na | alt-EJ | intronic      | ZNF7                   | -      | protein_cod   | 0             | intronic      | ZNF7                   | -      | protein_cod   | 0             |
| 700 | chr9 | 3107534   | + | chr9 | 4190314   | + | N | Y | N | N | N | N | del | na | alt-EJ | intergenic    | CARM1P1,RP11-32F1      | +-     | pseudogene    | 54126;74055   | intronic      | GLIS3                  | -      | protein_cod   | 0             |
| 701 | chr9 | 3107563   | + | chr9 | 4190437   | + | N | N | N | N | Y | N | del | na | alt-EJ | intergenic    | CARM1P1,RP11-32F1      | +-     | pseudogene    | 54155;74026   | intronic      | GLIS3                  | -      | protein_cod   | 0             |
| 702 | chr9 | 6702466   | + | chr9 | 6705127   | + | N | Y | N | N | N | N | del | na | alt-EJ | intergenic    | RP11-390F4.2,RP11-3    | +-     | pseudogene    | 26852;2005    | ncRNA_intr    | RP11-390F4.10          | +      | lincRNA       | 0             |
| 703 | chr9 | 10404562  | + | chr9 | 10405093  | + | Y | N | Y | Y | Y | Y | del | na | alt-EJ | intronic      | PTPRD                  | -      | protein_cod   | 0             | intronic      | PTPRD                  | -      | protein_cod   | 0             |
| 704 | chr9 | 11217954  | + | chr9 | 11220098  | + | N | Y | N | Y | N | N | del | na | alt-EJ | intergenic    | RP11-109M17.1,RP11-    | +-     | pseudogene    | 204858;57360  | intergenic    | RP11-109M17.1,RP11-22  | +-     | pseudogene    | 207002;55216  |
| 705 | chr9 | 15815307  | + | chr9 | 15821942  | + | Y | Y | Y | Y | Y | Y | del | na | alt-EJ | intronic      | CDC171                 | +      | protein_cod   | 0             | intronic      | CDC171                 | +      | protein_cod   | 0             |
| 706 | chr9 | 23115020  | + | chr9 | 23115322  | + | N | Y | N | N | N | N | del | na | alt-EJ | intergenic    | AL391117.1,SUMO2P2     | +-     | miRNA,pse     | 161918;517084 | intergenic    | AL391117.1,SUMO2P2     | +-     | miRNA,pse     | 162220;516782 |
| 707 | chr9 | 24456327  | + | chr9 | 24457598  | + | N | Y | N | N | N | N | del | na | alt-EJ | intergenic    | RP11-321L2.2,IZUMO3    | +-     | lincRNA,prc   | 558275;86623  | intergenic    | RP11-321L2.2,IZUMO3    | +-     | lincRNA,prc   | 559546;85352  |
| 708 | chr9 | 24456331  | + | chr9 | 24457110  | + | Y | N | Y | Y | Y | Y | del | na | alt-EJ | intergenic    | RP11-321L2.2,IZUMO3    | +-     | lincRNA,prc   | 558279;86619  | intergenic    | RP11-321L2.2,IZUMO3    | +-     | lincRNA,prc   | 559568;85240  |
| 709 | chr9 | 28047359  | + | chr9 | 28051256  | + | N | Y | N | N | N | N | del | na | alt-EJ | intronic;intr | LINGO2                 | -      | protein_cod   | 0             | intronic;intr | LINGO2                 | -      | protein_cod   | 0             |
| 710 | chr9 | 28676975  | + | chr9 | 28710755  | + | Y | Y | Y | Y | Y | N | del | na | alt-EJ | intergenic    | LINGO2,MIR876          | +-     | protein_cod   | 6692;186649   | intergenic    | LINGO2,MIR876          | +-     | protein_cod   | 40472;152869  |
| 711 | chr9 | 29092575  | + | chr9 | 29098016  | + | Y | Y | Y | Y | Y | Y | del | na | alt-EJ | intergenic    | MIR873,RP11-373A6.1    | +-     | miRNA,pse     | 203622;161498 | intergenic    | MIR873,RP11-373A6.1    | +-     | miRNA,pse     | 209063;156057 |
| 712 | chr9 | 31291355  | + | chr9 | 31292673  | + | Y | Y | Y | Y | Y | Y | del | na | NHEJ   | intergenic    | SLC25A6P2,RP11-271     | +-     | pseudogene    | 36580;80254   | intergenic    | SLC25A6P2,RP11-271O    | +-     | pseudogene    | 37898;78936   |
| 713 | chr9 | 33573402  | + | chr9 | 33574215  | + | Y | N | Y | N | Y | Y | del | na | alt-EJ | downstream    | RP11-255A11.4,ANKR     | +-     | pseudogene    | 0             | downstream    | RP11-255A11.4          | +      | pseudogene    | 0             |
| 714 | chr9 | 36362899  | + | chr9 | 36364098  | + | N | Y | N | N | N | N | del | na | alt-EJ | intronic      | RNF38                  | -      | protein_cod   | 0             | intronic      | RNF38                  | -      | protein_cod   | 0             |
| 715 | chr9 | 69786722  | + | chr9 | 69787295  | + | N | N | Y | N | N | N | del | na | alt-EJ | intergenic    | IGKV1OR-2,AL359955     | -      | IG_V_pseu     | 8769;35038    | intergenic    | IGKV1OR-2,AL359955.1   | -      | IG_V_pseu     | 9342;34465    |
| 716 | chr9 | 69787281  | + | chr9 | 69787508  | + | Y | N | N | N | N | N | del | na | alt-EJ | intergenic    | IGKV1OR-2,AL359955     | -      | IG_V_pseu     | 9328;34479    | intergenic    | IGKV1OR-2,AL359955.1   | -      | IG_V_pseu     | 9555;34252    |
| 717 | chr9 | 71738121  | + | chr9 | 71743356  | + | Y | Y | Y | Y | Y | Y | del | na | alt-EJ | intronic      | TJP2                   | +      | protein_cod   | 0             | intronic      | TJP2                   | +      | protein_cod   | 0             |
| 718 | chr9 | 82028161  | + | chr9 | 82033450  | + | Y | Y | Y | Y | Y | Y | del | na | alt-EJ | intergenic    | CHCHD2P9,RP11-375      | +-     | pseudogene    | 21487;92558   | intergenic    | CHCHD2P9,RP11-375O     | +-     | pseudogene    | 26776;87269   |
| 719 | chr9 | 82774772  | + | chr9 | 82776690  | + | Y | Y | Y | Y | Y | Y | del | na | alt-EJ | intergenic    | RP11-394O9.1,NPAP1P4   | +-     | lincRNA,pse   | 125302;197172 | intergenic    | RP11-394O9.1,NPAP1P4   | +-     | lincRNA,pse   | 172220;195254 |
| 720 | chr9 | 92176046  | + | chr9 | 92177796  | + | Y | Y | Y | Y | Y | Y | del | na | NHEJ   | intergenic    | SEMA4D,GADD45G         | +-     | protein_cod   | 63001;43882   | intergenic    | SEMA4D,GADD45G         | +-     | protein_cod   | 64931;41952   |
| 721 | chr9 | 96470354  | + | chr9 | 96471465  | + | Y | Y | Y | Y | Y | Y | del | na | NHEJ   | intergenic    | PHF2,MIR4291           | ++     | protein_cod   | 28485;111285  | intergenic    | PHF2,MIR4291           | ++     | protein_cod   | 29596;110174  |
| 722 | chr9 | 108476303 | + | chr9 | 108478943 | + | N | Y | N | Y | N | N | del | na | NHEJ   | intronic      | TMEM38B                | +      | protein_cod   | 0             | intronic      | TMEM38B                | +      | protein_cod   | 0             |
| 723 | chr9 | 124411498 | + | chr9 | 124411801 | + | N | N | Y | Y | Y | N | del | na | alt-EJ | intronic      | DAB2IP                 | +      | protein_cod   | 0             | intronic      | DAB2IP                 | +      | protein_cod   | 0             |
| 724 | chr9 | 130901473 | + | chr9 | 130901989 | + | N | Y | N | N | N | N | del | na | alt-EJ | intergenic    | AL590708.2,LCN2        | ++     | protein_cod   | 9992;9877     | intergenic    | AL590708.2,LCN2        | ++     | protein_cod   | 10508;9361    |
| 725 | chr9 | 130901854 | + | chr9 | 130901980 | + | N | Y | N | Y | N | N | del | na | alt-EJ | intergenic    | AL590708.2,LCN2        | ++     | protein_cod   | 10373;9496    | intergenic    | AL590708.2,LCN2        | ++     | protein_cod   | 10499;9370    |

|     |       |           |   |       |           |   |   |   |   |   |   |   |              |    |        |                  |                           |   |              |               |                |                       |   |              |               |
|-----|-------|-----------|---|-------|-----------|---|---|---|---|---|---|---|--------------|----|--------|------------------|---------------------------|---|--------------|---------------|----------------|-----------------------|---|--------------|---------------|
| 751 | chr1  | 7570071   | + | chr1  | 7571527   | + | N | Y | Y | Y | N | N | del_ins_ukrs | na | FoSteS | intronic;intrc   | CAMTA1                    | + | protein_cod  | 0             | intronic;intrc | CAMTA1                | + | protein_cod  | 0             |
| 752 | chr1  | 9595665   | + | chr1  | 9597125   | + | N | N | Y | N | N | N | del_ins_ukrs | na | FoSteS | intergenic       | RP13-39216.1,SLC25        | + | lincRNA,prc  | 32135;3876    | intergenic     | RP13-39216.1,SLC25A3  | + | lincRNA,prc  | 33595;2416    |
| 753 | chr1  | 17229801  | + | chr1  | 145382197 | + | N | N | N | N | N | Y | del_ins_ukrs | na | FoSteS | intergenic       | RNU1-2,RP11-108M9.1       | + | snRNA,lincf  | 7163;1033     | ncRNA_exo      | RP11-458D21.1         | + | lincRNA      | 0             |
| 754 | chr1  | 24520347  | + | chr1  | 24523675  | + | Y | Y | Y | Y | N | Y | del_ins_ukrs | na | FoSteS | intergenic       | IFNLR1,RP11-10N16.2       | + | protein_cod  | 5898;6383     | intergenic     | IFNLR1,RP11-10N16.2   | + | protein_cod  | 9226;3055     |
| 755 | chr1  | 38132311  | + | chr1  | 38132982  | + | N | Y | Y | Y | Y | Y | del_ins_ukrs | na | FoSteS | intergenic       | RSPO1,C1orf109            | + | protein_cod  | 31716;14931   | intergenic     | RSPO1,C1orf109        | + | protein_cod  | 32387;14260   |
| 756 | chr1  | 72449620  | + | chr1  | 72450033  | + | Y | Y | Y | Y | N | Y | del_ins_ukrs | na | NHEJ   | intronic         | NEGR1                     | - | protein_cod  | 0             | intronic       | NEGR1                 | - | protein_cod  | 0             |
| 757 | chr1  | 76111576  | + | chr1  | 79480752  | + | N | N | N | N | Y | N | del_ins_ukrs | na | FoSteS | intergenic       | RSPO1,RP11-414B7.1,RP11-2 | + | pseudogene   | 3804;6412     | intergenic     | ELTD1,PSAT1P3         | - | protein_cod  | 8349;39878    |
| 758 | chr1  | 86400851  | + | chr1  | 86404539  | + | Y | Y | N | Y | Y | Y | del_ins_ukrs | na | NHEJ   | intronic;intrc   | COL24A1                   | - | protein_cod  | 0             | intronic;intrc | COL24A1               | - | protein_cod  | 0             |
| 759 | chr1  | 106015814 | + | chr1  | 106023398 | + | Y | Y | Y | Y | Y | Y | del_ins_ukrs | na | NHEJ   | intergenic       | RP11-414B7.1,RP11-2       | + | pseudogene   | 38371;114383  | intergenic     | RP11-414B7.1,RP11-251 | + | pseudogene   | 45955;106799  |
| 760 | chr1  | 108733324 | + | chr1  | 108737252 | + | Y | Y | Y | Y | Y | Y | del_ins_ukrs | na | FoSteS | intronic         | SLC25A24                  | + | protein_cod  | 0             | intronic       | SLC25A24              | + | protein_cod  | 0             |
| 761 | chr1  | 120393298 | + | chr1  | 147389638 | + | N | Y | Y | Y | Y | Y | del_ins_ukrs | na | FoSteS | intergenic;intrc | NBP7,PFN1P9               | + | pseudogene   | 5519;2841     | intergenic;ir  | GJA8,GPR89B           | + | protein_cod  | 8245;10868    |
| 762 | chr1  | 144896297 | + | chr1  | 144901047 | + | Y | Y | Y | Y | Y | Y | del_ins_ukrs | na | NHEJ   | intronic         | PDE4DIP                   | - | protein_cod  | 0             | UTR3           | PDE4DIP               | - | protein_cod  | 0             |
| 763 | chr1  | 157173864 | + | chr1  | 157175397 | + | Y | Y | Y | Y | Y | Y | del_ins_ukrs | na | FoSteS | intergenic       | RP11-71G12.1,RP11-8       | + | lincRNA,linc | 16669;28157   | intergenic     | RP11-71G12.1,RP11-85C | + | lincRNA,linc | 18202;26624   |
| 764 | chr1  | 179607288 | + | chr1  | 179608060 | + | Y | Y | Y | Y | N | N | del_ins_ukrs | na | NHEJ   | intronic         | TDRD5                     | + | protein_cod  | 0             | intronic       | TDRD5                 | + | protein_cod  | 0             |
| 765 | chr1  | 194451064 | + | chr1  | 194454313 | + | Y | N | N | N | N | N | del_ins_ukrs | na | NHEJ   | intergenic       | RP11-476H20.1,RNU6        | + | lincRNA,snf  | 129508;6169   | intergenic;ir  | RP11-476H20.1,RNU6-9i | + | lincRNA,snf  | 132757;2920   |
| 766 | chr1  | 207292347 | + | chr1  | 207293196 | + | N | N | N | N | N | Y | del_ins_ukrs | na | NHEJ   | intronic         | C4BPA                     | + | protein_cod  | 0             | intronic       | C4BPA                 | + | protein_cod  | 0             |
| 767 | chr1  | 207292362 | + | chr1  | 207292854 | + | Y | Y | Y | Y | N | N | del_ins_ukrs | na | NHEJ   | intronic         | C4BPA                     | + | protein_cod  | 0             | intronic       | C4BPA                 | + | protein_cod  | 0             |
| 768 | chr1  | 222558223 | + | chr1  | 222561017 | + | N | Y | Y | Y | Y | Y | del_ins_ukrs | na | NHEJ   | ncRNA_intrn      | RP11-400N13.1             | - | lincRNA      | 0             | upstream       | RP11-400N13.1         | - | lincRNA      | 0             |
| 769 | chr1  | 225132981 | + | chr1  | 225248843 | + | Y | N | N | N | N | N | del_ins_ukrs | na | NHEJ   | intronic         | DNAH14                    | + | protein_cod  | 0             | intronic       | DNAH14                | + | protein_cod  | 0             |
| 770 | chr1  | 240392999 | + | chr1  | 240394783 | + | N | Y | N | N | Y | Y | del_ins_ukrs | na | NHEJ   | intronic         | FMN2                      | + | protein_cod  | 0             | intronic       | FMN2                  | + | protein_cod  | 0             |
| 771 | chr10 | 4708518   | + | chr10 | 4710253   | + | Y | Y | Y | Y | Y | Y | del_ins_ukrs | na | NHEJ   | ncRNA_intrn      | LINC00704                 | + | lincRNA      | 0             | ncRNA_intrn    | LINC00704             | + | lincRNA      | 0             |
| 772 | chr10 | 25492525  | + | chr10 | 25429592  | + | N | Y | Y | Y | Y | N | del_ins_ukrs | na | NHEJ   | intronic         | GPR158                    | + | protein_cod  | 0             | intronic       | GPR158                | + | protein_cod  | 0             |
| 773 | chr10 | 27638254  | + | chr10 | 27642097  | + | Y | Y | Y | Y | Y | Y | del_ins_ukrs | na | NHEJ   | downstream       | FAM210CP                  | - | pseudogene   | 0             | intergenic     | FAM210CP,TRIAP1P1     | + | pseudogene   | 2878;24970    |
| 774 | chr10 | 28663803  | + | chr10 | 28665096  | + | Y | Y | Y | Y | Y | Y | del_ins_ukrs | na | FoSteS | intergenic       | ZNF101P1,U3               | + | pseudogene   | 33932;33166   | intergenic     | ZNF101P1,U3           | + | pseudogene   | 35225;31873   |
| 775 | chr10 | 42673128  | + | chr10 | 42673432  | + | N | N | N | N | N | N | del_ins_ukrs | na | FoSteS | intergenic       | KSR1P1,IGKV1OR10-         | + | pseudogene   | 15906;15043   | intergenic;ir  | KSR1P1,IGKV1OR10-1    | + | pseudogene   | 28435;7355    |
| 776 | chr10 | 42673287  | + | chr10 | 42673432  | + | N | N | N | N | N | Y | del_ins_ukrs | na | FoSteS | intergenic       | KSR1P1,IGKV1OR10-         | + | pseudogene   | 28290;7500    | intergenic;ir  | KSR1P1,IGKV1OR10-1    | + | pseudogene   | 28435;7355    |
| 777 | chr10 | 55893665  | + | chr10 | 55894133  | + | Y | Y | Y | Y | Y | Y | del_ins_ukrs | na | NHEJ   | intronic         | PCDH15                    | - | protein_cod  | 0             | intronic       | PCDH15                | - | protein_cod  | 0             |
| 778 | chr10 | 67032386  | + | chr10 | 67032802  | + | Y | Y | Y | Y | Y | Y | del_ins_ukrs | na | FoSteS | intergenic       | RP11-252C24.2,RP11-       | + | pseudogene   | 23836;41157   | intergenic     | RP11-252C24.2,RP11-42 | + | pseudogene   | 24252;40741   |
| 779 | chr10 | 81092182  | + | chr10 | 81092781  | + | Y | Y | Y | Y | Y | Y | del_ins_ukrs | na | FoSteS | intergenic       | ZMIZ1,PP1F                | + | protein_cod  | 15906;15043   | intergenic     | ZMIZ1,PP1F            | + | protein_cod  | 16505;14444   |
| 780 | chr10 | 92461854  | + | chr10 | 92465630  | + | N | Y | Y | Y | Y | Y | del_ins_ukrs | na | NHEJ   | intergenic       | RP11-15K3.1,HTR7          | + | lincRNA,prc  | 161292;38724  | intergenic     | RP11-15K3.1,HTR7      | + | lincRNA,prc  | 16508;34948   |
| 781 | chr10 | 94134599  | + | chr10 | 94137654  | + | Y | Y | Y | Y | Y | Y | del_ins_ukrs | na | FoSteS | intergenic       | MARCH5,MARK2P9            | + | protein_cod  | 20878;43825   | intergenic     | MARCH5,MARK2P9        | + | protein_cod  | 23933;40770   |
| 782 | chr10 | 95545477  | + | chr10 | 95546496  | + | Y | Y | Y | Y | Y | Y | del_ins_ukrs | na | FoSteS | intronic         | LGI1                      | + | protein_cod  | 0             | intronic       | LGI1                  | + | protein_cod  | 0             |
| 783 | chr10 | 124216820 | + | chr10 | 124217264 | + | Y | Y | Y | Y | Y | Y | del_ins_ukrs | na | FoSteS | UTR3             | ARMS2                     | + | protein_cod  | 0             | downstream     | ARMS2                 | + | protein_cod  | 0             |
| 784 | chr11 | 5760087   | + | chr11 | 5762366   | + | Y | Y | Y | Y | Y | N | del_ins_ukrs | na | NHEJ   | intronic         | TRIM5                     | - | protein_cod  | 0             | intronic       | TRIM5                 | - | protein_cod  | 0             |
| 785 | chr11 | 6881365   | + | chr11 | 6881965   | + | Y | Y | Y | Y | Y | Y | del_ins_ukrs | na | FoSteS | intergenic       | OR10A5,OR10A2             | + | protein_cod  | 13429;9559    | intergenic     | OR10A5,OR10A2         | + | protein_cod  | 14029;8959    |
| 786 | chr11 | 29007202  | + | chr11 | 29012889  | + | Y | Y | Y | Y | Y | Y | del_ins_ukrs | na | FoSteS | ncRNA_intrn      | RP11-115J23.1             | + | lincRNA      | 0             | ncRNA_intrn    | RP11-115J23.1         | + | lincRNA      | 0             |
| 787 | chr11 | 39795370  | + | chr11 | 39796866  | + | Y | N | N | Y | Y | Y | del_ins_ukrs | na | NHEJ   | intergenic;intrc | AC027806.1,AC02174        | + | miRNA,miR    | 42917;87686   | intergenic;ir  | AC027806.1,AC021749.1 | + | miRNA,miR    | 44413;86190   |
| 788 | chr11 | 47057588  | + | chr11 | 47063707  | + | Y | Y | Y | Y | Y | Y | del_ins_ukrs | na | FoSteS | intronic         | C11orf49                  | + | protein_cod  | 0             | intronic       | C11orf49              | + | protein_cod  | 0             |
| 789 | chr11 | 47660351  | + | chr11 | 47663929  | + | Y | N | N | N | N | N | del_ins_ukrs | na | FoSteS | exonic           | MTCH2                     | - | protein_cod  | 0             | splicing       | MTCH2                 | - | protein_cod  | 0             |
| 790 | chr11 | 63698350  | + | chr11 | 63702022  | + | Y | N | N | N | N | N | del_ins_ukrs | na | FoSteS | intergenic       | RCOR2,NA40                | + | protein_cod  | 14034;8118    | intergenic     | RCOR2,NA40            | + | protein_cod  | 17706;4446    |
| 791 | chr11 | 63698907  | + | chr11 | 63701944  | + | N | N | Y | N | N | N | del_ins_ukrs | na | FoSteS | intergenic       | RCOR2,NA40                | + | protein_cod  | 14591;7561    | intergenic     | RCOR2,NA40            | + | protein_cod  | 17628;4524    |
| 792 | chr11 | 128682716 | + | chr11 | 128683411 | + | Y | Y | Y | N | Y | Y | del_ins_ukrs | na | NHEJ   | UTR3             | FLI1                      | + | protein_cod  | 0             | downstream     | FLI1                  | + | protein_cod  | 0             |
| 793 | chr12 | 7018316   | + | chr12 | 7018676   | + | N | N | N | Y | Y | N | del_ins_ukrs | na | VNTR   | intronic         | LRRC23                    | + | protein_cod  | 0             | intronic       | LRRC23                | + | protein_cod  | 0             |
| 794 | chr12 | 11173687  | + | chr12 | 11200350  | + | N | N | Y | Y | Y | Y | del_ins_ukrs | na | FoSteS | downstream       | TAS2R19                   | - | protein_cod  | 0             | downstream     | TAS2R63P              | - | pseudogene   | 0             |
| 795 | chr12 | 11211280  | + | chr12 | 11211924  | + | N | N | N | Y | N | N | del_ins_ukrs | na | NHEJ   | intergenic;intrc | TAS2R63P,TAS2R46          | + | pseudogene   | 9425;2684     | intergenic     | TAS2R63P,TAS2R46      | + | pseudogene   | 10069;2040    |
| 796 | chr12 | 11211280  | + | chr12 | 11242125  | + | N | N | Y | N | N | N | del_ins_ukrs | na | NHEJ   | intergenic;intrc | TAS2R63P,TAS2R46          | + | pseudogene   | 9425;2684     | intergenic     | TAS2R64P,TAS2R43      | + | pseudogene   | 10355;1761    |
| 797 | chr12 | 11211280  | + | chr12 | 11283949  | + | N | N | N | N | Y | Y | del_ins_ukrs | na | NHEJ   | intergenic;intrc | TAS2R63P,TAS2R46          | + | pseudogene   | 9425;2684     | intergenic     | RP11-673D15.7,TAS2R3  | + | pseudogene   | 34076;1608    |
| 798 | chr12 | 11237390  | + | chr12 | 11279318  | + | N | N | N | N | Y | Y | del_ins_ukrs | na | FoSteS | intergenic       | TAS2R64P,TAS2R43          | + | pseudogene   | 5620;6496     | intergenic     | RP11-673D15.7,TAS2R3  | + | pseudogene   | 29445;6239    |
| 799 | chr12 | 16420123  | + | chr12 | 16421284  | + | Y | Y | Y | Y | Y | Y | del_ins_ukrs | na | NHEJ   | intronic         | SLC15A5                   | - | protein_cod  | 0             | intronic       | SLC15A5               | - | protein_cod  | 0             |
| 800 | chr12 | 42512966  | + | chr12 | 42538226  | + | Y | N | N | N | N | N | del_ins_ukrs | na | NHEJ   | exonic           | GXYLT1                    | - | protein_cod  | 0             | splicing       | GXYLT1                | - | protein_cod  | 0             |
| 801 | chr12 | 45967248  | + | chr12 | 45967630  | + | N | Y | Y | N | Y | Y | del_ins_ukrs | na | FoSteS | ncRNA_intrn      | RP11-352M15.1             | - | lincRNA      | 0             | ncRNA_intrn    | RP11-352M15.1         | - | lincRNA      | 0             |
| 802 | chr12 | 54840542  | + | chr12 | 54841195  | + | Y | Y | Y | Y | Y | Y | del_ins_ukrs | na | NHEJ   | ncRNA_intrn      | RP11-753H16.5,RP11-       | + | antisense,ai | 65190;1009    | downstream     | Y_RNA                 | + | antisense,ai | 0             |
| 803 | chr12 | 96010456  | + | chr12 | 96012329  | + | N | Y | Y | Y | N | N | del_ins_ukrs | na | FoSteS | intergenic       | USP44_Y_RNA               | + | misc_RNA     | 0             | exonic         | USP44_Y_RNA           | + | misc_RNA     | 0             |
| 804 | chr13 | 21732265  | + | chr13 | 21735929  | + | Y | N | Y | Y | Y | Y | del_ins_ukrs | na | FoSteS | splicing         | SKA3                      | - | protein_cod  | 0             | exonic         | SKA3                  | - | protein_cod  | 0             |
| 805 | chr13 | 21734127  | + | chr13 | 21742127  | + | N | Y | Y | Y | Y | Y | del_ins_ukrs | na | FoSteS | splicing         | SKA3                      | - | protein_cod  | 0             | exonic         | SKA3                  | - | protein_cod  | 0             |
| 806 | chr13 | 65133014  | + | chr13 | 65133674  | + | Y | Y | Y | Y | Y | Y | del_ins_ukrs | na | NHEJ   | intergenic       | LINC00355,LGMNP1          | + | lincRNA,psc  | 482870;399215 | intergenic     | LINC00355,LGMNP1      | + | lincRNA,psc  | 483530;398555 |
| 807 | chr13 | 68936888  | + | chr13 | 68937267  | + | Y | Y | Y | Y | Y | Y | del_ins_ukrs | na | NHEJ   | intergenic       | RPL37P21,RPS3AP52         | + | pseudogene   | 31143;271434  | intergenic     | RPL37P21,RPS3AP52     | + | pseudogene   | 31522;271055  |
| 808 | chr13 | 72843037  | + | chr13 | 72846925  | + | Y | Y | Y | Y | Y | Y | del_ins_ukrs | na | NHEJ   | intergenic       | RNA5SP32,SNORD37          | + | rRNA,snoR    | 290693;185003 | intergenic     | RNA5SP32,SNORD37      | + | rRNA,snoR    | 294581;181115 |
| 809 | chr13 | 73299597  | + | chr13 | 73300306  | + | Y | Y | Y | Y | Y | Y | del_ins_ukrs | na | NHEJ   | intronic         | MZT1                      | - | protein_cod  | 0             | intronic       | MZ                    |   |              |               |

|     |       |           |   |       |           |   |   |   |   |   |   |              |    |        |                 |                       |         |              |              |               |                        |         |              |               |
|-----|-------|-----------|---|-------|-----------|---|---|---|---|---|---|--------------|----|--------|-----------------|-----------------------|---------|--------------|--------------|---------------|------------------------|---------|--------------|---------------|
| 835 | chr16 | 88862632  | + | chr16 | 88863602  | + | Y | Y | Y | Y | Y | del_ins_ukrs | na | FoSTeS | intergenic      | PIEZO1,CDT1           | -,+     | protein_cod  | 11013;6989   | intergenic    | PIEZO1,CDT1            | -,+     | protein_cod  | 11983;6019    |
| 836 | chr17 | 1654669   | + | chr17 | 1655401   | + | N | N | N | Y | N | del_ins_ukrs | na | NHEJ   | intronic        | SERPINF2              | +       | protein_cod  | 0            | intronic      | SERPINF2               | +       | protein_cod  | 0             |
| 837 | chr17 | 11411667  | + | chr17 | 11412338  | + | N | N | N | Y | Y | del_ins_ukrs | na | FoSTeS | intronic;intr   | SHISA6                | +       | protein_cod  | 0            | intronic;intr | SHISA6                 | +       | protein_cod  | 0             |
| 838 | chr17 | 15183463  | + | chr17 | 15185720  | + | N | Y | Y | Y | Y | del_ins_ukrs | na | NHEJ   | upstream;u      | AC005703.2            | -       | lincRNA      | 0            | intergenic;ir | AC005703.2,TEKT3       | -,-     | lincRNA,prc  | 2926;21408    |
| 839 | chr17 | 15882895  | + | chr17 | 15883151  | + | N | N | Y | Y | N | del_ins_ukrs | na | FoSTeS | intronic        | ZSWIM7                | -       | protein_cod  | 0            | intronic      | ZSWIM7                 | -       | protein_cod  | 0             |
| 840 | chr17 | 16505449  | + | chr17 | 16506299  | + | Y | N | N | Y | N | del_ins_ukrs | na | NHEJ   | intronic        | ZNF287,AC005822.1     | -,-     | protein_cod  | 32929;14713  | intergenic    | ZNF287,AC005822.1      | +       | protein_cod  | 33779;13863   |
| 841 | chr17 | 21321277  | + | chr17 | 21322822  | + | Y | N | Y | Y | Y | del_ins_ukrs | na | NHEJ   | UTR3;UTR        | KCNJ12                | +       | protein_cod  | 0            | UTR3;UTR      | KCNJ12                 | +       | protein_cod  | 0             |
| 842 | chr17 | 21556719  | + | chr17 | 21557917  | + | Y | N | N | Y | N | del_ins_ukrs | na | NHEJ   | intergenic      | AC144838.2,AC14483    | +,+     | pseudogene   | 6740;3829    | intergenic    | AC144838.2,AC144838.3  | +,+     | pseudogene   | 7938;2631     |
| 843 | chr17 | 35250486  | + | chr17 | 35250929  | + | Y | Y | Y | Y | Y | del_ins_ukrs | na | NHEJ   | ncRNA_intr      | RP11-445F12.1         | -       | antisense    | 0            | ncRNA_intr    | RP11-445F12.1          | -       | antisense    | 0             |
| 844 | chr17 | 41383489  | + | chr17 | 41466011  | + | Y | Y | Y | Y | Y | del_ins_ukrs | na | FoSTeS | upstream        | LINC00854             | -       | processed_   | 0            | ncRNA_exo     | LINC00910              | -       | lincRNA      | 0             |
| 845 | chr17 | 41466841  | + | chr17 | 41467031  | + | N | N | N | Y | N | del_ins_ukrs | na | FoSTeS | upstream        | LINC00910             | -       | lincRNA      | 0            | upstream      | LINC00910              | -       | lincRNA      | 0             |
| 846 | chr17 | 47352338  | + | chr17 | 47353126  | + | N | N | N | Y | N | del_ins_ukrs | na | FoSTeS | intergenic      | RP1-62O9.3,ZNF652     | +,+     | processed_   | 16314;14232  | intergenic    | RP1-62O9.3,ZNF652      | +,+     | processed_   | 17102;13444   |
| 847 | chr17 | 51694036  | + | chr17 | 51728488  | + | N | Y | N | N | N | del_ins_ukrs | na | NHEJ   | intergenic      | AC090079.1,RP11-312   | +,+     | miRNA,psel   | 79071;64955  | intergenic    | AC090079.1,RP11-312B   | +,+     | miRNA,psel   | 113523;30503  |
| 848 | chr17 | 54949929  | + | chr17 | 54952295  | + | Y | Y | Y | N | Y | del_ins_ukrs | na | FoSTeS | intergenic      | RNU6-1158P,RP11-67O   | +,+     | snRNA,psel   | 1292;12071   | intergenic    | RNU6-1158P,RP11-67OE   | +,+     | snRNA,psel   | 3688;9705     |
| 849 | chr17 | 57364158  | + | chr17 | 57365707  | + | N | Y | N | N | N | del_ins_ukrs | na | FoSTeS | intergenic      | SNRPGP17,YPEL2        | +,+     | pseudogene   | 5454;44905   | intergenic    | SNRPGP17,YPEL2         | +,+     | pseudogene   | 7003;43356    |
| 850 | chr17 | 57707400  | + | chr17 | 57871185  | + | N | N | N | Y | N | del_ins_ukrs | na | FoSTeS | intronic        | VMP1                  | +       | protein_cod  | 0            | intronic;intr | VMP1                   | +       | protein_cod  | 0             |
| 851 | chr17 | 62986279  | + | chr17 | 62988337  | + | Y | Y | Y | Y | Y | del_ins_ukrs | na | FoSTeS | intergenic      | AMZ2P1,GNA13          | -,-     | pseudogene   | 14585;20554  | intergenic    | AMZ2P1,GNA13           | -,-     | pseudogene   | 16643;18496   |
| 852 | chr18 | 4955592   | + | chr18 | 4955990   | + | Y | Y | Y | Y | Y | del_ins_ukrs | na | NHEJ   | ncRNA_intr      | RP11-172F10.1         | -       | lincRNA      | 0            | ncRNA_intr    | RP11-172F10.1          | -       | lincRNA      | 0             |
| 853 | chr18 | 5209648   | + | chr18 | 5210659   | + | Y | Y | Y | Y | Y | del_ins_ukrs | na | NHEJ   | intergenic      | C18orf42,LINC00667    | +,+     | protein_cod  | 12146;23227  | intergenic    | C18orf42,LINC00667     | +,+     | protein_cod  | 13157;22216   |
| 854 | chr18 | 32530959  | + | chr18 | 32531237  | + | N | N | Y | N | N | del_ins_ukrs | na | NHEJ   | intergenic      | DTNA,MAPRE2           | +,+     | protein_cod  | 59151;25933  | intergenic    | DTNA,MAPRE2            | +,+     | protein_cod  | 59429;25655   |
| 855 | chr18 | 35306060  | + | chr18 | 35306633  | + | Y | Y | Y | Y | Y | del_ins_ukrs | na | NHEJ   | intergenic      | RP11-19F9.1,RP11-68   | +,+     | pseudogene   | 52921;92913  | intergenic    | RP11-19F9.1,RP11-68D   | +,+     | pseudogene   | 54949;92850   |
| 856 | chr18 | 38864784  | + | chr18 | 38868344  | + | N | N | Y | Y | N | del_ins_ukrs | na | NHEJ   | intergenic      | RNU7-145P,RP11-142I   | +,+     | snRNA,lincf  | 811938;18261 | intergenic    | RNU7-145P,RP11-142I2   | +,+     | snRNA,lincf  | 815498;179051 |
| 857 | chr18 | 49196970  | + | chr18 | 49198874  | + | N | N | N | Y | N | del_ins_ukrs | na | FoSTeS | intergenic      | RSL24D1P9,RP11-44C    | +,+     | pseudogene   | 57490;16925  | intergenic    | RSL24D1P9,RP11-440L1   | +,+     | pseudogene   | 59394;15021   |
| 858 | chr18 | 55345792  | + | chr18 | 55346136  | + | Y | N | N | N | N | del_ins_ukrs | na | FoSTeS | ncRNA_intr      | RP11-35G9.3,RP11-35   | +,+     | antisense,ai | 0            | ncRNA_intr    | RP11-35G9.3,RP11-35G1  | +,+     | antisense,ai | 0             |
| 859 | chr18 | 73901668  | + | chr18 | 73902041  | + | Y | Y | Y | Y | Y | del_ins_ukrs | na | NHEJ   | intergenic      | RP11-94B19.6,RP11-94E | +,+     | lincRNA,linc | 11975;19797  | intergenic    | RP11-94B19.6,RP11-94E1 | +,+     | lincRNA,linc | 12348;19424   |
| 860 | chr18 | 74347196  | + | chr18 | 74347998  | + | Y | Y | Y | Y | Y | del_ins_ukrs | na | FoSTeS | ncRNA_intr      | RP11-111H3.3          | -       | lincRNA      | 0            | ncRNA_intr    | RP11-111H3.3           | -       | lincRNA      | 0             |
| 861 | chr18 | 4885732   | + | chr19 | 4885945   | + | N | N | Y | N | N | del_ins_ukrs | na | FoSTeS | intergenic      | AC027319.2,AC02731    | +,+     | miRNA,miR    | 8922;3483    | intergenic    | AC027319.2,AC027319.1  | +,+     | miRNA,miR    | 9135;3270     |
| 862 | chr19 | 15046544  | + | chr19 | 15049144  | + | N | N | N | Y | N | del_ins_ukrs | na | FoSTeS | intergenic      | ORTA15P,ORTC2         | +,+     | pseudogene   | 7708;5757    | intergenic    | ORTA15P,ORTC2          | +,+     | pseudogene   | 10308;3157    |
| 863 | chr19 | 23140801  | + | chr19 | 23142920  | + | Y | Y | Y | Y | Y | del_ins_ukrs | na | FoSTeS | intergenic      | CTD-2579N5.4,ZNF72    | +,+     | pseudogene   | 32452;17469  | intergenic    | CTD-2579N5.4,ZNF728    | +,+     | pseudogene   | 34571;15350   |
| 864 | chr19 | 23506167  | + | chr19 | 23648639  | + | Y | Y | N | N | N | del_ins_ukrs | na | FoSTeS | upstream        | CTB-176F20.3          | +       | antisense    | 0            | intergenic    | VN1R92P,ZNF725P        | +,+     | pseudogene   | 20648;26591   |
| 865 | chr2  | 442188    | + | chr2  | 442361    | + | N | N | N | N | Y | del_ins_ukrs | na | FoSTeS | intergenic      | AC105393.2,AC09332    | +,+     | lincRNA,linc | 19885;48756  | intergenic    | AC105393.2,AC093326.1  | +,+     | lincRNA,linc | 20058;48583   |
| 866 | chr2  | 1723768   | + | chr2  | 1724726   | + | N | N | N | N | Y | del_ins_ukrs | na | FoSTeS | intronic        | PXDN                  | -       | protein_cod  | 0            | intronic      | PXDN                   | -       | protein_cod  | 0             |
| 867 | chr2  | 14531291  | + | chr2  | 14531619  | + | N | Y | N | Y | Y | del_ins_ukrs | na | NHEJ   | ncRNA_intr      | LINC00276             | -       | lincRNA      | 0            | ncRNA_intr    | LINC00276              | -       | lincRNA      | 0             |
| 868 | chr2  | 16406393  | + | chr2  | 16407988  | + | Y | Y | Y | Y | Y | del_ins_ukrs | na | NHEJ   | ncRNA_intr      | AC010745.2            | -       | lincRNA      | 0            | ncRNA_intr    | AC010745.2             | -       | lincRNA      | 0             |
| 869 | chr2  | 19002874  | + | chr2  | 19003392  | + | Y | Y | Y | Y | N | del_ins_ukrs | na | FoSTeS | intergenic      | AC106053.1,AC09259    | +,+     | lincRNA,linc | 33856;164855 | intergenic    | AC106053.1,AC092594.1  | +,+     | lincRNA,linc | 34374;164337  |
| 870 | chr2  | 31725168  | + | chr2  | 31727398  | + | N | N | Y | N | Y | del_ins_ukrs | na | FoSTeS | intergenic      | XDH,SRD5A2            | +,+     | protein_cod  | 87587;22382  | intergenic    | XDH,SRD5A2             | +,+     | protein_cod  | 89817;20152   |
| 871 | chr2  | 51973823  | + | chr2  | 51974241  | + | Y | Y | Y | Y | Y | del_ins_ukrs | na | NHEJ   | ncRNA_intr      | AC007682.1            | +       | lincRNA      | 0            | ncRNA_intr    | AC007682.1             | +       | lincRNA      | 0             |
| 872 | chr2  | 52749686  | + | chr2  | 52785271  | + | Y | Y | Y | Y | Y | del_ins_ukrs | na | NHEJ   | intergenic      | AC139712.4,AC13971    | +,+     | lincRNA,psel | 21796;48100  | intergenic    | AC139712.4,AC139712.1  | +,+     | lincRNA,psel | 57381;12515   |
| 873 | chr2  | 54565493  | + | chr2  | 54567474  | + | Y | Y | Y | Y | Y | del_ins_ukrs | na | NHEJ   | intronic        | C2orf73               | +       | protein_cod  | 0            | intronic      | C2orf73                | +       | protein_cod  | 0             |
| 874 | chr2  | 56652302  | + | chr2  | 56655883  | + | Y | Y | Y | Y | Y | del_ins_ukrs | na | NHEJ   | intergenic      | CDC85A,AC008173       | +,+     | protein_cod  | 38994;325133 | intergenic    | CDC85A,AC008173.1      | +,+     | protein_cod  | 42575;321552  |
| 875 | chr2  | 60302516  | + | chr2  | 23328960  | + | N | N | N | N | Y | del_ins_ukrs | na | NHEJ   | ncRNA_intr      | RP11-44A22.1          | -       | lincRNA      | 0            | ncRNA_exo     | AC0068134.6            | -       | lincRNA      | 0             |
| 876 | chr2  | 76773553  | + | chr2  | 76775453  | + | N | N | Y | Y | N | del_ins_ukrs | na | NHEJ   | intergenic;intr | RN7SKP203,RN7SKP      | -,-     | misc_RNA,r   | 101017;48986 | intergenic;ir | RN7SKP203,RN7SKP16     | -,-     | misc_RNA,r   | 102917;47086  |
| 877 | chr2  | 100103713 | + | chr2  | 100105032 | + | Y | Y | Y | Y | Y | del_ins_ukrs | na | FoSTeS | intronic        | REV1                  | -       | protein_cod  | 0            | intronic      | REV1                   | -       | protein_cod  | 0             |
| 878 | chr2  | 106879557 | + | chr2  | 10688916  | + | Y | Y | Y | Y | Y | del_ins_ukrs | na | NHEJ   | intergenic      | AC092106.1,AC11475    | -,-     | pseudogene   | 9384;25702   | intergenic    | AC092106.1,AC114755.2  | -,-     | pseudogene   | 15743;19343   |
| 879 | chr2  | 124170256 | + | chr2  | 124170587 | + | Y | Y | Y | Y | Y | del_ins_ukrs | na | NHEJ   | intergenic;intr | NCOR1P1,RP13-329D     | -,-     | lincRNA,linc | 339199;30586 | intergenic;ir | NCOR1P1,RP13-329D4     | -,-     | lincRNA,linc | 339530;30255  |
| 880 | chr2  | 130824430 | + | chr2  | 130824860 | + | N | N | N | Y | N | del_ins_ukrs | na | FoSTeS | intergenic      | FAR2P1,POTEF          | -       | pseudogene   | 15726;6678   | intergenic    | FAR2P1,POTEF           | -       | pseudogene   | 16156;6248    |
| 881 | chr2  | 189119619 | + | chr2  | 189120108 | + | Y | N | Y | N | N | del_ins_ukrs | na | FoSTeS | ncRNA_intr      | LINC01090             | -       | lincRNA      | 0            | ncRNA_intr    | LINC01090              | -       | lincRNA      | 0             |
| 882 | chr2  | 189119619 | + | chr2  | 189120983 | + | Y | N | Y | Y | Y | del_ins_ukrs | na | FoSTeS | ncRNA_intr      | LINC01090             | -       | lincRNA      | 0            | ncRNA_intr    | LINC01090              | -       | lincRNA      | 0             |
| 883 | chr2  | 241504580 | + | chr2  | 241505855 | + | Y | Y | Y | Y | Y | del_ins_ukrs | na | NHEJ   | intronic        | ANKMY1                | -       | protein_cod  | 0            | intronic      | RNPEPL1,ANKMY1         | +,+     | protein_cod  | 0             |
| 884 | chr2  | 241781957 | + | chr2  | 241782217 | + | N | N | Y | N | N | del_ins_ukrs | na | FoSTeS | intergenic      | KIF1A,AGXT            | +,+     | protein_cod  | 22232;25939  | intergenic    | KIF1A,AGXT             | +,+     | protein_cod  | 22492;25679   |
| 885 | chr2  | 242506103 | + | chr2  | 242507335 | + | Y | Y | N | Y | Y | del_ins_ukrs | na | NHEJ   | intronic;intr   | BOK                   | +       | protein_cod  | 0            | intronic;intr | BOK                    | +       | protein_cod  | 0             |
| 886 | chr20 | 18190831  | + | chr20 | 18191025  | + | N | N | N | Y | N | del_ins_ukrs | na | FoSTeS | intergenic      | CSRP2BP,RP4-717M2     | +,+     | protein_cod  | 21800;9926   | intergenic    | CSRP2BP,RP4-717M23     | +,+     | protein_cod  | 21994;9732    |
| 887 | chr20 | 26102844  | + | chr20 | 26103502  | + | Y | N | Y | Y | N | del_ins_ukrs | na | NHEJ   | intergenic;intr | NCOR1P1,RP13-329D     | -,-     | pseudogene   | 8180;10679   | intergenic;ir | NCOR1P1,RP13-329D4     | -,-     | pseudogene   | 8838;10021    |
| 888 | chr20 | 26257678  | + | chr20 | 26258265  | + | Y | Y | Y | Y | Y | del_ins_ukrs | na | NHEJ   | intergenic      | MIR663A,NONE          | -,-NONE | processed_   | 25516;NONE   | intergenic    | MIR663A,NONE           | -,-NONE | processed_   | 26103;NONE    |
| 889 | chr20 | 37545036  | + | chr20 | 37545305  | + | Y | Y | Y | Y | N | del_ins_ukrs | na | FoSTeS | intronic        | PPP1R16B              | +       | protein_cod  | 0            | intronic      | PPP1R16B               | +       | protein_cod  | 0             |
| 890 | chr20 | 61724698  | + | chr20 | 61725598  | + | Y | Y | Y | Y | Y | del_ins_ukrs | na | NHEJ   | intergenic      | RP11-305P22.9,HAR1B   | +,+     | lincRNA,linc | 8275;2147    | intergenic    | RP11-305P22.9,HAR1B    | +,+     | lincRNA,linc | 9175;1247     |
| 891 | chr21 | 10945339  | + | chr21 | 11177588  | + | N | N | N | Y | N | del_ins_ukrs | na | FoSTeS | intronic        | TPTE                  | -       | protein_cod  | 0            | ncRNA_intr    | AP003900.6             | +       | lincRNA      | 0             |
| 892 | chr21 | 15460789  | + | chr21 | 15461865  | + | Y | Y | Y | Y | Y | del_ins_ukrs | na | NHEJ   | ncRNA_intr      | AP001347.6            | +       | antisense    | 0            | ncRNA_intr    | AP001347.6             | +       | antisense    | 0             |
| 893 | chr21 | 23654900  | + | chr21 | 23666004  | + | Y | Y | Y | Y |   |              |    |        |                 |                       |         |              |              |               |                        |         |              |               |

|     |      |           |   |      |            |   |     |   |   |   |   |              |    |        |               |                       |   |              |               |               |                        |   |              |               |
|-----|------|-----------|---|------|------------|---|-----|---|---|---|---|--------------|----|--------|---------------|-----------------------|---|--------------|---------------|---------------|------------------------|---|--------------|---------------|
| 919 | chr3 | 129657308 | + | chr3 | 129657873  | + | Y   | Y | Y | Y | Y | del_ins_ukrs | na | FoSteS | intergenic    | TMCC1-AS1,RP11-93K    | + | antisense,ai | 19890;15640   | intergenic    | TMCC1-AS1,RP11-93K2    | + | antisense,ai | 20455;15075   |
| 920 | chr3 | 145644968 | + | chr3 | 145649191  | + | Y   | Y | Y | Y | Y | del_ins_ukrs | na | NHEJ   | intergenic    | RPL21P39,RP11-88H1    | + | pseudogene   | 102442;12731  | intergenic    | RPL21P39,RP11-88H10.   | + | pseudogene   | 106665;8508   |
| 921 | chr3 | 159257021 | + | chr3 | 159257691  | + | Y   | Y | Y | Y | Y | del_ins_ukrs | na | NHEJ   | intronic      | IQCJ-SCHIP1           | + | protein_cod  | 0             | intronic      | IQCJ-SCHIP1            | + | protein_cod  | 0             |
| 922 | chr3 | 178878613 | + | chr3 | 178883884  | + | Y   | Y | Y | Y | Y | del_ins_ukrs | na | NHEJ   | intronic      | PIK3CA                | + | protein_cod  | 0             | intronic      | PIK3CA                 | + | protein_cod  | 0             |
| 923 | chr4 | 19057471  | + | chr4 | 19057970   | + | Y   | Y | Y | Y | N | del_ins_ukrs | na | FoSteS | intergenic;in | RP11-608B3.1,RP11-3   | + | lincRNA,inc  | 566340;116487 | intergenic;ir | RP11-608B3.1,RP11-3J1  | + | lincRNA,inc  | 566839;115988 |
| 924 | chr4 | 61330106  | + | chr4 | 61331187   | + | Y   | Y | Y | Y | N | del_ins_ukrs | na | NHEJ   | intergenic    | RNU6-1325P,AC09506    | + | snRNA,mir    | 630221;199561 | intergenic    | RNU6-1325P,AC095061.   | + | snRNA,mir    | 633302;196480 |
| 925 | chr4 | 65719085  | + | chr4 | 65719550   | + | N   | Y | Y | Y | N | del_ins_ukrs | na | FoSteS | intergenic    | RP11-158016.1,RP11-   | + | pseudogene   | 85470;60914   | intergenic    | RP11-158016.1,RP11-7C  | + | pseudogene   | 85935;60449   |
| 926 | chr4 | 67122068  | + | chr4 | 67123492   | + | Y   | Y | N | Y | N | del_ins_ukrs | na | NHEJ   | intergenic    | RP11-25H12.1,MIR126   | + | lincRNA,mif  | 106338;20474  | intergenic    | RP11-25H12.1,MIR1269   | + | lincRNA,mif  | 107762;19050  |
| 927 | chr4 | 104894046 | + | chr4 | 104894681  | + | Y   | Y | Y | Y | Y | del_ins_ukrs | na | NHEJ   | ncRNA_intr    | RP11-703G6.1          | + | lincRNA      | 0             | ncRNA_intr    | RP11-703G6.1           | + | lincRNA      | 0             |
| 928 | chr4 | 107438051 | + | chr4 | 107438479  | + | N   | N | Y | N | N | del_ins_ukrs | na | FoSteS | intergenic    | RP13-612N21.1,ACTR    | + | lincRNA,ps   | 63446;319604  | intergenic    | RP13-612N21.1,ACTR6F   | + | lincRNA,ps   | 63874;319176  |
| 929 | chr4 | 107438215 | + | chr4 | 107438626  | + | Y   | N | N | N | N | del_ins_ukrs | na | FoSteS | intergenic    | RP13-612N21.1,ACTR    | + | lincRNA,ps   | 63610;319440  | intergenic    | RP13-612N21.1,ACTR6F   | + | lincRNA,ps   | 64021;319029  |
| 930 | chr4 | 120600265 | + | chr4 | 120606568  | + | N   | Y | N | Y | Y | del_ins_ukrs | na | NHEJ   | intergenic    | PDE5A,RP11-236P13.    | + | protein_cod  | 50119;119979  | intergenic    | PDE5A,RP11-236P13.1    | + | protein_cod  | 54622;113676  |
| 931 | chr4 | 134132542 | + | chr4 | 134132765  | + | N   | N | N | Y | N | del_ins_ukrs | na | FoSteS | intergenic    | PCDH10,AC105252.1     | + | protein_cod  | 16777;349469  | intergenic    | PCDH10,AC105252.1      | + | protein_cod  | 17000;349246  |
| 932 | chr4 | 135433002 | + | chr4 | 135435702  | + | Y   | Y | Y | Y | N | del_ins_ukrs | na | NHEJ   | intergenic    | RP11-400D2.3,CTD-20   | + | lincRNA,inc  | 53995;247552  | intergenic    | RP11-400D2.3,CTD-201   | + | lincRNA,inc  | 56695;244852  |
| 933 | chr4 | 152252541 | + | chr4 | 152254130  | + | N   | Y | Y | Y | N | del_ins_ukrs | na | NHEJ   | intergenic    | RNU6-1282P,RP11-73    | + | snRNA,lincf  | 30776;2386    | downstream    | RP11-731D1.4           | + | snRNA,lincf  | 0             |
| 934 | chr4 | 172988639 | + | chr4 | 172992932  | + | Y   | Y | Y | Y | N | del_ins_ukrs | na | NHEJ   | intronic      | GALNTL6               | + | protein_cod  | 0             | intronic      | GALNTL6                | + | protein_cod  | 0             |
| 935 | chr4 | 173425032 | + | chr4 | 173433521  | + | Y   | N | N | Y | Y | del_ins_ukrs | na | NHEJ   | intronic      | GALNTL6               | + | protein_cod  | 0             | intronic      | GALNTL6                | + | protein_cod  | 0             |
| 936 | chr4 | 189445668 | + | chr4 | 189447690  | + | Y   | Y | Y | Y | Y | del_ins_ukrs | na | NHEJ   | ncRNA_intr    | LINC01060             | + | lincRNA      | 0             | ncRNA_intr    | LINC01060              | + | lincRNA      | 0             |
| 937 | chr5 | 1061179   | + | chr5 | 1061639    | + | N   | N | Y | N | N | del_ins_ukrs | na | FoSteS | intronic      | SLC12A7               | + | protein_cod  | 0             | intronic      | SLC12A7                | + | protein_cod  | 0             |
| 938 | chr5 | 2226443   | + | chr5 | 2226966    | + | Y   | N | N | N | N | del_ins_ukrs | na | NHEJ   | intergenic    | Y_RNA,RP11-129I19.2   | + | misc_RNA,l   | 41509;510333  | intergenic    | Y_RNA,RP11-129I19.2    | + | misc_RNA,l   | 42032;509810  |
| 939 | chr5 | 6468227   | + | chr5 | 6477094    | + | Y   | Y | Y | Y | Y | del_ins_ukrs | na | NHEJ   | intronic      | UBE2QL1               | + | protein_cod  | 0             | intronic      | UBE2QL1                | + | protein_cod  | 0             |
| 940 | chr5 | 8694866   | + | chr5 | 8696718    | + | N   | N | N | Y | Y | del_ins_ukrs | na | NHEJ   | intergenic    | RP11-417J1.3,RP11-3'  | + | pseudogene   | 74444;90288   | intergenic    | RP11-417J1.3,RP11-315. | + | pseudogene   | 76296;88436   |
| 941 | chr5 | 16870015  | + | chr5 | 16870736   | + | Y   | N | N | N | N | del_ins_ukrs | na | FoSteS | intronic      | MYO10                 | + | protein_cod  | 0             | intronic      | MYO10                  | + | protein_cod  | 0             |
| 942 | chr5 | 45527116  | + | chr5 | 45527606   | + | N   | N | N | Y | N | del_ins_ukrs | na | FoSteS | intronic      | HGN1                  | + | protein_cod  | 0             | intronic      | HGN1                   | + | protein_cod  | 0             |
| 943 | chr5 | 99400983  | + | chr5 | 99714162   | + | N   | Y | N | N | N | del_ins_ukrs | na | FoSteS | intergenic    | RP11-475J5.5,RNU6-1   | + | pseudogene   | 10234;88393   | intergenic    | RNU6-1119P,RP11-346J'  | + | snRNA,lincf  | 224679;22983  |
| 944 | chr5 | 106324751 | + | chr5 | 106326444  | + | Y   | Y | Y | Y | Y | del_ins_ukrs | na | FoSteS | ncRNA_intr    | CTC-254B4.1           | + | lincRNA      | 0             | ncRNA_intr    | CTC-254B4.1            | + | lincRNA      | 0             |
| 945 | chr5 | 119380146 | + | chr5 | 119382681  | + | Y   | Y | Y | Y | Y | del_ins_ukrs | na | NHEJ   | intergenic    | CTC-507E12.1,CTC-50   | + | pseudogene   | 363371;200997 | intergenic    | CTC-507E12.1,CTC-552I  | + | pseudogene   | 365906;198462 |
| 946 | chr5 | 127336000 | + | chr5 | 127336932  | + | N   | N | N | Y | N | del_ins_ukrs | na | NHEJ   | ncRNA_intr    | CTC-228N24.3          | + | lincRNA      | 0             | ncRNA_intr    | CTC-228N24.3           | + | lincRNA      | 0             |
| 947 | chr5 | 133134678 | + | chr5 | 133136489  | + | Y   | N | N | Y | Y | del_ins_ukrs | na | NHEJ   | intergenic;in | AC005178.1,snoU13     | + | pseudogene   | 78053;51870   | intergenic;ir | AC005178.1,snoU13      | + | pseudogene   | 79864;50059   |
| 948 | chr5 | 135115881 | + | chr5 | 135120406  | + | N   | N | N | Y | N | del_ins_ukrs | na | NHEJ   | intergenic    | AC011431.1,AC01143    | + | pseudogene   | 33836;21037   | intergenic    | AC011431.1,AC011431.2  | + | pseudogene   | 38361;16512   |
| 949 | chr5 | 150203160 | + | chr5 | 150223264  | + | Y   | Y | Y | Y | N | del_ins_ukrs | na | NHEJ   | intergenic    | AC010441.1,IRGM       | + | protein_cod  | 26863;22925   | intergenic    | AC010441.1,IRGM        | + | protein_cod  | 46967;2821    |
| 950 | chr5 | 156848607 | + | chr5 | 156850882  | + | N   | Y | Y | N | Y | del_ins_ukrs | na | FoSteS | ncRNA_intr    | CTB-109A12.1          | + | sense_over   | 0             | ncRNA_intr    | CTB-109A12.1           | + | sense_over   | 0             |
| 951 | chr5 | 162861773 | + | chr5 | 162863292  | + | Y   | Y | Y | Y | Y | del_ins_ukrs | na | FoSteS | ncRNA_intr    | RP11-541P9.3          | + | antisense    | 0             | ncRNA_intr    | RP11-541P9.3           | + | antisense    | 0             |
| 952 | chr6 | 14745281  | + | chr6 | 14745698   | + | Y   | Y | Y | Y | Y | del_ins_ukrs | na | FoSteS | intergenic    | RNU6-793P,RP11-146I   | + | snRNA,lincf  | 98412;231738  | intergenic    | RNU6-793P,RP11-146I2.  | + | snRNA,lincf  | 98829;231321  |
| 953 | chr6 | 47091639  | + | chr6 | 47091992   | + | N   | N | N | Y | N | del_ins_ukrs | na | FoSteS | intergenic    | GPR110,TNFRSF21       | + | protein_cod  | 81540;107629  | intergenic    | GPR110,TNFRSF21        | + | protein_cod  | 81893;107276  |
| 954 | chr6 | 51847696  | + | chr6 | 5101194032 | + | Y   | Y | N | Y | N | del_ins_ukrs | na | NHEJ   | intronic      | PKHD1                 | + | protein_cod  | 0             | intronic      | ASC3                   | + | protein_cod  | 0             |
| 955 | chr6 | 57284911  | + | chr6 | 57289357   | + | Y   | Y | Y | Y | Y | del_ins_ukrs | na | NHEJ   | intronic      | PRIM2                 | + | protein_cod  | 0             | intronic      | PRIM2                  | + | protein_cod  | 0             |
| 956 | chr6 | 57330372  | + | chr6 | 573333072  | + | N   | N | N | N | Y | del_ins_ukrs | na | VNTR   | intergenic    | PRIM2,GAPDHP41        | + | protein_cod  | 19697;153897  | intergenic    | PRIM2,GAPDHP41         | + | protein_cod  | 20462;153132  |
| 957 | chr6 | 63597634  | + | chr6 | 63598986   | + | Y   | Y | Y | Y | Y | del_ins_ukrs | na | NHEJ   | intergenic    | AL121931.1,AL590558.1 | + | miRNA,mir    | 160805;95355  | intergenic    | AL121931.1,AL590558.1  | + | miRNA,mir    | 162157;94003  |
| 958 | chr6 | 67040800  | + | chr6 | 67043190   | + | Y   | Y | Y | Y | Y | del_ins_ukrs | na | FoSteS | intergenic    | NUFIP1P,AC002485.1    | + | pseudogene   | 235998;28518  | intergenic    | NUFIP1P,AC002485.1     | + | pseudogene   | 238388;26128  |
| 959 | chr6 | 73221940  | + | chr6 | 73222766   | + | N   | Y | Y | N | Y | del_ins_ukrs | na | FoSteS | intergenic    | RIMS1,RP11-135M8      | + | protein_cod  | 109095;10403  | intergenic    | RIMS1,RP11-135M8_A.    | + | protein_cod  | 109921;9577   |
| 960 | chr6 | 74932722  | + | chr6 | 74933074   | + | N   | Y | Y | N | N | del_ins_ukrs | na | NHEJ   | ncRNA_intr    | RP11-554D15.1         | + | lincRNA      | 0             | ncRNA_intr    | RP11-554D15.1          | + | lincRNA      | 0             |
| 961 | chr6 | 86623833  | + | chr6 | 86625833   | + | Y   | Y | Y | Y | Y | del_ins_ukrs | na | NHEJ   | intergenic    | RP11-207F8.1,RNU4-1   | + | pseudogene   | 44651;78906   | intergenic    | RP11-207F8.1,RNU4-12f  | + | pseudogene   | 46651;76906   |
| 962 | chr6 | 96853032  | + | chr6 | 96853180   | + | N   | N | N | N | Y | del_ins_ukrs | na | FoSteS | ncRNA_intr    | UFL1-AS1              | + | antisense    | 0             | ncRNA_intr    | UFL1-AS1               | + | antisense    | 0             |
| 963 | chr6 | 98416730  | + | chr6 | 98418538   | + | Y   | Y | Y | Y | Y | del_ins_ukrs | na | NHEJ   | ncRNA_intr    | RP11-436D23.1         | + | lincRNA      | 0             | ncRNA_intr    | RP11-436D23.1          | + | lincRNA      | 0             |
| 964 | chr6 | 100334501 | + | chr6 | 100035322  | + | Y   | Y | Y | Y | Y | del_ins_ukrs | na | NHEJ   | intergenic    | RP1-199J3.5,PRDM13    | + | pseudogene   | 10169;20105   | intergenic    | RP1-199J3.5,PRDM13     | + | pseudogene   | 10990;19284   |
| 965 | chr6 | 103737464 | + | chr6 | 103782980  | + | N   | Y | N | Y | Y | del_ins_ukrs | na | NHEJ   | intergenic    | RP1-76C18.1,SNORA3    | + | pseudogene   | 285692;293546 | intergenic    | RP1-76C18.1,SNORA33    | + | pseudogene   | 311118;268120 |
| 966 | chr6 | 108031342 | + | chr6 | 108032403  | + | Y   | Y | Y | Y | Y | del_ins_ukrs | na | FoSteS | intronic      | SCML4                 | + | protein_cod  | 0             | intronic      | SCML4                  | + | protein_cod  | 0             |
| 967 | chr6 | 153747364 | + | chr6 | 153748554  | + | N   | Y | N | Y | Y | del_ins_ukrs | na | NHEJ   | intergenic;in | RNA5SP225,RP11-33I'   | + | rRNA,pseu    | 5657;239478   | intergenic;ir | RNA5SP225,RP11-331O    | + | rRNA,pseu    | 6847;238288   |
| 968 | chr6 | 160877913 | + | chr6 | 160956049  | + | N   | N | N | Y | N | del_ins_ukrs | na | FoSteS | ncRNA_intr    | LPA2                  | + | pseudogene   | 0             | intronic      | LPA                    | + | protein_cod  | 0             |
| 969 | chr6 | 167488070 | + | chr6 | 167489577  | + | N   | Y | Y | Y | Y | del_ins_ukrs | na | NHEJ   | ncRNA_intr    | RP11-517H2.6          | + | processed_   | 0             | ncRNA_intr    | RP11-517H2.6           | + | processed_   | 0             |
| 970 | chr7 | 151134    | + | chr7 | 160558     | + | Y   | Y | Y | Y | Y | del_ins_ukrs | na | NHEJ   | ncRNA_exo     | AC093627.10           | + | lincRNA      | 0             | intergenic    | AC093627.10,RP11-90P'  | + | lincRNA,inc  | 5093;1207     |
| 971 | chr7 | 151958    | + | chr7 | 160572     | + | N   | N | N | Y | N | del_ins_ukrs | na | FoSteS | ncRNA_exo     | AC093627.10           | + | lincRNA      | 0             | intergenic    | AC093627.10,RP11-90P'  | + | lincRNA,inc  | 5107;1193     |
| 972 | chr7 | 605922    | + | chr7 | 606305     | + | N   | N | N | Y | Y | del_ins_ukrs | na | FoSteS | intronic      | PRKAR1B               | + | protein_cod  | 0             | intronic      | PRKAR1B                | + | protein_cod  | 0             |
| 973 | chr7 | 92980     | + | chr7 | 929611     | + | N   | N | N | Y | N | del_ins_ukrs | na | FoSteS | intronic      | SUN1,GET4             | + | protein_cod  | 0             | intronic      | SUN1,GET4              | + | protein_cod  | 0             |
| 974 | chr7 | 24258087  | + | chr7 | 24258484   | + | Y   | Y | Y | Y | Y | del_ins_ukrs | na | NHEJ   | ncRNA_intr    | AC004485.3            | + | antisense    | 0             | ncRNA_intr    | AC004485.3             | + | antisense    | 0             |
| 975 | chr7 | 35984737  | + | chr7 | 62472988   | + | N   | Y | Y | Y | N | del_ins_ukrs | na | NHEJ   | intergenic    | RNU6-1085P,SEP77P     | + | snRNA,ps     | 14863;1167    | intergenic    | RNU6-417P,RP11-196D1   | + | snRNA,lincf  | 1041;32217    |
| 976 | chr7 | 51594312  | + | chr7 | 51598980   | + | Y   | Y | Y | Y | Y | del_ins_ukrs | na | NHEJ   | intergenic    | CTD-2021A8.3,ROBO2P   | + | pseudogene   | 137501;73670  | intergenic    | CTD-2021A8.3,ROBO2P    | + | pseudogene   | 141879;69292  |
| 977 | chr7 | 52171023  | + | chr7 | 52397345   | + | Y</ |   |   |   |   |              |    |        |               |                       |   |              |               |               |                        |   |              |               |

|      |       |           |   |       |           |   |   |   |   |   |   |              |    |             |                 |                      |        |              |               |               |                       |   |              |               |
|------|-------|-----------|---|-------|-----------|---|---|---|---|---|---|--------------|----|-------------|-----------------|----------------------|--------|--------------|---------------|---------------|-----------------------|---|--------------|---------------|
| 1003 | chr8  | 83005233  | + | chr8  | 83005683  | + | Y | Y | Y | Y | Y | del_ins_ukrs | na | NHEJ        | intergenic      | RP11-354A14.1,RP11-  | +      | lincRNA,linc | 169805;5453   | intergenic    | RP11-354A14.1,RP11-99 | + | lincRNA,linc | 170255;5003   |
| 1004 | chr8  | 127192205 | + | chr8  | 127194572 | + | Y | Y | Y | Y | Y | del_ins_ukrs | na | NHEJ        | intergenic      | RPFL4AP5,RP11-65D    | -      | pseudogene   | 4947;145535   | intergenic    | RPFL4AP5,RP11-65D17   | - | pseudogene   | 7314;143168   |
| 1005 | chr8  | 131850749 | + | chr8  | 131852739 | + | Y | Y | Y | Y | Y | del_ins_ukrs | na | NHEJ        | intronic        | ADCY8                | -      | protein_cod  | 0             | intronic      | ADCY8                 | - | protein_cod  | 0             |
| 1006 | chr8  | 146057716 | + | chr8  | 146057957 | + | N | N | N | N | Y | del_ins_ukrs | na | NHEJ        | intronic        | ZNF7                 | +      | protein_cod  | 0             | intronic      | ZNF7                  | + | protein_cod  | 0             |
| 1007 | chr8  | 146057826 | + | chr8  | 146057959 | + | N | N | N | N | N | del_ins_ukrs | na | NHEJ        | intronic        | ZNF7                 | +      | protein_cod  | 0             | intronic      | ZNF7                  | + | protein_cod  | 0             |
| 1008 | chr9  | 12345338  | + | chr9  | 12346062  | + | Y | Y | Y | Y | Y | del_ins_ukrs | na | NHEJ        | intergenic      | RNU2-47P,TYRP1       | -      | snRNA,prot   | 44887;340101  | intergenic    | RNU2-47P,TYRP1        | - | snRNA,prot   | 45611;339377  |
| 1009 | chr9  | 23362801  | + | chr9  | 23377686  | + | Y | Y | Y | Y | Y | del_ins_ukrs | na | NHEJ        | intergenic      | AL391117.1,SUMO2P2   | +      | miRNA,pse    | 406999;269303 | intergenic    | AL391117.1,SUMO2P2    | + | miRNA,pse    | 424584;254418 |
| 1010 | chr9  | 28047359  | + | chr9  | 28051256  | + | Y | Y | Y | Y | Y | del_ins_ukrs | na | FoStes      | intronic,intr   | LINGO2               | -      | protein_cod  | 0             | intronic,intr | LINGO2                | - | protein_cod  | 0             |
| 1011 | chr9  | 66532439  | + | chr9  | 66533325  | + | Y | Y | Y | Y | Y | del_ins_ukrs | na | FoStes      | ncRNA_intr      | RP11-262H14.3        | -      | lincRNA      | 0             | ncRNA_intr    | RP11-262H14.3         | - | lincRNA      | 0             |
| 1012 | chr9  | 69786760  | + | chr9  | 69787039  | + | N | Y | N | N | N | del_ins_ukrs | na | FoStes      | intergenic      | IGKV1OR-2,AL359955   | -      | IG_V_pseu    | 8717;35090    | intergenic    | IGKV1OR-2,AL359955.1  | - | IG_V_pseu    | 9086;34721    |
| 1013 | chr9  | 114333291 | + | chr9  | 114333884 | + | Y | Y | Y | Y | Y | del_ins_ukrs | na | FoStes      | intronic        | PTGR1,ZNF483         | +      | protein_cod  | 0             | intronic      | PTGR1,ZNF483          | + | protein_cod  | 0             |
| 1014 | chr9  | 136625194 | + | chr9  | 136626268 | + | Y | Y | Y | Y | Y | del_ins_ukrs | na | NHEJ        | intergenic      | SARDH,VAV2           | -      | protein_cod  | 20117;1822    | downstream    | VAV2,AL590710.1       | - | protein_cod  | 0             |
| 1015 | chr9  | 139427524 | + | chr9  | 139427796 | + | Y | Y | Y | Y | Y | del_ins_ukrs | na | NHEJ        | intronic        | NOTCH1               | -      | protein_cod  | 0             | intronic      | NOTCH1                | - | protein_cod  | 0             |
| 1016 | chrX  | 38386504  | + | chrX  | 38387332  | + | Y | Y | Y | Y | Y | del_ins_ukrs | na | NHEJ        | intronic        | TM4SF2               | +      | protein_cod  | 0             | intronic      | TM4SF2                | + | protein_cod  | 0             |
| 1017 | chrX  | 122972807 | + | chrX  | 122973266 | + | N | Y | N | N | N | del_ins_ukrs | na | FoStes      | intergenic      | CHCHD2P1,Y_RNA       | +      | pseudogene   | 53506;18105   | intergenic    | CHCHD2P1,Y_RNA        | + | pseudogene   | 53965;17646   |
| 1018 | chrY  | 13674175  | + | chrY  | 13798170  | + | N | N | Y | Y | N | del_ins_ukrs | na | FoStes      | intergenic      | RP11-295P22.2,RCC2   | -      | pseudogene   | 44262;227583  | intergenic    | RP11-295P22.2,RCC2P1  | - | pseudogene   | 168257;103588 |
| 1019 | chrY  | 28804466  | + | chrY  | 28812570  | + | N | Y | N | N | N | del_ins_ukrs | na | FoStes      | intergenic      | PARP4P1,NONE         | -      | pseudogene   | 23667;NONE    | intergenic    | PARP4P1,NONE          | - | pseudogene   | 31771;NONE    |
| 1020 | chr1  | 226415473 | + | chr11 | 59283672  | + | N | N | N | Y | N | del_inso     | d  | FoStes      | downstream      | MIXL1                | +      | protein_cod  | 0             | downstream    | OR4D9                 | + | protein_cod  | 0             |
| 1021 | chr1  | 3754993   | + | chr11 | 119124249 | + | Y | N | N | N | N | del_inso     | u  | FoStes      | intronic,intr   | CCEP104              | +      | protein_cod  | 0             | intronic,intr | CBL                   | + | protein_cod  | 0             |
| 1022 | chr1  | 247685228 | + | chr11 | 68243429  | + | N | N | N | Y | N | del_inso     | u  | FoStes      | intronic        | GCSAML               | +      | protein_cod  | 0             | intronic      | PPP6R3                | + | protein_cod  | 0             |
| 1023 | chr1  | 46219074  | - | chr12 | 11236776  | + | N | N | N | Y | N | del_inso     | d  | FoStes      | intergenic      | IPPR,RP11-63015.1    | +      | protein_cod  | 2752;27875    | intergenic    | TAS2R64,TAS2R43       | - | pseudogene   | 5006;7110     |
| 1024 | chr1  | 46219185  | - | chr12 | 11236655  | + | Y | N | Y | Y | N | del_inso     | d  | FoStes      | intergenic      | IPPR,RP11-63015.1    | +      | protein_cod  | 2863;27764    | intergenic    | TAS2R64,TAS2R43       | - | pseudogene   | 4885;7231     |
| 1025 | chr1  | 46219230  | - | chr12 | 11236779  | + | N | Y | N | Y | N | del_inso     | d  | FoStes      | intergenic      | IPPR,RP11-63015.1    | +      | protein_cod  | 2908;27719    | intergenic    | TAS2R64,TAS2R43       | - | pseudogene   | 5009;7107     |
| 1026 | chr1  | 12909078  | - | chr15 | 83428548  | + | N | Y | N | Y | N | del_inso     | d  | FoStes      | upstream        | HNRNPCL1             | -      | protein_cod  | 0             | intronic      | FSD2                  | - | protein_cod  | 0             |
| 1027 | chr1  | 17230525  | + | chr15 | 75867613  | - | Y | N | N | Y | Y | del_inso     | u  | FoStes      | downstream      | RP11-108M9.6         | -      | lincRNA      | 0             | ncRNA_intr    | CTD-2323K18.1         | - | processed    | 0             |
| 1028 | chr1  | 53890873  | + | chr17 | 74607011  | + | N | N | N | Y | N | del_inso     | d  | FoStes      | ncRNA_intr      | SLC25A3P1            | -      | pseudogene   | 0             | intergenic    | RP11-666A8.11,ST6GAL  | - | pseudogene   | 15157;13832   |
| 1029 | chr1  | 185025679 | + | chr19 | 45828385  | + | N | Y | N | Y | N | del_inso     | d  | FoStes      | intronic,intr   | RNF2                 | +      | protein_cod  | 0             | intergenic;ir | CKM,RPS16P9           | - | protein_cod  | 2150;7571     |
| 1030 | chr1  | 144042276 | + | chr4  | 142757017 | + | N | N | N | Y | N | del_inso     | d  | FoStes      | ncRNA_intr      | SRGAP2B              | -      | pseudogene   | 0             | intergenic    | IL15,INPP4B           | + | protein_cod  | 101931;187242 |
| 1031 | chr1  | 121214742 | + | chr5  | 49771514  | - | N | N | Y | N | N | del_inso     | u  | FoStes      | intergenic      | AL592494.5,RP11-344  | +      | lincRNA,linc | 9759;21435    | intergenic    | EMB,RP11-269M20.2     | + | protein_cod  | 34313;127549  |
| 1032 | chr1  | 121214967 | + | chr5  | 49771194  | - | N | N | N | Y | N | del_inso     | u  | FoStes      | intergenic;intr | AL592494.5,RP11-344  | +      | lincRNA,linc | 9984;21210    | intergenic;ir | EMB,RP11-269M20.2     | + | protein_cod  | 33993;127869  |
| 1033 | chr1  | 4827759   | + | chr8  | 142837414 | - | N | N | N | N | Y | del_inso     | u  | FoStes      | intronic,intr   | ACJAP1               | +      | protein_cod  | 0             | intergenic;ir | AC138647.1,AC104417.1 | + | protein_cod  | 308577;189446 |
| 1034 | chr1  | 142542550 | + | chrY  | 13447038  | + | N | N | N | N | Y | del_inso     | d  | FoStes      | intergenic      | NONE,RP11-417J8.1    | NONE,+ | NONE,lincR   | NONE;10743    | intergenic    | AC134878.1,DUX4L16    | + | miRNA,pse    | 106405;15556  |
| 1035 | chr10 | 84855768  | + | chr2  | 214602862 | - | N | N | N | N | Y | del_inso     | d  | EA_LTR_LTI  | intergenic      | RNU6-478P,MARK2P1    | -      | lincRNA,pse  | 27941;215616  | intergenic;ir | GPR35,AQP12B          | + | protein_cod  | 32186;12973   |
| 1036 | chr10 | 85222525  | - | chr4  | 4350755   | + | Y | N | N | N | N | del_inso     | d  | FoStes      | intergenic;intr | AL356140.1,RP11-344  | +      | miRNA,linc   | 25640;209637  | intronic,intr | NSG1                  | + | protein_cod  | 0             |
| 1037 | chr11 | 68243301  | - | chr1  | 247685665 | + | N | N | N | Y | N | del_inso     | d  | FoStes      | intronic        | PPP6R3               | +      | protein_cod  | 0             | intronic      | GCSAML                | + | protein_cod  | 0             |
| 1038 | chr11 | 20255079  | + | chr1  | 207991569 | - | N | N | N | Y | N | del_inso     | u  | FoStes      | intergenic      | DBX1,HTATIP2         | +      | protein_cod  | 72920;130152  | ncRNA_intr    | C1orf132              | - | processed    | 0             |
| 1039 | chr11 | 83126620  | + | chr13 | 91319636  | - | N | N | N | Y | N | del_inso     | u  | FoStes      | ncRNA_intr      | RP11-727A23.10       | +      | antisense    | 0             | intergenic    | LINC01049,RNU6-75P    | + | lincRNA,snf  | 132302;114384 |
| 1040 | chr11 | 83126767  | + | chr13 | 91319608  | - | N | N | Y | N | N | del_inso     | u  | FoStes      | ncRNA_intr      | RP11-727A23.10       | +      | antisense    | 0             | intergenic    | LINC01049,RNU6-75P    | + | lincRNA,snf  | 132274;114412 |
| 1041 | chr11 | 14863243  | + | chr14 | 56319805  | - | N | N | Y | Y | N | del_inso     | u  | FoStes      | intronic,intr   | PDE3B                | +      | protein_cod  | 0             | intergenic;ir | LINC00520,RP11-1012E  | + | processed    | 56399;62640   |
| 1042 | chr12 | 11236550  | + | chr1  | 46219466  | - | N | N | Y | N | N | del_inso     | u  | FoStes      | intergenic      | TAS2R64P,TAS2R43     | -      | pseudogene   | 4780;7336     | intergenic    | IPP,RP11-63015.1      | - | protein_cod  | 3144;27483    |
| 1043 | chr12 | 11236583  | + | chr1  | 46219433  | - | Y | Y | Y | Y | N | del_inso     | u  | EA_LTR_LTI  | intergenic      | TAS2R64P,TAS2R43     | -      | pseudogene   | 4813;7303     | intergenic    | IPP,RP11-63015.1      | - | protein_cod  | 3111;27516    |
| 1044 | chr12 | 38592828  | - | chr4  | 190908641 | + | Y | N | N | N | N | del_inso     | d  | FoStes      | intergenic      | RNASP359,TUBB8P1     | +      | rRNA,pseu    | 35511;2540    | intergenic    | TUBB7P,RNA5SP174      | + | pseudogene   | 2615;2752     |
| 1045 | chr12 | 19940304  | + | chr6  | 131013597 | - | N | N | N | N | Y | del_inso     | u  | FoStes      | ncRNA_intr      | RP11-405A12.2        | +      | lincRNA      | 0             | intergenic;ir | Y_RNA,RP11-102N11.1   | + | misc_RNA,l   | 118340;4860   |
| 1046 | chr12 | 43329131  | - | chr7  | 64883534  | + | N | N | N | Y | N | del_inso     | d  | FoStes      | intergenic      | RP11-25115.3,RP11-51 | +      | lincRNA,pse  | 181478;31520  | intergenic    | ZNF92,RP11-667F9.2    | + | protein_cod  | 17496;44450   |
| 1047 | chr13 | 91319330  | - | chr11 | 83126980  | + | N | N | Y | N | N | del_inso     | d  | FoStes      | intergenic      | LINC01049,RNU6-75P   | +      | lincRNA,snf  | 131996;114690 | ncRNA_intr    | RP11-727A23.10        | + | antisense    | 0             |
| 1048 | chr13 | 91319395  | - | chr11 | 83126884  | + | N | N | N | Y | N | del_inso     | d  | FoStes      | intergenic      | LINC01049,RNU6-75P   | +      | lincRNA,snf  | 132061;114625 | ncRNA_intr    | RP11-727A23.10        | + | antisense    | 0             |
| 1049 | chr13 | 60825361  | + | chr2  | 90418228  | - | N | Y | N | N | N | del_inso     | u  | FoStes      | intergenic      | LINC00434,TARDBPP    | +      | lincRNA,pse  | 36281;23549   | intergenic    | AC13612.1,CH17-132F   | + | pseudogene   | 117826;39973  |
| 1050 | chr13 | 67020063  | - | chr5  | 135829403 | + | N | Y | N | N | N | del_inso     | d  | FoStes      | intronic        | PCDH9                | -      | protein_cod  | 0             | ncRNA_intr    | RP11-114H21.2         | + | lincRNA      | 0             |
| 1051 | chr14 | 49640022  | + | chr11 | 25244525  | + | N | N | Y | Y | N | del_inso     | d  | FoStes      | intergenic      | RP11-816J8.1,RP11-3  | +      | lincRNA,pse  | 95799;200662  | intergenic    | RP11-54J7.2,AC015820  | + | pseudogene   | 81956;314299  |
| 1052 | chr14 | 37769602  | + | chr16 | 61709285  | - | Y | N | N | N | N | del_inso     | u  | FoStes      | intronic,intr   | MIPOL1               | +      | protein_cod  | 0             | intergenic;ir | RP11-90K18.1,RP11-51C | - | pseudogene   | 116840;10018  |
| 1053 | chr15 | 75867352  | + | chr1  | 17230809  | + | N | N | Y | N | Y | del_inso     | d  | EA_SINE_SIR | ncRNA_intr      | CTD-2323K18.1        | -      | processed    | 0             | downstream    | RP11-108M9.6          | - | lincRNA      | 0             |
| 1054 | chr15 | 75867613  | + | chr1  | 17230525  | - | N | N | Y | N | N | del_inso     | u  | FoStes      | ncRNA_intr      | CTD-2323K18.1        | -      | processed    | 0             | downstream    | RP11-108M9.6          | - | lincRNA      | 0             |
| 1055 | chr15 | 20452654  | + | chr16 | 33406197  | + | N | Y | N | N | N | del_inso     | d  | FoStes      | ncRNA_intr      | RP11-492D6.3         | -      | pseudogene   | 0             | ncRNA_intr    | RP11-293B20.2         | + | pseudogene   | 0             |
| 1056 | chr15 | 100587454 | + | chr6  | 10927915  | - | N | N | Y | Y | N | del_inso     | u  | FoStes      | intronic        | ADAMTS17             | -      | protein_cod  | 0             | intronic      | SYCP2L,RP11-637019.3  | + | protein_cod  | 0             |
| 1057 | chr15 | 36380904  | + | chr9  | 99002215  | + | N | N | N | N | Y | del_inso     | d  | FoStes      | ncRNA_intr      | RP11-184D12.1        | -      | lincRNA      | 0             | intronic,intr | HSD17B3               | - | protein_cod  | 0             |
| 1058 | chr16 | 34978716  | + | chr14 | 93227423  | + | Y | N | N | N | N | del_inso     | d  | FoStes      | ncRNA_intr      | 5S_RNA               | -      | lincRNA      | 0             | intergenic    | LGMN,GOLGA5           | + | protein_cod  | 12376;33153   |
| 1059 | chr16 | 61079285  | + | chr14 | 37769602  | - | N | N | N | N | Y | del_inso     | u  | FoStes      | intergenic      | RP11-90K18.1,RP11-5  | +      | pseudogene   | 116840;10018  | intronic      | MIPOL1                | + | protein_cod  | 0             |
| 1060 | chr16 | 21835151  | + | chr15 | 22412531  | - | N | Y | N | N | N | del_inso     | u  | FoStes      | intergenic      | RNR3P1,NPIP84        | +      | pseudogene   | 3420;10739    | ncRNA_intr    | RP11-69H14.6          | + | sense_over   | 0             |
| 1061 | chr16 | 33853339  | + | chr19 | 33444599  | - | N | N | N | N | Y | del_inso     | d  | FoStes      | ncRNA_intr      | RP11-598D12.2        | -      | pseudogene   | 0             | exonic,exon   | CEP89                 | - | protein_cod  | 0             |
| 1062 | chr16 | 33962482  | - | chr2  | 133013782 | + | N | Y | N | N | N | del_inso     | d  | FoStes      | ncRNA_exo       | LINC00273            | -      | lincRNA      | 0             | downstream    | MIR663B               | - | miRNA        |               |

|      |        |           |   |       |           |   |   |   |   |   |   |   |          |   |             |                  |                      |     |              |               |               |                        |        |              |               |
|------|--------|-----------|---|-------|-----------|---|---|---|---|---|---|---|----------|---|-------------|------------------|----------------------|-----|--------------|---------------|---------------|------------------------|--------|--------------|---------------|
| 1087 | chr21  | 39080014  | + | chr2  | 237615782 | - | N | N | N | N | Y | N | del_inso | u | FoSteS      | intronic         | KCNJ6                | -   | protein_cod  | 0             | intergenic    | ACKR3,AC011286.1       | +,+    | protein_cod  | 124781;26243  |
| 1088 | chr21  | 11022625  | + | chr22 | 45991810  | - | N | N | N | Y | Y | Y | del_inso | u | FoSteS      | ncRNA_intrn      | BAGE2                | -   | pseudogene   | 0             | intronic      | FBLN1                  | +      | protein_cod  | 0             |
| 1089 | chr21  | 18553575  | - | chr8  | 64238060  | + | N | N | N | N | Y | N | del_inso | d | FoSteS      | intergenic;intrn | AF212831.2,NEK4P1    | -,- | lincRNA,ps   | 307564;29212  | intergenic;ir | RN7SL135P,CTD-3046C    | +      | misc_RNA,I   | 90591;59337   |
| 1090 | chr22  | 28121813  | - | chr16 | 86452837  | + | N | N | Y | N | N | N | del_inso | u | FoSteS      | intergenic       | RP11-375H17.1,MN1    | +,+ | antisense,pr | 4148;22452    | intergenic    | LINC00917,RP11-15813.  | +      | lincRNA,ps   | 69548;15599   |
| 1091 | chr22  | 45991517  | - | chr21 | 11022748  | + | N | Y | N | Y | Y | Y | del_inso | d | FoSteS      | intronic         | FBLN1                | -   | protein_cod  | 0             | ncRNA_intrn   | BAGE2                  | -      | pseudogene   | 0             |
| 1092 | chr22  | 23852560  | + | chr9  | 132186744 | + | N | N | N | N | N | Y | del_inso | u | FoSteS      | intergenic;intrn | AP000345.1,AP00034   | +   | lincRNA,linc | 23393;2121    | intergenic;ir | RP11-65J3,RP11-65J3.   | +      | pseudogene   | 43995;6187    |
| 1093 | chr3   | 73160133  | + | chr11 | 62609281  | - | Y | N | N | N | N | N | del_inso | u | FoSteS      | upstream         | RNU2-64P             | +   | snRNA        | 0             | ncRNA_UTI     | WDR74,RNU2-2P          | -,-    | protein_cod  | 0             |
| 1094 | chr3   | 46877491  | + | chr17 | 41467211  | - | N | N | N | N | Y | N | del_inso | u | FoSteS      | intergenic       | PRSS42,MYL3          | -,- | protein_cod  | 1906;21871    | upstream      | LINC00910              | -      | lincRNA      | 0             |
| 1095 | chr3   | 26470316  | - | chr6  | 77722512  | + | Y | N | N | N | N | N | del_inso | u | FoSteS      | intergenic;intrn | VENTXP4,AC099754.    | +   | pseudogene   | 81187;190505  | intergenic;ir | RP11-354K4.2,HTR1B     | +,+    | lincRNA,prc  | 236935;449436 |
| 1096 | chr4   | 4350423   | + | chr10 | 85222943  | - | Y | N | N | N | N | N | del_inso | u | FoSteS      | intronic         | NSG1                 | +   | protein_cod  | 0             | intergenic    | AL356140.1,RP11-344L1  | +      | miRNA,lincf  | 26058;209219  |
| 1097 | chr4   | 3636135   | + | chr12 | 54478896  | - | Y | N | N | N | N | N | del_inso | u | FoSteS      | downstream       | RP3-368B9.2          | +   | lincRNA      | 0             | ncRNA_intrn   | RP11-834C11.3,RP11-83  | +,+    | lincRNA,linc | 0             |
| 1098 | chr4   | 68150351  | - | chr6  | 160656505 | + | N | N | N | N | Y | N | del_inso | d | FoSteS      | intergenic       | RNU6-699P,RP11-584I  | +,+ | snRNA,lincf  | 387262;132672 | intronic      | SLC22A2                | -      | protein_cod  | 0             |
| 1099 | chr4   | 49268316  | - | chrY  | 13267910  | + | Y | N | N | Y | N | N | del_inso | d | FoSteS      | intergenic       | RP11-1281K21.7,RP11  | +,+ | pseudogene   | 19384;220627  | intergenic    | RP1-85D24.1,AC134878   | +      | pseudogene   | 4347;72449    |
| 1100 | chr5   | 49770934  | - | chr1  | 121215151 | + | N | N | N | Y | N | N | del_inso | d | FoSteS      | intergenic       | EMB,RP11-269M20.2    | +,+ | protein_cod  | 33733;128129  | intergenic    | AL592494.5,RP11-344P1  | +,+    | lincRNA,linc | 10168;21026   |
| 1101 | chr5   | 49770982  | - | chr1  | 121215571 | + | N | N | Y | N | N | N | del_inso | d | FoSteS      | intergenic       | EMB,RP11-269M20.2    | +,+ | protein_cod  | 33781;128081  | intergenic    | AL592494.5,RP11-344P1  | +,+    | lincRNA,linc | 10588;20606   |
| 1102 | chr5   | 35486157  | + | chr13 | 114639942 | - | N | Y | N | N | N | N | del_inso | u | FoSteS      | intergenic       | U3,SPEF2             | +,+ | snoRNA,prc   | 56779;131789  | intergenic    | LINC00565,RASA3        | +      | lincRNA,prc  | 8125;107252   |
| 1103 | chr5   | 175733389 | + | chr18 | 55381820  | - | N | N | N | N | Y | N | del_inso | u | FoSteS      | intronic         | SIMC1                | +   | protein_cod  | 0             | ncRNA_intrn   | RP11-35G9.3,RP11-35G   | +,+    | antisense,ai | 0             |
| 1104 | chr5   | 79074614  | + | chr8  | 92534263  | - | N | Y | N | N | N | N | del_inso | u | FoSteS      | ncRNA_intrn      | CYC431G16.2          | -   | antisense    | 0             | intergenic    | snoU13,RP11-122C21.1   | -      | snoRNA,linc  | 57896;20889   |
| 1105 | chr6   | 10927634  | - | chr15 | 100587624 | + | N | N | N | N | Y | N | del_inso | d | FoSteS      | intronic         | SYCP2L,RP11-637O1    | +,+ | protein_cod  | 0             | intronic      | ADAMTS17               | -      | protein_cod  | 0             |
| 1106 | chr6   | 160656412 | + | chr4  | 68105856  | - | N | N | N | N | Y | N | del_inso | u | FoSteS      | intronic         | SLC22A2              | +   | protein_cod  | 0             | intergenic    | RNU6-699P,RP11-584P2   | +,+    | snRNA,lincf  | 387767;132167 |
| 1107 | chr6   | 144120386 | - | chr7  | 153002453 | + | N | Y | N | N | N | N | del_inso | d | FoSteS      | intronic         | PHACTR2              | +   | protein_cod  | 0             | intergenic    | AC079809.2,AC073236.3  | +      | pseudogene   | 160780;94552  |
| 1108 | chr6   | 63719714  | - | chrX  | 102685593 | + | N | N | Y | N | N | N | del_inso | d | FoSteS      | intergenic       | AL590558.1,RP11-184  | -,- | miRNA,ps     | 26639;183263  | intergenic    | NGFRAP1,LL0XNC01-2E    | +,+    | protein_cod  | 52588;66858   |
| 1109 | chr6   | 63719768  | - | chrX  | 102685505 | + | N | N | N | Y | N | N | del_inso | d | FoSteS      | intergenic       | AL590558.1,RP11-184  | -,- | miRNA,ps     | 26693;183209  | intergenic    | NGFRAP1,LL0XNC01-2E    | +,+    | protein_cod  | 52500;66946   |
| 1110 | chr7   | 64883044  | + | chr12 | 43292316  | - | N | N | Y | N | N | N | del_inso | u | FoSteS      | intergenic       | ZNF92,RP11-667F9.2   | +,+ | protein_cod  | 17006;44940   | intergenic    | RP11-251I5.3,RP11-510F | +,+    | lincRNA,ps   | 181663;31335  |
| 1111 | chr7   | 63971332  | - | chr18 | 77780755  | + | N | Y | N | N | N | N | del_inso | u | FoSteS      | intergenic       | HNRNPCC7,ZNF680      | +,+ | pseudogene   | 9225;8930     | intronic      | TXNL4A                 | -      | protein_cod  | 0             |
| 1112 | chr7   | 64289907  | - | chr19 | 22314335  | + | N | N | Y | N | N | N | del_inso | u | FoSteS      | intronic         | ZNF138               | +   | protein_cod  | 0             | ncRNA_intrn   | ZNF92P2                | -      | pseudogene   | 0             |
| 1113 | chr7   | 153002421 | + | chr6  | 144120580 | - | N | Y | N | N | N | N | del_inso | u | FoSteS      | intergenic       | AC079809.2,AC07323   | +,+ | pseudogene   | 160748;94584  | intronic      | PHACTR2                | +      | protein_cod  | 0             |
| 1114 | chr8   | 11098805  | + | chr18 | 22222917  | - | N | Y | N | N | N | N | del_inso | u | FoSteS      | intergenic       | AF131215.8,LINC00552 | -,- | lincRNA,linc | 37625;6330    | ncRNA_intrn   | RP11-449D8.1           | +      | lincRNA      | 0             |
| 1115 | chr8   | 21625055  | + | chr21 | 47056645  | - | N | N | N | N | Y | N | del_inso | u | FoSteS      | intronic         | GFR42                | +   | protein_cod  | 0             | intergenic    | AL133493.2,PCBP3       | +,+    | lincRNA,prc  | 39640;6963    |
| 1116 | chr8   | 52070925  | - | chr5  | 149050933 | + | N | Y | N | N | N | N | del_inso | u | FoSteS      | intergenic       | SNORA7,RP11-401H2    | +,+ | snoRNA,anl   | 143200;99323  | intergenic    | ARHGGEF37,U3           | +,+    | protein_cod  | 36402;24379   |
| 1117 | chr8   | 78523813  | + | chr10 | 30078318  | - | N | Y | N | N | N | N | del_inso | u | FoSteS      | intronic         | PCSK5                | +   | protein_cod  | 0             | intergenic    | SVIL,RP11-224P11.1     | +,+    | protein_cod  | 53585;101643  |
| 1118 | chr9   | 5904463   | + | chr15 | 60537867  | - | N | N | N | N | Y | N | del_inso | u | FoSteS      | intronic         | MLANA,KIAA2026       | +,+ | protein_cod  | 0             | intergenic    | RP11-82L7.4,ANXA2      | -,-    | lincRNA,prc  | 127348;101466 |
| 1119 | chr9   | 68492016  | + | chr4  | 190819465 | - | N | N | N | Y | N | N | del_inso | u | FoSteS      | intergenic       | RP11-764K9.4,CR786   | +,+ | pseudogene   | 36641;20330   | ncRNA_intrn   | AF146191.4             | -      | lincRNA      | 0             |
| 1120 | chr9   | 88668615  | + | chr8  | 83029872  | - | N | N | N | Y | Y | N | del_inso | u | FoSteS      | intronic         | GOLM1                | +   | protein_cod  | 0             | ncRNA_intrn   | RP11-99H20.1           | -      | lincRNA      | 0             |
| 1121 | chr9   | 88805946  | + | chrX  | 74928565  | - | N | N | N | Y | Y | N | del_inso | u | FoSteS      | intergenic       | RP11-379P1.4,C9orf1  | +,+ | pseudogene   | 58180;29234   | intergenic    | BRAFP1,TTC3P1          | +,+    | pseudogene   | 123317;31883  |
| 1122 | chr9   | 88806122  | + | chrX  | 74928698  | - | N | Y | N | N | N | N | del_inso | u | FoSteS      | intergenic       | RP11-379P1.4,C9orf1  | +,+ | pseudogene   | 58356;29058   | intergenic    | BRAFP1,TTC3P1          | +,+    | pseudogene   | 123357;31843  |
| 1123 | chr9   | 68393475  | - | chrY  | 9945989   | + | Y | N | N | N | N | N | del_inso | d | FoSteS      | intergenic       | PTGER4P3,RP11-764I   | +,+ | pseudogene   | 21598;4403    | intergenic    | RNA5SP519,AC006987.I   | +      | rRNA,ps      | 15387;61408   |
| 1124 | chr9   | 68404572  | - | chrY  | 9949363   | + | N | Y | N | N | N | N | del_inso | d | complex_cor | ncRNA_intrn      | RP11-764K9.1         | -   | lincRNA      | 0             | intergenic    | RNA5SP519,AC006987.I   | -      | rRNA,ps      | 4361;72434    |
| 1125 | chrX   | 53604462  | - | chr19 | 24027922  | + | N | Y | N | N | N | N | del_inso | d | FoSteS      | intronic         | HUWE1                | -   | protein_cod  | 0             | ncRNA_intrn   | RP11-255H23.4          | -      | lincRNA      | 0             |
| 1126 | chrX   | 81651235  | + | chr20 | 11281584  | + | Y | N | N | Y | Y | Y | del_inso | u | EA_SINE_LIN | intergenic       | RNU6-974P,RP4-581F   | -   | snRNA,ps     | 394459;101883 | ncRNA_intrn   | RP4-734C18.1           | -      | lincRNA      | 0             |
| 1127 | chrX   | 102685356 | + | chr6  | 63720560  | - | N | N | Y | Y | N | N | del_inso | u | FoSteS      | intergenic       | NGFRAP1,LL0XNC01-    | +,+ | protein_cod  | 0             | intergenic    | AL590558.1,RP11-184C   | -,-    | miRNA,ps     | 27485;182417  |
| 1128 | chrX   | 65296781  | - | chr9  | 130644826 | + | N | N | Y | Y | N | N | del_inso | u | FoSteS      | upstream         | E1F4BP9              | +   | pseudogene   | 0             | ncRNA_intrn   | RP11-203J24.9          | -      | processed_   | 0             |
| 1129 | chrX   | 3351397   | + | chrY  | 7431244   | - | N | Y | Y | Y | Y | Y | del_inso | u | FoSteS      | intergenic       | ASS1P4,SNORA48       | +,+ | pseudogene   | 64974;98761   | intergenic    | RNU6-521P,RBMY2HP      | -,-    | snRNA,ps     | 140045;108540 |
| 1130 | chrY   | 13447010  | + | chr1  | 142534016 | - | N | N | N | N | Y | Y | del_inso | u | FoSteS      | intergenic       | AC134878.1,DUX4L16   | +,+ | miRNA,ps     | 106377;15584  | intergenic    | NONE,RP11-417J8.1      | NONE,+ | NONE,linc    | NONE;10277    |
| 1131 | chrY   | 9962124   | + | chr19 | 58322839  | - | Y | N | N | N | N | N | del_inso | u | FoSteS      | intergenic       | RNA5SP519,AC00698    | +,+ | rRNA,ps      | 31522;45273   | intronic      | ZNF586,ZNF552          | -      | protein_cod  | 0             |
| 1132 | chrY   | 10033577  | + | chr2  | 133015079 | + | N | N | N | Y | N | N | del_inso | u | FoSteS      | upstream         | AC010970.1           | +   | miRNA        | 0             | upstream      | MIR663B                | -      | miRNA        | 0             |
| 1133 | chrY   | 10033277  | + | chr2  | 133015917 | - | N | N | N | N | Y | Y | del_inso | u | FoSteS      | upstream         | AC010970.1           | +   | miRNA        | 0             | intergenic    | MIR663B,CDC27P1        | +,+    | miRNA,ps     | 1264;3984     |
| 1134 | chrY   | 13267574  | + | chr4  | 49268622  | - | Y | N | N | N | N | N | del_inso | u | FoSteS      | intergenic       | RP11-85D24.1,AC1348  | -,- | pseudogene   | 4011;72785    | intergenic    | RP11-1281K21.7,RP11-2  | +,+    | pseudogene   | 19690;220321  |
| 1135 | chrY   | 9929993   | + | chr9  | 68409382  | - | Y | N | N | N | N | N | del_inso | u | FoSteS      | downstream       | RNA5SP519            | -   | rRNA         | 0             | ncRNA_intrn   | RP11-764K9.1           | -      | lincRNA      | 0             |
| 1136 | chrY   | 9930452   | + | chr9  | 68409117  | - | Y | N | N | N | N | N | del_inso | u | complex_cor | downstream       | RNA5SP519            | -   | rRNA         | 0             | ncRNA_intrn   | RP11-764K9.1           | -      | lincRNA      | 0             |
| 1137 | chrY   | 7430757   | + | chrX  | 33511778  | + | N | N | N | N | Y | N | del_inso | d | FoSteS      | intergenic       | RNU6-521P,RBMY2HF    | -,- | snRNA,ps     | 139558;109027 | intergenic    | ASS1P4,SNORA48         | +,+    | pseudogene   | 65355;98380   |
| 1138 | chrY   | 7430761   | - | chrX  | 3351822   | + | N | N | Y | N | N | N | del_inso | d | FoSteS      | intergenic       | RNU6-521P,RBMY2HF    | -,- | snRNA,ps     | 139562;109023 | intergenic    | ASS1P4,SNORA48         | +,+    | pseudogene   | 65399;98336   |
| 1139 | chrY   | 7430767   | - | chrX  | 3351738   | + | N | N | N | Y | N | N | del_inso | d | FoSteS      | intergenic       | RNU6-521P,RBMY2HF    | -,- | snRNA,ps     | 139568;109017 | intergenic    | ASS1P4,SNORA48         | +,+    | pseudogene   | 65315;98420   |
| 1140 | chr1   | 167175202 | - | chr1  | 113206276 | + | N | N | Y | N | N | N | del_inso | d | FoSteS      | intergenic       | RP11-277B15.2,RP11-  | +,+ | antisense,ai | 10173;13866   | intronic      | CAPZA1                 | +      | protein_cod  | 0             |
| 1141 | chr1   | 181044092 | - | chr1  | 181043901 | + | N | Y | Y | N | N | N | del_inso | d | FoSteS      | intergenic;intrn | RP11-445P19.3,RP11-  | +,+ | lincRNA,ps   | 13018;13546   | intergenic;ir | MR1,IER5               | +      | protein_cod  | 12827;13737   |
| 1142 | chr1   | 187466731 | + | chr1  | 187466474 | + | N | Y | Y | N | N | N | del_inso | d | FoSteS      | intergenic;intrn | RP11-445P19.3,RP11-  | +,+ | lincRNA,ps   | 16985;9239    | intergenic;ir | RP11-445P19.3,RP11-44  | +,+    | lincRNA,ps   | 16728;9496    |
| 1143 | chr1   | 111106753 | + | chr1  | 181869288 | - | N | Y | Y | N | N | N | del_inso | u | FoSteS      | intergenic       | KCNA10,KCNA2         | +,+ | protein_cod  | 44956;29449   | intergenic    | RN7SKP229,ZNF648       | -,-    | misc_RNA,i   | 60379;154417  |
| 1144 | chr1</ |           |   |       |           |   |   |   |   |   |   |   |          |   |             |                  |                      |     |              |               |               |                        |        |              |               |

|      |       |           |   |       |           |   |   |   |   |   |   |   |          |   |          |                                |                      |             |              |               |                      |                       |              |               |               |
|------|-------|-----------|---|-------|-----------|---|---|---|---|---|---|---|----------|---|----------|--------------------------------|----------------------|-------------|--------------|---------------|----------------------|-----------------------|--------------|---------------|---------------|
| 1171 | chr21 | 23626205  | + | chr21 | 29293556  | - | N | Y | N | Y | N | N | del_insd | u | FoSteS   | ncRNA_intrnAP000705.7          | +                    | lincRNA     | 0            | intergenic    | LINC00113,AJ006995.3 | ++                    | lincRNA,linc | 170004;33684  |               |
| 1172 | chr4  | 163578994 | + | chr4  | 163578943 | + | N | N | N | N | Y | N | del_insd | d | FoSteS   | intergenic                     | TOMM22P4,AC005150    | ++          | pseudogene   | 135801;82826  | intergenic           | TOMM22P4,AC005150.1   | ++           | pseudogene    | 135750;82877  |
| 1173 | chr4  | 187245816 | - | chr4  | 185911516 | + | N | N | Y | N | N | N | del_insd | d | FoSteS   | ncRNA_intrnF11-AS1             | -                    | antisense   | 0            | ncRNA_intrn   | RP11-386B13.4        | +                     | lincRNA      | 0             |               |
| 1174 | chr4  | 78905965  | + | chr4  | 190684480 | - | N | N | Y | N | N | N | del_insd | u | FoSteS   | intergenic;inHMGBI1P44,HNRNP1  | +-                   | pseudogene  | 20300;3049   | intergenic;ir | RNU1-51P,AF146191.4  | -                     | snRNA,lincf  | 53612;17010   |               |
| 1175 | chr4  | 163578583 | + | chr4  | 163579619 | - | N | N | N | N | Y | N | del_insd | u | FoSteS   | intergenic;inTOMM22P4,AC005150 | ++                   | pseudogene  | 135390;83237 | intergenic;ir | TOMM22P4,AC005150.1  | ++                    | pseudogene   | 136426;82201  |               |
| 1176 | chr5  | 28934874  | + | chr5  | 28932852  | + | Y | Y | Y | Y | Y | Y | del_insd | u | FoSteS   | intergenic                     | LSP1P3,SUCLG2P4      | ++          | pseudogene   | 7178;66993    | intergenic           | LSP1P3,SUCLG2P4       | ++           | pseudogene    | 5156;69015    |
| 1177 | chr5  | 28932650  | + | chr5  | 28935058  | - | Y | Y | Y | Y | Y | Y | del_insd | u | FoSteS   | intergenic                     | LSP1P3,SUCLG2P4      | ++          | pseudogene   | 4954;69217    | intergenic           | LSP1P3,SUCLG2P4       | ++           | pseudogene    | 7362;66809    |
| 1178 | chr6  | 131884928 | - | chr6  | 131884765 | + | N | N | N | N | Y | N | del_insd | d | FoSteS   | intergenic                     | RPL21P67,ARG1        | ++          | pseudogene   | 94252;9356    | intergenic           | RPL21P67,ARG1         | ++           | pseudogene    | 94089;9519    |
| 1179 | chr6  | 161206729 | - | chr6  | 153749313 | + | Y | Y | Y | Y | Y | Y | del_insd | d | FoSteS   | intergenic                     | PLG,RP11-235G24.1    | +-          | protein_cod  | 32391;87191   | intergenic           | RNA5SP225,RP11-331O   | ++           | rRNA,pseuc    | 7606;237529   |
| 1180 | chr6  | 131884281 | + | chr6  | 131885007 | - | N | N | N | N | Y | N | del_insd | u | FoSteS   | intergenic                     | RPL21P67,ARG1        | ++          | pseudogene   | 93605;10003   | intergenic           | RPL21P67,ARG1         | ++           | pseudogene    | 94331;9277    |
| 1181 | chr6  | 153749250 | + | chr6  | 161206937 | - | Y | Y | Y | Y | Y | Y | del_insd | u | FoSteS   | intergenic                     | RNA5SP225,RP11-33'   | ++          | rRNA,pseuc   | 7543;237592   | intergenic           | PLG,RP11-235G24.1     | +-           | protein_cod   | 32599;86983   |
| 1182 | chr7  | 142183747 | - | chr7  | 142045948 | + | N | Y | Y | N | N | Y | del_insd | d | FoSteS   | intergenic;inTRBV6-5,TRBV12-2  | -                    | TR_V_gene   | 2731;6891    | downstream    | TRBV4-2              | +                     | TR_V_gene    | 0             |               |
| 1183 | chr7  | 142183781 | - | chr7  | 142045948 | + | Y | N | N | Y | N | N | del_insd | d | FoSteS   | intergenic                     | TRBV6-5,TRBV12-2     | -           | TR_V_gene    | 2765;6857     | downstream           | TRBV4-2               | +            | TR_V_gene     | 0             |
| 1184 | chr7  | 147571592 | - | chr7  | 142662610 | + | N | N | N | N | Y | N | del_insd | u | FoSteS   | intronic;intrCNTNAP2           | +                    | protein_cod | 0            | ncRNA_intrn   | POT1-AS1             | +                     | antisense    | 0             |               |
| 1185 | chr7  | 142662180 | + | chr7  | 142671853 | - | N | N | N | N | Y | N | del_insd | u | FoSteS   | ncRNA_intrn                    | POT1-AS1             | +           | antisense    | 0             | intronic             | CNTNAP2               | +            | protein_cod   | 0             |
| 1186 | chr7  | 134506328 | + | chr7  | 134520884 | - | Y | N | N | N | Y | N | del_insd | u | FoSteS   | intronic                       | CALD1                | +           | protein_cod  | 0             | intronic             | CALD1                 | +            | protein_cod   | 0             |
| 1187 | chr7  | 142031064 | + | chr7  | 142247782 | - | N | N | N | Y | N | Y | del_insd | u | FoSteS   | upstream                       | TRBV7-1              | +           | TR_V_gene    | 0             | upstream             | TRBV7-3               | -            | TR_V_gene     | 0             |
| 1188 | chr7  | 142031256 | + | chr7  | 142247774 | - | Y | N | Y | N | N | N | del_insd | u | FoSteS   | upstream                       | TRBV7-1              | +           | TR_V_gene    | 0             | upstream             | TRBV7-3               | -            | TR_V_gene     | 0             |
| 1189 | chr7  | 142031825 | + | chr7  | 142247724 | - | N | Y | N | N | N | N | del_insd | u | FoSteS   | upstream                       | TRBV7-1              | +           | TR_V_gene    | 0             | upstream             | TRBV7-3               | -            | TR_V_gene     | 0             |
| 1190 | chr8  | 71767847  | + | chr8  | 68667795  | + | N | Y | N | N | N | N | del_insd | u | FoSteS   | intergenic                     | Y_RNA,RP11-326E22.   | +-          | misc_RNA,i   | 74604;299845  | intergenic           | CPA6,NDUFS5P6         | +-           | misc_RNA,i    | 9175;93484    |
| 1191 | chr8  | 68667234  | + | chr8  | 71768278  | - | N | Y | N | N | N | N | del_insd | u | FoSteS   | intergenic                     | CPA6,NDUFS5P6        | +-          | misc_RNA,i   | 8614;94045    | intergenic           | Y_RNA,RP11-326E22.1   | +-           | misc_RNA,i    | 75035;299414  |
| 1192 | chrX  | 51965760  | + | chrX  | 51279906  | + | N | N | N | Y | Y | Y | del_insd | u | FoSteS   | intergenic                     | RP11-363G10.2,XAGE   | ++          | protein_cod  | 19402;146413  | intergenic           | RP11-56H2.2,CENPV3    | +-           | lincRNA,ps    | 26049;81055   |
| 1193 | chrX  | 51279613  | + | chrX  | 51967001  | - | N | N | N | Y | N | N | del_insd | u | FoSteS   | intergenic                     | RP11-56H2.2,CENPVF   | +-          | lincRNA,ps   | 25756;81348   | intergenic           | RP11-363G10.2,XAGE2E  | +-           | protein_cod   | 19643;146172  |
| 1194 | chrX  | 51279828  | + | chrX  | 51965915  | - | N | N | N | N | Y | Y | del_insd | u | FoSteS   | intergenic                     | RP11-56H2.2,CENPVF   | +-          | lincRNA,ps   | 25971;81133   | intergenic           | RP11-363G10.2,XAGE2E  | +-           | protein_cod   | 19557;146258  |
| 1195 | chrX  | 6507257   | - | chr1  | 17027918  | - | N | N | N | N | Y | Y | del_insd | u | FoSteS   | intronic                       | ESPN                 | +           | pseudogene   | 0             | ncRNA_intrn          | ESPN                  | +            | pseudogene    | 0             |
| 1196 | chr1  | 105412504 | - | chr1  | 219161902 | + | N | N | N | N | Y | Y | del_insd | u | FoSteS   | intergenic                     | FTLPT17,RP11-414B7.1 | +-          | pseudogene   | 716052;564112 | intergenic           | RP11-412H9.2,RP11-135 | -            | lincRNA,ant   | 72376;98042   |
| 1197 | chr1  | 113206277 | - | chr1  | 167175201 | + | Y | Y | N | N | N | N | del_insd | u | FoSteS   | intronic                       | CAPZA2               | +           | protein_cod  | 0             | intergenic           | RP11-277B15.2,RP11-27 | -            | antisense,ai  | 10172;13867   |
| 1198 | chr1  | 114645953 | - | chr1  | 114654366 | + | Y | Y | Y | Y | Y | Y | del_insd | u | FoSteS   | intronic                       | SYT6                 | -           | protein_cod  | 0             | intronic             | SYT6                  | -            | protein_cod   | 0             |
| 1199 | chr1  | 12950025  | + | chr1  | 12909375  | - | N | N | N | N | Y | Y | del_insd | u | FoSteS   | intergenic                     | PRAMEF4,PRAMEF1C     | -           | protein_cod  | 4000;2702     | upstream             | HNRNPCL1              | -            | protein_cod   | 0             |
| 1200 | chr1  | 114654350 | + | chr1  | 114646029 | - | Y | Y | Y | Y | Y | Y | del_insd | u | FoSteS   | intronic                       | SYT6                 | -           | protein_cod  | 0             | intronic             | SYT6                  | -            | protein_cod   | 0             |
| 1201 | chr1  | 147394544 | + | chr1  | 145833078 | - | N | N | N | N | Y | N | del_insd | u | FoSteS   | intergenic                     | GJA8,GPR89B          | ++          | protein_cod  | 13151;5962    | ncRNA_exo            | W12-925H4.1           | +            | antisense     | 0             |
| 1202 | chr1  | 187106943 | + | chr1  | 185963183 | - | N | N | N | N | Y | Y | del_insd | u | FoSteS   | ncRNA_intrn                    | LINC01036            | +           | lincRNA      | 0             | intronic             | HMCN1                 | +            | protein_cod   | 0             |
| 1203 | chr10 | 47022999  | - | chr10 | 47059398  | + | N | N | N | N | Y | Y | del_insd | u | FoSteS   | ncRNA_intrn                    | LINC00842            | -           | lincRNA      | 0             | ncRNA_intrn          | LINC00842             | -            | lincRNA       | 0             |
| 1204 | chr10 | 127190418 | - | chr10 | 127201102 | + | Y | N | Y | Y | Y | Y | del_insd | u | FoSteS   | intergenic                     | RPS27P18,TEX36-AS    | +-          | pseudogene   | 27917;72522   | intergenic           | RPS27P18,TEX36-AS1    | +-           | pseudogene    | 38601;61838   |
| 1205 | chr10 | 47059608  | + | chr10 | 47023309  | - | N | N | N | N | Y | Y | del_insd | u | FoSteS   | ncRNA_intrn                    | LINC00842            | -           | lincRNA      | 0             | ncRNA_intrn          | LINC00842             | -            | lincRNA       | 0             |
| 1206 | chr10 | 127197223 | + | chr10 | 127190677 | - | Y | N | Y | Y | Y | Y | del_insd | u | FoSteS   | intergenic                     | RPS27P18,TEX36-AS    | +-          | pseudogene   | 34722;65717   | intergenic           | RPS27P18,TEX36-AS1    | +-           | pseudogene    | 28176;72263   |
| 1207 | chr11 | 7122794   | - | chr11 | 68824896  | + | N | N | N | N | Y | Y | del_insd | u | FoSteS   | intergenic                     | KRTAP5-6,IFITM10     | +-          | protein_cod  | 3809;30846    | ncRNA_intrn          | RP11-554A11.9,RP11-55 | +-           | antisense,lir | 0             |
| 1208 | chr11 | 90421439  | + | chr11 | 91809130  | + | N | N | N | Y | N | N | del_insd | u | FoSteS   | ncRNA_intrn                    | DISC1FP1             | +           | processed_   | 125379;85693  | ncRNA_intrn          | TUBB4BP4,RPL7AP57     | +            | processed_    | 125930;85142  |
| 1209 | chr11 | 91808579  | + | chr11 | 90422128  | - | N | N | N | Y | N | N | del_insd | u | FoSteS   | intergenic                     | TUBB4BP4,RPL7AP57    | +           | processed_   | 0             | intergenic;ir        | TUBB4BP4,RPL7AP57     | +            | processed_    | 0             |
| 1210 | chr11 | 99691307  | + | chr11 | 99690483  | - | Y | N | Y | N | N | N | del_insd | u | FoSteS   | intronic                       | CNTN5                | +           | protein_cod  | 0             | exonic               | CNTN5                 | +            | protein_cod   | 0             |
| 1211 | chr11 | 100349339 | + | chr11 | 98146224  | - | N | N | N | Y | N | Y | del_insd | u | FoSteS   | intergenic                     | CNTN5,RN7SL222P      | +-          | protein_cod  | 119723;163370 | intergenic           | RP11-684B20.1,CTD-234 | +-           | pseudogene    | 144298;289580 |
| 1212 | chr12 | 9722827   | - | chr12 | 31271917  | + | N | N | N | N | Y | Y | del_insd | u | FoSteS   | ncRNA_intrn                    | RP11-726G1.1         | +           | pseudogene   | 0             | ncRNA_exo            | RP11-551L14.1         | +            | pseudogene    | 0             |
| 1213 | chr12 | 25956127  | - | chr12 | 125801148 | + | Y | Y | N | N | N | N | del_insd | u | FoSteS   | ncRNA_intrn                    | RP11-443N24.2        | -           | lincRNA      | 0             | intergenic;ir        | NONE,TMEM132B         | NONE,+       | NONE,prote    | NONE;10014    |
| 1214 | chr12 | 30501742  | + | chr12 | 30440407  | - | N | N | N | N | Y | Y | del_insd | u | FoSteS   | intergenic                     | RP11-155I9.1,RP11-77 | ++          | lincRNA,ps   | 27192;106110  | ncRNA_intrn          | RP11-776A13.3         | -            | lincRNA       | 0             |
| 1215 | chr14 | 21331497  | + | chr14 | 22226998  | + | N | N | Y | N | N | N | del_insd | u | FoSteS   | intergenic                     | RNASE1,RP11-219E7.   | +-          | protein_cod  | 60060;6940    | intergenic           | RPL4P1,TRAV6          | ++           | pseudogene    | 7168;9731     |
| 1216 | chr15 | 41864762  | + | chr15 | 75552165  | + | Y | N | N | N | N | N | del_insd | u | FoSteS   | exonic;exon                    | TYRO3                | -           | protein_cod  | 0             | ncRNA_exo            | TYRO3P                | -            | pseudogene    | 0             |
| 1217 | chr15 | 52264998  | + | chr15 | 52264395  | - | Y | N | N | N | N | N | del_insd | u | FoSteS   | upstream                       | LEO1                 | +           | protein_cod  | 0             | upstream             | LEO1                  | +            | protein_cod   | 0             |
| 1218 | chr16 | 85189757  | + | chr16 | 85188795  | - | N | N | N | Y | N | N | del_insd | u | FoSteS   | intergenic                     | FAM92B,CTC-786C10    | +-          | protein_cod  | 43643;15125   | intergenic           | FAM92B,CTC-786C10.1   | +-           | protein_cod   | 42681;16087   |
| 1219 | chr16 | 16015207  | + | chr19 | 15822401  | - | N | N | N | N | Y | Y | del_insd | u | LINE_com | intergenic                     | AC005336.5,AC00533   | +           | pseudogene   | 1159;6185     | intergenic           | CYP4F12,OR10H2        | ++           | protein_cod   | 14417;16433   |
| 1220 | chr4  | 3931305   | + | chr4  | 4005427   | + | N | N | Y | N | N | N | del_insd | u | FoSteS   | ncRNA_intrn                    | AC226119.5           | -           | processed_   | 0             | intergenic           | ENPP7P9,AC116562.2    | +-           | pseudogene    | 36040;33384   |
| 1221 | chr4  | 4005243   | + | chr4  | 3931747   | - | N | N | Y | N | N | N | del_insd | u | FoSteS   | intergenic                     | ENPP7P9,AC116562.2   | +-          | pseudogene   | 35856;33568   | ncRNA_intrn          | AC226119.5            | -            | processed_    | 0             |
| 1222 | chr4  | 28960170  | + | chr4  | 28857521  | - | Y | N | N | N | N | N | del_insd | u | FoSteS   | intergenic                     | MESTP3,RP11-292B1.   | +-          | pseudogene   | 134337;37976  | intergenic           | MESTP3,RP11-292B1.2   | +-           | pseudogene    | 31688;140625  |
| 1223 | chr4  | 28960351  | + | chr4  | 28857310  | - | N | N | N | N | Y | Y | del_insd | u | FoSteS   | intergenic                     | MESTP3,RP11-292B1.   | +-          | pseudogene   | 134518;37795  | intergenic           | MESTP3,RP11-292B1.2   | +-           | pseudogene    | 31477;140836  |
| 1224 | chr4  | 70249433  | + | chr4  | 70806260  | - | N | N | Y | N | N | N | del_insd | u | FoSteS   | intergenic                     | RP11-618I10.2,RP11-6 | +-          | pseudogene   | 25538;3865    | intergenic           | RP11-704M14.1,RP11-61 | +-           | antisense,pr  | 3722;22140    |
| 1225 | chr5  | 99317522  | - | chr5  | 104095000 | + | N | N | N | N | Y | N | del_insd | u | FoSteS   | intergenic                     | CTD-2160D9.1,EEF1-6  | +-          | pseudogene   | 32235;14729   | ncRNA_intrn          | RP11-6N13.1           | +            | lincRNA       | 0             |
| 1226 | chr6  | 131884334 | + | chr6  | 131885333 | + | N | N | N | N | Y | Y | del_insd | u | FoSteS   | intergenic                     | RPL21P67,ARG1        | ++          | pseudogene   | 93658;9950    | intergenic           | RPL21P67,ARG1         | ++           | pseudogene    | 94657;8951    |
| 1227 | chr6  | 131884935 | + | chr6  | 131884409 | - | N | N | N | N | Y | Y | del_insd | u | FoSteS   | intergenic                     | RPL21P67,ARG1        | ++          | pseudogene   | 94259;9349    | intergenic           | RPL21P67,ARG1         | ++           | pseudogene    | 93733;9875    |
| 1228 | chr7  | 31586772  | - | chr7  | 31591996  | + | Y | Y | Y | Y | Y | Y | del_insd | u | FoSteS   | intronic                       | CCDC129              | +           | protein_cod  | 0             | intronic             | CCDC1                 |              |               |               |

|      |       |           |   |       |           |   |   |   |   |   |   |          |   |        |                |                      |        |              |               |                |                       |        |              |               |
|------|-------|-----------|---|-------|-----------|---|---|---|---|---|---|----------|---|--------|----------------|----------------------|--------|--------------|---------------|----------------|-----------------------|--------|--------------|---------------|
| 1255 | chr10 | 1394181   | + | chr14 | 59913999  | + | N | N | Y | N | N | del_inss | u | FoSteS | intronic       | ADARB2               | -      | protein_cod  | 0             | intronic       | GPR135                | -      | protein_cod  | 0             |
| 1256 | chr10 | 50462280  | + | chr8  | 144263158 | + | N | N | N | Y | N | del_inss | u | FoSteS | intergenic;in  | C10orf128,C10orf71-A | -,-    | protein_cod  | 65844;41877   | intergenic     | LY6H,GPIHBP1          | -,-    | protein_cod  | 21030;31910   |
| 1257 | chr11 | 134221128 | + | chr10 | 133431405 | + | N | Y | N | Y | N | del_inss | d | FoSteS | intronic       | GLB1L2               | -      | protein_cod  | 0             | intergenic     | TCERG1L,AL450307.2    | -,-    | protein_cod  | 321421;58110  |
| 1258 | chr11 | 110267640 | + | chr13 | 23580846  | + | N | N | N | N | Y | del_inss | d | FoSteS | ncRNA_intrn    | RP11-347E10.1        | -,-    | lincRNA      | 0             | intergenic     | AL157931.1,HMGA1P6    | -,-    | miRNA,pseu   | 28710;127467  |
| 1259 | chr11 | 4420710   | + | chr6  | 133938136 | + | N | N | N | N | Y | del_inss | u | FoSteS | intergenic     | TRIM21,OR51R1P       | +,+    | protein_cod  | 5784;18580    | ncRNA_intrn    | RP3-323P13.2          | +,+    | antisense    | 0             |
| 1260 | chr11 | 56474682  | + | chr6  | 13966544  | + | N | N | N | Y | N | del_inss | u | FoSteS | intergenic     | OR9G1,RP11-100N3.2   | +,+    | protein_cod  | 5901;29110    | intergenic     | RP11-12A2.1,CITED2    | +,+    | pseudogene   | 5827;26849    |
| 1261 | chr11 | 70835253  | + | chrY  | 13204033  | + | Y | N | N | N | N | del_inss | u | FoSteS | intronic       | SHANK2               | -      | protein_cod  | 0             | intergenic     | NONE,RP1-85D24.3      | NONE,- | NONE,pseu    | NONE;58708    |
| 1262 | chr12 | 33456332  | + | chr1  | 103913907 | + | N | N | N | N | Y | del_inss | d | FoSteS | intergenic     | AC026357.1,SNORD1    | +,+    | miRNA,sno    | 261577;59186  | intergenic     | RP11-347K2.2,RP11-153 | +,+    | lincRNA,linc | 77921;43594   |
| 1263 | chr12 | 51222886  | + | chr2  | 214171082 | + | N | Y | N | Y | Y | del_inss | d | FoSteS | intergenic     | ATF1,RN7SL519P       | +,+    | protein_cod  | 79811;12397   | intronic       | SPAG16                | +,+    | protein_cod  | 0             |
| 1264 | chr12 | 121490598 | + | chr3  | 183529734 | + | N | N | N | N | Y | del_inss | d | FoSteS | intergenic     | OASL,RP11-216P16.4   | +,+    | protein_cod  | 13553;27047   | UTR3           | YEATS2                | +      | protein_cod  | 0             |
| 1265 | chr12 | 21750661  | + | chr11 | 108585748 | + | N | Y | N | N | Y | del_inss | u | FoSteS | intronic       | SKA3                 | -      | protein_cod  | 0             | intronic       | DDX10                 | +      | protein_cod  | 0             |
| 1266 | chr13 | 97722135  | + | chr16 | 69225316  | + | N | N | N | N | Y | del_inss | d | FoSteS | intergenic;in  | snoU13,LINC00456     | +,+    | snoRNA,linc  | 12401;102588  | intronic;intrc | SNTB2                 | +,+    | protein_cod  | 0             |
| 1267 | chr13 | 63637902  | + | chr7  | 57606290  | + | Y | Y | N | N | Y | del_inss | u | FoSteS | intergenic;in  | LINC00448,LINC00370  | -,-    | lincRNA,linc | 331410;119332 | intergenic;ir  | RP11-1324A7.2,NCOR1f  | +,+    | pseudogene   | 60689;53210   |
| 1268 | chr14 | 77278458  | + | chr15 | 7836923   | + | N | N | N | Y | N | del_inss | d | FoSteS | intronic;intrc | ANGEL1               | -      | protein_cod  | 0             | intergenic;ir  | RP11-138H10.2,RP11-64 | +,+    | lincRNA,linc | 246531;138366 |
| 1269 | chr14 | 77736165  | + | chr15 | 98346707  | + | N | N | N | N | Y | del_inss | d | FoSteS | intronic       | NGB                  | -      | protein_cod  | 0             | intronic       | LINC00923             | +,+    | protein_cod  | 0             |
| 1270 | chr14 | 100993716 | + | chr17 | 76474620  | + | N | N | Y | N | N | del_inss | u | FoSteS | intronic       | WDR25                | +      | protein_cod  | 0             | intronic       | DNAH17                | +,+    | protein_cod  | 0             |
| 1271 | chr14 | 20079324  | + | chr19 | 19632141  | + | N | N | N | N | Y | del_inss | u | FoSteS | ncRNA_intrn    | RP11-597A11.1        | +,+    | pseudogene   | 0             | intronic;intrc | NDUFA13,YJEFN3,CTC-   | +,+,+  | protein_cod  | 0             |
| 1272 | chr14 | 55267157  | + | chr2  | 202453343 | + | N | N | N | N | Y | del_inss | u | FoSteS | intergenic     | SAMD4A,GCH1          | +,+    | protein_cod  | 7124;41569    | intronic       | ALS2CR11              | -      | protein_cod  | 0             |
| 1273 | chr14 | 55267238  | + | chr2  | 202453988 | + | N | N | N | N | Y | del_inss | u | FoSteS | intergenic     | SAMD4A,GCH1          | +,+    | protein_cod  | 7205;41488    | intronic       | ALS2CR11              | -      | protein_cod  | 0             |
| 1274 | chr14 | 55267240  | + | chr2  | 202454031 | + | Y | N | N | N | N | del_inss | u | FoSteS | intergenic     | SAMD4A,GCH1          | +,+    | protein_cod  | 7207;41486    | intronic       | ALS2CR11              | -      | protein_cod  | 0             |
| 1275 | chr14 | 55267453  | + | chr2  | 202454315 | + | N | Y | Y | Y | N | del_inss | u | FoSteS | intergenic     | SAMD4A,GCH1          | +,+    | protein_cod  | 7420;41273    | intronic       | ALS2CR11              | -      | protein_cod  | 0             |
| 1276 | chr15 | 29850882  | + | chr14 | 72263512  | + | N | Y | Y | Y | N | del_inss | u | FoSteS | intronic       | FAM189A1             | -      | protein_cod  | 0             | intergenic     | SIPA1L1,RP6-114E22.1  | +,+    | protein_cod  | 55566;51811   |
| 1277 | chr15 | 84363716  | + | chr22 | 50775669  | + | Y | N | N | N | N | del_inss | u | FoSteS | intronic       | ADAMTSL3             | +      | protein_cod  | 0             | intergenic     | DENND6B,PPP6R2        | -,-    | protein_cod  | 10180;6064    |
| 1278 | chr15 | 91112793  | + | chr3  | 142283122 | + | N | N | N | Y | N | del_inss | d | FoSteS | intronic;intrc | CRTC3                | +      | protein_cod  | 0             | intronic;intrc | ATR                   | -      | protein_cod  | 0             |
| 1279 | chr15 | 91112793  | + | chr3  | 142283122 | + | N | Y | N | N | N | del_inss | d | FoSteS | intronic;intrc | CRTC3                | +      | protein_cod  | 0             | intronic;intrc | ATR                   | -      | protein_cod  | 0             |
| 1280 | chr16 | 32127861  | + | chr1  | 121137800 | + | N | Y | N | N | N | del_inss | d | FoSteS | ncRNA_intrn    | HERC2P4              | -      | pseudogene   | 0             | ncRNA_intrn    | RP11-343N15.1         | -      | lincRNA      | 0             |
| 1281 | chr16 | 33041231  | + | chr10 | 42647088  | + | N | Y | Y | N | N | del_inss | u | FoSteS | intergenic     | RP11-19N8.2,RP11-19  | -,-    | pseudogene   | 1873;13699    | intergenic     | KSR1P1,IGKV1OR10-1    | +,+    | pseudogene   | 2091;33699    |
| 1282 | chr16 | 33521338  | + | chr7  | 57918040  | + | N | N | N | N | Y | del_inss | u | FoSteS | intergenic;in  | BMS1P8,ENPP7P13      | +,+    | pseudogene   | 20367;50550   | intergenic;ir  | RP11-548K12.12,NONE   | +,NONE | pseudogene   | 21288;NONE    |
| 1283 | chr16 | 33955750  | + | chrY  | 10021293  | + | N | N | N | N | Y | del_inss | u | FoSteS | intergenic     | AC136932.2,LINC0027  | -,-    | miRNA,lincf  | 9729;5302     | intergenic     | PCMTD1P1,CDC27P2      | +,+    | pseudogene   | 9477;6693     |
| 1284 | chr17 | 41464006  | + | chr12 | 96071648  | + | N | Y | N | N | N | del_inss | u | FoSteS | ncRNA_exo      | LINC00910            | -      | lincRNA      | 0             | intronic       | NTN4                  | -      | protein_cod  | 0             |
| 1285 | chr17 | 25274659  | + | chr7  | 61666149  | + | N | Y | Y | N | N | del_inss | u | FoSteS | intergenic;in  | NONE,RP11-260A9.1    | NONE,+ | NONE,pseu    | NONE;34061    | intergenic;ir  | NONE,RP11-715L17.1    | NONE,+ | NONE,pseu    | NONE;155720   |
| 1286 | chr17 | 25290065  | + | chr7  | 65112570  | + | N | N | N | N | Y | del_inss | u | FoSteS | intergenic     | NONE,RP11-260A9.1    | NONE,+ | NONE,pseu    | NONE;18655    | exonic         | AC104057.1            | -      | protein_cod  | 0             |
| 1287 | chr17 | 45209279  | + | chr9  | 37062206  | + | N | Y | N | N | N | del_inss | d | FoSteS | intronic       | CDC27                | -      | protein_cod  | 0             | intergenic     | RP11-297B17.2,RP11-46 | +,+    | pseudogene   | 14972;11322   |
| 1288 | chr18 | 46604182  | + | chr10 | 28938628  | + | N | Y | N | N | N | del_inss | u | FoSteS | intronic       | DYM                  | -      | protein_cod  | 0             | intergenic     | WAC,RNU4ATAC6P        | +,+    | protein_cod  | 26587;2931    |
| 1289 | chr18 | 77301709  | + | chr5  | 177696382 | + | N | Y | Y | N | N | del_inss | u | FoSteS | intergenic     | NFATC1,RP11-567M1f   | +,+    | protein_cod  | 12384;34751   | intronic       | COL23A1               | -      | protein_cod  | 0             |
| 1290 | chr19 | 11422016  | + | chr1  | 38241383  | + | N | Y | N | N | N | del_inss | u | FoSteS | ncRNA_intrn    | CTC-510F12.4         | +,+    | 3prime_ove   | 0             | upstream       | ACTN4P2               | +,+    | pseudogene   | 0             |
| 1291 | chr19 | 31150120  | + | chr14 | 34516674  | + | N | N | N | N | Y | del_inss | u | FoSteS | intronic       | ZNF536               | +      | protein_cod  | 0             | ncRNA_intrn    | EGLN3-AS1             | +,+    | antisense    | 0             |
| 1292 | chr2  | 194083178 | + | chr12 | 28226413  | + | N | Y | N | Y | Y | del_inss | u | FoSteS | intergenic     | PCGEM1,AC092638.1    | +,+    | lincRNA,pse  | 441553;38030  | intergenic     | PTH1H,CCDC91          | +,+    | protein_cod  | 100775;59769  |
| 1293 | chr2  | 202454315 | + | chr14 | 55267453  | + | Y | N | N | Y | Y | del_inss | u | FoSteS | intronic       | ALS2CR11             | -      | protein_cod  | 0             | intergenic     | SAMD4A,GCH1           | +,+    | protein_cod  | 7420;41273    |
| 1294 | chr2  | 202454409 | + | chr14 | 55267514  | + | N | Y | Y | Y | Y | del_inss | u | FoSteS | intronic       | ALS2CR11             | -      | protein_cod  | 0             | intergenic     | SAMD4A,GCH1           | +,+    | protein_cod  | 7481;41212    |
| 1295 | chr2  | 190801557 | + | chr15 | 78892087  | + | N | N | Y | Y | N | del_inss | u | FoSteS | intergenic     | AC019178.2,MSTN      | -,-    | pseudogene   | 5821;118866   | intronic       | CHRNA3                | +,+    | protein_cod  | 0             |
| 1296 | chr2  | 219874443 | + | chr20 | 47078889  | + | N | N | N | Y | N | del_inss | u | FoSteS | ncRNA_intrn    | AC097468.4           | +,+    | antisense    | 0             | intergenic     | RP1-66N13.1,RNU7-144  | +,+    | lincRNA,snf  | 65251;43591   |
| 1297 | chr2  | 104694441 | + | chr7  | 135542293 | + | N | N | N | Y | N | del_inss | u | FoSteS | downstream     | RP11-7614.1          | +      | lincRNA      | 5385;20723    | intergenic     | AC091736.1,AC015987.1 | +,+    | miRNA,anti   | 59436;68910   |
| 1298 | chr20 | 34272355  | + | chr10 | 34808792  | + | N | N | N | N | Y | del_inss | u | FoSteS | intronic       | NFS1                 | -      | protein_cod  | 0             | intronic       | PARD3                 | -      | protein_cod  | 0             |
| 1299 | chr20 | 26189652  | + | chr2  | 133015264 | + | N | N | N | Y | N | del_inss | u | FoSteS | ncRNA_exo      | MIIR663A             | -      | processed_i  | 0             | upstream       | MIR663B               | -      | miRNA        | 0             |
| 1300 | chr20 | 13914969  | + | chr5  | 132961586 | + | N | N | N | Y | N | del_inss | u | FoSteS | intronic       | SEL1L2               | -      | protein_cod  | 0             | ncRNA_exo      | AC005195.1            | -      | miRNA        | 0             |
| 1301 | chr21 | 11097576  | + | chr7  | 152099091 | + | N | N | N | Y | Y | del_inss | u | FoSteS | ncRNA_exo      | BAGE2                | -      | pseudogene   | 0             | intronic       | KMT2C                 | -      | protein_cod  | 0             |
| 1302 | chr21 | 44757304  | + | chr7  | 44294745  | + | N | Y | Y | Y | N | del_inss | d | FoSteS | intergenic;in  | LINC00322,AP001046   | -,-    | lincRNA,linc | 5385;20723    | intronic       | CAMK2B                | -      | protein_cod  | 0             |
| 1303 | chr21 | 44757304  | + | chr7  | 44294747  | + | N | Y | Y | N | N | del_inss | d | FoSteS | intergenic;in  | LINC00322,AP001046   | -,-    | lincRNA,linc | 5385;20723    | intronic       | CAMK2B                | -      | protein_cod  | 0             |
| 1304 | chr21 | 14603018  | + | chr9  | 34904841  | + | N | Y | N | N | N | del_inss | u | FoSteS | intergenic     | AJ239321.3,FGF7P2    | +,+    | pseudogene   | 109890;118568 | intergenic     | FAM205CP,GLULP4       | +,+    | pseudogene   | 9066;12331    |
| 1305 | chr22 | 38506071  | + | chr4  | 2245662   | + | N | Y | Y | N | N | del_inss | u | FoSteS | intronic       | BA1AP2L2             | +,+    | protein_cod  | 0             | intergenic     | HAUS3,MXD4            | +,+    | protein_cod  | 1771;3497     |
| 1306 | chr22 | 48664958  | + | chr5  | 102351002 | + | N | N | N | Y | N | del_inss | u | FoSteS | intergenic     | LL22NC03-121E8.3,M   | +,+    | lincRNA,mif  | 125912;5218   | intronic       | PAM                   | +,+    | protein_cod  | 0             |
| 1307 | chr3  | 84433394  | + | chr15 | 71021994  | + | N | N | N | Y | N | del_inss | u | FoSteS | intergenic     | AC108696.1,AC10702   | +,+    | miRNA,mir    | 93990;112333  | intronic       | UACA                  | +,+    | protein_cod  | 0             |
| 1308 | chr3  | 25939094  | + | chr16 | 19332982  | + | N | N | Y | N | N | del_inss | u | FoSteS | intergenic     | LINC00692,RP2P2      | +,+    | protein_cod  | 23905;118066  | intronic       | CLEC19A               | +,+    | protein_cod  | 0             |
| 1309 | chr3  | 23128954  | + | chr2  | 69921696  | + | N | N | N | N | Y | del_inss | u | FoSteS | intergenic     | SALL4P5,RPL24P7      | +,+    | pseudogene   | 95881;46909   | intergenic     | snoU13,AC092431.3     | +,+    | snoRNA,linc  | 27103;5628    |
| 1310 | chr3  | 117895756 | + | chr4  | 188614276 | + | N | N | Y | N | N | del_inss | d | FoSteS | ncRNA_intrn    | RP11-384F7.1         | +,+    | lincRNA      | 0             | intergenic;ir  | RP11-565A3.2,ADAM20F  | +,+    | lincRNA,pse  | 20481;52972   |
| 1311 | chr3  | 2747350   | + | chr7  | 113682819 | + | N | N | N | N | Y | del_inss | u | FoSteS | intronic       | CNTN4                | +      | protein_cod  | 0             | intronic       | PPP1R3A               | -      | protein_cod  | 0             |
| 1312 | chr3  | 16409885  | + | chrY  | 7588542   | + | N | Y | N | N | N | del_inss | u | FoSteS | intronic;intrc | RFTN1                | -      | protein_cod  | 0             | ncRNA_intrn    | RFTN1P1               | -      | pseudogene   | 0             |
| 1313 | chr4  | 20887010  | + | chr17 | 33007470  | + | Y | N | Y | Y | N | del_inss | u | FoSteS | intronic       | KCNIP4               | -      | protein_cod  | 0             | intergenic     | TMEM132E,RP11-212E8   | +,+    | protein_cod  | 41133;45058   |
| 1314 | chr4  | 95990463  | + | chr8  | 52247491  | + | N | N | Y | N | N | del_inss | u | FoSteS | intronic;intrc | BMP1R1B              | +,+    | protein_cod  | 0             | intergenic;ir  | RN7SL318P,RP11-745Kf  | +,+    | misc_RNA,i   | 224562;87949  |
| 1315 | chr4  | 191027638 | + | chr8  | 146253372 | + | N | N | Y | N | N | del_inss | u | FoSteS | intergenic     | DUX4L2,NONE          | +,NONE | protein_cod  | 13919;NONE    | intergenic     |                       |        |              |               |

|      |       |           |   |       |           |   |   |   |   |   |   |   |          |   |        |                 |                     |        |              |               |                 |                       |        |              |               |
|------|-------|-----------|---|-------|-----------|---|---|---|---|---|---|---|----------|---|--------|-----------------|---------------------|--------|--------------|---------------|-----------------|-----------------------|--------|--------------|---------------|
| 1339 | chr8  | 14346419  | + | chr12 | 42477173  | + | Y | Y | N | N | N | N | del_inss | d | FoSteS | intronic        | SGCZ                | -      | protein_cod  | 0             | UTR3            | GXYLT1                | -      | protein_cod  | 0             |
| 1340 | chr8  | 68316461  | + | chr12 | 79270616  | + | N | N | N | N | Y | N | del_inss | u | FoSteS | intergenic      | RP11-7F18.2,RP11-7F | ++     | lincRNA,pse  | 59139;2289    | intronic        | SYT1                  | +      | protein_cod  | 0             |
| 1341 | chr8  | 142837554 | + | chr12 | 131879862 | + | N | Y | N | N | N | N | del_inss | d | FoSteS | intergenic      | AC138647.1,AC10441  | ++     | protein_cod  | 308717;189306 | intergenic      | RP13-507P19.1,RP11-88 | +      | lincRNA,linc | 24258;73994   |
| 1342 | chr8  | 146253477 | + | chr4  | 191027811 | + | N | N | Y | N | N | N | del_inss | d | FoSteS | intergenic      | ZNF252P,AS1,AC139'  | ++     | antisense,p  | 22045;19769   | intergenic      | DUX4L2,NONE           | +,NONE | protein_cod  | 14092;NONE    |
| 1343 | chr8  | 146300855 | + | chr4  | 191043760 | + | N | N | N | Y | N | N | del_inss | d | FoSteS | intergenic      | C8orf33,NONE        | +,NONE | protein_cod  | 19439;NONE    | intergenic      | DUX4L2,NONE           | +,NONE | protein_cod  | 30041;NONE    |
| 1344 | chr8  | 101715287 | + | chrX  | 73802880  | + | N | N | N | Y | N | N | del_inss | d | FoSteS | UTR3            | PABPC1              | -      | protein_cod  | 0             | downstream      | PABPC1P3              | +      | protein_cod  | 0             |
| 1345 | chr8  | 23242910  | + | chr11 | 71274440  | + | N | N | N | N | N | Y | del_inss | u | FoSteS | intergenic      | AL391117.1,SUMO2P2  | ++     | miRNA,pse    | 289808;389194 | intergenic      | KRTAP5-9,KRTAP5-10    | +      | protein_cod  | 13787;2169    |
| 1346 | chr9  | 34904399  | + | chr21 | 14602603  | + | N | Y | N | N | N | N | del_inss | u | FoSteS | intergenic      | FAM205CP,GLULP4     | ++     | pseudogen    | 8624;12773    | intergenic      | AJ239321.3,FGF7P2     | ++     | pseudogen    | 109475;118983 |
| 1347 | chr9  | 109550840 | + | chr24 | 171599033 | + | N | N | Y | N | N | N | del_inss | u | FoSteS | intergenic      | RP11-308N19.5,RNA5  | ++     | pseudogen    | 65629;55190   | intergenic      | HSP90AA6P,RP11-322J2  | ++     | pseudogen    | 72432;64587   |
| 1348 | chr9  | 66457946  | + | chrY  | 9930325   | + | N | Y | N | N | N | N | del_inss | u | FoSteS | ncRNA_exo       | RP11-262H14.1       | +      | lincRNA      | 0             | downstream      | RNA5SP519             | -      | rRNA         | 0             |
| 1349 | chrX  | 133182350 | + | chr1  | 164989751 | + | N | Y | N | N | N | N | del_inss | d | FoSteS | intergenic      | AF003529.2,Y_RNA    | ++     | pseudogen    | 58237;93908   | intergenic      | AL390119.1,SNORD112   | ++     | miRNA,snol   | 36522;51959   |
| 1350 | chrX  | 10159335  | + | chr11 | 63660830  | + | N | N | N | N | N | Y | del_inss | d | FoSteS | intronic        | CLCN4               | ++     | protein_cod  | 0             | intronic;intr   | MARK2                 | +      | protein_cod  | 0             |
| 1351 | chrX  | 26050060  | + | chr14 | 94846161  | + | Y | N | N | N | N | N | del_inss | d | FoSteS | intergenic      | RP11-86A5.1,MAGEB'  | ++     | lincRNA,pro  | 138399;106400 | intronic        | SERPINA1              | +      | protein_cod  | 0             |
| 1352 | chrX  | 108796416 | + | chr6  | 160656534 | + | Y | N | N | N | N | N | del_inss | d | FoSteS | intergenic      | NXT2,RP1-136J15.5   | ++     | protein_cod  | 8497;15291    | intronic        | SLC22A2               | -      | protein_cod  | 0             |
| 1353 | chrY  | 13204402  | + | chr11 | 70835639  | + | N | N | N | N | N | Y | del_inss | d | FoSteS | intergenic      | NONE,RP1-85D24.3    | +,NONE | protein_cod  | NONE;58339    | intronic        | SHANK2                | -      | protein_cod  | 0             |
| 1354 | chrY  | 10019433  | + | chr16 | 33953007  | + | N | N | N | N | N | Y | del_inss | u | FoSteS | intergenic      | PCMTD1P1,CDC27P2    | ++     | pseudogen    | 7617;8553     | intergenic      | AC136932.2,LINC00273  | ++     | miRNA,lincf  | 6986;8045     |
| 1355 | chrY  | 7588505   | + | chr3  | 16406533  | + | N | Y | N | N | N | N | del_inss | u | FoSteS | ncRNA_intr      | RFTN1P1             | -      | pseudogen    | 0             | intronic        | RFTN1                 | -      | protein_cod  | 0             |
| 1356 | chrY  | 9930499   | + | chr9  | 64658213  | + | N | Y | N | N | N | N | del_inss | d | FoSteS | ncRNA_exo       | RNA5SP519           | -      | rRNA         | 0             | ncRNA_exo       | RNA5SP283             | -      | rRNA         | 0             |
| 1357 | chr1  | 21019524  | + | chr1  | 147391975 | + | N | N | Y | N | N | N | del_inss | d | FoSteS | ncRNA_intr      | RP5-930J4.5         | -      | pseudogen    | 0             | intergenic      | GJA8,GPR89B           | ++     | protein_cod  | 10582;8531    |
| 1358 | chr1  | 24997299  | + | chr1  | 24994642  | + | N | N | Y | N | N | N | del_inss | d | FoSteS | intronic;intr   | SRRM1               | +      | protein_cod  | 0             | intronic;intr   | SRRM1                 | +      | protein_cod  | 0             |
| 1359 | chr10 | 38467917  | + | chr10 | 5252858   | + | N | N | N | N | N | Y | del_inss | u | FoSteS | ncRNA_intr      | RP11-508N22.8       | +      | processed_   | 0             | intronic        | AGAP6                 | +      | protein_cod  | 0             |
| 1360 | chr11 | 18268098  | + | chr11 | 31666353  | + | Y | N | N | N | N | N | del_inss | u | FoSteS | ncRNA_intr      | SAA2-SAA4           | -      | processed_   | 0             | ncRNA_intr      | Z83001.1              | -      | antisense    | 0             |
| 1361 | chr11 | 18355029  | + | chr11 | 31802856  | + | Y | N | N | N | N | N | del_inss | u | FoSteS | intronic        | GTF2H1              | +      | protein_cod  | 0             | intronic        | ELP4                  | +      | protein_cod  | 0             |
| 1362 | chr11 | 31803181  | + | chr11 | 18749951  | + | Y | N | N | N | N | N | del_inss | d | FoSteS | intronic        | ELP4                | +      | protein_cod  | 0             | ncRNA_intr      | RP11-1081L13.4        | +      | antisense    | 0             |
| 1363 | chr11 | 48609308  | + | chr11 | 55241409  | + | N | N | N | N | Y | N | del_inss | u | FoSteS | intergenic;intr | OR4A45P,OR4A41P     | ++     | pseudogen    | 7420;2004     | intergenic;intr | OR4A13P,OR4A50P       | ++     | pseudogen    | 6221;2010     |
| 1364 | chr11 | 55241495  | + | chr11 | 48609331  | + | N | N | N | N | Y | N | del_inss | d | FoSteS | intergenic      | OR4A13P,OR4A50P     | ++     | pseudogen    | 6307;1924     | intergenic;intr | OR4A45P,OR4A41P       | ++     | pseudogen    | 7443;1981     |
| 1365 | chr11 | 133223792 | + | chr11 | 119518986 | + | N | N | N | Y | N | N | del_inss | d | FoSteS | intronic        | OPCML               | -      | protein_cod  | 0             | ncRNA_intr      | RP11-196E1.3          | +      | antisense    | 0             |
| 1366 | chr11 | 133223936 | + | chr11 | 119518961 | + | Y | N | N | N | N | N | del_inss | d | FoSteS | intronic        | OPCML               | -      | protein_cod  | 0             | ncRNA_intr      | RP11-196E1.3          | +      | antisense    | 0             |
| 1367 | chr11 | 133223941 | + | chr11 | 119519011 | + | N | Y | N | N | N | N | del_inss | d | FoSteS | intronic        | OPCML               | -      | protein_cod  | 0             | ncRNA_intr      | RP11-196E1.3          | +      | antisense    | 0             |
| 1368 | chr11 | 133223981 | + | chr11 | 119518919 | + | N | N | N | N | N | Y | del_inss | d | FoSteS | intronic        | OPCML               | -      | protein_cod  | 0             | ncRNA_intr      | RP11-196E1.3          | +      | antisense    | 0             |
| 1369 | chr11 | 133223997 | + | chr11 | 119519034 | + | N | N | N | N | Y | N | del_inss | d | FoSteS | intronic        | OPCML               | -      | protein_cod  | 0             | ncRNA_intr      | RP11-196E1.3          | +      | antisense    | 0             |
| 1370 | chr11 | 133224219 | + | chr11 | 119519052 | + | N | Y | N | N | N | N | del_inss | d | FoSteS | intronic        | OPCML               | -      | protein_cod  | 0             | ncRNA_intr      | RP11-196E1.3          | +      | antisense    | 0             |
| 1371 | chr12 | 9559054   | + | chr12 | 31271218  | + | N | N | N | Y | N | N | del_inss | u | FoSteS | ncRNA_intr      | RP11-599J14.2       | -      | pseudogen    | 0             | ncRNA_intr      | RP11-551L14.1         | -      | pseudogen    | 0             |
| 1372 | chr12 | 11178341  | + | chr12 | 11233957  | + | N | N | N | N | N | Y | del_inss | u | FoSteS | intergenic      | TAS2R19,TAS2R31     | ++     | protein_cod  | 3122;4645     | intergenic      | TAS2R64P,TAS2R43      | ++     | pseudogen    | 2187;9929     |
| 1373 | chr12 | 11178538  | + | chr12 | 11205497  | + | N | N | N | N | N | N | del_inss | u | FoSteS | intergenic;intr | TAS2R19,TAS2R31     | ++     | protein_cod  | 3319;4448     | intergenic;intr | TAS2R63P,TAS2R46      | ++     | pseudogen    | 3642;8467     |
| 1374 | chr12 | 11284305  | + | chr12 | 11181660  | + | N | N | N | N | N | Y | del_inss | d | FoSteS | intergenic;intr | RP11-673D15.7,TAS2f | ++     | pseudogen    | 34432;1252    | intergenic      | TAS2R19,TAS2R31       | ++     | protein_cod  | 6441;1326     |
| 1375 | chr12 | 31272494  | + | chr12 | 9559639   | + | N | N | N | Y | N | N | del_inss | d | FoSteS | ncRNA_exo       | RP11-551L14.1       | -      | pseudogen    | 0             | ncRNA_intr      | RP11-599J14.2         | -      | pseudogen    | 0             |
| 1376 | chr12 | 59935795  | + | chr12 | 59952861  | + | Y | Y | Y | Y | Y | Y | del_inss | u | FoSteS | intergenic      | AC108721.1,RNU4-20  | ++     | miRNA,snR    | 13746;44779   | intergenic      | AC108721.1,RNU4-20P   | ++     | miRNA,snR    | 30812;27713   |
| 1377 | chr12 | 59952987  | + | chr12 | 59946633  | + | Y | Y | Y | Y | Y | Y | del_inss | u | FoSteS | intergenic      | AC108721.1,RNU4-20  | ++     | miRNA,snR    | 30938;27587   | intergenic      | AC108721.1,RNU4-20P   | ++     | miRNA,snR    | 24584;33941   |
| 1378 | chr13 | 36531242  | + | chr13 | 36532169  | + | N | N | N | Y | N | N | del_inss | u | FoSteS | intronic        | DCLK1               | +      | protein_cod  | 0             | intronic        | DCLK1                 | +      | protein_cod  | 0             |
| 1379 | chr13 | 78508913  | + | chr13 | 84480443  | + | N | N | N | N | N | N | del_inss | u | FoSteS | intronic        | VENTXP2,UBE2D3P4    | ++     | antisense    | 0             | intergenic      | VENTXP2,UBE2D3P4      | ++     | pseudogen    | 2127;110419   |
| 1380 | chr13 | 84484521  | + | chr13 | 78509327  | + | N | N | N | N | N | N | del_inss | d | FoSteS | intronic;intr   | VENTXP2,UBE2D3P4    | ++     | pseudogen    | 2605;109941   | ncRNA_intr      | RNF219-AS1            | +      | antisense    | 0             |
| 1381 | chr15 | 79220652  | + | chr15 | 79223878  | + | N | N | N | Y | N | N | del_inss | u | FoSteS | intronic;intr   | CTSH                | +      | protein_cod  | 0             | intronic;intr   | CTSH                  | +      | protein_cod  | 0             |
| 1382 | chr15 | 91981578  | + | chr15 | 91989267  | + | Y | Y | Y | Y | Y | Y | del_inss | u | FoSteS | ncRNA_intr      | RP11-661P17.1       | +      | lincRNA      | 0             | ncRNA_intr      | RP11-661P17.1         | +      | lincRNA      | 0             |
| 1383 | chr15 | 91989617  | + | chr15 | 91983461  | + | Y | Y | Y | Y | Y | Y | del_inss | u | FoSteS | ncRNA_intr      | RP11-661P17.1       | +      | lincRNA      | 0             | ncRNA_intr      | RP11-661P17.1         | +      | lincRNA      | 0             |
| 1384 | chr19 | 605299    | + | chr19 | 608434    | + | N | N | Y | Y | N | N | del_inss | u | FoSteS | intronic;intr   | HCN2                | +      | protein_cod  | 0             | intronic;intr   | HCN2                  | +      | protein_cod  | 0             |
| 1385 | chr19 | 608624    | + | chr19 | 605316    | + | N | N | Y | Y | N | N | del_inss | u | FoSteS | intronic        | HCN2                | +      | protein_cod  | 0             | intronic        | HCN2                  | +      | protein_cod  | 0             |
| 1386 | chr19 | 53936267  | + | chr19 | 53973204  | + | N | N | Y | N | N | N | del_inss | u | FoSteS | ncRNA_intr      | ZNF761,TPM3P9       | ++     | processed_   | 0             | intronic;intr   | ZNF813                | ++     | processed_   | 0             |
| 1387 | chr19 | 53937485  | + | chr19 | 53936696  | + | N | N | Y | N | N | N | del_inss | u | FoSteS | intronic        | ZNF813              | +      | protein_cod  | 0             | ncRNA_intr      | ZNF761,TPM3P9         | ++     | processed_   | 0             |
| 1388 | chr22 | 42964157  | + | chr22 | 214171095 | + | N | N | N | N | Y | N | del_inss | u | FoSteS | intronic        | MTA3                | +      | protein_cod  | 0             | intronic;intr   | SPAG16                | +      | protein_cod  | 0             |
| 1389 | chr22 | 25692175  | + | chr22 | 25988830  | + | N | Y | N | N | N | N | del_inss | u | FoSteS | intergenic      | RP3-462D8.2,IGLL3P  | ++     | lincRNA,pse  | 13534;22048   | intronic        | ADRBK2                | +      | protein_cod  | 0             |
| 1390 | chr22 | 25988947  | + | chr22 | 25692343  | + | N | Y | N | N | N | N | del_inss | u | FoSteS | intronic        | ADRBK2              | +      | protein_cod  | 0             | intergenic      | RP3-462D8.2,IGLL3P    | ++     | lincRNA,pse  | 13702;21880   |
| 1391 | chr3  | 95465766  | + | chr3  | 95470766  | + | Y | Y | Y | Y | Y | Y | del_inss | u | FoSteS | intergenic      | MTMFD2P1,AC10873E   | ++     | pseudogen    | 63729;419895  | intergenic      | MTMFD2P1,AC108739.1   | ++     | pseudogen    | 68729;41895   |
| 1392 | chr3  | 95471000  | + | chr3  | 95468117  | + | Y | Y | Y | Y | Y | Y | del_inss | u | FoSteS | intergenic      | MTMFD2P1,AC10873E   | ++     | pseudogen    | 68963;414661  | intergenic      | MTMFD2P1,AC108739.1   | ++     | pseudogen    | 66800;417544  |
| 1393 | chr3  | 146385189 | + | chr3  | 146394863 | + | Y | Y | Y | Y | Y | Y | del_inss | u | FoSteS | intergenic      | PLSCR5,RP11-649A16  | ++     | protein_cod  | 61186;242283  | intergenic      | PLSCR5,RP11-649A16.1  | ++     | protein_cod  | 70860;232609  |
| 1394 | chr3  | 146395165 | + | chr3  | 146390405 | + | Y | Y | Y | Y | Y | Y | del_inss | u | FoSteS | intergenic      | PLSCR5,RP11-649A16  | ++     | protein_cod  | 71162;232307  | intergenic      | PLSCR5,RP11-649A16.1  | ++     | protein_cod  | 66402;237067  |
| 1395 | chr3  | 194543292 | + | chr3  | 194546259 | + | Y | Y | Y | Y | Y | Y | del_inss | u | FoSteS | intergenic      | AC090505.6,AC090505 | ++     | lincRNA,linc | 40395;5327    | intergenic      | AC090505.6,AC090505.1 | ++     | lincRNA,linc | 43362;2360    |
| 1396 | chr3  | 194546432 | + | chr3  | 194543309 | + | Y | Y | Y | Y | Y | Y | del_inss | u | FoSteS | intergenic      | AC090505.6,AC090505 | ++     | lincRNA,linc | 43535;2187    | intergenic      | AC090505.6,AC090505.1 | ++     | lincRNA,linc | 40412;5310    |
| 1397 | chr7  | 63205312  | + | chr7  | 63203812  | + | N | N | N | N | N | Y | del_inss | u | FoSteS | intergenic      | CTD-2526L21.2,CICP2 | ++     | pseudogen    | 44493;23323   | intergenic      | RNU6-912P,RP13-254B1  | ++     | snRNA,pse    | 24050;1387    |

|      |       |           |   |       |           |   |   |   |   |   |   |            |   |        |               |                       |         |             |              |               |                       |         |               |              |
|------|-------|-----------|---|-------|-----------|---|---|---|---|---|---|------------|---|--------|---------------|-----------------------|---------|-------------|--------------|---------------|-----------------------|---------|---------------|--------------|
| 1423 | chr1  | 225248160 | + | chr1  | 225133123 | + | N | Y | N | N | N | del_inssu  | u | FoSteS | intronic      | DNAH14                | +       | protein_cod | 0            | intronic      | DNAH14                | +       | protein_cod   | 0            |
| 1424 | chr1  | 225248398 | + | chr1  | 225133380 | + | N | N | N | Y | N | del_inssu  | u | FoSteS | intronic      | DNAH14                | +       | protein_cod | 0            | intronic      | DNAH14                | +       | protein_cod   | 0            |
| 1425 | chr10 | 38285872  | + | chr10 | 78607612  | + | N | N | N | N | Y | del_inssu  | d | FoSteS | intergenic    | Y_RNA,ZNF33A          | ++      | misc_RNA,t  | 1969;13706   | intergenic    | ATP5G1P8,KCNMA1       | +-      | pseudogene    | 10993;21747  |
| 1426 | chr10 | 38816527  | + | chr10 | 38818875  | + | Y | N | N | N | N | del_inssu  | d | FoSteS | intergenic;in | RP11-291L22.4,ABCD    | ++      | lincRNA,ps  | 61423;78022  | intergenic;ir | RP11-291L22.4,ABCD1P  | ++      | lincRNA,ps    | 63771;75674  |
| 1427 | chr10 | 38818664  | + | chr10 | 38815181  | + | Y | N | N | N | N | del_inssu  | u | FoSteS | intergenic;in | RP11-291L22.4,ABCD    | ++      | lincRNA,ps  | 63560;75885  | intergenic    | RP11-291L22.4,ABCD1P  | ++      | lincRNA,ps    | 60077;79368  |
| 1428 | chr10 | 76654961  | + | chr10 | 19211100  | + | N | N | N | N | Y | del_inssu  | u | FoSteS | intronic;intr | KAT6B                 | +-      | protein_cod | 0            | intergenic;ir | RP11-139J15.5,RP11-28 | +-      | lincRNA,ps    | 174318;18330 |
| 1429 | chr11 | 9644770   | + | chr11 | 10154921  | + | N | Y | N | N | Y | del_inssu  | u | FoSteS | intergenic;in | RP11-16F15.1,RP11-1   | +-      | pseudogene  | 16614;7785   | intronic;intr | SBF2                  | -       | protein_cod   | 0            |
| 1430 | chr11 | 10154081  | + | chr11 | 9643842   | + | N | N | N | N | Y | del_inssu  | u | FoSteS | intronic      | SBF2                  | -       | protein_cod | 0            | intergenic    | RP11-16F15.1,RP11-16F | +-      | pseudogene    | 15686;8713   |
| 1431 | chr11 | 10154155  | + | chr11 | 9643771   | + | N | Y | N | N | N | del_inssu  | u | FoSteS | intronic      | SBF2                  | -       | protein_cod | 0            | intergenic    | RP11-16F15.1,RP11-16F | +-      | pseudogene    | 15615;8784   |
| 1432 | chr11 | 48545131  | + | chr11 | 48609331  | + | N | N | N | Y | N | del_inssu  | d | FoSteS | intergenic    | OR4A40P,OR4A43P       | ++      | pseudogene  | 10359;2485   | intergenic;ir | OR4A45P,OR4A41P       | ++      | pseudogene    | 7443;1981    |
| 1433 | chr11 | 48609285  | + | chr11 | 48545017  | + | N | N | N | Y | N | del_inssu  | u | FoSteS | intergenic    | OR4A45P,OR4A41P       | ++      | pseudogene  | 7397;2027    | intergenic    | OR4A40P,OR4A43P       | ++      | pseudogene    | 10245;2599   |
| 1434 | chr12 | 11205575  | + | chr12 | 11276606  | + | N | N | N | N | Y | del_inssu  | d | FoSteS | intergenic    | TAS2R63P,TAS2R46      | -,-     | pseudogene  | 3720;8389    | intergenic    | RP11-673D15.7,TAS2R3  | -,-     | pseudogene    | 26733;8951   |
| 1435 | chr12 | 11275888  | + | chr12 | 11204715  | + | N | N | N | N | Y | del_inssu  | u | FoSteS | intergenic;in | RP11-673D15.7,TAS2f   | -,-     | pseudogene  | 26015;9669   | intergenic;ir | TAS2R63P,TAS2R46      | -,-     | pseudogene    | 2860;9249    |
| 1436 | chr14 | 106932641 | + | chr14 | 107174926 | + | Y | Y | Y | N | N | del_inssu  | d | FoSteS | intergenic    | IGHV17-43.1,IGHV18-44 | -,-     | IG_V_pseu   | 3753;1585    | intergenic    | IGHV1-69,IGHV2-70     | -,-     | IG_V_gene     | 4498;3894    |
| 1437 | chr14 | 107094692 | + | chr14 | 106804954 | + | Y | Y | Y | N | N | del_inssu  | u | FoSteS | upstream;dc   | IGHV17-60.1,IGHV4-61  | -,-     | IG_V_pseu   | 0            | downstream    | IGHV4-31              | -       | IG_V_gene     | 0            |
| 1438 | chr14 | 107094770 | + | chr14 | 106804822 | + | N | N | N | N | Y | del_inssu  | u | FoSteS | upstream;dc   | IGHV17-60.1,IGHV4-61  | -,-     | IG_V_pseu   | 0            | downstream    | IGHV4-31              | -       | IG_V_gene     | 0            |
| 1439 | chr15 | 24492714  | + | chr15 | 24485059  | + | N | N | N | N | Y | del_inssu  | d | FoSteS | ncRNA_intr    | RP11-580I1.2          | +       | lincRNA     | 0            | ncRNA_intr    | PWRN1                 | +       | lincRNA       | 0            |
| 1440 | chr15 | 24799349  | + | chr15 | 24486265  | + | N | N | N | N | Y | del_inssu  | u | FoSteS | ncRNA_intr    | PWRN1                 | +       | lincRNA     | 0            | ncRNA_intr    | RP11-580I1.2          | +       | lincRNA       | 0            |
| 1441 | chr17 | 10886860  | + | chr17 | 10895370  | + | Y | Y | Y | Y | Y | del_inssu  | u | FoSteS | intergenic    | RP11-963H4.3,AC00528  | ++      | lincRNA,mif | 102648;70245 | intergenic    | RP11-963H4.3,AC00528  | ++      | lincRNA,mif   | 111518;61375 |
| 1442 | chr17 | 10890416  | + | chr17 | 10886446  | + | Y | Y | Y | Y | Y | del_inssu  | u | FoSteS | intergenic    | RP11-963H4.3,AC00528  | ++      | lincRNA,mif | 106204;66689 | intergenic    | RP11-963H4.3,AC00528  | ++      | lincRNA,mif   | 102234;70659 |
| 1443 | chr19 | 15473230  | + | chr19 | 58657873  | + | N | N | N | Y | N | del_inssu  | d | FoSteS | intronic      | AKAP8                 | +-      | protein_cod | 0            | intronic      | ZNF329                | +-      | protein_cod   | 0            |
| 1444 | chr2  | 27616460  | + | chr2  | 181738244 | + | N | N | N | Y | N | del_inssu  | d | FoSteS | intronic      | PPM1G                 | +-      | protein_cod | 0            | upstream      | FTH1P20               | +-      | pseudogene    | 0            |
| 1445 | chr2  | 90449668  | + | chr2  | 91670354  | + | N | N | Y | N | N | del_inssu  | u | FoSteS | intergenic    | AC113612.1,CH17-132   | +-      | pseudogene  | 149266;8533  | intergenic    | AC018696.1,IGKV1OR2-  | +-      | pseudogene    | 34205;8733   |
| 1446 | chr2  | 181738223 | + | chr2  | 27616320  | + | N | N | N | Y | N | del_inssu  | u | FoSteS | upstream      | FTH1P20               | +-      | pseudogene  | 0            | intronic      | PPM1G                 | +-      | protein_cod   | 0            |
| 1447 | chr2  | 240564102 | + | chr2  | 240565286 | + | N | N | N | Y | N | del_inssu  | u | FoSteS | intergenic    | AC079612.2,RP11-315f  | +-      | lincRNA,inc | 11569;92548  | intergenic    | AC079612.2,RP11-315f  | +-      | lincRNA,inc   | 12753;91364  |
| 1448 | chr2  | 240564981 | + | chr2  | 240564049 | + | N | N | N | Y | N | del_inssu  | u | FoSteS | intergenic    | AC079612.2,RP11-315f  | +-      | lincRNA,inc | 12448;91669  | intergenic    | AC079612.2,RP11-315f  | +-      | lincRNA,inc   | 11516;92601  |
| 1449 | chr22 | 22707485  | + | chr22 | 22730576  | + | Y | Y | N | N | Y | del_inssu  | u | FoSteS | exonic        | IGLV5-48              | +-      | IG_V_gene   | 0            | exonic        | IGLV5-45              | +-      | IG_V_gene     | 0            |
| 1450 | chr22 | 22729248  | + | chr22 | 22706445  | + | Y | Y | N | N | Y | del_inssu  | u | FoSteS | intergenic    | LL22NC03-22A12.12,l   | +-      | pseudogene  | 3760;1107    | upstream      | IGLV5-48              | +       | IG_V_gene     | 0            |
| 1451 | chr22 | 22731629  | + | chr22 | 22783091  | + | N | Y | N | N | N | del_inssu  | u | FoSteS | downstream    | IGLV5-45              | +-      | IG_V_gene   | 0            | downstream    | IGLV5-37              | +       | IG_V_gene     | 0            |
| 1452 | chr22 | 22752559  | + | chr22 | 22703224  | + | N | N | Y | N | N | del_inssu  | u | FoSteS | upstream;dc   | IGLV17-41.1,IGLV1-42  | +-      | IG_V_pseu   | 0            | downstream    | LL22NC03-75A1.9       | +       | pseudogene    | 0            |
| 1453 | chr4  | 32065877  | + | chr4  | 32071042  | + | Y | Y | Y | Y | N | del_inssu  | u | FoSteS | ncRNA_intr    | RP11-734I18.1         | +       | lincRNA     | 0            | ncRNA_intr    | RP11-734I18.1         | +       | lincRNA       | 0            |
| 1454 | chr4  | 32070976  | + | chr4  | 32065773  | + | Y | Y | Y | Y | N | del_inssu  | u | FoSteS | ncRNA_intr    | RP11-734I18.1         | +       | lincRNA     | 0            | ncRNA_intr    | RP11-734I18.1         | +       | lincRNA       | 0            |
| 1455 | chr4  | 91933840  | + | chr4  | 91936472  | + | Y | N | N | N | Y | del_inssu  | d | FoSteS | intronic      | CCSER1                | +       | protein_cod | 0            | intronic      | CCSER1                | +       | protein_cod   | 0            |
| 1456 | chr4  | 91933858  | + | chr4  | 91936481  | + | N | N | N | Y | Y | del_inssu  | d | FoSteS | intronic;intr | CCSER1                | +       | protein_cod | 0            | intronic      | CCSER1                | +       | protein_cod   | 0            |
| 1457 | chr4  | 91936098  | + | chr4  | 91933643  | + | Y | N | N | Y | Y | del_inssu  | d | FoSteS | intronic;intr | CCSER1                | +       | protein_cod | 0            | intronic;intr | CCSER1                | +       | protein_cod   | 0            |
| 1458 | chr5  | 151362245 | + | chr5  | 164610022 | + | Y | Y | Y | Y | Y | del_inssu  | d | FoSteS | ncRNA_intr    | CTB-1202.1            | +-      | lincRNA     | 0            | intergenic    | CTC-340A15.2,CTB-181I | +-      | antisense,lir | 11373;37561  |
| 1459 | chr5  | 154018773 | + | chr5  | 126064717 | + | N | N | N | Y | N | del_inssu  | u | FoSteS | intergenic    | MIR3141,MIR1303       | +-      | miRNA,mir   | 43141;46563  | intergenic    | RP11-772E11.1,HSPE1P  | -,-     | antisense     | 65457;8413   |
| 1460 | chr5  | 154018784 | + | chr5  | 126065053 | + | Y | N | Y | Y | N | del_inssu  | u | FoSteS | intergenic    | MIR3141,MIR1303       | +-      | miRNA,mir   | 43152;46552  | intergenic    | RP11-772E11.1,HSPE1P  | -,-     | pseudogene    | 65793;8077   |
| 1461 | chr6  | 53924806  | + | chr6  | 53934828  | + | Y | Y | Y | Y | Y | del_inssu  | d | FoSteS | ncRNA_intr    | MLIP-AS1              | -       | antisense   | 0            | ncRNA_intr    | MLIP-AS1              | -       | antisense     | 0            |
| 1462 | chr6  | 53928709  | + | chr6  | 53924658  | + | Y | Y | Y | Y | Y | del_inssu  | u | FoSteS | ncRNA_intr    | MLIP-AS1              | -       | antisense   | 0            | ncRNA_intr    | MLIP-AS1              | -       | antisense     | 0            |
| 1463 | chr7  | 62518861  | + | chr7  | 55830760  | + | N | N | N | N | Y | del_inssu  | u | FoSteS | ncRNA_intr    | RP11-196D18.2         | +-      | pseudogene  | 0            | intergenic    | CICP11,PSPHP1         | +-      | pseudogene    | 23471;1730   |
| 1464 | chr7  | 140189221 | + | chr7  | 140181588 | + | Y | N | Y | N | N | del_inssu  | u | FoSteS | intergenic;in | MKRN1,DENND2A         | -,-     | protein_cod | 9852;28999   | intergenic;ir | MKRN1,DENND2A         | -,-     | protein_cod   | 2219;36632   |
| 1465 | chr7  | 142099580 | + | chr7  | 142247245 | + | N | Y | Y | N | N | del_inssu  | u | FoSteS | exonic;exon   | TRBV7-8               | -       | TR_V_gene   | 0            | exonic;exon   | TRBV7-3               | -       | TR_V_gene     | 0            |
| 1466 | chr7  | 142175098 | + | chr7  | 142098243 | + | N | Y | N | N | N | del_inssu  | u | FoSteS | intergenic    | TRBV5-4,TRBV7-4       | -,-     | TR_V_gene   | 6053;1231    | intergenic    | TRBV4-2,TRBV7-8       | +-      | TR_V_gene     | 52427;1212   |
| 1467 | chr7  | 142206449 | + | chr7  | 142231481 | + | Y | N | N | N | N | del_inssu  | u | FoSteS | downstream    | TRBV10-2              | -,-     | TR_V_gene   | 0            | downstream    | TRBV10-1              | -       | TR_V_gene     | 0            |
| 1468 | chr7  | 142223548 | + | chr7  | 142196395 | + | Y | N | N | Y | N | del_inssu  | u | FoSteS | downstream    | TRBV11-1              | -,-     | TR_V_gene   | 0            | intergenic    | TRBV12-2,TRBV11-2     | +-      | TR_V_pseu     | 5315;1175    |
| 1469 | chr8  | 80136511  | + | chr8  | 80028972  | + | N | N | N | N | Y | del_inssu  | u | FoSteS | intergenic    | AC009941.1,RP11-111   | +-      | miRNA,linc  | 126823;73441 | intergenic    | AC009941.1,RP11-1114I | +-      | miRNA,linc    | 19284;180980 |
| 1470 | chr9  | 93179673  | + | chr9  | 93003026  | + | N | N | N | N | Y | del_inssu  | u | FoSteS | ncRNA_intr    | RP11-389K14.3         | +-      | lincRNA     | 0            | intergenic    | SNORA26,RP11-497K15   | +-      | snoRNA,ps     | 154526;8523  |
| 1471 | chr9  | 112286045 | + | chr9  | 112286687 | + | Y | Y | Y | Y | Y | del_inssu  | u | FoSteS | intergenic    | MIR3927,YBX1P6        | -,-     | miRNA,ps    | 12220;9065   | intergenic    | MIR3927,YBX1P6        | +-      | miRNA,ps      | 12862;8423   |
| 1472 | chr9  | 112286562 | + | chr9  | 112285846 | + | Y | Y | Y | Y | Y | del_inssu  | u | FoSteS | intergenic    | MIR3927,YBX1P6        | -,-     | miRNA,ps    | 12737;8548   | intergenic    | MIR3927,YBX1P6        | +-      | miRNA,ps      | 12021;9264   |
| 1473 | chrY  | 28794557  | + | chrY  | 28815990  | + | N | Y | N | N | N | del_inssu  | u | FoSteS | intergenic    | PARP4P1,NONE          | -,-NONE | pseudogene  | 13758;NONE   | intergenic    | PARP4P1,NONE          | -,-NONE | pseudogene    | 35191;N26A   |
| 1474 | chrY  | 28803184  | + | chrY  | 28787254  | + | N | Y | N | N | N | del_inssu  | u | FoSteS | intergenic    | PARP4P1,NONE          | -,-NONE | pseudogene  | 22385;NONE   | intergenic    | PARP4P1,NONE          | -,-NONE | pseudogene    | 6455;NONE    |
| 1475 | chr1  | 17051740  | - | chr1  | 234912188 | + | N | Y | N | Y | N | del_invers | d | FoSteS | intergenic    | ESPNP,FAM231C         | +-      | pseudogene  | 5088;8707    | intergenic    | LINC01132,RNY4P16     | +-      | lincRNA,mis   | 44798;61532  |
| 1476 | chr1  | 16871850  | + | chr1  | 17054470  | - | N | Y | N | Y | N | del_invers | d | FoSteS | intergenic    | FAM231B,RP5-87501.1   | +-      | protein_cod | 5780;3296    | intergenic    | ESPNP,FAM231C         | +-      | pseudogene    | 7818;5977    |
| 1477 | chr10 | 59257658  | - | chr10 | 59257982  | + | Y | Y | Y | Y | Y | del_invers | d | FoSteS | intergenic    | MIR3924,RP11-550A9    | +-      | miRNA,ps    | 193339;15259 | intergenic    | MIR3924,RP11-550A9.1  | +-      | miRNA,ps      | 193663;14935 |
| 1478 | chr10 | 59256945  | - | chr10 | 59257945  | + | Y | Y | Y | Y | Y | del_invers | d | FoSteS | intergenic    | MIR3924,RP11-550A9    | +-      | miRNA,ps    | 192626;15972 | intergenic    | MIR3924,RP11-550A9.1  | +-      | miRNA,ps      | 193626;14972 |
| 1479 | chr11 | 55444014  | - | chr11 | 55457753  | + | Y | Y | Y | Y | Y | del_invers | d | FoSteS | intergenic    | OR4V1P,OR4P1P         | +-      | pseudogene  | 1863;6701    | intergenic    | RP11-674C21.9,OR5D2F  | +-      | lincRNA,ps    | 4117;24719   |
| 1480 | chr11 | 55365426  | + | chr11 | 55445866  | - | Y | Y | Y | Y | Y | del_invers | d | FoSteS | intergenic    | OR4C16,OR4C11         | +-      | protein_cod | 24890;5404   | intergenic    | OR4V1P,OR4P1P         | +-      | pseudogene    | 3715;4849    |
| 1481 | chr12 | 47033046  | - | chr12 | 47033307  | + | Y | Y | Y | Y | Y | del_invers |   |        |               |                       |         |             |              |               |                       |         |               |              |

|      |       |           |   |       |           |   |   |   |   |   |   |      |   |                      |                                   |                     |              |              |               |                       |                       |             |              |               |
|------|-------|-----------|---|-------|-----------|---|---|---|---|---|---|------|---|----------------------|-----------------------------------|---------------------|--------------|--------------|---------------|-----------------------|-----------------------|-------------|--------------|---------------|
| 1507 | chr10 | 109799527 | - | chr2  | 231802114 | + | N | N | Y | N | N | inso | d | _LTR_LTR1(ncRNA_intr | RP11-215N21.1                     | -                   | lincRNA      | 0            | intronic      | GPR55                 | -                     | protein_cod | 0            |               |
| 1508 | chr10 | 109799586 | - | chr2  | 231802134 | + | Y | Y | N | Y | Y | inso | d | NA                   | ncRNA_intrRP11-215N21.1           | -                   | lincRNA      | 0            | intronic      | GPR55                 | -                     | protein_cod | 0            |               |
| 1509 | chr10 | 85222525  | - | chr4  | 4350755   | + | N | N | N | Y | Y | inso | d | NA                   | intergenic;inRAL356140.1,RP11-344 | -                   | miRNA,lincf  | 25640;209637 | intronic;intr | NSG1                  | +                     | protein_cod | 0            |               |
| 1510 | chr10 | 60902409  | - | chr7  | 81789148  | + | Y | Y | Y | Y | Y | inso | d | NA                   | intergenic                        | TRAF6P1,PHYHIPL     | +,           | pseudogene   | 4467;33941    | intronic              | CACNA2D1              | -           | protein_cod  | 0             |
| 1511 | chr11 | 13023176  | + | chr18 | 53590853  | - | Y | Y | Y | Y | Y | inso | u | NA                   | ncRNA_intrCTC-497E21.3            | -                   | lincRNA      | 0            | ncRNA_intr    | CTD-2008L17.1         | +                     | lincRNA     | 0            |               |
| 1512 | chr11 | 41093789  | + | chr20 | 44244741  | - | Y | Y | Y | Y | Y | inso | u | NA                   | intronic                          | LRRC4C              | -            | protein_cod  | 0             | intronic              | WDFC9                 | -           | protein_cod  | 0             |
| 1513 | chr11 | 131178152 | + | chr20 | 48731505  | - | N | Y | Y | Y | N | inso | u | NA                   | ncRNA_intrAP002856.5              | -                   | lincRNA      | 0            | intronic      | TMEM189-UBE2V1,TME    | -,                    | protein_cod | 0            |               |
| 1514 | chr11 | 103792603 | + | chr6  | 108906546 | - | N | Y | N | Y | Y | inso | u | _L_SINE_AluY         | intronic;intr                     | PDGFD               | -            | protein_cod  | 0             | intronic;intr         | FOXO3                 | +           | protein_cod  | 0             |
| 1515 | chr12 | 73290995  | + | chr3  | 95726962  | - | Y | Y | Y | Y | Y | inso | u | NA                   | intergenic                        | AC131213.1,RP11-314 | -,           | miRNA,proc   | 106570;218742 | intergenic            | MTHFD2P1,AC108739.1   | +           | pseudogene   | 324925;158699 |
| 1516 | chr13 | 44069838  | + | chr15 | 41871536  | - | Y | N | N | Y | Y | inso | u | NA                   | intronic;intr                     | ENOX1               | -            | protein_cod  | 0             | downstream            | TYRO3                 | +,          | protein_cod  | 0             |
| 1517 | chr13 | 74313856  | + | chr8  | 15289365  | + | Y | Y | Y | Y | Y | inso | d | NA                   | intronic                          | KLF12               | -            | protein_cod  | 0             | intergenic            | RP11-782K4.1,AC091555 | +,          | pseudogene   | 106287;90028  |
| 1518 | chr13 | 68823792  | + | chr8  | 6239912   | - | N | N | N | Y | N | inso | u | NA                   | intergenic;in                     | OR7E33P,ELL2P3      | +,           | pseudogene   | 337712;40019  | intergenic;ir         | RP11-124B13.1,RP11-11 | -,          | lincRNA,ant  | 124854;21160  |
| 1519 | chr13 | 91149415  | + | chrX  | 43448546  | - | N | Y | Y | N | Y | inso | u | NA                   | ncRNA_intrLINC01049               | -                   | lincRNA      | 0            | intergenic    | NANOGP10,MAOA         | +,                    | pseudogene  | 180738;66921 |               |
| 1520 | chr14 | 93712480  | - | chr1  | 9121447   | + | Y | Y | Y | Y | Y | inso | d | NA                   | exonic                            | TBD70               | -            | protein_cod  | 0             | intronic              | SLC2A5                | -           | protein_cod  | 0             |
| 1521 | chr14 | 55382195  | - | chr20 | 49282703  | + | N | Y | N | N | Y | inso | d | VNTR                 | intergenic                        | GCH1,WDHD1          | -,           | protein_cod  | 0             | intronic              | FAM65C                | -           | protein_cod  | 0             |
| 1522 | chr14 | 93652601  | - | chr3  | 169729734 | + | Y | Y | Y | Y | Y | inso | d | NA                   | intronic                          | TMEM251,RP11-371E   | +,           | protein_cod  | 0             | intergenic;ir         | SEC62,GPR160          | +,          | protein_cod  | 13573;25983   |
| 1523 | chr15 | 41851396  | - | chr13 | 44069827  | + | Y | N | N | Y | Y | inso | d | NA                   | UTR5                              | TYRO3               | +            | protein_cod  | 0             | intronic              | ENOX1                 | -           | protein_cod  | 0             |
| 1524 | chr15 | 79784432  | + | chr5  | 96849706  | - | N | Y | N | Y | N | inso | u | NA                   | intergenic;in                     | KIAA1024,RP11-621H  | +,           | protein_cod  | 0             | ncRNA_intr            | RP11-1E3.1            | +           | lincRNA      | 0             |
| 1525 | chr15 | 40854194  | + | chr7  | 26252971  | - | Y | N | Y | Y | N | inso | u | NA                   | intronic;intr                     | C15orf57            | +            | protein_cod  | 0             | UTR3;UTR;             | CBX3                  | -           | protein_cod  | 0             |
| 1526 | chr16 | 32823564  | + | chr1  | 121138779 | - | Y | N | N | N | N | inso | u | NA                   | ncRNA_intrRP11-67H24.2            | -                   | lincRNA      | 0            | ncRNA_exo     | AL592494.5            | +                     | lincRNA     | 0            |               |
| 1527 | chr16 | 25290520  | + | chr18 | 15198115  | - | N | Y | N | N | N | inso | u | NA                   | intergenic                        | NONE,RP11-260A9.1   | +,           | NONE,pseu    | NONE;18200    | upstream              | RP11-454P7.3          | -           | pseudogene   | 0             |
| 1528 | chr18 | 53590610  | - | chr11 | 13023168  | + | Y | Y | Y | Y | Y | inso | d | NA                   | ncRNA_intrCTD-2008L17.1           | -                   | lincRNA      | 0            | ncRNA_intr    | CTC-497E21.3          | -                     | lincRNA     | 0            |               |
| 1529 | chr18 | 15197856  | - | chr17 | 25290257  | + | Y | N | N | N | N | inso | d | NA                   | upstream                          | RP11-454P7.3        | -            | pseudogene   | 0             | intergenic            | NONE,RP11-260A9.1     | NONE,+      | NONE,pseu    | NONE;18463    |
| 1530 | chr18 | 39769758  | - | chr6  | 153748709 | + | Y | N | Y | N | N | inso | d | _L_LTR_LTR2          | ncRNA_intrLINC00907               | -                   | lincRNA      | 0            | intergenic;ir | RNA5SP225,RP11-331O   | +,                    | rRNA,pseu   | 7002;238133  |               |
| 1531 | chr18 | 71711514  | + | chr9  | 127885509 | - | N | Y | N | N | N | inso | u | NA                   | intergenic;in                     | RP11-25L3.3,FBXO15  | +,           | lincRNA,prc  | 10118;29074   | intronic;intr         | SCAI                  | -           | protein_cod  | 0             |
| 1532 | chr19 | 21480236  | - | chr7  | 6428938   | + | Y | N | N | N | N | inso | u | NA                   | intronic;intr                     | ZNF708              | -            | protein_cod  | 0             | intronic;intr         | ZNF138                | +           | protein_cod  | 0             |
| 1533 | chr2  | 23698250  | + | chr1  | 200067677 | - | Y | Y | N | N | Y | inso | d | NA                   | intronic                          | KLHL29              | +            | protein_cod  | 0             | intronic              | NR5A2                 | -           | protein_cod  | 0             |
| 1534 | chr2  | 231802143 | + | chr10 | 109799890 | - | Y | Y | Y | Y | Y | inso | u | NA                   | intronic                          | GPR55               | -            | protein_cod  | 0             | ncRNA_exo             | RP11-215N21.1         | -           | lincRNA      | 0             |
| 1535 | chr2  | 47810004  | + | chr22 | 24198551  | - | Y | Y | N | Y | N | inso | u | TEI_complex          | intergenic                        | AC138655.1,AC07925  | +,           | protein_cod  | 0             | upstream;di           | SLC2A11,KB-1125A3.11  | +,          | protein_cod  | 0             |
| 1536 | chr2  | 41453286  | - | chr3  | 83756635  | + | N | N | Y | N | N | inso | d | NA                   | intergenic                        | HNRNPA1P57,AC010    | +,           | pseudogene   | 68591;370240  | intergenic            | CYP51A1P1,SRRM1P2     | -,          | pseudogene   | 899463;229561 |
| 1537 | chr2  | 160148181 | - | chr3  | 58772434  | + | N | Y | Y | Y | Y | inso | d | NA                   | intergenic                        | WDSUB1,BAZ2B        | +,           | protein_cod  | 0             | intronic              | C3orf67               | -           | protein_cod  | 0             |
| 1538 | chr2  | 78091920  | - | chr4  | 174044125 | + | N | Y | N | N | N | inso | d | EL_SINE_Alu          | intergenic                        | AC105399.2,AC07362  | +,           | pseudogene   | 71707;51140   | intergenic            | GALNTL6,RP11-10K16.1  | +,          | protein_cod  | 81505;8864    |
| 1539 | chr20 | 44244483  | - | chr11 | 41093789  | + | Y | Y | Y | Y | Y | inso | d | NA                   | intronic                          | WDFC9               | -            | protein_cod  | 0             | intronic              | LRRC4C                | -           | protein_cod  | 0             |
| 1540 | chr20 | 48731311  | - | chr11 | 131178153 | + | N | Y | N | Y | N | inso | d | NA                   | intronic                          | TMEM189-UBE2V1,T    | -,           | protein_cod  | 0             | ncRNA_intr            | AP002856.5            | +           | lincRNA      | 0             |
| 1541 | chr20 | 54914483  | - | chr4  | 147953943 | + | Y | Y | Y | Y | N | inso | d | NA                   | intergenic                        | RP11-380D15.3,FAM2  | +,           | lincRNA,prc  | 40267;19488   | intergenic            | RP11-292D4.3,MIR548G  | +,          | lincRNA,mif  | 23646;311838  |
| 1542 | chr20 | 52021438  | - | chr6  | 88217551  | + | Y | Y | Y | Y | Y | inso | d | NA                   | ncRNA_intrRP4-669H2.1,RP4-67E     | -                   | antisense,ai | 0            | intronic      | SLC35A1               | +                     | protein_cod | 0            |               |
| 1543 | chr22 | 29065701  | - | chr1  | 247869898 | + | N | N | N | Y | N | inso | d | NA                   | intronic                          | TTC28               | -            | protein_cod  | 0             | ncRNA_intr            | RP11-634B7.4          | -           | antisense    | 0             |
| 1544 | chr22 | 24195862  | - | chr2  | 47809988  | + | Y | Y | N | Y | N | inso | d | TEI_complex          | intergenic                        | DERL3,KB-1125A3.11  | -            | protein_cod  | 0             | intergenic            | AC138655.1,AC079250.1 | +,          | protein_cod  | 7990;107867   |
| 1545 | chr3  | 196049944 | - | chr1  | 247568918 | + | N | N | N | N | Y | inso | d | NA                   | ncRNA_intrTM4SF19-AS1             | -                   | antisense    | 0            | intergenic    | ZNF496,NLRP3          | +,                    | protein_cod | 73873;10540  |               |
| 1546 | chr3  | 95726711  | - | chr12 | 73290997  | + | Y | Y | Y | Y | Y | inso | d | NA                   | intergenic                        | MTHFD2P1,AC108739   | +,           | pseudogene   | 324674;158950 | intergenic            | AC131213.1,RP11-314D  | +,          | miRNA,proc   | 106572;218740 |
| 1547 | chr3  | 169729756 | + | chr14 | 93653426  | - | Y | Y | Y | Y | Y | inso | d | NA                   | intergenic                        | SEC62,GPR160        | +,           | protein_cod  | 0             | intergenic            | TMEM251               | +           | protein_cod  | 0             |
| 1548 | chr3  | 58772448  | + | chr2  | 160148934 | - | N | Y | Y | Y | Y | inso | u | NA                   | intronic                          | C3orf67             | -            | protein_cod  | 0             | intergenic            | WDSUB1,BAZ2B          | -,          | protein_cod  | 5624;26556    |
| 1549 | chr3  | 7977706   | + | chr6  | 18358570  | - | N | N | Y | N | N | inso | u | NA                   | intergenic                        | GRM7,LMCD1-AS1      | +,           | protein_cod  | 0             | intergenic;ir         | RNU6-263P,RP11-528A1  | +,          | snRNA,pse    | 61260;5078    |
| 1550 | chr4  | 4350924   | + | chr10 | 85222652  | - | N | N | N | Y | N | inso | u | NA                   | intronic                          | NSG1                | +            | protein_cod  | 0             | intergenic            | AL356140.1,RP11-344L1 | +,          | miRNA,lincf  | 25767;209510  |
| 1551 | chr4  | 147953941 | + | chr20 | 54914679  | - | Y | Y | Y | N | N | inso | u | NA                   | intergenic                        | RP11-292D4.3,MIR548 | +,           | lincRNA,mif  | 23644;311840  | intergenic            | RP11-380D15.3,FAM210  | +,          | lincRNA,prc  | 40463;19292   |
| 1552 | chr5  | 49771162  | - | chr1  | 121214999 | + | Y | N | N | N | Y | inso | d | NA                   | intergenic                        | EMB,RP11-269M20.2   | +,           | protein_cod  | 0             | intergenic            | AL592494.5,RP11-344P1 | +,          | lincRNA,linc | 10016;21178   |
| 1553 | chr5  | 96849601  | - | chr15 | 79784427  | + | N | Y | N | Y | N | inso | d | NA                   | ncRNA_intrRP11-1E3.1              | -                   | lincRNA      | 0            | intergenic    | KIAA1024,RP11-621H8.2 | +,                    | protein_cod | 19795;67171  |               |
| 1554 | chr6  | 108906228 | - | chr11 | 103792587 | + | N | Y | N | Y | Y | inso | d | _L_SINE_AluY         | intronic                          | FOXO3               | -            | protein_cod  | 0             | intronic              | PDGFD                 | -           | protein_cod  | 0             |
| 1555 | chr6  | 10762811  | + | chr11 | 118293792 | - | N | Y | N | N | Y | inso | u | NA                   | intronic                          | TMEM14B,SYCP2L,R    | +,           | protein_cod  | 0             | intronic              | ATP5L                 | +           | protein_cod  | 0             |
| 1556 | chr6  | 153748714 | + | chr18 | 39770209  | - | Y | Y | Y | N | N | inso | u | _L_LTR_LTR2          | intergenic                        | NANOSP225,RP11-33'  | +,           | rRNA,pseu    | 7007;238128   | ncRNA_intrLINC00907   | -                     | lincRNA     | 0            |               |
| 1557 | chr6  | 88217546  | + | chr20 | 52021643  | - | Y | Y | Y | Y | Y | inso | u | NA                   | intronic                          | SLC35A1             | +            | protein_cod  | 0             | ncRNA_intr            | RP4-669H2.1,RP4-678D  | -,          | antisense,ai | 0             |
| 1558 | chr6  | 18358315  | - | chr3  | 7977965   | + | N | Y | N | N | N | inso | d | NA                   | intergenic                        | RNU6-263P,RP11-528  | -,           | snRNA,pse    | 51005;5333    | intergenic            | GRM7,LMCD1-AS1        | +,          | protein_cod  | 194480;16797  |
| 1559 | chr7  | 81789163  | + | chr10 | 60902930  | - | Y | Y | Y | Y | Y | inso | d | NA                   | intronic                          | CACNA2D1            | -            | protein_cod  | 0             | intergenic            | TRAF6P1,PHYHIPL       | +,          | pseudogene   | 4988;33420    |
| 1560 | chr7  | 26241365  | - | chr15 | 40854180  | + | Y | N | Y | N | N | inso | d | NA                   | UTR5                              | ZNF138              | +            | protein_cod  | 0             | intronic;intr         | C15orf57              | -           | protein_cod  | 0             |
| 1561 | chr7  | 64289931  | + | chr19 | 22201713  | - | Y | N | Y | N | N | inso | u | NA                   | intronic                          | CBX3                | +            | protein_cod  | 0             | ncRNA_intr            | AC03973.4             | -           | lincRNA      | 0             |
| 1562 | chr8  | 15289361  | + | chr13 | 74314059  | - | Y | Y | Y | Y | Y | inso | u | NA                   | intergenic                        | RP11-782K4.1,AC091  | +,           | pseudogene   | 106283;90032  | intronic              | KLF12                 | -           | protein_cod  | 0             |
| 1563 | chr9  | 100675547 | + | chr1  | 86399021  | - | N | N | Y | Y | N | inso | u | NA                   | UTR3                              | C3orf156            | -            | protein_cod  | 0             | intronic              | COL24A1               | -           | protein_cod  | 0             |
| 1564 | chr9  | 127885332 | - | chr18 | 71711499  | + | N | Y | Y | N | N | inso | d | NA                   | intronic                          | SCAI                | -            | protein_cod  | 0             | intergenic            | RP11-25L3.3,FBXO15    | -,          | lincRNA,prc  | 10103;29089   |
| 1565 | chrX  | 43448483  | - | chr13 | 91149407  | + | N | Y | Y | N | Y | inso | d | NA                   | intergenic                        | NANOGP10,MAOA       | -,           | pseudogene   | 180675;66984  | ncRNA_intrLINC01049   | -                     | lincRNA     | 0            |               |
| 1566 | chrX  | 3195458   | - | chrY  | 14172718  | + | N | N | N | Y | N | inso | d | NA                   | intronic                          | CXorf28             | +            | protein_cod  | 0             | intergenic            | MXRASP1,RPS24P1       | +,          | pseudogene   | 64626;192739  |
| 1567 | chrX  | 3196038   | - | chrY  | 14172692  | + | N | N | N | Y | N | inso | d | NA                   | intronic                          | CXorf28             | +            | protein_cod  | 0             | intergenic            | MXRASP1,RPS24P1       | +,          | pseudogene   | 64600;192765  |
| 1568 | chrY  | 14172715  | + | chrX  | 31961115  | - | N | N | Y | Y | N | inso | u | NA                   | intergenic                        | MXRASP1,RPS24P1     | +,           | pseudogene   | 64623;192742  | intronic              | CXorf28               | -           |              |               |

|      |       |           |   |       |           |   |   |   |   |   |   |   |       |   |             |                |                       |        |              |               |                |                        |        |               |               |
|------|-------|-----------|---|-------|-----------|---|---|---|---|---|---|---|-------|---|-------------|----------------|-----------------------|--------|--------------|---------------|----------------|------------------------|--------|---------------|---------------|
| 1591 | chr1  | 149220989 | + | chr1  | 17225875  | - | N | N | N | N | N | Y | insou | u | NA          | intergenic     | RNU1-92P,RNVU1-18     | -,-    | snRNA,snR    | 6689;3069     | intergenic     | RNU1-2,RP11-108M9.6    | +,+    | snRNA,lincf   | 3237;4959     |
| 1592 | chr12 | 25956127  | - | chr12 | 125801148 | + | Y | N | N | N | N | N | insou | d | NA          | ncRNA_intrn    | RP11-443N24.2         | -      | lincRNA      | 0             | intergenic;ir  | NONE,TMEM132B          | NONE,+ | NONE,prote    | NONE;10014    |
| 1593 | chr12 | 104359630 | - | chr12 | 125801148 | + | N | Y | Y | Y | Y | N | insou | d | NA          | UTR5           | TDG                   | +      | protein_cod  | 0             | intergenic;ir  | NONE,TMEM132B          | NONE,+ | NONE,prote    | NONE;10014    |
| 1594 | chr12 | 125801164 | + | chr12 | 25959140  | - | Y | N | N | N | N | N | insou | u | NA          | intergenic;in  | NONE,TMEM132B         | NONE,+ | NONE,prote   | NONE;9998     | ncRNA_intrn    | RP11-443N24.2          | -      | lincRNA       | 0             |
| 1595 | chr12 | 125801164 | + | chr12 | 104382542 | - | N | Y | Y | Y | Y | N | insou | u | NA          | intergenic;in  | NONE,TMEM132B         | NONE,+ | NONE,prote   | NONE;9998     | UTR3           | TDG                    | +      | protein_cod   | 0             |
| 1596 | chr14 | 47117868  | + | chr14 | 63226284  | + | N | Y | N | N | N | N | insou | d | El_SINE_Al  | intergenic     | LINC00871,RPL10L      | +,+    | lincRNA,prc  | 146842;2354   | intronic       | KCNH5                  | -      | protein_cod   | 0             |
| 1597 | chr12 | 169974339 | - | chr2  | 116981881 | + | N | Y | N | N | N | N | insou | d | NA          | intergenic     | DPP10,RP11-338I24.1   | +,+    | protein_cod  | 371011;470455 | intergenic     | DPP10,RP11-338I24.1    | +,+    | protein_cod   | 378553;462913 |
| 1598 | chr2  | 131886577 | - | chr2  | 131887307 | + | N | Y | N | N | N | N | insou | d | NA          | intronic       | PLEKH2                | +      | protein_cod  | 0             | intronic       | PLEKH2                 | +      | protein_cod   | 0             |
| 1599 | chr2  | 116982308 | + | chr2  | 116982308 | + | N | Y | N | N | N | N | insou | u | NA          | intergenic     | DPP10,RP11-338I24.1   | +,+    | protein_cod  | 378980;462486 | intergenic     | DPP10,RP11-338I24.1    | +,+    | protein_cod   | 374970;466496 |
| 1600 | chr2  | 131887330 | + | chr2  | 131886643 | - | N | Y | N | N | N | N | insou | u | NA          | intronic       | PLEKH2                | +      | protein_cod  | 0             | intronic       | PLEKH2                 | +      | protein_cod   | 0             |
| 1601 | chr5  | 169597468 | - | chr5  | 169598756 | + | Y | Y | Y | Y | Y | Y | insou | d | NA          | intergenic     | KRT18P41,CTB-27N1.    | +,+    | pseudogene   | 28524;21115   | intergenic     | KRT18P41,CTB-27N1.1    | +,+    | pseudogene    | 29812;19827   |
| 1602 | chr5  | 169598750 | + | chr5  | 169597696 | - | Y | Y | Y | Y | Y | Y | insou | u | NA          | intergenic     | KRT18P41,CTB-27N1.    | +,+    | pseudogene   | 29806;19833   | intergenic     | KRT18P41,CTB-27N1.1    | +,+    | pseudogene    | 28752;20887   |
| 1603 | chr7  | 151010035 | + | chr7  | 151012106 | + | Y | Y | Y | Y | Y | Y | insou | d | NA          | intergenic     | SMARCD3,NUB1          | +,+    | protein_cod  | 35053;28750   | intergenic     | SMARCD3,NUB1           | +,+    | protein_cod   | 37124;26679   |
| 1604 | chr7  | 151012103 | + | chr7  | 151010436 | - | Y | Y | Y | Y | Y | Y | insou | u | NA          | intergenic     | SMARCD3,NUB1          | +,+    | protein_cod  | 37121;26682   | intergenic     | SMARCD3,NUB1           | +,+    | protein_cod   | 35454;28349   |
| 1605 | chr9  | 107816637 | - | chr9  | 107817347 | + | Y | Y | Y | Y | Y | Y | insou | d | NA          | intergenic     | RP11-217B7.3,RN7SK    | +,+    | lincRNA,mis  | 62575;42400   | intergenic     | RP11-217B7.3,RN7SKP1   | +,+    | lincRNA,mis   | 63285;41690   |
| 1606 | chr9  | 107817341 | + | chr9  | 107816979 | - | Y | Y | Y | Y | Y | Y | insou | u | NA          | intergenic     | RP11-217B7.3,RN7SK    | +,+    | lincRNA,mis  | 63279;41696   | intergenic     | RP11-217B7.3,RN7SKP1   | +,+    | lincRNA,mis   | 62917;42058   |
| 1607 | chr1  | 168025732 | + | chr19 | 24033178  | + | Y | Y | Y | Y | Y | Y | insd  | d | NA          | intronic       | DCAF6                 | +      | protein_cod  | 0             | ncRNA_intrn    | RP11-255H23.4          | -      | lincRNA       | 0             |
| 1608 | chr1  | 37938378  | + | chr2  | 68914881  | + | Y | N | Y | Y | N | N | insd  | d | NA          | ncRNA_intrn    | LINC01137             | -      | antisense    | 0             | intronic       | ARHGAP25               | +      | protein_cod   | 0             |
| 1609 | chr1  | 218884596 | + | chr3  | 25100012  | + | Y | Y | Y | Y | Y | Y | insd  | d | NA          | intergenic     | U3,RP11-412H9.1       | -,+    | snRNA,psr    | 169355;170346 | ncRNA_intrn    | AC133680.1             | +      | lincRNA       | 0             |
| 1610 | chr10 | 112178163 | + | chr7  | 92976835  | + | N | N | N | N | N | Y | insd  | d | TEI_complex | intergenic;in  | SMNDC1,RP11-525A1     | -,+    | protein_cod  | 113454;10435  | intronic;intrc | CCDC132                | +      | protein_cod   | 0             |
| 1611 | chr10 | 48378753  | + | chr12 | 45460238  | + | N | Y | Y | Y | Y | Y | insd  | u | NA          | intergenic     | OR4C4P,OR4C5          | -,+    | pseudogene   | 4754;8284     | ncRNA_intrn    | RP11-478B9.1           | +      | antisense     | 0             |
| 1612 | chr11 | 61735119  | + | chr2  | 181738245 | + | N | Y | N | N | N | Y | insd  | d | NA          | UTR5           | FTH1                  | -      | protein_cod  | 0             | upstream       | FTH1P20                | -      | pseudogene    | 0             |
| 1613 | chr11 | 38812669  | + | chr8  | 52730143  | + | Y | Y | Y | Y | Y | Y | insd  | u | NA          | intergenic     | RP11-641I7.1,RP11-31  | +,+    | lincRNA,psr  | 116878;370334 | UTR5;UTR;      | AC090186.1,PCMTD1      | +,+    | protein_cod   | 0             |
| 1614 | chr11 | 63660830  | + | chrX  | 10159335  | + | N | Y | N | N | N | N | insd  | u | NA          | intronic;intrc | MARK2                 | +      | protein_cod  | 0             | intronic;intrc | CLCN4                  | +      | protein_cod   | 0             |
| 1615 | chr11 | 63660831  | + | chrX  | 109628649 | + | N | N | N | Y | N | N | insd  | u | NA          | intronic       | MARK2                 | +      | protein_cod  | 0             | intronic       | AMMECR1,RGAG1          | +,+    | protein_cod   | 0             |
| 1616 | chr11 | 70835439  | + | chrY  | 13203786  | + | N | Y | N | Y | N | N | insd  | u | NA          | intronic       | SHANK2                | +      | protein_cod  | 0             | intergenic     | NONE,RP1-85D24.3       | NONE,- | NONE,pseu     | NONE;58955    |
| 1617 | chr12 | 45460369  | + | chr11 | 45487853  | + | N | Y | N | Y | Y | Y | insd  | d | NA          | ncRNA_intrn    | RP11-478B9.1          | +      | antisense    | 0             | intergenic     | OR4C4P,OR4C5           | +,+    | pseudogene    | 4754;8284     |
| 1618 | chr12 | 56990096  | + | chr15 | 39994625  | + | Y | Y | Y | Y | Y | Y | insd  | d | NA          | UTR3           | BAZZA                 | -      | protein_cod  | 0             | intronic       | FSIP1                  | -      | protein_cod   | 0             |
| 1619 | chr14 | 64066516  | + | chr18 | 13152438  | + | N | N | N | N | N | Y | insd  | d | NA          | exonic         | WDR89                 | -      | protein_cod  | 0             | ncRNA_exo      | RP11-807E13.2          | -      | pseudogene    | 0             |
| 1620 | chr14 | 67968244  | + | chr19 | 4965544   | + | N | N | N | Y | N | N | insd  | d | NA          | intronic       | TMEM229B              | -      | protein_cod  | 0             | intergenic     | UHRF1,KDM4B            | +,+    | processed_    | 3379;3581     |
| 1621 | chr14 | 72962479  | + | chr4  | 60491838  | + | N | N | N | N | Y | N | insd  | d | NA          | intronic;intrc | RG56                  | +      | protein_cod  | 0             | ncRNA_intrn    | RP11-725D20.1          | -      | lincRNA       | 0             |
| 1622 | chr15 | 39994637  | + | chr12 | 56989716  | + | Y | Y | Y | Y | Y | Y | insd  | u | NA          | intronic       | FSIP1                 | -      | protein_cod  | 0             | UTR3           | BAZZA                  | -      | protein_cod   | 0             |
| 1623 | chr17 | 32673386  | + | chr10 | 74767364  | + | N | N | N | N | Y | N | insd  | u | NA          | intergenic     | RP11-521P1.1,CCL13    | -,+    | pseudogene   | 14139;10085   | UTR3           | P4HA1                  | -      | protein_cod   | 0             |
| 1624 | chr17 | 74377422  | + | chr2  | 153997624 | + | Y | N | N | Y | N | Y | insd  | u | NA          | intronic       | PRPSAP1,SPHK1         | -,+    | protein_cod  | 0             | intergenic     | UQBUN4P2,ATP5F1P4      | +,+    | pseudogene    | 263343;17828  |
| 1625 | chr17 | 7167959   | + | chr8  | 30145402  | + | Y | Y | Y | Y | Y | Y | insd  | u | NA          | upstream       | CLDN7                 | -      | protein_cod  | 0             | intergenic     | CTD-2345M20.2,CTD-31   | +,+    | pseudogene    | 37794;44075   |
| 1626 | chr18 | 13152439  | + | chr14 | 64066317  | + | N | N | N | N | N | Y | insd  | u | NA          | ncRNA_exo      | RP11-807E13.2         | -      | pseudogene   | 0             | exonic         | WDR89                  | -      | protein_cod   | 0             |
| 1627 | chr18 | 23467619  | + | chr2  | 209970708 | + | N | Y | N | N | N | N | insd  | u | NA          | intergenic     | RN7SL97P,RP11-737G2   | -,+    | misc_RNA,4   | 69123;65561   | intergenic     | HSPA8P6,CRYGFP         | -,+    | pseudogene    | 31836;39257   |
| 1628 | chr19 | 24033181  | + | chr1  | 168024587 | + | Y | Y | Y | Y | Y | Y | insd  | u | NA          | ncRNA_intrn    | RP11-255H23.4         | -      | lincRNA      | 0             | intronic       | DCAF6                  | +      | protein_cod   | 0             |
| 1629 | chr19 | 4965591   | + | chr14 | 67968123  | + | N | Y | N | Y | N | N | insd  | u | NA          | intergenic     | UHRF1,KDM4B           | +,+    | processed_   | 3426;3534     | intronic       | TMEM229B               | +      | protein_cod   | 0             |
| 1630 | chr2  | 68914879  | + | chr1  | 37938257  | + | Y | N | Y | Y | N | N | insd  | u | NA          | intronic       | ARHGAP25              | +      | protein_cod  | 0             | ncRNA_intrn    | LINC01137              | -      | antisense     | 0             |
| 1631 | chr2  | 181738517 | + | chr11 | 61734941  | + | N | Y | N | N | N | Y | insd  | u | NA          | upstream       | FTH1P20               | -      | pseudogene   | 0             | UTR5           | FTH1                   | -      | protein_cod   | 0             |
| 1632 | chr2  | 137968271 | + | chr16 | 19263768  | + | N | N | N | Y | N | N | insd  | d | NA          | intronic       | TSHD07B               | -      | protein_cod  | 0             | intronic       | SYT17                  | +      | protein_cod   | 0             |
| 1633 | chr2  | 153997621 | + | chr17 | 743777274 | + | Y | N | N | Y | N | Y | insd  | u | NA          | intergenic     | UQBUN4P2,ATP5F1P4     | +,+    | pseudogene   | 263340;17831  | intronic       | PRPSAP1,SPHK1          | -,+    | protein_cod   | 0             |
| 1634 | chr2  | 209970999 | + | chr18 | 23467604  | + | N | Y | N | N | N | N | insd  | d | NA          | intergenic     | HSPA8P6,CRYGFP        | +,+    | pseudogene   | 32127;38966   | intergenic     | RN7SL97P,RP11-737G2    | -,+    | misc_RNA,4    | 69108;65576   |
| 1635 | chr2  | 204056057 | + | chr9  | 132191814 | + | N | Y | Y | Y | Y | Y | insd  | d | NA          | intronic       | NBEAL1                | -      | protein_cod  | 0             | intergenic     | RP11-65J3.6,RP11-65J3. | -,+    | pseudogene    | 49065;1117    |
| 1636 | chr21 | 44757304  | + | chr7  | 44294744  | + | N | N | N | Y | N | N | insd  | d | NA          | intergenic;in  | LINC00322,AP001046    | -,+    | lincRNA,linc | 5385;20723    | intronic       | CAMK2B                 | -      | protein_cod   | 0             |
| 1637 | chr21 | 44757304  | + | chr7  | 44294746  | + | Y | N | N | N | N | N | insd  | d | NA          | intergenic;in  | LINC00322,AP001046    | -,+    | lincRNA,linc | 5385;20723    | intronic       | CAMK2B                 | -      | protein_cod   | 0             |
| 1638 | chr22 | 32928560  | + | chr6  | 24683988  | + | Y | Y | Y | Y | Y | Y | insd  | d | NA          | intronic       | SYN3                  | -      | protein_cod  | 0             | intronic       | ACOT13                 | +      | protein_cod   | 0             |
| 1639 | chr3  | 25100001  | + | chr1  | 218883358 | + | Y | Y | Y | Y | Y | Y | insd  | u | NA          | ncRNA_intrn    | AC133680.1            | +      | lincRNA      | 0             | intergenic     | U3,RP11-412H9.1        | +,+    | snRNA,psr     | 168117;171584 |
| 1640 | chr3  | 56765638  | + | chr7  | 147539102 | + | Y | Y | Y | Y | Y | Y | insd  | u | NA          | UTR3           | ARHGEF3               | -      | protein_cod  | 0             | intronic       | CNTNAP2                | +      | protein_cod   | 0             |
| 1641 | chr4  | 60491828  | + | chr14 | 72962329  | + | N | N | N | Y | N | N | insd  | u | NA          | ncRNA_intrn    | RP11-725D20.1         | -      | lincRNA      | 0             | intronic       | RG56                   | +      | protein_cod   | 0             |
| 1642 | chr4  | 80894475  | + | chr5  | 21207714  | + | Y | Y | Y | Y | Y | Y | insd  | d | El_LINE_L1  | intronic       | ANTXR2                | +      | protein_cod  | 0             | intergenic     | RP11-811J10.1,RP11-37  | +,+    | pseudogene    | 10745;116268  |
| 1643 | chr5  | 9024647   | + | chr20 | 22863398  | + | N | Y | N | N | N | N | insd  | d | VNTR        | ncRNA_intrn    | CTD-2215L10.1         | +      | antisense    | 0             | intergenic     | KRT18P3,CYB5P4         | -,+    | pseudogene    | 148671;2910   |
| 1644 | chr5  | 21207730  | + | chr4  | 80888060  | + | Y | Y | Y | Y | Y | Y | insd  | u | El_LINE_L1  | intergenic     | RP11-811J10.1,RP11-37 | +,+    | pseudogene   | 10761;116252  | intronic       | ANTXR2                 | -      | protein_cod   | 0             |
| 1645 | chr6  | 24684003  | + | chr22 | 32927895  | + | Y | Y | Y | Y | Y | Y | insd  | u | NA          | intronic       | ACOT13                | +      | protein_cod  | 0             | intronic       | SYN3                   | +      | protein_cod   | 0             |
| 1646 | chr6  | 43962453  | + | chr8  | 14835593  | + | Y | Y | N | Y | N | N | insd  | d | NA          | intergenic     | RP11-344J7.2,RP5-11   | -,+    | lincRNA,ant  | 142383;1007   | intronic       | SGCZ                   | -      | protein_cod   | 0             |
| 1647 | chr6  | 89435365  | + | chrX  | 119277793 | + | N | Y | Y | N | N | N | insd  | d | NA          | intronic;intrc | RNGTT                 | -      | protein_cod  | 0             | ncRNA_exo      | RP4-755D9.1            | +      | antisense     | 0             |
| 1648 | chr7  | 147539665 | + | chr3  | 56756521  | + | Y | Y | Y | Y | Y | Y | insd  | d | NA          | intronic       | CNTNAP2               | +      | protein_cod  | 0             | UTR3           | ARHGEF3                | +      | protein_cod   | 0             |
| 1649 | chr8  | 52731484  | + | chr11 | 38812656  | + | Y | Y | Y | Y | Y | Y | insd  | d | NA          | UTR3           | PCMTD1                | -      | protein_cod  | 0             | intergenic     | RP11-641I7.1,RP11-313  | +,+    | lincRNA,psr   | 116865;370347 |
| 1650 | chr8  | 30145623  | + | chr17 | 7167890   | + | Y | Y | Y | Y | Y | Y | insd  | d | NA          | intergenic     | CTD-2345M20.2,CTD-    | -,+    | pseudogene   | 38015;43854   | upstream       | CLDN7                  | -      | protein_cod</ |               |



|      |       |           |   |       |           |   |   |   |   |   |   |          |    |    |                 |                     |     |             |               |               |                        |        |             |               |
|------|-------|-----------|---|-------|-----------|---|---|---|---|---|---|----------|----|----|-----------------|---------------------|-----|-------------|---------------|---------------|------------------------|--------|-------------|---------------|
| 1759 | chr12 | 30404042  | + | chr12 | 30501742  | - | N | N | Y | N | N | invers_f | na | NA | ncRNA_intrn     | RP11-776A13.3       | -   | lincRNA     | 0             | intergenic;ir | RP11-155I9.1,RP11-776A | +,+    | lincRNA,ps  | 27192;106110  |
| 1760 | chr12 | 50182140  | + | chr12 | 50182613  | - | Y | N | N | N | N | invers_f | na | NA | intergenic      | LSM6P2,NCKAP5L      | +,+ | pseudogene  | 17221;2789    | intergenic    | LSM6P2,NCKAP5L         | +,+    | pseudogene  | 17694;2316    |
| 1761 | chr12 | 50182498  | + | chr12 | 50182979  | - | N | N | N | Y | N | invers_f | na | NA | intergenic      | LSM6P2,NCKAP5L      | +,+ | pseudogene  | 17579;2431    | intergenic    | LSM6P2,NCKAP5L         | +,+    | pseudogene  | 18060;1950    |
| 1762 | chr12 | 50182595  | + | chr12 | 50183005  | - | N | N | Y | N | Y | invers_f | na | NA | intergenic      | LSM6P2,NCKAP5L      | +,+ | pseudogene  | 17676;2334    | intergenic    | LSM6P2,NCKAP5L         | +,+    | pseudogene  | 18086;1924    |
| 1763 | chr12 | 50182605  | + | chr12 | 50182963  | - | N | Y | N | N | N | invers_f | na | NA | intergenic      | LSM6P2,NCKAP5L      | +,+ | pseudogene  | 17686;2324    | intergenic    | LSM6P2,NCKAP5L         | +,+    | pseudogene  | 18044;1966    |
| 1764 | chr12 | 50182607  | + | chr12 | 50182884  | - | N | N | N | N | Y | invers_f | na | NA | intergenic      | LSM6P2,NCKAP5L      | +,+ | pseudogene  | 17688;2322    | intergenic    | LSM6P2,NCKAP5L         | +,+    | pseudogene  | 17965;2045    |
| 1765 | chr12 | 104382542 | + | chr12 | 125801164 | - | N | N | N | N | Y | invers_f | na | NA | UTR3            | TDG                 | +   | protein_cod | 0             | intergenic    | NONE,TMEM132B          | NONE,+ | NONE,prote  | NONE;9998     |
| 1766 | chr12 | 133141109 | + | chr12 | 133344190 | - | Y | Y | Y | N | N | invers_f | na | NA | intronic;intr   | FBSL1               | -   | protein_cod | 0             | intergenic;ir | ANKLE2,GOLGA3          | -      | protein_cod | 5716;1305     |
| 1767 | chr12 | 20124074  | + | chr13 | 21848635  | - | N | N | N | N | Y | invers_f | na | NA | intergenic      | TPT2,MRPS31P2       | +,+ | protein_cod | 13171;2637    | ncRNA_intrn   | ESRRAP2                | -      | pseudogene  | 0             |
| 1768 | chr13 | 20124109  | + | chr13 | 21848635  | - | N | N | Y | N | N | invers_f | na | NA | intergenic      | TPT2,MRPS31P2       | -   | protein_cod | 13206;2602    | ncRNA_intrn   | ESRRAP2                | +      | pseudogene  | 0             |
| 1769 | chr13 | 60870092  | + | chr13 | 66279828  | - | N | N | Y | N | N | invers_f | na | NA | intergenic      | TARDBPP2,TDRC3      | +,+ | pseudogene  | 19952;100499  | intergenic    | STARP1,HNRNPA3P5       | -      | pseudogene  | 394743;82236  |
| 1770 | chr13 | 89110969  | + | chr13 | 89112603  | - | Y | N | N | N | N | invers_f | na | NA | intergenic      | RPL29P29,LINC00433  | +,+ | pseudogene  | 221745;82150  | intergenic    | RPL29P29,LINC00433     | +,+    | pseudogene  | 223379;80516  |
| 1771 | chr13 | 89110988  | + | chr13 | 89112602  | - | N | N | N | N | Y | invers_f | na | NA | intergenic      | RPL29P29,LINC00433  | +,+ | pseudogene  | 221764;82131  | intergenic    | RPL29P29,LINC00433     | +,+    | pseudogene  | 223378;80517  |
| 1772 | chr14 | 21332108  | + | chr14 | 22226321  | - | N | N | N | N | Y | invers_f | na | NA | intergenic      | RNASE1,RP11-219E7   | +   | protein_cod | 60671;6329    | intergenic    | RPL4P1,TRAV6           | +,+    | pseudogene  | 6491;10408    |
| 1773 | chr14 | 24098368  | + | chr14 | 97971495  | - | Y | Y | Y | Y | Y | invers_f | na | NA | upstream        | DHRS2               | +   | protein_cod | 0             | ncRNA_intrn   | CTD-2506J14.1          | +      | lincRNA     | 0             |
| 1774 | chr14 | 65842536  | + | chr14 | 65843134  | - | Y | Y | Y | N | Y | invers_f | na | NA | intergenic;intr | MIR4708,FUT8        | +,+ | miRNA,prot  | 40635;34774   | intergenic;ir | MIR4708,FUT8           | +,+    | miRNA,prot  | 41233;34176   |
| 1775 | chr14 | 70945242  | + | chr14 | 90912038  | - | Y | Y | N | Y | Y | invers_f | na | NA | ncRNA_intrn     | RP11-486O13.4,ADAM  | +,+ | lincRNA,inc | 0             | intergenic;ir | CALM1,RP11-1078H9.1    | +,+    | protein_cod | 37433;6369    |
| 1776 | chr14 | 93926007  | + | chr14 | 93926766  | - | N | Y | N | N | N | invers_f | na | NA | intronic        | UNC79               | +   | protein_cod | 0             | intronic      | UNC79                  | +      | protein_cod | 0             |
| 1777 | chr15 | 31033857  | + | chr15 | 31956256  | - | N | N | N | Y | N | invers_f | na | NA | intergenic      | ARHGAP11B,GOLGA8    | +,+ | protein_cod | 56047;49919   | intronic      | OTUD7A                 | +      | protein_cod | 0             |
| 1778 | chr15 | 41853488  | + | chr15 | 75535375  | - | N | N | Y | N | N | invers_f | na | NA | exonic;exon     | TYRO3               | +   | protein_cod | 0             | ncRNA_exo     | TYRO3P                 | -      | pseudogene  | 0             |
| 1779 | chr15 | 75624536  | + | chr15 | 78241047  | - | Y | Y | Y | N | N | invers_f | na | NA | intergenic      | ANP32BP1,COMMD4     | +,+ | pseudogene  | 9502;3696     | intergenic    | RP11-114H24.4,RP11-11  | -      | pseudogene  | 4116;5377     |
| 1780 | chr15 | 75624591  | + | chr15 | 78240567  | - | N | N | N | Y | Y | invers_f | na | NA | intergenic      | ANP32BP1,COMMD4     | +,+ | pseudogene  | 9557;3641     | intergenic    | RP11-114H24.4,RP11-11  | -      | pseudogene  | 3643;5850     |
| 1781 | chr15 | 75624630  | + | chr15 | 78240562  | - | N | N | N | Y | N | invers_f | na | NA | intergenic      | ANP32BP1,COMMD4     | +,+ | pseudogene  | 9596;3602     | intergenic    | RP11-114H24.4,RP11-11  | -      | pseudogene  | 3638;5855     |
| 1782 | chr15 | 78276930  | + | chr15 | 79060392  | - | Y | N | N | N | N | invers_f | na | NA | ncRNA_exo       | ADAMTS7P3           | +   | pseudogene  | 0             | intronic      | ADAMTS7                | -      | protein_cod | 0             |
| 1783 | chr15 | 78276964  | + | chr15 | 79060427  | - | N | N | N | N | Y | invers_f | na | NA | ncRNA_intrn     | ADAMTS7P3           | +   | pseudogene  | 0             | intronic      | ADAMTS7                | -      | protein_cod | 0             |
| 1784 | chr15 | 78277288  | + | chr15 | 79060354  | - | N | Y | Y | N | N | invers_f | na | NA | ncRNA_intrn     | ADAMTS7P3           | +   | pseudogene  | 0             | intronic      | ADAMTS7                | -      | protein_cod | 0             |
| 1785 | chr16 | 21594442  | + | chr16 | 22710751  | - | N | Y | Y | Y | Y | invers_f | na | NA | intergenic      | CTB-31N19.2,SCARN   | +,+ | misc_pseud  | 32748;4506    | intergenic    | RN7SL245P,HS3ST2       | +,+    | misc_RNA,t  | 62686;114747  |
| 1786 | chr16 | 32354173  | + | chr16 | 33512831  | - | N | Y | Y | N | Y | invers_f | na | NA | intergenic      | RP11-17M15.2,RP11-1 | +,+ | pseudogene  | 32297;14129   | intergenic    | BMS1P8,ENPP7P13        | +,+    | pseudogene  | 11860;59057   |
| 1787 | chr16 | 47219290  | + | chr16 | 47719290  | - | N | Y | N | N | N | invers_f | na | NA | intronic        | ITFG1               | -   | protein_cod | 0             | intronic      | PHKB                   | +      | protein_cod | 0             |
| 1788 | chr16 | 48650446  | + | chr16 | 48650966  | - | N | Y | N | N | N | invers_f | na | NA | intergenic      | N4BP1,CTC-527H23.2  | +,+ | protein_cod | 6326;3784     | intergenic    | N4BP1,CTC-527H23.2     | +,+    | protein_cod | 6846;3264     |
| 1789 | chr16 | 48650805  | + | chr16 | 48651345  | - | N | N | Y | N | N | invers_f | na | NA | intergenic      | N4BP1,CTC-527H23.2  | +,+ | protein_cod | 6685;3425     | intergenic    | N4BP1,CTC-527H23.2     | +,+    | protein_cod | 7225;2885     |
| 1790 | chr17 | 15641441  | + | chr17 | 18541849  | - | N | N | Y | N | N | invers_f | na | NA | ncRNA_exo       | AC005324.6          | -   | antisense   | 0             | intronic      | TBC1D28                | -      | protein_cod | 0             |
| 1791 | chr17 | 36350387  | + | chr17 | 36406169  | - | Y | Y | Y | Y | Y | invers_f | na | NA | intronic;intr   | RP11-1407O15.2,TBC  | -   | protein_cod | 0             | intronic;intr | RP11-1407O15.2         | -      | protein_cod | 0             |
| 1792 | chr17 | 39240659  | + | chr17 | 39296495  | - | N | N | Y | N | N | invers_f | na | NA | exonic          | KRTAP4-7            | +   | protein_cod | 0             | exonic        | KRTAP4-6               | -      | protein_cod | 0             |
| 1793 | chr17 | 73249717  | + | chr17 | 74606941  | - | N | N | Y | N | N | invers_f | na | NA | intronic        | GGA3                | +   | protein_cod | 0             | intergenic    | RP11-666A8.11,ST6GAL   | -      | pseudogene  | 15087;13902   |
| 1794 | chr19 | 158222375 | + | chr19 | 16105182  | - | N | Y | N | N | N | invers_f | na | NA | intergenic;intr | CYP4F12,OR10H2      | +,+ | protein_cod | 14391;16459   | intergenic;ir | AC005336.5,AC005336.4  | +,+    | pseudogene  | 1134;6210     |
| 1795 | chr19 | 21495759  | + | chr19 | 21708833  | - | N | N | Y | N | Y | invers_f | na | NA | intronic        | ZNF708              | -   | protein_cod | 0             | intronic      | ZNF429                 | +      | protein_cod | 0             |
| 1796 | chr19 | 44915513  | + | chr19 | 44962048  | - | N | Y | N | N | N | invers_f | na | NA | ncRNA_intrn     | CTC-512J12.4        | -   | processed_l | 0             | intergenic    | ZNF229,ZNF285B         | +,+    | protein_cod | 9642;9450     |
| 1797 | chr2  | 87586698  | + | chr2  | 91740722  | - | N | N | N | Y | N | invers_f | na | NA | upstream        | AC068279.2          | -   | pseudogene  | 0             | ncRNA_exo     | AC018696.7             | +,+    | pseudogene  | 0             |
| 1798 | chr2  | 87642508  | + | chr2  | 90482241  | - | N | Y | N | N | N | invers_f | na | NA | intergenic      | AC068279.3,LINC0011 | +,+ | pseudogene  | 34618;112379  | intergenic    | CH17-132F21.1,AC23321  | +,+    | protein_cod | 23570;30254   |
| 1799 | chr2  | 87644971  | + | chr2  | 90482245  | - | Y | N | N | N | N | invers_f | na | NA | intergenic      | AC068279.3,LINC0011 | +,+ | pseudogene  | 37081;109916  | intergenic    | CH17-132F21.1,AC23321  | +,+    | protein_cod | 23574;30250   |
| 1800 | chr2  | 97932710  | + | chr2  | 98017256  | - | N | Y | N | N | N | invers_f | na | NA | intergenic      | ANKRD36,IGKV1OR2    | +,+ | protein_cod | 2452;54621    | intergenic    | AC159540.2,ANKRD36B    | +,+    | lincRNA,ps  | 6848;1722     |
| 1801 | chr2  | 116978297 | + | chr2  | 116982309 | - | Y | Y | N | Y | Y | invers_f | na | NA | intergenic      | DDP10,RP11-338I24.1 | +,+ | protein_cod | 374969;466497 | intergenic    | DPP10,RP11-338I24.1    | +,+    | pseudogene  | 378981;462485 |
| 1802 | chr2  | 129703594 | + | chr2  | 129722265 | - | N | Y | N | N | N | invers_f | na | NA | intergenic      | AC012451.1,AC06848  | -   | lincRNA,inc | 364444;117825 | intergenic    | AC012451.1,AC068483.1  | -      | lincRNA,inc | 383115;99154  |
| 1803 | chr2  | 129703664 | + | chr2  | 129722264 | - | N | N | N | Y | N | invers_f | na | NA | intergenic      | AC012451.1,AC06848  | -   | lincRNA,inc | 364514;117755 | intergenic    | AC012451.1,AC068483.1  | -      | lincRNA,inc | 383694;98575  |
| 1804 | chr2  | 129703701 | + | chr2  | 129722216 | - | N | N | Y | N | N | invers_f | na | NA | intergenic      | AC012451.1,AC06848  | -   | lincRNA,inc | 364551;117718 | intergenic    | AC012451.1,AC068483.1  | -      | lincRNA,inc | 383066;99203  |
| 1805 | chr2  | 129703832 | + | chr2  | 129722238 | - | N | N | N | N | Y | invers_f | na | NA | intergenic      | AC012451.1,AC06848  | -   | lincRNA,inc | 364682;117587 | intergenic    | AC012451.1,AC068483.1  | -      | lincRNA,inc | 383088;99181  |
| 1806 | chr2  | 131886772 | + | chr2  | 131887113 | - | N | N | Y | N | N | invers_f | na | NA | intronic        | PLEKH82             | +   | protein_cod | 0             | intronic      | PLEKH82                | +      | protein_cod | 0             |
| 1807 | chr2  | 153459917 | + | chr2  | 153461433 | - | N | N | N | Y | Y | invers_f | na | NA | intronic;intr   | FMNL2               | +   | protein_cod | 0             | intronic;intr | FMNL2                  | +      | protein_cod | 0             |
| 1808 | chr2  | 228075134 | + | chr2  | 228076143 | - | N | N | N | N | Y | invers_f | na | NA | intronic;intr   | COL4A3              | +   | protein_cod | 0             | intronic      | COL4A3                 | +      | protein_cod | 0             |
| 1809 | chr2  | 228075149 | + | chr2  | 228075928 | - | N | N | N | Y | N | invers_f | na | NA | intronic        | COL4A3              | +   | protein_cod | 0             | intronic      | COL4A3                 | +      | protein_cod | 0             |
| 1810 | chr2  | 228075279 | + | chr2  | 228075926 | - | N | Y | N | N | N | invers_f | na | NA | intronic        | COL4A3              | +   | protein_cod | 0             | intronic      | COL4A3                 | +      | protein_cod | 0             |
| 1811 | chr21 | 23626205  | + | chr21 | 29293560  | - | Y | Y | N | Y | Y | invers_f | na | NA | ncRNA_intrn     | AP000705.7          | +   | lincRNA     | 0             | intergenic    | LINC00113,AJ006995.3   | +,+    | lincRNA,inc | 170008;33680  |
| 1812 | chr21 | 25764454  | + | chr21 | 25764658  | - | N | Y | N | N | N | invers_f | na | NA | intergenic      | AP000469.2,AP000471 | +,+ | lincRNA,inc | 70764;36600   | intergenic    | AP000469.2,AP000471    | +,+    | lincRNA,inc | 70968;36396   |
| 1813 | chr21 | 28020677  | + | chr21 | 28023462  | - | N | N | N | N | Y | invers_f | na | NA | intergenic      | CYYR1,ADAMTS1       | +,+ | protein_cod | 75074;187389  | intergenic    | CYYR1,ADAMTS1          | +,+    | protein_cod | 77859;184604  |
| 1814 | chr22 | 17037101  | + | chr22 | 22613416  | - | N | N | N | N | Y | invers_f | na | NA | intergenic      | KB-67B5.17,KB-67B5  | +,+ | lincRNA,ps  | 28974;15816   | intergenic    | VPREB1,LL22NC03-2H8    | +,+    | protein_cod | 13489;24896   |
| 1815 | chr22 | 37355469  | + | chr22 | 48075284  | - | N | N | N | N | Y | invers_f | na | NA | intergenic      | CSF2RBP1,LL22NC01   | +,+ | pseudogene  | 5705;5820     | ncRNA_intrn   | RP11-19L9.4            | +,+    | lincRNA     | 0             |
| 1816 | chr3  | 22751278  | + | chr3  | 22782547  | - | N | N | Y | N | N | invers_f | na | NA | intergenic      | AC092421.1,RP11-103 | -   | pseudogene  | 39076;101603  | intergenic    | AC092421.1,RP11-1037I  | +,+    | pseudogene  | 70345;70334   |
| 1817 | chr3  | 45174956  | + | chr3  | 124331321 | - | Y | N | N | N | Y | invers_f | na | NA | intronic        | CDCP1               | -   | protein_cod | 0             | intronic      | KALRN                  | -      | protein_cod | 0             |
| 1818 | chr3  | 122466069 | + | chr3  | 122499616 | - | N | N | Y | N | N | invers_f | na |    |                 |                     |     |             |               |               |                        |        |             |               |

|      |       |           |   |       |           |   |   |   |   |   |   |          |    |    |            |                         |    |              |               |            |                          |    |             |               |
|------|-------|-----------|---|-------|-----------|---|---|---|---|---|---|----------|----|----|------------|-------------------------|----|--------------|---------------|------------|--------------------------|----|-------------|---------------|
| 1843 | chr7  | 23815882  | + | chr7  | 23838271  | - | N | N | N | N | Y | invers_f | na | NA | intronic   | STK31                   | +  | protein_cod  | 0             | intronic   | STK31                    | +  | protein_cod | 0             |
| 1844 | chr7  | 23816021  | + | chr7  | 23837611  | - | Y | N | N | N | N | invers_f | na | NA | intronic   | STK31                   | +  | protein_cod  | 0             | intronic   | STK31                    | +  | protein_cod | 0             |
| 1845 | chr7  | 28877846  | + | chr7  | 139205831 | - | Y | N | N | N | Y | invers_f | na | NA | intergenic | CREB5,TRIL              | +, | protein_cod  | 12335;115128  | intergenic | RP4-701O16.5,CLEC2L      | +, | pseudogene  | 17273;2771    |
| 1846 | chr7  | 34857498  | + | chr7  | 37692886  | - | Y | N | N | N | N | invers_f | na | NA | ncRNA_intr | NPSR1-AS1               | -  | processed_   | 0             | intergenic | ir NECAP1P1.GPR141       | -, | pseudogene  | 66954;30514   |
| 1847 | chr7  | 34857749  | + | chr7  | 37692886  | - | N | N | N | Y | N | invers_f | na | NA | ncRNA_intr | NPSR1-AS1               | -  | processed_   | 0             | intergenic | ir NECAP1P1.GPR141       | -, | pseudogene  | 66954;30514   |
| 1848 | chr7  | 45887436  | + | chr7  | 100908661 | - | Y | Y | Y | Y | Y | invers_f | na | NA | intergenic | RNU6-326P,AC096582      | +, | snRNA,prot   | 4097;15248    | intergenic | FIS1,RNU6-1104P          | -, | protein_cod | 13064;4558    |
| 1849 | chr7  | 47653664  | + | chr7  | 47654992  | - | N | N | N | Y | N | invers_f | na | NA | intergenic | TNS3,AC095067.1         | +, | protein_cod  | 31508;7873    | intergenic | TNS3,AC095067.1          | -, | protein_cod | 32836;6545    |
| 1850 | chr7  | 57555150  | + | chr7  | 6454550   | - | N | N | N | Y | N | invers_f | na | NA | intergenic | RP11-1324A7.2.NCOR      | +, | pseudogene   | 9549;104350   | intergenic | RP11-667F9.2,RP11-328    | -, | lincRNA,ps  | 26199;19136   |
| 1851 | chr7  | 67635773  | + | chr7  | 98083201  | - | Y | Y | Y | Y | N | invers_f | na | NA | ncRNA_intr | RP5-945F2.3             | +, | lincRNA      | 0             | downstream | AC091654.7               | -, | pseudogene  | 0             |
| 1852 | chr7  | 70420968  | + | chr7  | 70438886  | - | Y | Y | Y | Y | Y | invers_f | na | NA | intergenic | RP11-575M4.1,WBSCI      | +, | pseudogene   | 117969;176187 | intergenic | RP11-575M4.1,WBSCR1      | +, | pseudogene  | 135887;158269 |
| 1853 | chr7  | 91110975  | + | chr7  | 91137129  | - | N | N | N | Y | N | invers_f | na | NA | ncRNA_intr | RP11-142A5.1,RP11-1     | +, | lincRNA,inc  | 0             | ncRNA_intr | RP11-142A5.1,RP11-115    | -, | lincRNA,inc | 0             |
| 1854 | chr7  | 91111002  | + | chr7  | 91137139  | - | N | N | N | N | Y | invers_f | na | NA | ncRNA_intr | RP11-142A5.1,RP11-1     | +, | lincRNA,inc  | 0             | ncRNA_intr | RP11-142A5.1,RP11-115    | -, | lincRNA,inc | 0             |
| 1855 | chr7  | 124663200 | + | chr7  | 147571358 | - | N | N | N | N | N | invers_f | na | NA | antisense  | ncRNA_intrPOT1-AS1      | +  | protein_cod  | 0             | intronic   | CNTNAP2                  | +  | protein_cod | 0             |
| 1856 | chr7  | 134506345 | + | chr7  | 134520900 | - | N | Y | Y | Y | N | invers_f | na | NA | intronic   | CALD1                   | +  | protein_cod  | 0             | intronic   | CALD1                    | +  | protein_cod | 0             |
| 1857 | chr7  | 142031078 | + | chr7  | 142247826 | - | N | N | N | N | Y | invers_f | na | NA | upstream   | TRBV7-1                 | +  | TR_V_gene    | 0             | upstream   | TRBV7-3                  | +  | TR_V_gene   | 0             |
| 1858 | chr7  | 142034597 | + | chr7  | 142261797 | - | Y | Y | Y | Y | Y | invers_f | na | NA | intergenic | TRBV7-1,TRBV4-2         | +, | TR_V_gene    | 2070;10655    | intergenic | TRBV8-1,TRBV19           | -, | TR_V_pseu   | 2863;50166    |
| 1859 | chr7  | 142048164 | + | chr7  | 142251708 | - | N | N | N | N | Y | invers_f | na | NA | intergenic | TRBV4-2,TRBV7-8         | +, | TR_V_gene    | 2348;51291    | upstream   | TRBV6-4                  | +  | TR_V_gene   | 0             |
| 1860 | chr7  | 149736275 | + | chr7  | 153757820 | - | N | N | N | N | Y | invers_f | na | NA | intergenic | RP11-728K20.2,RP11-     | +, | lincRNA,inc  | 34062;1335    | intronic   | DPP6                     | +  | protein_cod | 0             |
| 1861 | chr7  | 156387082 | + | chr7  | 156394320 | - | Y | N | Y | Y | Y | invers_f | na | NA | ncRNA_intr | LINC01006               | -  | processed_   | 0             | ncRNA_intr | LINC01006                | -  | processed_  | 0             |
| 1862 | chr8  | 25911942  | + | chr8  | 25913025  | - | N | N | N | N | Y | invers_f | na | NA | intergenic | EBF2,RNA5SP258          | -, | protein_cod  | 9029;82454    | intergenic | EBF2,RNA5SP258           | -, | protein_cod | 10112;81371   |
| 1863 | chr8  | 25912025  | + | chr8  | 25912580  | - | N | N | Y | N | N | invers_f | na | NA | intergenic | EBF2,RNA5SP258          | -, | protein_cod  | 9112;82371    | intergenic | ir EBF2,RNA5SP258        | +, | protein_cod | 9667;81816    |
| 1864 | chr8  | 26969096  | + | chr8  | 26969818  | - | N | N | N | N | Y | invers_f | na | NA | intergenic | RP11-521M14.2,AC091     | +, | protein_cod  | 24330;36125   | intergenic | RP11-521M14.2,AC0901     | +, | protein_cod | 24452;36003   |
| 1865 | chr8  | 68667474  | + | chr8  | 71768187  | - | N | N | N | N | Y | invers_f | na | NA | intergenic | CPA6,NDUFS5P6           | +, | protein_cod  | 8854;93805    | intergenic | Y_RNA,RP11-326E22.1      | +, | misc_RNA,i  | 74944;299505  |
| 1866 | chr8  | 68667603  | + | chr8  | 71768023  | - | N | N | N | N | Y | invers_f | na | NA | intergenic | CPA6,NDUFS5P6           | +, | protein_cod  | 8983;93676    | intergenic | Y_RNA,RP11-326E22.1      | +, | misc_RNA,i  | 74780;299669  |
| 1867 | chr9  | 2279611   | + | chr9  | 3812868   | - | N | Y | N | N | N | invers_f | na | NA | intergenic | RN7SL592P,RP11-125      | -, | misc_RNA,i   | 50370;143091  | intergenic | RP11-509J2J.3,GLIS3      | +, | lincRNA,prc | 121054;11259  |
| 1868 | chr9  | 66462153  | + | chr9  | 66474386  | - | N | N | N | N | Y | invers_f | na | NA | ncRNA_exo  | RP11-262H14.1           | +  | lincRNA      | 0             | downstream | AL512625.1               | +  | pseudogene  | 0             |
| 1869 | chr9  | 66491185  | + | chr9  | 68377525  | - | N | N | N | N | Y | invers_f | na | NA | intergenic | AL512625.1,RP11-262     | +, | pseudogene   | 17512;2387    | intergenic | PTGER4P3,RP11-764K9      | +  | pseudogene  | 5648;20353    |
| 1870 | chr9  | 68421834  | + | chr9  | 68429244  | - | N | Y | Y | Y | Y | invers_f | na | NA | intergenic | MIR4477A,RP11-764K      | +, | miRNA,pse    | 6446;6027     | ncRNA_intr | RP11-764K9.4             | +, | snRNA       | 0             |
| 1871 | chrX  | 27031046  | + | chrX  | 27031893  | - | N | N | Y | Y | N | invers_f | na | NA | intergenic | RNU1-142P,RP11-268      | +, | snRNA,lincf  | 222643;29978  | intergenic | RNU1-142P,RP11-268G1     | +, | snRNA,lincf | 223490;29131  |
| 1872 | chrX  | 51280359  | + | chrX  | 51965838  | - | Y | N | N | N | N | invers_f | na | NA | intergenic | RP11-56H2.2,CENPVF      | -, | lincRNA,ps   | 26502;80602   | intergenic | RP11-363G10.2,XAGE2E     | +, | protein_cod | 19480;146335  |
| 1873 | chrX  | 69934767  | + | chrX  | 69950083  | - | N | N | N | Y | N | invers_f | na | NA | intronic   | TEX11                   | +  | protein_cod  | 0             | intronic   | TEX11                    | +  | protein_cod | 0             |
| 1874 | chrX  | 69935312  | + | chrX  | 69499500  | - | N | N | N | N | Y | invers_f | na | NA | intronic   | TEX11                   | +  | protein_cod  | 0             | intronic   | TEX11                    | +  | protein_cod | 0             |
| 1875 | chrX  | 76653692  | + | chrX  | 140499290 | - | Y | Y | N | Y | Y | invers_f | na | NA | intergenic | BX682235.1,FGF16        | +, | pseudogene   | 51910;55956   | intergenic | GS1-164F24.1,SPANXA2     | +, | pseudogene  | 24019;91553   |
| 1876 | chr1  | 16408763  | - | chr1  | 16407686  | + | Y | N | Y | Y | Y | invers_r | na | NA | intergenic | FAM131C,EPHA2           | -  | protein_cod  | 8642;42069    | intergenic | FAM131C,EPHA2            | -  | protein_cod | 7565;43146    |
| 1877 | chr1  | 17027884  | - | chr1  | 6507221   | - | N | N | N | N | Y | invers_r | na | NA | ncRNA_intr | ESPNP                   | -  | pseudogene   | 0             | intronic   | ESPN                     | +  | protein_cod | 0             |
| 1878 | chr1  | 17236159  | - | chr1  | 16830442  | + | N | N | N | N | Y | invers_r | na | NA | intergenic | RP11-108M9.6,CROCI      | +, | lincRNA,pro  | 4888;12286    | intergenic | CROCCP3,RNU1-1           | -, | pseudogene  | 4690;10175    |
| 1879 | chr1  | 30878819  | - | chr1  | 29270344  | + | N | N | N | N | Y | invers_r | na | NA | intergenic | ir RP3-357116.1,RP4-59' | +, | pseudogene   | 179357;3588   | intergenic | RP3-437116.1,AL139151    | +, | lincRNA,mif | 43718;38649   |
| 1880 | chr1  | 30878819  | - | chr1  | 30878513  | + | Y | Y | N | Y | Y | invers_r | na | NA | intergenic | ir RP3-357116.1,RP4-59' | +, | pseudogene   | 179357;3588   | intergenic | RP3-357116.1,RP4-591L    | +, | pseudogene  | 179051;3894   |
| 1881 | chr1  | 30879252  | - | chr1  | 29270380  | + | N | Y | N | Y | Y | invers_r | na | NA | intergenic | RP3-357116.1,RP4-59'    | +, | pseudogene   | 179790;3155   | intergenic | RP3-437116.1,AL139151    | +, | lincRNA,mif | 43754;38613   |
| 1882 | chr1  | 81661371  | - | chr1  | 81660357  | + | N | N | Y | N | N | invers_r | na | NA | intergenic | ir RPL7P10,RP3-445O10.1 | +, | pseudogene   | 96681;12882   | intergenic | ir RPL7P10,RP3-445O10.1  | -, | pseudogene  | 95667;13896   |
| 1883 | chr1  | 147775456 | - | chr1  | 147752758 | + | Y | Y | Y | Y | Y | invers_r | na | NA | intergenic | RP11-495P10.5,RP11-     | +, | lincRNA,ps   | 5793;14343    | ncRNA_intr | RP11-495P10.6            | +  | lincRNA     | 0             |
| 1884 | chr1  | 149215463 | - | chr1  | 17231355  | + | Y | N | Y | N | N | invers_r | na | NA | upstream   | RNU1-92P                | -  | snRNA        | 0             | upstream   | RP11-108M9.6             | -  | lincRNA     | 0             |
| 1885 | chr1  | 149215898 | - | chr1  | 17231095  | + | N | Y | N | N | N | invers_r | na | NA | upstream   | RNU1-92P                | -  | snRNA        | 0             | ncRNA_exo  | RP11-108M9.6             | -  | lincRNA     | 0             |
| 1886 | chr1  | 149217436 | - | chr1  | 17228765  | + | N | N | N | N | Y | invers_r | na | NA | intergenic | RNU1-92P,RNVU1-18       | -, | snRNA,snR    | 2136;6622     | intergenic | ir RNU1-2,RP11-108M9.6   | +, | snRNA,lincf | 6127;2069     |
| 1887 | chr1  | 149217463 | - | chr1  | 17228789  | + | N | N | Y | N | Y | invers_r | na | NA | intergenic | RNU1-92P,RNVU1-18       | -, | snRNA,snR    | 2183;6575     | intergenic | RNU1-2,RP11-108M9.6      | +, | snRNA,lincf | 6151;2045     |
| 1888 | chr1  | 149217533 | - | chr1  | 17228765  | + | Y | N | N | N | N | invers_r | na | NA | intergenic | RNU1-92P,RNVU1-18       | -, | snRNA,snR    | 2233;6525     | intergenic | ir RNU1-2,RP11-108M9.6   | +, | snRNA,lincf | 6127;2069     |
| 1889 | chr1  | 149220851 | - | chr1  | 17225522  | + | Y | Y | N | Y | Y | invers_r | na | NA | intergenic | RNU1-92P,RNVU1-18       | -, | snRNA,snR    | 5551;3207     | intergenic | RNU1-2,RP11-108M9.6      | +, | snRNA,lincf | 2884;5312     |
| 1890 | chr1  | 165552835 | - | chr1  | 165552432 | + | N | N | Y | N | N | invers_r | na | NA | intergenic | RP11-306I1.1,RP11-3C    | +, | pseudogene   | 1122;14865    | downstream | RP11-306I1.1             | +  | pseudogene  | 0             |
| 1891 | chr1  | 167175201 | - | chr1  | 113206277 | + | N | N | N | N | Y | invers_r | na | NA | intergenic | RP11-277B15.2,RP11-     | +, | antisense,ai | 10172;13867   | intronic   | CAPZA1                   | +  | protein_cod | 0             |
| 1892 | chr1  | 170251339 | - | chr1  | 166676095 | + | N | N | N | N | Y | invers_r | na | NA | ncRNA_intr | LINC01142               | -  | lincRNA      | 0             | intergenic | FMO10P,RL4P2             | +, | pseudogene  | 24662;40521   |
| 1893 | chr1  | 181044092 | - | chr1  | 181043901 | + | N | N | N | Y | N | invers_r | na | NA | intergenic | ir MR1,IER5             | +, | protein_cod  | 13018;13546   | intergenic | ir MR1,IER5              | +, | protein_cod | 12827;13737   |
| 1894 | chr1  | 181044529 | - | chr1  | 181044089 | + | Y | N | N | N | Y | invers_r | na | NA | intergenic | MR1,IER5                | +, | protein_cod  | 13455;13109   | intergenic | MR1,IER5                 | +, | protein_cod | 13015;13549   |
| 1895 | chr1  | 181044540 | - | chr1  | 181044161 | + | N | N | N | N | Y | invers_r | na | NA | intergenic | MR1,IER5                | +, | protein_cod  | 13466;13098   | intergenic | MR1,IER5                 | +, | protein_cod | 13087;13477   |
| 1896 | chr1  | 187466731 | - | chr1  | 187466474 | + | N | N | N | N | Y | invers_r | na | NA | intergenic | ir RP11-445P19.3,RP11-  | +, | lincRNA,ps   | 16985;9239    | intergenic | ir RP11-445P19.3,RP11-44 | +, | lincRNA,ps  | 16728;9496    |
| 1897 | chr1  | 207293196 | - | chr1  | 207292347 | + | Y | Y | Y | Y | Y | invers_r | na | NA | intronic   | C4BPA                   | +  | protein_cod  | 0             | intronic   | C4BPA                    | +  | protein_cod | 0             |
| 1898 | chr1  | 234912188 | - | chr1  | 17051740  | + | N | N | Y | N | Y | invers_r | na | NA | intergenic | LINC01132,RNY4P16       | +, | lincRNA,ms   | 44798;61532   | intergenic | ESPNP,FAM231C            | -, | pseudogene  | 5088;8707     |
| 1899 | chr1  | 237566206 | - | chr1  | 237566102 | + | Y | Y | Y | Y | Y | invers_r | na | NA | intronic   | RYR2                    | +  | protein_cod  | 0             | intronic   | RYR2                     | +  | protein_cod | 0             |
| 1900 | chr10 | 13105272  | - | chr10 | 13105037  | + | Y | N | N | Y | Y | invers_r | na | NA | intronic   | CCDC3                   | -  | protein_cod  | 0             | intronic   | CCDC3                    | -  | protein_cod | 0             |
| 1901 | chr10 | 13105278  | - | chr10 | 13104977  | + | N | N | N | N | N | invers_r | na | NA | intronic   | CCDC3                   | -  | protein_cod  | 0             | intronic   | CCDC3                    | -  | protein_cod | 0             |
| 1902 | chr10 | 36301836  | - | chr10 | 36148115  | + | Y | N | N | N | Y |          |    |    |            |                         |    |              |               |            |                          |    |             |               |

|      |       |           |   |       |           |   |   |   |   |   |   |   |          |    |    |               |                      |        |             |               |               |                       |    |             |               |
|------|-------|-----------|---|-------|-----------|---|---|---|---|---|---|---|----------|----|----|---------------|----------------------|--------|-------------|---------------|---------------|-----------------------|----|-------------|---------------|
| 1927 | chr12 | 50183077  | - | chr12 | 50182563  | + | N | Y | N | N | N | N | invers_r | na | NA | intergenic    | LSM6P2,NCKAP5L       | +-     | pseudogene  | 18158;1852    | intergenic    | LSM6P2,NCKAP5L        | +- | pseudogene  | 17644;2366    |
| 1928 | chr12 | 66554626  | - | chr12 | 50858997  | + | N | N | N | Y | N | N | invers_r | na | NA | intronic      | TMBIM4,TMBIM4        | -      | protein_cod | 0             | intergenic    | B4GALNT1,snoU13       | -  | protein_cod | 31859;3730    |
| 1929 | chr12 | 125801148 | - | chr12 | 258956127 | + | N | N | Y | Y | Y | Y | invers_r | na | NA | intergenic;nc | NONE,TMEM132B        | NONE,+ | ncRNA,prote | NONE;10014    | ncRNA_intron  | RP11-443N24.2         | +  | lincRNA     | 0             |
| 1930 | chr12 | 125801148 | - | chr12 | 104359630 | + | Y | N | N | N | N | N | invers_r | na | NA | intergenic;nc | NONE,TMEM132B        | NONE,+ | ncRNA,prote | NONE;10014    | UTR5          | TDG                   | +  | protein_cod | 0             |
| 1931 | chr13 | 25564594  | - | chr13 | 21789417  | + | N | N | N | Y | N | N | invers_r | na | NA | intergenic    | RPL34P27,LSP1        | +-     | pseudogene  | 1531;26947    | intergenic    | MRP63,RP11-101P17.14  | +  | protein_cod | 36194;1277    |
| 1932 | chr13 | 47039539  | - | chr13 | 45952099  | + | N | N | Y | N | N | N | invers_r | na | NA | ncRNA_intron  | RP11-189B4.6         | -      | lincRNA     | 0             | ncRNA_intron  | TPT1-AS1              | +  | antisense   | 0             |
| 1933 | chr13 | 86917308  | - | chr13 | 86914888  | + | Y | Y | N | Y | Y | Y | invers_r | na | NA | intergenic    | RP11-30L8.1,DDX6P2   | ++     | lincRNA,ps  | 172283;10447  | intergenic    | RP11-30L8.1,DDX6P2    | ++ | lincRNA,ps  | 169863;12867  |
| 1934 | chr13 | 8740282   | - | chr13 | 87015014  | + | N | N | N | N | N | Y | invers_r | na | NA | intergenic    | LINC00430,UBBP5      | ++     | lincRNA,ps  | 251011;30977  | intergenic    | DDX6P2,TXNL1P1        | ++ | pseudogene  | 85490;362741  |
| 1935 | chr13 | 89112881  | - | chr13 | 89110970  | + | Y | N | N | N | N | Y | invers_r | na | NA | intergenic;nc | RPL29P29,LINC00433   | +-     | pseudogene  | 223657;80238  | intergenic;nc | RPL29P29,LINC00433    | +- | pseudogene  | 221746;82149  |
| 1936 | chr14 | 58412160  | - | chr14 | 58259279  | + | Y | Y | Y | Y | Y | Y | invers_r | na | NA | intergenic    | SLC35F4,RP11-999E2   | -      | protein_cod | 79380;48103   | intronic      | SLC35F4               | -  | protein_cod | 0             |
| 1937 | chr14 | 60941377  | - | chr14 | 60913734  | + | N | N | N | N | N | Y | invers_r | na | NA | intronic      | C14orf39             | +      | protein_cod | 0             | intronic      | C14orf39              | -  | protein_cod | 0             |
| 1938 | chr14 | 63226284  | - | chr14 | 47117868  | + | Y | N | Y | Y | N | N | invers_r | na | NA | intronic      | KCNH5                | +      | protein_cod | 0             | intergenic    | LINC00871,RPL10L      | +- | lincRNA,prc | 146842;2354   |
| 1939 | chr14 | 93926722  | - | chr14 | 93926105  | + | N | N | Y | N | N | N | invers_r | na | NA | intronic      | UNC79                | +      | protein_cod | 0             | intronic      | UNC79                 | -  | protein_cod | 0             |
| 1940 | chr14 | 97971695  | - | chr14 | 24098400  | + | N | N | Y | Y | N | Y | invers_r | na | NA | ncRNA_intron  | CTD-2506J14.1        | +      | lincRNA     | 0             | upstream      | DHRS2                 | +  | protein_cod | 0             |
| 1941 | chr15 | 31956457  | - | chr15 | 31033637  | + | N | Y | Y | Y | N | N | invers_r | na | NA | intronic      | OTUD7A               | +      | protein_cod | 0             | intergenic    | ARHGAP11B,GOLGA8U     | +  | protein_cod | 55827;50139   |
| 1942 | chr15 | 97899864  | - | chr15 | 97899741  | + | N | N | N | Y | N | N | invers_r | na | NA | ncRNA_intron  | CTD-2147F2.1         | +      | lincRNA     | 0             | ncRNA_intron  | CTD-2147F2.1          | +  | lincRNA     | 0             |
| 1943 | chr16 | 48651331  | - | chr16 | 48650866  | + | N | Y | Y | N | N | N | invers_r | na | NA | intergenic    | N4BP1,CTC-527H23.2   | +-     | protein_cod | 7211;2899     | intergenic    | N4BP1,CTC-527H23.2    | +- | protein_cod | 6746;3364     |
| 1944 | chr16 | 80277320  | - | chr16 | 24120359  | + | N | N | N | N | Y | N | invers_r | na | NA | ncRNA_intron  | RP11-525K10.3        | -      | antisense   | 0             | intronic      | PRKCB                 | +  | protein_cod | 0             |
| 1945 | chr16 | 85189800  | - | chr16 | 85188713  | + | Y | Y | Y | N | Y | Y | invers_r | na | NA | intergenic    | FAM92B,CTC-786C10    | +-     | protein_cod | 43686;15082   | intergenic    | FAM92B,CTC-786C10.1   | +  | protein_cod | 42599;16169   |
| 1946 | chr17 | 21828533  | - | chr17 | 21303090  | + | Y | N | N | N | N | N | invers_r | na | NA | upstream      | RP11-1109M24.13      | -      | pseudogene  | 0             | intronic      | KCNJ12                | -  | protein_cod | 0             |
| 1947 | chr17 | 41401056  | - | chr17 | 41379303  | + | Y | Y | Y | Y | Y | Y | invers_r | na | NA | intergenic    | LINC00854,LINC00910  | -      | processed_  | 17718;46157   | ncRNA_intron  | LINC00854             | -  | processed_  | 0             |
| 1948 | chr17 | 41463344  | - | chr17 | 41381590  | + | Y | Y | Y | Y | Y | Y | invers_r | na | NA | ncRNA_exon    | LINC00910            | -      | lincRNA     | 0             | ncRNA_intron  | LINC00854             | -  | processed_  | 0             |
| 1949 | chr17 | 74606806  | - | chr17 | 73249716  | + | N | N | N | N | N | Y | invers_r | na | NA | intergenic    | RP11-666A8.11,ST6G   | -      | pseudogene  | 14952;14037   | intronic      | GGA3                  | -  | protein_cod | 0             |
| 1950 | chr17 | 74607007  | - | chr17 | 73249567  | + | N | Y | N | N | N | N | invers_r | na | NA | intergenic    | RP11-666A8.11,ST6G   | -      | pseudogene  | 15153;13836   | intronic      | GGA3                  | -  | protein_cod | 0             |
| 1951 | chr18 | 14172168  | - | chr18 | 12089182  | + | N | Y | N | N | N | N | invers_r | na | NA | intergenic    | NF1P5,ANKRD20A5P     | +-     | pseudogene  | 14827;6928    | intergenic    | RP11-815J4.1,RP11-815 | +- | lincRNA,ps  | 3916;2491     |
| 1952 | chr18 | 22922754  | - | chr18 | 22446131  | + | Y | N | N | N | N | N | invers_r | na | NA | intronic      | ZNF521               | -      | protein_cod | 0             | ncRNA_intron  | RP11-449D8.5          | +  | lincRNA     | 0             |
| 1953 | chr18 | 16014991  | - | chr19 | 15822763  | + | N | Y | Y | N | N | N | invers_r | na | NA | upstream      | AC005336.5           | -      | pseudogene  | 0             | intergenic    | CYP4F12,OR10H2        | ++ | protein_cod | 14779;16071   |
| 1954 | chr19 | 34739822  | - | chr19 | 34737017  | + | Y | N | N | N | N | N | invers_r | na | NA | intergenic    | LSM14A,KIAA0355      | ++     | protein_cod | 19402;5620    | intergenic    | LSM14A,KIAA0355       | ++ | protein_cod | 16597;8425    |
| 1955 | chr19 | 44963092  | - | chr19 | 44914099  | + | N | Y | Y | N | N | N | invers_r | na | NA | intergenic    | ZNF229,ZNF285B       | +-     | protein_cod | 10326;8766    | ncRNA_intron  | CTC-512J12.4          | -  | processed_  | 0             |
| 1956 | chr19 | 44963108  | - | chr19 | 44914140  | + | N | N | N | Y | N | N | invers_r | na | NA | intergenic    | ZNF229,ZNF285B       | +-     | protein_cod | 10342;8750    | ncRNA_intron  | CTC-512J12.4          | -  | processed_  | 0             |
| 1957 | chr2  | 16407765  | - | chr2  | 16406393  | + | Y | Y | Y | Y | Y | Y | invers_r | na | NA | ncRNA_intron  | AC010745.2           | +      | lincRNA     | 0             | ncRNA_intron  | AC010745.2            | +  | lincRNA     | 0             |
| 1958 | chr2  | 61703127  | - | chr2  | 61700745  | + | N | N | N | N | N | Y | invers_r | na | NA | ncRNA_intron  | RP11-355B11.2        | +      | antisense   | 0             | ncRNA_intron  | RP11-355B11.2         | +  | antisense   | 0             |
| 1959 | chr2  | 116981881 | - | chr2  | 116974339 | + | Y | Y | N | Y | Y | Y | invers_r | na | NA | intergenic    | DPP10,RP11-338I24.1  | +-     | protein_cod | 378553;462913 | intergenic    | DPP10,RP11-338I24.1   | +- | protein_cod | 371011;470455 |
| 1960 | chr2  | 131887201 | - | chr2  | 131886791 | + | N | N | Y | N | N | N | invers_r | na | NA | intronic      | PLEKH2               | +      | protein_cod | 0             | intronic      | PLEKH2                | +  | protein_cod | 0             |
| 1961 | chr2  | 131887269 | - | chr2  | 131886619 | + | N | N | N | Y | N | N | invers_r | na | NA | intronic      | PLEKH2               | +      | protein_cod | 0             | intronic      | PLEKH2                | +  | protein_cod | 0             |
| 1962 | chr2  | 131887307 | - | chr2  | 131886577 | + | Y | N | N | N | Y | Y | invers_r | na | NA | intronic      | PLEKH2               | +      | protein_cod | 0             | intronic      | PLEKH2                | +  | protein_cod | 0             |
| 1963 | chr2  | 153461446 | - | chr2  | 153461095 | + | N | N | N | N | N | Y | invers_r | na | NA | intronic      | FMNL2                | +      | protein_cod | 0             | intronic      | FMNL2                 | +  | protein_cod | 0             |
| 1964 | chr2  | 216474151 | - | chr2  | 216473154 | + | Y | N | N | N | N | N | invers_r | na | NA | ncRNA_intron  | AC012668.2           | +      | lincRNA     | 0             | ncRNA_intron  | AC012668.2            | +  | lincRNA     | 0             |
| 1965 | chr2  | 228075904 | - | chr2  | 228075156 | + | N | N | N | N | Y | N | invers_r | na | NA | intronic;intr | COL4A3               | +      | protein_cod | 0             | intronic      | COL4A3                | +  | protein_cod | 0             |
| 1966 | chr2  | 228075904 | - | chr2  | 228075159 | + | N | Y | N | N | N | N | invers_r | na | NA | intronic;intr | COL4A3               | +      | protein_cod | 0             | intronic      | COL4A3                | +  | protein_cod | 0             |
| 1967 | chr20 | 18595822  | - | chr20 | 18591558  | + | N | N | N | Y | N | N | invers_r | na | NA | intronic;intr | DTD1                 | +      | protein_cod | 0             | intronic;intr | DTD1                  | +  | protein_cod | 0             |
| 1968 | chr21 | 41405547  | - | chr21 | 41400421  | + | N | N | N | N | N | Y | invers_r | na | NA | intronic      | DSCAM                | -      | protein_cod | 0             | intronic      | DSCAM                 | -  | protein_cod | 0             |
| 1969 | chr21 | 41406898  | - | chr21 | 41398962  | + | N | N | Y | N | N | N | invers_r | na | NA | intronic      | DSCAM                | -      | protein_cod | 0             | intronic      | DSCAM                 | -  | protein_cod | 0             |
| 1970 | chr21 | 41407177  | - | chr21 | 41398726  | + | N | Y | N | N | N | N | invers_r | na | NA | intronic      | DSCAM                | -      | protein_cod | 0             | intronic      | DSCAM                 | -  | protein_cod | 0             |
| 1971 | chr22 | 29065782  | - | chr22 | 29065291  | + | Y | N | N | Y | N | N | invers_r | na | NA | intronic      | TTC28                | -      | protein_cod | 0             | intronic      | TTC28                 | -  | protein_cod | 0             |
| 1972 | chr22 | 38506347  | - | chr22 | 37724999  | + | N | N | N | N | Y | N | invers_r | na | NA | intronic      | BAIP2L2              | -      | protein_cod | 0             | intergenic    | CYTH4,RP1-63G5.5      | +- | protein_cod | 13617;10625   |
| 1973 | chr3  | 22782477  | - | chr3  | 22751299  | + | Y | N | N | N | N | N | invers_r | na | NA | intergenic    | AC092421.1,RP11-103T | -      | pseudogene  | 70275;70404   | intergenic    | AC092421.1,RP11-103T  | -  | pseudogene  | 39097;101582  |
| 1974 | chr3  | 82204007  | - | chr3  | 82203550  | + | N | N | N | Y | N | N | invers_r | na | NA | ncRNA_intron  | RP11-260O18.1        | +      | lincRNA     | 0             | ncRNA_intron  | RP11-260O18.1         | +  | lincRNA     | 0             |
| 1975 | chr3  | 131713384 | - | chr3  | 131708358 | + | N | Y | N | N | N | N | invers_r | na | NA | intronic      | CPNE4                | +      | protein_cod | 0             | intronic      | CPNE4                 | +  | protein_cod | 0             |
| 1976 | chr4  | 3627529   | - | chr4  | 3598722   | + | Y | Y | Y | Y | Y | Y | invers_r | na | NA | intergenic    | LINC00955,RP3-368B   | ++     | protein_cod | 35798;7227    | intergenic    | LINC00955,RP3-368B    | ++ | protein_cod | 6991;36034    |
| 1977 | chr4  | 4004836   | - | chr4  | 3932025   | + | N | N | Y | Y | N | N | invers_r | na | NA | intergenic    | ENPP7P9,AC116562.2   | +-     | pseudogene  | 35449;33975   | ncRNA_intron  | AC226119.5            | +  | processed_  | 0             |
| 1978 | chr4  | 4005095   | - | chr4  | 39311580  | + | Y | N | N | N | N | N | invers_r | na | NA | intergenic    | ENPP7P9,AC116562.2   | +-     | pseudogene  | 35708;33716   | ncRNA_intron  | AC226119.5            | +  | processed_  | 0             |
| 1979 | chr4  | 9641431   | - | chr4  | 4007090   | + | Y | N | N | N | N | N | invers_r | na | NA | intergenic    | AC097493.1,ENPP7P1   | +-     | miRNA,ps    | 39380;37501   | intergenic    | ENPP7P9,AC116562.2    | +- | pseudogene  | 37703;31721   |
| 1980 | chr4  | 79035960  | - | chr4  | 78178993  | + | N | N | N | N | Y | N | invers_r | na | NA | intronic      | FRAS1                | +      | protein_cod | 0             | intergenic    | CTB-179I1.3,CTB-179I1 | -  | pseudogene  | 40962;53557   |
| 1981 | chr4  | 88858700  | - | chr4  | 88847164  | + | Y | Y | Y | Y | Y | Y | invers_r | na | NA | intergenic    | HSP90AB3P,SPP1       | ++     | pseudogene  | 43533;38119   | intergenic    | HSP90AB3P,SPP1        | ++ | pseudogene  | 31997;49655   |
| 1982 | chr4  | 91936102  | - | chr4  | 91933591  | + | N | N | Y | Y | N | Y | invers_r | na | NA | intronic      | CCSER1               | +      | protein_cod | 0             | intronic      | CCSER1                | +  | protein_cod | 0             |
| 1983 | chr5  | 8996701   | - | chr5  | 7262631   | + | N | N | N | Y | N | N | invers_r | na | NA | intergenic    | RP11-143A12.3,CTD-2  | ++     | lincRNA,ant | 117064;3185   | intergenic    | RP11-122F24.1,RP11-40 | +  | lincRNA,ps  | 71706;25406   |
| 1984 | chr5  | 178183075 | - | chr5  | 170280554 | + | N | N | N | N | Y | N | invers_r | na | NA | intergenic    | ZNF354A,AACSP1       | -      | protein_cod | 25372;8787    | intergenic    | GABRP,RANBP17         | ++ | protein_cod | 19503;28320   |
| 1985 | chr5  | 178183082 | - | chr5  | 170280575 | + | Y | Y | Y | N | N | N | invers_r | na | NA | intergenic    | ZNF354A,AACSP1       | -      | protein_cod | 25379;8780    | intergenic    | GABRP,RANBP17         | ++ | protein_cod | 19524;28299   |
| 1986 | chr5  | 180100887 | - | chr5  | 178266107 | + | N | N | N | N | N | Y | invers_r | na | NA | intergenic    | RP11-451H23.2,RP11-  | +-     | pseudogene  | 1289;10879    | upstream      | RP11-214.2            | +  | pseudogene  | 0             |

|      |       |           |   |       |           |   |   |   |   |   |   |            |    |      |               |                      |          |                    |               |               |                        |          |              |              |
|------|-------|-----------|---|-------|-----------|---|---|---|---|---|---|------------|----|------|---------------|----------------------|----------|--------------------|---------------|---------------|------------------------|----------|--------------|--------------|
| 2011 | chr7  | 154943264 | - | chr7  | 151768311 | + | Y | Y | Y | Y | N | invers_r   | na | NA   | intergenic    | AC092628.3,RN7SKP1   | +,+      | pseudogene         | 44903;30327   | intronic      | GALNT11                | +        | protein_cod  | 0            |
| 2012 | chr7  | 154943307 | - | chr7  | 151768268 | + | N | N | N | N | Y | invers_r   | na | NA   | intergenic    | AC092628.3,RN7SKP1   | +,+      | pseudogene         | 44946;30284   | intronic      | GALNT11                | -        | protein_cod  | 0            |
| 2013 | chr7  | 158956388 | - | chr7  | 158925728 | + | N | N | N | Y | Y | invers_r   | na | NA   | intergenic    | VIPR2,PIP5K1P2       | -,+      | protein_cod        | 18739;67737   | intronic      | VIPR2                  | +        | protein_cod  | 0            |
| 2014 | chr8  | 36161662  | - | chr8  | 36160827  | + | Y | N | N | N | N | invers_r   | na | NA   | intergenic    | RP11-593P24.3,RP11-  | -,+      | pseudogene         | 24448;4101    | intergenic    | RP11-593P24.3,RP11-13  | -,+      | pseudogene   | 23613;4936   |
| 2015 | chr8  | 71768003  | - | chr8  | 68667664  | + | Y | N | N | N | N | invers_r   | na | NA   | intergenic    | Y_RNA,RP11-326E22.   | -,+      | misc_RNA,antisense | 74760;299689  | intergenic    | CPA6,NDUFS5P6          | -,+      | protein_cod  | 9044;93615   |
| 2016 | chr8  | 144926458 | - | chr8  | 143791732 | + | N | N | N | N | Y | invers_r   | na | NA   | downstream    | AC105049.1           | +        | miRNA              | 0             | ncRNA_intr    | CTD-2292P10.4          | -        | antisense    | 0            |
| 2017 | chr8  | 144926483 | - | chr8  | 143791675 | + | Y | N | N | N | N | invers_r   | na | NA   | downstream    | AC105049.1           | +        | miRNA              | 0             | ncRNA_intr    | CTD-2292P10.4          | -        | antisense    | 0            |
| 2018 | chr9  | 66478619  | - | chr9  | 66469907  | + | Y | N | N | N | N | invers_r   | na | NA   | intergenic    | AL512625.1,RP11-262  | -,+      | pseudogene         | 4946;14953    | downstream    | RP11-262H14.1          | +        | lincRNA      | 0            |
| 2019 | chr9  | 68414094  | - | chr9  | 66455691  | + | Y | Y | Y | Y | Y | invers_r   | na | NA   | ncRNA_exo     | LINC00537            | -        | pseudogene         | 0             | intergenic    | RP11-459016.7,RP11-2E  | +,+      | pseudogene   | 58578;1594   |
| 2020 | chr9  | 95646217  | - | chr9  | 90748590  | + | N | Y | N | Y | N | invers_r   | na | NA   | ncRNA_exo     | ANKRD19P,RP11-526I   | +,+      | pseudogene         | 0             | ncRNA_intr    | SPATA31C2              | -        | pseudogene   | 0            |
| 2021 | chr9  | 95646224  | - | chr9  | 90748565  | + | N | N | Y | N | Y | invers_r   | na | NA   | ncRNA_exo     | ANKRD19P,RP11-526I   | +,+      | pseudogene         | 0             | ncRNA_exo     | SPATA31C2              | -        | pseudogene   | 0            |
| 2022 | chrX  | 27032048  | - | chrX  | 27031233  | + | N | N | N | N | Y | invers_r   | na | NA   | intergenic    | RNU1-142P,RP11-268I  | -,+      | snRNA,lincf        | 223645;28976  | intergenic    | RNU1-142P,RP11-268G1   | -,+      | snRNA,lincf  | 222830;29791 |
| 2023 | chrX  | 29270196  | - | chrX  | 29269148  | + | Y | Y | Y | Y | Y | invers_r   | na | NA   | intronic      | IL1RAPL1             | +        | protein_cod        | 0             | intronic      | IL1RAPL1               | +        | protein_cod  | 0            |
| 2024 | chrX  | 51965509  | - | chrX  | 51279977  | + | N | N | N | Y | N | invers_r   | na | NA   | intergenic    | RP11-363G10.2,XAGE   | +,+      | protein_cod        | 19151;146664  | intergenic    | RP11-56H2.2,CENPVP3    | -,+      | lincRNA,ps   | 26120;80984  |
| 2025 | chrX  | 51965767  | - | chrX  | 51279899  | + | N | N | Y | N | N | invers_r   | na | NA   | intergenic    | RP11-363G10.2,XAGE   | +,+      | protein_cod        | 19409;146406  | intergenic    | RP11-56H2.2,CENPVP3    | -,+      | lincRNA,ps   | 26042;81062  |
| 2026 | chrX  | 72281484  | - | chrX  | 72255695  | + | N | N | Y | N | N | invers_r   | na | NA   | intergenic    | PABPC1L2B,PABPC1L    | -,+      | protein_cod        | 55933;15631   | intergenic    | PABPC1L2B,PABPC1L2     | -,+      | protein_cod  | 30144;41420  |
| 2027 | chrX  | 115294239 | - | chrX  | 115180688 | + | N | N | Y | N | N | invers_r   | na | NA   | intergenic    | API5P1,AGTR2         | -,+      | pseudogene         | 54556;7736    | intergenic    | AKR1B1P8,API5P1        | -,+      | pseudogene   | 5017;57486   |
| 2028 | chr1  | 2585587   | + | chr1  | 2584784   | + | N | N | N | N | Y | tandem_dup | na | NA   | intronic      | TTC34                | -        | protein_cod        | 0             | intronic      | TTC34                  | -        | protein_cod  | 0            |
| 2029 | chr1  | 2615874   | + | chr1  | 2583521   | + | N | N | Y | N | N | tandem_dup | na | NA   | intronic      | TTC34                | -        | protein_cod        | 0             | intronic      | TTC34                  | -        | protein_cod  | 0            |
| 2030 | chr1  | 2621352   | + | chr1  | 2615734   | + | Y | N | N | N | N | tandem_dup | na | NA   | intronic      | TTC34                | -        | protein_cod        | 0             | intronic      | TTC34                  | -        | protein_cod  | 0            |
| 2031 | chr1  | 2622924   | + | chr1  | 2620353   | + | N | N | N | Y | N | tandem_dup | na | NA   | intronic      | TTC34                | -        | protein_cod        | 0             | intronic      | TTC34                  | -        | protein_cod  | 0            |
| 2032 | chr1  | 2629920   | + | chr1  | 2615097   | + | N | Y | N | N | N | tandem_dup | na | NA   | intronic      | TTC34                | -        | protein_cod        | 0             | intronic      | TTC34                  | -        | protein_cod  | 0            |
| 2033 | chr1  | 2630063   | + | chr1  | 2584345   | + | Y | N | N | N | N | tandem_dup | na | NA   | intronic      | TTC34                | -        | protein_cod        | 0             | intronic      | TTC34                  | -        | protein_cod  | 0            |
| 2034 | chr1  | 2630586   | + | chr1  | 2615248   | + | N | N | N | N | Y | tandem_dup | na | NA   | intronic      | TTC34                | -        | protein_cod        | 0             | intronic      | TTC34                  | -        | protein_cod  | 0            |
| 2035 | chr1  | 2631124   | + | chr1  | 2615191   | + | N | N | N | Y | N | tandem_dup | na | NA   | intronic      | TTC34                | -        | protein_cod        | 0             | intronic      | TTC34                  | -        | protein_cod  | 0            |
| 2036 | chr1  | 14438565  | + | chr1  | 14436656  | + | N | N | N | Y | Y | tandem_dup | na | NA   | intergenic    | PRDM2,RNU6-1265P     | -,+      | protein_cod        | 286991;12163  | intergenic    | PRDM2,RNU6-1265P       | -,+      | protein_cod  | 285082;14072 |
| 2037 | chr1  | 14438567  | + | chr1  | 14436307  | + | N | N | Y | N | N | tandem_dup | na | NA   | intergenic    | PRDM2,RNU6-1265P     | -,+      | protein_cod        | 286993;12161  | intergenic    | PRDM2,RNU6-1265P       | -,+      | protein_cod  | 284733;14421 |
| 2038 | chr1  | 16386334  | + | chr1  | 16376519  | + | N | N | Y | N | N | tandem_dup | na | NA   | intronic,intr | FAM131C              | -        | protein_cod        | 0             | intronic,intr | CLCNKB                 | +        | protein_cod  | 0            |
| 2039 | chr1  | 16894068  | + | chr1  | 16890792  | + | Y | Y | Y | Y | Y | tandem_dup | na | NA   | intronic      | NBPF1                | -        | protein_cod        | 0             | intronic      | NBPF1                  | +        | protein_cod  | 0            |
| 2040 | chr1  | 24997299  | + | chr1  | 24994462  | + | N | Y | N | N | N | tandem_dup | na | NA   | intronic,intr | SRRM1                | +        | protein_cod        | 0             | intronic,intr | SRRM1                  | +        | protein_cod  | 0            |
| 2041 | chr1  | 25732109  | + | chr1  | 25613677  | + | N | N | Y | N | N | tandem_dup | na | NA   | intronic      | RHCE                 | -        | protein_cod        | 0             | intronic      | C1orf63,RHD            | -,+      | protein_cod  | 0            |
| 2042 | chr1  | 30878565  | + | chr1  | 29720840  | + | Y | Y | Y | Y | Y | tandem_dup | na | NA   | intergenic    | RP3-357I16.1,RP4-59' | -,+      | pseudogene         | 179103;3842   | intergenic    | RP3-437I16.1,AL139151. | -,+      | lincRNA,mif  | 44214;38153  |
| 2043 | chr1  | 121138274 | + | chr1  | 121137871 | + | N | N | N | N | Y | tandem_dup | na | NA   | ncRNA_intr    | RP11-343N15.1        | -        | lincRNA            | 0             | ncRNA_intr    | RP11-343N15.1          | -        | lincRNA      | 0            |
| 2044 | chr1  | 121138520 | + | chr1  | 121137795 | + | Y | N | Y | N | N | tandem_dup | na | NA   | ncRNA_intr    | RP11-343N15.1        | -        | lincRNA            | 0             | ncRNA_intr    | RP11-343N15.1          | -        | lincRNA      | 0            |
| 2045 | chr1  | 121138779 | + | chr1  | 121138700 | + | N | Y | N | Y | N | tandem_dup | na | NA   | ncRNA_exo     | AL592494.5           | +        | lincRNA            | 0             | ncRNA_intr    | RP11-343N15.1          | -        | lincRNA      | 0            |
| 2046 | chr1  | 121355584 | + | chr1  | 121351586 | + | N | N | N | N | Y | tandem_dup | na | VTNR | intergenic    | RP11-344P13.1,NONE   | -,NONE   | lincRNA,NC         | 33262;NONE    | intergenic    | RP11-344P13.1,NONE     | -,NONE   | lincRNA,NC   | 29264;NONE   |
| 2047 | chr1  | 142539510 | + | chr1  | 142537156 | + | N | N | N | N | Y | tandem_dup | na | NA   | intergenic    | NONE,RP11-417J8.1    | -,NONE,+ | lincRNA,NC         | NONE;13783    | intergenic    | NONE,RP11-417J8.1      | -,NONE,+ | lincRNA,NC   | NONE;16137   |
| 2048 | chr1  | 144954614 | + | chr1  | 144680038 | + | N | N | N | Y | Y | tandem_dup | na | NA   | intronic      | PDE4DIP              | +        | protein_cod        | 0             | upstream      | WIZ-1896O14.1          | -        | pseudogene   | 0            |
| 2049 | chr1  | 148855745 | + | chr1  | 148854275 | + | N | N | Y | N | N | tandem_dup | na | NA   | ncRNA_intr    | RP11-763B22.9        | -        | pseudogene         | 0             | ncRNA_intr    | RP11-763B22.9          | -        | pseudogene   | 0            |
| 2050 | chr1  | 162435796 | + | chr1  | 150753785 | + | N | N | N | Y | N | tandem_dup | na | NA   | intergenic    | SLAMF6P1,UHMK1       | -,+      | pseudogene         | 20120;31245   | downstream    | RP11-363I2.3           | +        | pseudogene   | 0            |
| 2051 | chr1  | 189441263 | + | chr1  | 188724848 | + | N | N | N | Y | N | tandem_dup | na | NA   | intergenic    | RP11-373J16.2,RNA5'  | -,+      | pseudogene         | 338840;194016 | intergenic    | RP11-316I3.1,RP11-316I | -,+      | lincRNA,linc | 44837;113760 |
| 2052 | chr1  | 202594536 | + | chr1  | 202594186 | + | N | N | N | Y | N | tandem_dup | na | NA   | intronic      | SYT2                 | -        | protein_cod        | 0             | intronic      | SYT2                   | -        | protein_cod  | 0            |
| 2053 | chr1  | 208653076 | + | chr1  | 103913905 | + | Y | Y | N | Y | N | tandem_dup | na | NA   | intergenic    | RP11-2P2.1,RP11-565  | -,+      | pseudogene         | 124355;227369 | intergenic    | RP11-347K2.2,RP11-153  | -,+      | lincRNA,linc | 77919;43596  |
| 2054 | chr1  | 213087828 | + | chr1  | 209627142 | + | N | Y | N | N | N | tandem_dup | na | NA   | intergenic    | FLVCR1,VASH2         | +,+      | protein_cod        | 15123;36034   | intergenic    | MIR205HG,RP1-272L16.   | +,+      | lincRNA,linc | 20959;74658  |
| 2055 | chr1  | 225248414 | + | chr1  | 225133381 | + | N | N | N | Y | N | tandem_dup | na | NA   | intronic      | DNAH14               | +        | protein_cod        | 0             | intronic      | DNAH14                 | +        | protein_cod  | 0            |
| 2056 | chr1  | 225248440 | + | chr1  | 225133514 | + | Y | N | N | N | N | tandem_dup | na | NA   | intronic      | DNAH14               | +        | protein_cod        | 0             | intronic      | DNAH14                 | +        | protein_cod  | 0            |
| 2057 | chr1  | 225248447 | + | chr1  | 225133422 | + | N | N | Y | N | N | tandem_dup | na | NA   | intronic      | DNAH14               | +        | protein_cod        | 0             | intronic      | DNAH14                 | +        | protein_cod  | 0            |
| 2058 | chr1  | 225293694 | + | chr1  | 225247315 | + | N | N | N | N | Y | tandem_dup | na | NA   | intronic      | DNAH14               | +        | protein_cod        | 0             | intronic      | DNAH14                 | +        | protein_cod  | 0            |
| 2059 | chr1  | 225293736 | + | chr1  | 225247384 | + | N | N | N | Y | N | tandem_dup | na | NA   | intronic      | DNAH14               | +        | protein_cod        | 0             | intronic      | DNAH14                 | +        | protein_cod  | 0            |
| 2060 | chr1  | 239440575 | + | chr1  | 239424007 | + | N | Y | Y | N | Y | tandem_dup | na | NA   | upstream      | RP11-544D21.1        | -        | lincRNA            | 0             | intergenic    | RP11-544D21.2,RP11-54  | -,+      | lincRNA,linc | 9889;9018    |
| 2061 | chr1  | 246410320 | + | chr1  | 246407289 | + | N | N | N | N | Y | tandem_dup | na | NA   | intronic      | SMYD3                | -        | protein_cod        | 0             | intronic      | SMYD3                  | -        | protein_cod  | 0            |
| 2062 | chr1  | 246410733 | + | chr1  | 246407293 | + | Y | Y | Y | Y | Y | tandem_dup | na | NA   | intronic      | SMYD3                | -        | protein_cod        | 0             | intronic      | SMYD3                  | -        | protein_cod  | 0            |
| 2063 | chr1  | 247383775 | + | chr1  | 246526396 | + | N | N | N | N | Y | tandem_dup | na | NA   | ncRNA_intr    | RP11-488L18.8        | -        | lincRNA            | 0             | intronic      | SMYD3                  | -        | protein_cod  | 0            |
| 2064 | chr1  | 247383999 | + | chr1  | 246526383 | + | Y | Y | N | N | N | tandem_dup | na | NA   | ncRNA_intr    | RP11-488L18.8        | -        | lincRNA            | 0             | intronic      | SMYD3                  | -        | protein_cod  | 0            |
| 2065 | chr10 | 3500943   | + | chr10 | 3500521   | + | N | N | N | N | Y | tandem_dup | na | NA   | intergenic    | RP11-195B3.1,RP11-4  | -,+      | lincRNA,linc       | 191736;28143  | intergenic    | RP11-195B3.1,RP11-482  | -,+      | lincRNA,linc | 191314;28565 |
| 2066 | chr10 | 3501152   | + | chr10 | 3500535   | + | N | N | Y | N | N | tandem_dup | na | NA   | intergenic    | RP11-195B3.1,RP11-4  | -,+      | lincRNA,linc       | 191945;27934  | intergenic    | RP11-195B3.1,RP11-482  | -,+      | lincRNA,linc | 191328;28551 |
| 2067 | chr10 | 7568745   | + | chr10 | 7568619   | + | Y | N | N | N | N | tandem_dup | na | NA   | intergenic    | RNU6-535P,RP11-385I  | -,+      | snRNA,anti         | 39974;6424    | intergenic    | RNU6-535P,RP11-385N2   | -,+      | snRNA,anti   | 39848;6550   |
| 2068 | chr10 | 7568947   | + | chr10 | 7568540   | + | N | N | N | N | Y | tandem_dup | na | NA   | intergenic    | RNU6-535P,RP11-385I  | -,+      | snRNA,anti         | 40176;6222    | intergenic    | RNU6-535P,RP11-385N2   | -,+      | snRNA,anti   | 39679;6719   |
| 2069 | chr10 | 7568978   | + | chr10 | 7568396   | + | N | N | Y | N | N | tandem_dup | na | NA   | intergenic    | RNU6-535P,RP11-385I  | -,+      | snRNA,anti         | 40207;6191    | intergenic    | RNU6-535P,RP11-385N2   | -,+      | snRNA,anti   | 39625;6773   |
| 2070 | chr10 | 14610733  | + | chr10 | 14610291  | + | N | N | N | Y | N | tandem_dup | na | NA   | intronic      | FAM107B              | -        | protein_cod        | 0             | intronic      | FAM107B                | -        | protein_cod  | 0            |
| 2071 | chr10 | 14610773  | + | chr10 | 14610259  | + | N | N | Y | N | Y | tandem_dup | na | NA   | intronic      | FAM107B              | -        | protein_cod        | 0             | intronic      | FAM107B                | -        | protein_cod  | 0            |
| 2072 | chr10 | 39086719  | + | chr10 | 39080756  | + | N | N | N | Y | N | tandem_dup | na | NA   | intergenic    | RP11-96F8.1,NONE     |          |                    |               |               |                        |          |              |              |

|      |       |           |   |       |           |   |   |   |   |   |   |            |    |      |            |                     |     |             |              |            |                       |         |             |              |
|------|-------|-----------|---|-------|-----------|---|---|---|---|---|---|------------|----|------|------------|---------------------|-----|-------------|--------------|------------|-----------------------|---------|-------------|--------------|
| 2095 | chr11 | 67592760  | + | chr11 | 3463795   | + | Y | N | N | N | N | tandem_dup | na | NA   | intergenic | FAM86C2P,RP11-119C  | -,+ | pseudogene  | 19953;15653  | intergenic | FAM86GP,RP13-726E.1   | -,+     | pseudogene  | 20069;26754  |
| 2096 | chr11 | 76904211  | + | chr11 | 76903855  | + | N | N | N | N | Y | tandem_dup | na | NA   | intronic   | MYO7A               | +   | protein_cod | 0            | intronic   | MYO7A                 | +       | protein_cod | 0            |
| 2097 | chr11 | 76904529  | + | chr11 | 76904241  | + | N | N | N | Y | N | tandem_dup | na | NA   | intronic   | MYO7A               | +   | protein_cod | 0            | intronic   | MYO7A                 | +       | protein_cod | 0            |
| 2098 | chr11 | 114482431 | + | chr11 | 114479623 | + | N | Y | N | N | N | tandem_dup | na | NA   | intergenic | NXPE4,NXPE2         | -,+ | protein_cod | 15947;66677  | intergenic | NXPE4,NXPE2           | -,+     | protein_cod | 13139;69485  |
| 2099 | chr11 | 114482450 | + | chr11 | 114479507 | + | N | N | N | Y | N | tandem_dup | na | NA   | intergenic | NXPE4,NXPE2         | -,+ | protein_cod | 15966;66658  | intergenic | NXPE4,NXPE2           | -,+     | protein_cod | 13023;69601  |
| 2100 | chr11 | 114482518 | + | chr11 | 114479590 | + | Y | N | N | N | N | tandem_dup | na | NA   | intergenic | NXPE4,NXPE2         | -,+ | protein_cod | 16034;66590  | intergenic | NXPE4,NXPE2           | -,+     | protein_cod | 13106;69518  |
| 2101 | chr11 | 124121310 | + | chr11 | 124110110 | + | Y | Y | Y | Y | Y | tandem_dup | na | NA   | exonic     | OR8G1               | +   | polymorphic | 0            | ncRNA_exo  | OR8G7                 | +       | pseudogene  | 0            |
| 2102 | chr11 | 131126487 | + | chr11 | 130625478 | + | N | Y | N | N | N | tandem_dup | na | NA   | ncRNA_intr | AP002856.5          | +   | lincRNA     | 0            | intergenic | C11orf44,PPP1R10P1    | +,+     | protein_cod | 38231;33648  |
| 2103 | chr11 | 131126716 | + | chr11 | 130625776 | + | N | N | N | N | Y | tandem_dup | na | NA   | ncRNA_intr | AP002856.5          | +   | lincRNA     | 0            | intergenic | C11orf44,PPP1R10P1    | +,+     | protein_cod | 38529;33350  |
| 2104 | chr12 | 8548959   | + | chr12 | 8541751   | + | Y | Y | Y | Y | N | tandem_dup | na | NA   | ncRNA_intr | LINC00937           | -   | lincRNA     | 0            | ncRNA_intr | LINC00937             | -       | lincRNA     | 0            |
| 2105 | chr12 | 11200308  | + | chr12 | 11173502  | + | N | N | N | N | Y | tandem_dup | na | NA   | downstream | TAS2R63P            | -   | pseudogene  | 0            | downstream | TAS2R19               | -       | protein_cod | 0            |
| 2106 | chr12 | 11213856  | + | chr12 | 11182894  | + | N | N | N | Y | N | tandem_dup | na | NA   | downstream | TAS2R46             | -   | protein_cod | 0            | downstream | TAS2R31               | -       | protein_cod | 0            |
| 2107 | chr12 | 11274230  | + | chr12 | 11174098  | + | N | N | N | N | Y | tandem_dup | na | NA   | intergenic | RP11-673D15.7,TAS2f | -,+ | pseudogene  | 24357;11327  | downstream | TAS2R19               | -       | protein_cod | 0            |
| 2108 | chr12 | 11275888  | + | chr12 | 11204715  | + | Y | N | Y | N | Y | tandem_dup | na | NA   | intergenic | RP11-673D15.7,TAS2f | -,+ | pseudogene  | 26015;9669   | intergenic | TAS2R63P,TAS2R46      | -,+     | pseudogene  | 2860;9249    |
| 2109 | chr12 | 11284305  | + | chr12 | 11181649  | + | N | N | N | N | Y | tandem_dup | na | NA   | intergenic | RP11-673D15.7,TAS2f | -,+ | pseudogene  | 34432;1252   | intergenic | TAS2R19,TAS2R31       | -,+     | protein_cod | 6430;1337    |
| 2110 | chr12 | 21288183  | + | chr12 | 21238731  | + | Y | N | N | N | N | tandem_dup | na | NA   | intronic   | SLCO1B1,RP11-1250   | +,+ | protein_cod | 0            | intronic   | SLCO1B3,SLCO1B7,LS1   | +,+,+,+ | protein_cod | 0            |
| 2111 | chr12 | 21288217  | + | chr12 | 21238871  | + | N | Y | Y | N | Y | tandem_dup | na | NA   | intronic   | SLCO1B1,RP11-1250   | +,+ | protein_cod | 0            | intronic   | SLCO1B3,SLCO1B7,LS1   | +,+,+,+ | protein_cod | 0            |
| 2112 | chr12 | 21288433  | + | chr12 | 21239099  | + | N | N | N | Y | N | tandem_dup | na | NA   | intronic   | SLCO1B1,RP11-1250   | +,+ | protein_cod | 0            | intronic   | SLCO1B3,SLCO1B7,LS1   | +,+,+,+ | protein_cod | 0            |
| 2113 | chr12 | 31272203  | + | chr12 | 9560034   | + | Y | N | N | N | N | tandem_dup | na | NA   | ncRNA_exo  | RP11-551L14.1       | -   | pseudogene  | 0            | ncRNA_intr | RP11-599J14.2         | -       | pseudogene  | 0            |
| 2114 | chr12 | 31272487  | + | chr12 | 9559077   | + | N | N | N | N | Y | tandem_dup | na | NA   | ncRNA_exo  | RP11-551L14.1       | -   | pseudogene  | 0            | ncRNA_intr | RP11-599J14.2         | -       | pseudogene  | 0            |
| 2115 | chr12 | 31272542  | + | chr12 | 9559824   | + | N | Y | N | N | N | tandem_dup | na | NA   | ncRNA_intr | RP11-551L14.1       | -   | pseudogene  | 0            | ncRNA_intr | RP11-599J14.2         | -       | pseudogene  | 0            |
| 2116 | chr12 | 31273640  | + | chr12 | 31270878  | + | N | N | N | N | Y | tandem_dup | na | NA   | ncRNA_intr | RP11-551L14.1       | -   | pseudogene  | 0            | ncRNA_intr | RP11-551L14.1         | -       | pseudogene  | 0            |
| 2117 | chr12 | 31273656  | + | chr12 | 9558553   | + | N | N | Y | N | N | tandem_dup | na | NA   | ncRNA_intr | RP11-551L14.1       | -   | pseudogene  | 0            | ncRNA_intr | RP11-599J14.2         | -       | pseudogene  | 0            |
| 2118 | chr12 | 31273989  | + | chr12 | 31270871  | + | N | N | N | Y | N | tandem_dup | na | NA   | ncRNA_intr | RP11-551L14.1       | -   | pseudogene  | 0            | ncRNA_intr | RP11-551L14.1         | -       | pseudogene  | 0            |
| 2119 | chr12 | 31274023  | + | chr12 | 9558742   | + | N | Y | N | N | N | tandem_dup | na | NA   | ncRNA_intr | RP11-551L14.1       | -   | pseudogene  | 0            | ncRNA_intr | RP11-599J14.2         | -       | pseudogene  | 0            |
| 2120 | chr12 | 31274028  | + | chr12 | 31270911  | + | Y | N | N | N | N | tandem_dup | na | NA   | ncRNA_intr | RP11-551L14.1       | -   | pseudogene  | 0            | ncRNA_intr | RP11-551L14.1         | -       | pseudogene  | 0            |
| 2121 | chr12 | 31274046  | + | chr12 | 9558548   | + | N | N | N | Y | N | tandem_dup | na | NA   | ncRNA_intr | RP11-551L14.1       | -   | pseudogene  | 0            | ncRNA_intr | RP11-599J14.2         | -       | pseudogene  | 0            |
| 2122 | chr12 | 31274074  | + | chr12 | 9558702   | + | Y | N | N | N | N | tandem_dup | na | NA   | ncRNA_intr | RP11-551L14.1       | -   | pseudogene  | 0            | ncRNA_intr | RP11-599J14.2         | -       | pseudogene  | 0            |
| 2123 | chr12 | 38720293  | + | chr12 | 34185572  | + | N | Y | N | N | N | tandem_dup | na | NA   | intergenic | ALG10B,AC087897.1   | +,+ | protein_cod | 2509;146353  | ncRNA_intr | RP11-847H18.2         | -       | antisense   | 0            |
| 2124 | chr12 | 108757741 | + | chr12 | 108757565 | + | N | N | N | N | Y | tandem_dup | na | VNTR | intergenic | CMKLR1,RP11-13G14   | -,+ | protein_cod | 24623;70166  | intergenic | CMKLR1,RP11-13G14.4   | -,+     | protein_cod | 24447;70342  |
| 2125 | chr12 | 124923589 | + | chr12 | 124923341 | + | N | N | Y | N | N | tandem_dup | na | NA   | intronic   | NCOR2               | -   | protein_cod | 0            | intronic   | NCOR2                 | -       | protein_cod | 0            |
| 2126 | chr12 | 126085333 | + | chr12 | 126062628 | + | Y | Y | Y | Y | Y | tandem_dup | na | NA   | intronic   | TMEM132B            | +   | protein_cod | 0            | intronic   | TMEM132B              | +       | protein_cod | 0            |
| 2127 | chr13 | 27547704  | + | chr13 | 27546837  | + | Y | Y | Y | Y | Y | tandem_dup | na | NA   | intergenic | FGFR1OP2P1,RPS21I   | +,+ | pseudogene  | 67706;3976   | intergenic | FGFR1OP2P1,RPS21P8    | +,+     | pseudogene  | 66839;4843   |
| 2128 | chr13 | 28509336  | + | chr13 | 28509187  | + | Y | N | N | N | N | tandem_dup | na | NA   | intergenic | PDX1,ATP5EP2        | +,+ | protein_cod | 8968;10007   | intergenic | PDX1,ATP5EP2          | +,+     | protein_cod | 8819;10156   |
| 2129 | chr13 | 28509417  | + | chr13 | 28508805  | + | N | Y | N | Y | Y | tandem_dup | na | NA   | intergenic | PDX1,ATP5EP2        | +,+ | protein_cod | 9049;9926    | intergenic | PDX1,ATP5EP2          | +,+     | protein_cod | 8437;10538   |
| 2130 | chr13 | 28509417  | + | chr13 | 28509010  | + | N | N | Y | N | N | tandem_dup | na | NA   | intergenic | PDX1,ATP5EP2        | +,+ | protein_cod | 9049;9926    | intergenic | PDX1,ATP5EP2          | +,+     | protein_cod | 8642;10333   |
| 2131 | chr13 | 29920761  | + | chr13 | 29785545  | + | N | N | N | Y | N | tandem_dup | na | NA   | intronic   | MTUS2               | +,+ | protein_cod | 0            | intronic   | MTUS2                 | +,+     | protein_cod | 0            |
| 2132 | chr13 | 36532289  | + | chr13 | 36530759  | + | N | Y | N | N | N | tandem_dup | na | NA   | intronic   | DCLK1               | +,+ | protein_cod | 0            | intronic   | DCLK1                 | +,+     | protein_cod | 0            |
| 2133 | chr13 | 42947655  | + | chr13 | 42947268  | + | Y | Y | Y | Y | Y | tandem_dup | na | NA   | intergenic | FABP3P2,TNFSF11     | -,+ | pseudogene  | 3862;189217  | intergenic | FABP3P2,TNFSF11       | -,+     | pseudogene  | 3475;189604  |
| 2134 | chr13 | 97159872  | + | chr13 | 97159357  | + | Y | N | N | N | N | tandem_dup | na | NA   | intronic   | HS6ST3              | +   | protein_cod | 0            | intronic   | HS6ST3                | +       | protein_cod | 0            |
| 2135 | chr13 | 98505032  | + | chr13 | 98504919  | + | N | Y | Y | Y | N | tandem_dup | na | VNTR | intergenic | RP11-120E13.1,snoU1 | +,+ | lincRNA,snc | 174815;33031 | intergenic | RP11-120E13.1,snoU13  | +,+     | lincRNA,snc | 174702;33144 |
| 2136 | chr13 | 98505313  | + | chr13 | 98504921  | + | Y | N | N | N | Y | tandem_dup | na | VNTR | intergenic | RP11-120E13.1,snoU1 | +,+ | lincRNA,snc | 175096;32750 | intergenic | RP11-120E13.1,snoU13  | +,+     | lincRNA,snc | 174704;33142 |
| 2137 | chr14 | 33347576  | + | chr14 | 33349684  | + | Y | Y | Y | Y | Y | tandem_dup | na | NA   | intergenic | AKAP6,NPAS3         | +,+ | protein_cod | 47009;56563  | intergenic | AKAP6,NPAS3           | +,+     | protein_cod | 29117;74455  |
| 2138 | chr14 | 39600174  | + | chr14 | 39282625  | + | N | Y | Y | Y | Y | tandem_dup | na | NA   | intronic   | GEM2                | +   | protein_cod | 0            | ncRNA_intr | LINC00639             | -       | lincRNA     | 0            |
| 2139 | chr14 | 48339640  | + | chr14 | 20294415  | + | Y | Y | Y | Y | Y | tandem_dup | na | NA   | intergenic | RNU6-297P,RP11-2G1  | +   | snRNA,lincf | 29105;26071  | intronic   | ORAN2                 | -       | protein_cod | 0            |
| 2140 | chr14 | 50192356  | + | chr14 | 50192041  | + | N | Y | Y | N | Y | tandem_dup | na | NA   | intronic   | KLHDC1              | +   | protein_cod | 0            | intronic   | KLHDC1                | +       | protein_cod | 0            |
| 2141 | chr14 | 94846684  | + | chr14 | 94830087  | + | N | N | N | Y | N | tandem_dup | na | NA   | intronic   | SERPINA1            | -   | protein_cod | 0            | ncRNA_exo  | SERPINA2P             | -       | pseudogene  | 0            |
| 2142 | chr14 | 94846743  | + | chr14 | 94830068  | + | N | Y | Y | N | Y | tandem_dup | na | NA   | intronic   | SERPINA1            | -   | protein_cod | 0            | ncRNA_exo  | SERPINA2P             | -       | pseudogene  | 0            |
| 2143 | chr14 | 106227299 | + | chr14 | 106082702 | + | Y | N | N | N | N | tandem_dup | na | NA   | intergenic | IGHG1,IGHG3         | -,+ | IG_C_gene   | 17891;8140   | intergenic | RP11-731F5.1,IGHG4    | -,+     | lincRNA,IG  | 11008;7985   |
| 2144 | chr14 | 106227330 | + | chr14 | 106082739 | + | N | Y | Y | N | N | tandem_dup | na | NA   | intergenic | IGHG1,IGHG3         | -,+ | IG_C_gene   | 17922;8109   | intergenic | RP11-731F5.1,IGHG4    | -,+     | lincRNA,IG  | 11045;7948   |
| 2145 | chr14 | 106227334 | + | chr14 | 106082667 | + | N | Y | N | Y | Y | tandem_dup | na | NA   | intergenic | IGHG1,IGHG3         | -,+ | IG_C_gene   | 17926;8105   | intergenic | RP11-731F5.1,IGHG4    | -,+     | lincRNA,IG  | 10973;8020   |
| 2146 | chr14 | 106598867 | + | chr14 | 106465542 | + | N | Y | N | N | N | tandem_dup | na | NA   | downstream | IGHVII-13-1         | -   | IG_V_pseu   | 0            | intergenic | IGHV1-2,IGHVIII-2-1   | -,+     | IG_V_gene   | 12372;2135   |
| 2147 | chr14 | 106598875 | + | chr14 | 106465798 | + | Y | N | Y | N | N | tandem_dup | na | NA   | downstream | IGHVII-13-1         | -   | IG_V_pseu   | 0            | intergenic | IGHV1-2,IGHVIII-2-1   | -,+     | IG_V_gene   | 12628;1879   |
| 2148 | chr15 | 24799349  | + | chr15 | 24486265  | + | N | N | N | Y | N | tandem_dup | na | NA   | ncRNA_intr | PWRN1               | -   | lincRNA     | 0            | ncRNA_intr | RP11-580I1.1          | +       | lincRNA     | 0            |
| 2149 | chr15 | 58777684  | + | chr15 | 58776414  | + | Y | Y | Y | Y | Y | tandem_dup | na | NA   | ncRNA_intr | RP11-355N15.1       | -   | antisense   | 0            | ncRNA_intr | RP11-355N15.1         | -       | antisense   | 0            |
| 2150 | chr15 | 77992104  | + | chr15 | 77991666  | + | Y | Y | N | N | Y | tandem_dup | na | NA   | intronic   | LINGO1              | -,+ | protein_cod | 0            | intronic   | LINGO1                | -,+     | protein_cod | 0            |
| 2151 | chr15 | 92293062  | + | chr15 | 92292497  | + | N | N | N | N | Y | tandem_dup | na | NA   | intergenic | CTD-2343P13.1,snoU' | -,+ | pseudogene  | 5877;85547   | intergenic | CTD-2343P13.1,snoU13  | -,+     | pseudogene  | 5312;86112   |
| 2152 | chr15 | 92293435  | + | chr15 | 92292535  | + | Y | N | N | N | N | tandem_dup | na | NA   | intergenic | CTD-2343P13.1,snoU' | -,+ | pseudogene  | 6250;85174   | intergenic | CTD-2343P13.1,snoU13  | -,+     | pseudogene  | 5350;86074   |
| 2153 | chr16 | 22700792  | + | chr16 | 22699322  | + | N | N | N | Y | N | tandem_dup | na | NA   | intergenic | RN7SL245P,HS3ST2    | -,+ | misc_RNA,4  | 57277;124706 | intergenic | RN7SL245P,HS3ST2      | -,+     | misc_RNA,4  | 51257;126176 |
| 2154 | chr16 | 26386328  | + | chr16 | 26385365  | + | N | N | N | Y | N | tandem_dup | na | NA   | intergenic | AC130464.1,AC002331 | -,+ | pseudogene  | 16652;209748 | intergenic | AC130464.1,AC002331.1 | -,+     | pseudogene  | 15689;210711 |
| 2155 | chr16 | 26386374  | + | chr16 | 26385335  | + | N | N | Y | N | N | tandem_dup | na | NA   | intergenic | AC130464.1,AC002331 | -,+ | pseudogene  | 16698        |            |                       |         |             |              |















|      |       |           |   |      |           |   |   |   |   |   |   |              |              |    |            |                     |                      |             |               |               |               |                       |             |             |                |
|------|-------|-----------|---|------|-----------|---|---|---|---|---|---|--------------|--------------|----|------------|---------------------|----------------------|-------------|---------------|---------------|---------------|-----------------------|-------------|-------------|----------------|
| 2767 | chr11 | 69139814  | - | chr3 | 128165155 | - | N | N | N | Y | N | transl_inter | na           | NA | intergenic | IFITM9P,RP11-211G23 | +                    | pseudogene  | 68540;46417   | intergenic    | EEFSEC,DNAJB8 | +                     | protein_cod | 37670;16127 |                |
| 2768 | chr11 | 98640894  | - | chr3 | 56618171  | - | N | Y | N | N | N | transl_inter | na           | NA | intergenic | RP11-115E19.1,RP11- | +                    | lincRNA,inc | 86429;168748  | intronic      | CCDC66        | +                     | protein_cod | 0           |                |
| 2769 | chr11 | 98640944  | - | chr3 | 56617885  | - | N | N | N | N | Y | N            | transl_inter | na | NA         | intergenic          | RP11-115E19.1,RP11-  | +           | lincRNA,inc   | 86479;168698  | intronic      | CCDC66                | +           | protein_cod | 0              |
| 2770 | chr11 | 101089882 | - | chr3 | 32084103  | - | N | Y | N | N | N | N            | transl_inter | na | NA         | intergenic          | RP11-788M5.3,TRPC6   | +           | pseudogene    | 9560;232413   | intergenic    | SNORA25,Y_RNA         | +           | snoRNA,mi   | 4958;3262      |
| 2771 | chr11 | 110801941 | - | chr3 | 50022157  | - | N | N | N | N | Y | N            | transl_inter | na | NA         | intergenic          | RP11-9714.1,RNA5SF   | +           | pseudogene    | 54040;108881  | intronic      | RBM6                  | +           | protein_cod | 0              |
| 2772 | chr11 | 45399251  | - | chr3 | 196318459 | + | N | N | Y | N | N | N            | transl_inter | na | NA         | ncRNA_intr          | RP11-430H10.2        | +           | lincRNA       | 0             | intergenic;ir | FBXO45,LINC01063      | +           | protein_cod | 2529;39910     |
| 2773 | chr11 | 62609240  | - | chr3 | 73160183  | + | N | Y | Y | Y | Y | Y            | transl_inter | na | NA         | ncRNA_exo           | RNU2-2P              | +           | snRNA         | 0             | ncRNA_exo     | RNU2-64P              | +           | snRNA       | 0              |
| 2774 | chr11 | 36157463  | + | chr3 | 51630116  | - | N | Y | Y | Y | Y | N            | transl_inter | na | NA         | intronic            | LDLRAD3              | +           | protein_cod   | 0             | intronic      | RAD54L2               | +           | protein_cod | 0              |
| 2775 | chr11 | 41510677  | + | chr3 | 144991045 | - | N | N | N | N | N | Y            | transl_inter | na | NA         | intergenic          | LRRC4C,RP11-124G5    | +           | protein_cod   | 29354;29768   | intergenic    | RNA5SP144,RP11-622L   | +           | rRNA,pseu   | 1085183;250280 |
| 2776 | chr11 | 45399251  | + | chr3 | 196318459 | - | Y | N | N | N | N | N            | transl_inter | na | NA         | ncRNA_intr          | RP11-430H10.2        | +           | lincRNA       | 0             | intergenic;ir | FBXO45,LINC01063      | +           | protein_cod | 2529;39910     |
| 2777 | chr11 | 48363988  | + | chr3 | 97919584  | - | Y | N | N | N | N | N            | transl_inter | na | NA         | intergenic          | OR4C3,OR4C4P         | +           | protein_cod   | 16481;2912    | intergenic    | OR5H5P,OR5H3P         | +           | pseudogene  | 2602;6683      |
| 2778 | chr11 | 48364073  | + | chr3 | 97919189  | - | N | N | Y | N | N | N            | transl_inter | na | NA         | intergenic          | OR4C3,OR4C4P         | +           | protein_cod   | 16566;2827    | intergenic    | OR5H5P,OR5H3P         | +           | pseudogene  | 2207;7078      |
| 2779 | chr11 | 62609281  | + | chr3 | 73160133  | - | N | Y | Y | Y | Y | Y            | transl_inter | na | NA         | ncRNA_UTT           | WDR74,RNU2-2P        | +           | snRNA         | 0             | upstream      | RNU2-64P              | +           | snRNA       | 0              |
| 2780 | chr11 | 23038137  | + | chr3 | 81055241  | + | N | Y | Y | Y | Y | Y            | transl_inter | na | NA         | intergenic;in       | RP11-17A1.3,RP11-26  | +           | antisense,lir | 71198;148309  | ncRNA_intr    | RP11-6B4.1            | +           | lincRNA     | 0              |
| 2781 | chr11 | 47640420  | + | chr3 | 137254465 | + | Y | Y | N | N | Y | N            | transl_inter | na | NA         | exonic              | MTCH2                | +           | protein_cod   | 0             | ncRNA_exo     | RP11-575C1.1          | +           | pseudogene  | 0              |
| 2782 | chr11 | 47640453  | + | chr3 | 137254480 | + | N | N | Y | N | N | N            | transl_inter | na | NA         | exonic              | MTCH2                | +           | protein_cod   | 0             | ncRNA_exo     | RP11-575C1.1          | +           | pseudogene  | 0              |
| 2783 | chr11 | 80835400  | + | chr3 | 125585081 | + | N | N | N | N | N | Y            | transl_inter | na | NA         | intergenic          | RP11-170L9.1,RP11-6i | +           | pseudogene    | 166723;427868 | ncRNA_intr    | ENPP7P4,RP11-379B18   | +           | pseudogene  | 0              |
| 2784 | chr11 | 91777746  | + | chr3 | 21769125  | + | N | N | N | N | N | Y            | transl_inter | na | NA         | intergenic          | TUBB4BP4,RPL7AP57    | +           | pseudogene    | 94546;116526  | intronic      | ZNF385D               | +           | protein_cod | 0              |
| 2785 | chr11 | 98640865  | + | chr3 | 56617947  | + | N | N | N | N | Y | N            | transl_inter | na | NA         | intergenic          | RP11-115E19.1,RP11-  | +           | lincRNA,inc   | 86400;168777  | intronic      | CCDC66                | +           | protein_cod | 0              |
| 2786 | chr11 | 73777267  | - | chr4 | 148181587 | - | N | N | N | Y | N | N            | transl_inter | na | NA         | intronic            | C2CD3                | +           | protein_cod   | 0             | intergenic    | RP11-292D4.3,MIR548G  | +           | lincRNA,mif | 251290;84194   |
| 2787 | chr11 | 101090232 | + | chr4 | 70059023  | - | N | N | Y | N | N | N            | transl_inter | na | NA         | intergenic          | RP11-788M5.3,TRPC6   | +           | pseudogene    | 9910;232063   | ncRNA_intr    | RP11-704M14.1         | +           | antisense   | 0              |
| 2788 | chr11 | 62232318  | + | chr4 | 97777922  | + | N | Y | N | Y | N | N            | transl_inter | na | NA         | intronic            | AHNAK                | +           | protein_cod   | 0             | ncRNA_intr    | RP11-145G20.1         | +           | lincRNA     | 0              |
| 2789 | chr11 | 88040149  | + | chr4 | 187971474 | + | N | Y | Y | N | N | Y            | transl_inter | na | NA         | intronic            | CTSC                 | +           | protein_cod   | 0             | intergenic    | RP11-217E13.1,RP11-69 | +           | lincRNA,inc | 28347;9779     |
| 2790 | chr11 | 39001735  | - | chr5 | 152632712 | - | N | N | Y | Y | Y | Y            | transl_inter | na | NA         | intergenic          | RP11-64I17.1,RP11-31 | +           | lincRNA,pse   | 305944;181268 | intergenic    | AC091969.1,GRIA1      | +           | lincRNA,prc | 29609;237394   |
| 2791 | chr11 | 40493160  | - | chr5 | 63771939  | - | N | Y | N | Y | Y | N            | transl_inter | na | NA         | intronic            | LRRRC4C              | +           | protein_cod   | 0             | ncRNA_intr    | AC016561.1            | +           | pseudogene  | 0              |
| 2792 | chr11 | 102685813 | - | chr5 | 87420970  | + | N | N | Y | N | N | N            | transl_inter | na | NA         | ncRNA_intr          | WTAPP1               | +           | pseudogene    | 0             | intergenic    | CTD-2316B1.2,TMEM16   | +           | lincRNA,prc | 391884;64480   |
| 2793 | chr11 | 102686290 | - | chr5 | 87420923  | + | Y | N | N | N | N | N            | transl_inter | na | NA         | ncRNA_intr          | WTAPP1               | +           | pseudogene    | 0             | intergenic    | CTD-2316B1.2,TMEM16   | +           | lincRNA,prc | 391837;64527   |
| 2794 | chr11 | 76889781  | + | chr5 | 180061849 | - | N | N | N | Y | N | N            | transl_inter | na | NA         | intronic            | MYO4                 | +           | protein_cod   | 0             | intronic      | FLT4                  | +           | protein_cod | 0              |
| 2795 | chr11 | 40493095  | + | chr5 | 63771996  | + | Y | N | N | N | N | N            | transl_inter | na | NA         | intronic            | LRRRC4C              | +           | protein_cod   | 0             | ncRNA_intr    | AC016561.1            | +           | pseudogene  | 0              |
| 2796 | chr11 | 56474806  | - | chr6 | 139666818 | - | N | Y | Y | N | N | N            | transl_inter | na | NA         | intergenic          | OR9G1,RP11-100N3.2   | +           | protein_cod   | 6025;28986    | intergenic    | RP11-12A2.1,CITED2    | +           | pseudogene  | 6101;26575     |
| 2797 | chr11 | 89927278  | - | chr6 | 146528283 | - | Y | N | N | N | Y | Y            | transl_inter | na | NA         | ncRNA_intr          | DISC1F1P1            | +           | processed_    | 0             | intronic      | GRM1                  | +           | protein_cod | 0              |
| 2798 | chr11 | 30696488  | - | chr6 | 51003201  | + | N | N | N | N | N | Y            | transl_inter | na | NA         | intergenic          | RP5-1024C24.1,DCDC   | +           | antisense,pi  | 44433;155428  | intergenic    | FTH1P5,RP3-437C15.2   | +           | pseudogene  | 122232;246879  |
| 2799 | chr11 | 71863065  | - | chr6 | 160656494 | + | N | N | N | N | N | Y            | transl_inter | na | NA         | intergenic          | FOLR3,RP11-807H22    | +           | protein_cod   | 12129;6801    | intronic;intr | SLC22A2               | +           | protein_cod | 0              |
| 2800 | chr11 | 71863126  | - | chr6 | 160656494 | + | N | N | Y | N | N | N            | transl_inter | na | NA         | intergenic          | FOLR3,RP11-807H22    | +           | protein_cod   | 12190;6740    | intronic;intr | SLC22A2               | +           | protein_cod | 0              |
| 2801 | chr11 | 71863159  | - | chr6 | 160656527 | + | N | N | N | N | Y | N            | transl_inter | na | NA         | intergenic          | FOLR3,RP11-807H22    | +           | protein_cod   | 12223;6707    | intronic      | SLC22A2               | +           | protein_cod | 0              |
| 2802 | chr11 | 103792603 | - | chr6 | 108906546 | + | N | N | Y | N | N | N            | transl_inter | na | NA         | intronic;intr       | PDGFD                | +           | protein_cod   | 0             | intronic;intr | FOXO3                 | +           | protein_cod | 0              |
| 2803 | chr11 | 129179381 | - | chr6 | 66561417  | + | N | N | Y | Y | N | N            | transl_inter | na | NA         | intergenic          | ZNF123P,BARX2        | +           | pseudogene    | 13005;66454   | intergenic;ir | ADH5P4,NUFIP1P        | +           | pseudogene  | 13470;241907   |
| 2804 | chr11 | 129179413 | - | chr6 | 66561417  | + | N | Y | N | N | N | N            | transl_inter | na | NA         | intergenic          | ZNF123P,BARX2        | +           | pseudogene    | 13037;66422   | intergenic;ir | ADH5P4,NUFIP1P        | +           | pseudogene  | 13470;241907   |
| 2805 | chr11 | 103792603 | + | chr6 | 108906546 | - | Y | N | Y | N | N | N            | transl_inter | na | NA         | intronic;intr       | PDGFD                | +           | protein_cod   | 0             | intronic;intr | FOXO3                 | +           | protein_cod | 0              |
| 2806 | chr11 | 118293792 | + | chr6 | 10762811  | - | N | N | Y | Y | N | N            | transl_inter | na | NA         | intronic            | ATP5L                | +           | protein_cod   | 0             | intronic      | TMEM148,SYCP2L,RP1    | +           | protein_cod | 0              |
| 2807 | chr11 | 4420586   | + | chr6 | 133938218 | + | N | N | N | Y | N | N            | transl_inter | na | NA         | intergenic          | TRIM21,OR5R1R1P      | +           | protein_cod   | 5660;18704    | ncRNA_intr    | RP3-323P13.2          | +           | antisense   | 0              |
| 2808 | chr11 | 18522922  | - | chr7 | 142930319 | - | N | N | N | N | Y | N            | transl_inter | na | NA         | intronic            | TSG101               | +           | protein_cod   | 0             | intergenic    | TAS2R40,GSTK1         | +           | protein_cod | 10157;10867    |
| 2809 | chr11 | 27655293  | - | chr7 | 83089911  | + | N | N | N | N | N | Y            | transl_inter | na | NA         | ncRNA_intr          | BONF-AS,LINC00678    | +           | antisense,lir | 0             | intronic      | SEMA3E                | +           | protein_cod | 0              |
| 2810 | chr11 | 27655327  | - | chr7 | 83090089  | + | N | N | Y | N | N | N            | transl_inter | na | NA         | ncRNA_intr          | BONF-AS,LINC00678    | +           | antisense,lir | 0             | intronic      | SEMA3E                | +           | protein_cod | 0              |
| 2811 | chr11 | 37072875  | - | chr7 | 121298038 | + | N | N | N | Y | N | N            | transl_inter | na | NA         | intergenic          | CTD-2119L1.1,SNOR#   | +           | pseudogene    | 353458;650800 | intergenic    | RP4-745K6.1,RN7SKP27  | +           | lincRNA,mi  | 7624;78459     |
| 2812 | chr11 | 27655412  | + | chr7 | 83089930  | - | Y | N | N | N | N | N            | transl_inter | na | NA         | ncRNA_intr          | BONF-AS,LINC00678    | +           | antisense,lir | 0             | intronic      | SEMA3E                | +           | protein_cod | 0              |
| 2813 | chr11 | 131230891 | + | chr7 | 57922944  | - | N | N | Y | N | N | N            | transl_inter | na | NA         | intergenic          | AP002856.5,NTM       | +           | lincRNA,pro   | 10079;9482    | intergenic    | RP11-548K12.12,NONE   | +           | pseudogene  | 26192;NONE     |
| 2814 | chr11 | 85211622  | + | chr7 | 107629251 | + | Y | Y | Y | Y | Y | Y            | transl_inter | na | NA         | intronic            | DLG2                 | +           | protein_cod   | 0             | intronic      | NRCAM                 | +           | protein_cod | 0              |
| 2815 | chr11 | 103201267 | + | chr7 | 32226014  | + | N | N | N | N | N | N            | transl_inter | na | NA         | intronic            | DYNC2H1              | +           | protein_cod   | 0             | intronic      | PDE1C                 | +           | protein_cod | 0              |
| 2816 | chr11 | 3560915   | - | chr8 | 12447424  | - | N | N | N | Y | N | N            | transl_inter | na | NA         | ncRNA_intr          | RP13-726E6.2         | +           | processed_    | 0             | intergenic    | RP11-303G3.6,RPS3AP3  | +           | pseudogene  | 35952;11461    |
| 2817 | chr11 | 48446710  | - | chr8 | 135320972 | - | Y | N | N | N | N | N            | transl_inter | na | NA         | intergenic          | OR4C2P,OR4C10P       | +           | pseudogene    | 3885;7059     | ncRNA_intr    | RP11-513H8.1          | +           | lincRNA     | 0              |
| 2818 | chr11 | 131127850 | - | chr8 | 30993366  | - | N | Y | N | N | N | N            | transl_inter | na | NA         | ncRNA_intr          | AP002856.5           | +           | lincRNA       | 0             | intronic      | CSDM1                 | +           | protein_cod | 0              |
| 2819 | chr11 | 134343365 | - | chr8 | 5377762   | - | Y | Y | Y | Y | Y | Y            | transl_inter | na | NA         | ncRNA_intr          | RP11-627G23.1        | +           | processed_    | 0             | intergenic    | RP5-991O23.1,RP11-281 | +           | lincRNA,inc | 11114;139439   |
| 2820 | chr11 | 50758969  | + | chr8 | 43776708  | - | N | Y | N | N | N | N            | transl_inter | na | NA         | intergenic          | RP11-574M7.2,AC110;  | +           | pseudogene    | 377482;505040 | intergenic    | RP11-643N23.1,NONE    | +           | pseudogene  | 237364;NONE    |
| 2821 | chr11 | 94489274  | + | chr9 | 93051706  | + | N | Y | N | N | N | N            | transl_inter | na | NA         | intronic            | AMOTL1               | +           | protein_cod   | 0             | intergenic    | OR7E116P,RP11-389K14  | +           | pseudogene  | 56283;11478    |
| 2822 | chr11 | 55826098  | + | chr9 | 68418844  | - | N | Y | Y | Y | N | N            | transl_inter | na | NA         | intergenic          | OR5AQ1P,OR5J1P       | +           | pseudogene    | 3319;12408    | intergenic;ir | MIR4477A,RP11-764K9.1 | +           | miRNA,pse   | 3456;9017      |
| 2823 | chr11 | 62095038  | + | chr9 | 68418844  | - | N | Y | N | N | Y | Y            | transl_inter | na | NA         | intergenic          | SCGB1D4,NPM1P35      | +           | protein_cod   | 28502;3380    | intergenic;ir | MIR4477A,RP11-764K9.1 | +           | miRNA,pse   | 3456;9017      |
| 2824 | chr11 | 24393106  | + | chr9 | 31877038  | + | N | Y | N | N | Y | N            | transl_inter | na | NA         | intergenic          | RP11-2F20.1,Y_RNA    | +           | lincRNA,mi    | 109342;84351  | intergenic    | HMG3P23,RNA5SP281     | +           | pseudogene  | 231880;416518  |
| 2825 | chr11 | 37456333  | - | chrX | 109143697 | - | N | N | N | N | N | Y            | transl_inter | na | NA         | intergenic          | CTD-2119L1.1,SNOR#   | +           | pseudogene    | 736916;267342 | intergenic    | RPS5P7,TMEM164        | +           | pseudogene  | 46549;102166   |
| 2826 | chr11 | 63680360  | - | chrX | 10        |   |   |   |   |   |   |              |              |    |            |                     |                      |             |               |               |               |                       |             |             |                |





|      |       |           |   |       |           |   |   |   |   |   |   |              |    |    |               |                      |        |              |              |               |                       |        |               |               |
|------|-------|-----------|---|-------|-----------|---|---|---|---|---|---|--------------|----|----|---------------|----------------------|--------|--------------|--------------|---------------|-----------------------|--------|---------------|---------------|
| 3019 | chr14 | 24263525  | + | chr4  | 42678272  | - | N | Y | N | N | N | transl_inter | na | NA | intergenic    | RN7SKP205,RP11-381   | +-     | misc_RNA,i   | 2080;31320   | intergenic    | RP11-109E24.2,RP11-10 | ++     | antisense,lir | 18327;29852   |
| 3020 | chr14 | 52667767  | + | chr4  | 170280994 | + | Y | Y | Y | Y | Y | transl_inter | na | NA | intergenic    | RP11-1033H12.3,PTGI  | ++     | pseudogene   | 44870;66664  | intergenic    | SH3RF1,NEK1           | -      | protein_cod   | 88738;33432   |
| 3021 | chr14 | 72962479  | + | chr4  | 60491838  | + | N | N | Y | N | N | transl_inter | na | NA | intronic;intr | RCGS6                | +      | protein_cod  | 0            | ncRNA_intr    | RP11-725D20.1         | -      | lincRNA       | 0             |
| 3022 | chr14 | 27118023  | + | chr5  | 151671608 | + | N | Y | Y | Y | N | transl_inter | na | NA | ncRNA_intr    | NOVA1-AS1            | +      | antisense    | 0            | intergenic    | CTB-12O2.1,NMUR2      | +-     | lincRNA,prc   | 21599;99485   |
| 3023 | chr14 | 50227806  | + | chr5  | 107791421 | + | N | N | Y | N | N | transl_inter | na | NA | intergenic    | KLHDC1,KLHDC2        | ++     | protein_cod  | 7936;6520    | intergenic    | FBXL17,RP11-120B7.1   | +-     | protein_cod   | 73622;137889  |
| 3024 | chr14 | 100492730 | + | chr5  | 88271357  | + | N | N | N | Y | N | transl_inter | na | NA | intronic      | EVL                  | +      | protein_cod  | 0            | ncRNA_intr    | MEF2C-AS1             | +      | antisense     | 0             |
| 3025 | chr14 | 44886653  | - | chr6  | 78646808  | - | N | N | Y | Y | N | transl_inter | na | NA | intergenic    | RP11-99L13.2,RP11-9  | +      | lincRNA,linc | 23734;27297  | intergenic    | SNORD112,RP3-390M24   | +      | snoRNA,linc   | 199820;467376 |
| 3026 | chr14 | 19036950  | - | chr6  | 68100064  | + | Y | Y | Y | Y | Y | transl_inter | na | NA | intergenic    | NONE,RP11-754I20.1   | NONE,+ | NONE,pseu    | NONE;73253   | intergenic    | SNORD65,RP11-409K15   | +      | snoRNA,ps     | 179691;66175  |
| 3027 | chr14 | 27117709  | + | chr6  | 168285635 | + | Y | Y | Y | Y | Y | transl_inter | na | NA | ncRNA_intr    | NOVA1-AS1            | +      | antisense    | 0            | intronic      | MLLT4                 | -      | protein_cod   | 0             |
| 3028 | chr14 | 77736064  | + | chr6  | 84266489  | - | N | N | Y | N | N | transl_inter | na | NA | intronic      | NGB                  | -      | protein_cod  | 0            | intronic      | SNAP91                | -      | protein_cod   | 0             |
| 3029 | chr14 | 77736106  | + | chr6  | 84266492  | - | N | Y | N | N | N | transl_inter | na | NA | intronic      | NGB                  | -      | protein_cod  | 0            | intronic      | SNAP91                | -      | protein_cod   | 0             |
| 3030 | chr14 | 49797015  | + | chr6  | 67073055  | + | N | N | N | Y | Y | transl_inter | na | NA | intergenic    | RP11-816J8.1,RP11-3; | +-     | lincRNA,ps   | 252792;43669 | intergenic    | AC002485.1,RP11-24C1  | +-     | miRNA,ps      | 3663;347080   |
| 3031 | chr14 | 77736123  | + | chr6  | 17094332  | + | Y | N | N | N | N | transl_inter | na | NA | intronic      | NGB                  | -      | protein_cod  | 0            | intergenic    | RP1-151F17.2,STMND1   | ++     | lincRNA,prc   | 327218;8157   |
| 3032 | chr14 | 100394236 | - | chr7  | 158387983 | - | N | N | N | Y | N | transl_inter | na | NA | intronic      | EML1                 | +      | protein_cod  | 0            | intergenic;ir | MIR5707,THAP5P1       | +-     | miRNA,ps      | 3595;27897    |
| 3033 | chr14 | 100394261 | - | chr7  | 158387983 | - | N | N | N | Y | N | transl_inter | na | NA | intronic      | EML1                 | +      | protein_cod  | 0            | intergenic;ir | MIR5707,THAP5P1       | +-     | miRNA,ps      | 3595;27897    |
| 3034 | chr14 | 100394294 | - | chr7  | 158387918 | - | Y | N | N | N | N | transl_inter | na | NA | intronic      | EML1                 | +      | protein_cod  | 0            | intergenic    | MIR5707,THAP5P1       | +-     | miRNA,ps      | 3530;27962    |
| 3035 | chr14 | 88065102  | - | chr7  | 156875689 | + | N | N | N | N | Y | transl_inter | na | NA | intergenic    | RP11-594C13.1,CTD-2  | +-     | lincRNA,linc | 25736;35621  | intergenic    | RP4-639J15.1,RP4-639J | -      | lincRNA,ps    | 24481;4960    |
| 3036 | chr14 | 90911815  | - | chr7  | 58017479  | + | Y | N | Y | Y | N | transl_inter | na | NA | intergenic;in | CALM1,RP11-1078H9.   | +-     | protein_cod  | 37210;6592   | intergenic    | RP11-548K12.12,NONE   | +,NONE | pseudogene    | 120727;NONE   |
| 3037 | chr14 | 102511700 | - | chr7  | 100938136 | + | Y | Y | Y | Y | Y | transl_inter | na | NA | ncRNA_intr    | RP11-1017G21.4       | +-     | antisense    | 0            | intergenic    | AZGP1P2,RP11-132A1.3  | -      | pseudogene    | 5084;4758     |
| 3038 | chr14 | 32719234  | + | chr7  | 153094150 | - | N | Y | N | N | Y | transl_inter | na | NA | intergenic    | RP11-134E15.1,RP11-  | +-     | pseudogene   | 6935;21827   | intergenic    | AC079809.2,AC073236.3 | -      | pseudogene    | 252477;2855   |
| 3039 | chr14 | 35128039  | + | chr7  | 109672933 | + | N | N | Y | N | Y | transl_inter | na | NA | intergenic    | SNX6,RNU6-1261P      | +-     | protein_cod  | 28650;17058  | intergenic    | RPL3P8,AC003088.1     | -      | pseudogene    | 233252;199363 |
| 3040 | chr14 | 37233279  | + | chr7  | 97688572  | + | Y | N | N | N | N | transl_inter | na | NA | intronic      | SLC25A21             | -      | protein_cod  | 0            | intergenic    | RN7SL13P,LMTK2        | +-     | misc_RNA,i    | 35284;47625   |
| 3041 | chr14 | 48030144  | + | chr7  | 87333191  | + | N | Y | N | Y | N | transl_inter | na | NA | intronic      | MDGA2,MDGA2          | -      | protein_cod  | 0            | intronic      | ABCB1,RUNDG3B         | +-     | protein_cod   | 0             |
| 3042 | chr14 | 70944697  | + | chr7  | 138786219 | + | Y | N | N | N | N | transl_inter | na | NA | ncRNA_intr    | RP11-486O13.4,ADA    | +-     | lincRNA,linc | 8971;9068    | intergenic;ir | AC022616.1,RP11-726G  | -      | protein_cod   | 0             |
| 3043 | chr14 | 36674745  | + | chr8  | 43226576  | + | Y | Y | Y | Y | Y | transl_inter | na | NA | intergenic;in | AL162511.1,RP11-259  | +-     | miRNA,lincf  | 8971;9068    | intergenic;ir | AC022616.1,RP11-726G  | +-     | miRNA,ps      | 4646;1126     |
| 3044 | chr14 | 36674745  | + | chr8  | 43226576  | + | Y | Y | Y | Y | Y | transl_inter | na | NA | intergenic;in | AL162511.1,RP11-259  | +-     | miRNA,lincf  | 8971;9068    | intergenic;ir | AC022616.1,RP11-726G  | +-     | miRNA,ps      | 4646;1126     |
| 3045 | chr14 | 90911815  | + | chr9  | 66836089  | - | Y | N | Y | N | N | transl_inter | na | NA | intergenic;in | CALM1,RP11-1078H9.   | +-     | protein_cod  | 37210;6592   | upstream      | RP11-318K12.3         | +      | pseudogene    | 0             |
| 3046 | chr14 | 77736144  | + | chr9  | 99002429  | - | N | Y | N | N | N | transl_inter | na | NA | intronic      | NGB                  | -      | protein_cod  | 0            | intronic      | HSD17B3               | -      | protein_cod   | 0             |
| 3047 | chr14 | 70692482  | + | chr9  | 13424341  | + | N | Y | N | N | N | transl_inter | na | NA | ncRNA_intr    | RP11-486O13.2        | +      | antisense    | 0            | ncRNA_intr    | RP11-536O18.2         | -      | lincRNA       | 0             |
| 3048 | chr14 | 94846039  | - | chrX  | 26049002  | - | N | Y | N | Y | Y | transl_inter | na | NA | intronic      | SERPINA1             | -      | protein_cod  | 0            | intergenic    | RP11-86A5.1,MAGEB18   | ++     | lincRNA,prc   | 138241;106558 |
| 3049 | chr14 | 94846161  | - | chrX  | 26050060  | - | N | Y | N | Y | N | transl_inter | na | NA | intronic      | SERPINA1             | -      | protein_cod  | 0            | intergenic    | RP11-86A5.1,MAGEB18   | ++     | lincRNA,prc   | 138399;106400 |
| 3050 | chr14 | 44886683  | - | chrX  | 77471136  | + | N | Y | N | N | N | transl_inter | na | NA | intergenic    | RP11-99L13.2,RP11-9  | +-     | lincRNA,linc | 23764;27267  | intergenic    | FND3C3P,CYSLTR1       | +-     | pseudogene    | 43217;55825   |
| 3051 | chr14 | 40882900  | + | chrX  | 21110230  | - | N | N | N | N | Y | transl_inter | na | NA | intergenic    | RP11-662J14.2,RP11-  | +-     | misc_RNA,i   | 24556;541203 | intergenic    | RN7SKP183,RNU6-133F   | +-     | misc_RNA,i    | 639681;122525 |
| 3052 | chr14 | 63420594  | + | chrY  | 18594207  | - | Y | Y | N | Y | Y | transl_inter | na | NA | intronic      | KCNH5                | -      | protein_cod  | 0            | intergenic    | RNU6-184P,SURF6P1     | +-     | snoRNA,ps     | 145938;710499 |
| 3053 | chr14 | 63420592  | + | chrY  | 18594227  | + | Y | Y | Y | Y | Y | transl_inter | na | NA | intronic      | KCNH5                | -      | protein_cod  | 0            | intergenic    | RNU6-184P,SURF6P1     | +-     | snoRNA,ps     | 145958;710479 |
| 3054 | chr15 | 20452666  | - | chr16 | 33406185  | + | N | N | N | N | Y | transl_inter | na | NA | ncRNA_intr    | RP11-492D6.3         | +      | pseudogene   | 3701;61406   | intergenic    | HERC2P5,RP11-67H24.1  | +      | pseudogene    | 31528;1832    |
| 3055 | chr15 | 20108513  | + | chr16 | 32819045  | - | N | N | N | N | Y | transl_inter | na | NA | intergenic    | RP11-173D3.3,IGHV1   | +-     | pseudogene   | 0            | intergenic    | RRN3P1,NPIP84         | -      | pseudogene    | 3406;10753    |
| 3056 | chr15 | 22412531  | + | chr16 | 21835137  | - | N | Y | Y | Y | N | transl_inter | na | NA | ncRNA_intr    | RP11-69H14.6         | +      | sense_over   | 0            | intergenic    | RP11-67H24.2,RP11-989 | +-     | lincRNA,ps    | 13668;7651    |
| 3057 | chr15 | 20618287  | + | chr16 | 32849634  | + | N | Y | N | N | N | transl_inter | na | NA | ncRNA_intr    | HERC2P3              | +      | pseudogene   | 0            | intergenic    | CTD-252A2.6,RPL32P3   | ++     | pseudogene    | 22081;4310    |
| 3058 | chr15 | 69257218  | - | chr17 | 78511693  | - | N | N | N | Y | N | transl_inter | na | NA | ncRNA_intr    | RP11-809H16.2        | +      | processed_   | 0            | intergenic    | CTD-252A2.6,RPL32P3   | ++     | pseudogene    | 22227;4164    |
| 3059 | chr15 | 69257899  | + | chr17 | 78511839  | + | N | Y | N | Y | Y | transl_inter | na | NA | ncRNA_intr    | RP11-809H16.2        | +      | processed_   | 0            | intergenic    | CTD-252A2.6,RPL32P3   | ++     | pseudogene    | 22227;4164    |
| 3060 | chr15 | 54939522  | - | chr18 | 23467619  | - | Y | N | N | N | Y | transl_inter | na | NA | intergenic    | UNC13C,RP11-548M1    | ++     | protein_cod  | 18716;409423 | intergenic    | RN7SL97P,RP11-737G2   | +-     | misc_RNA,i    | 69123;65561   |
| 3061 | chr15 | 83373435  | - | chr18 | 56311562  | + | N | N | N | N | Y | transl_inter | na | NA | intronic      | AP3B2                | -      | protein_cod  | 0            | intergenic    | RPL9P31,RP11-126O1.5  | +-     | pseudogene    | 12210;26150   |
| 3062 | chr15 | 26864829  | + | chr18 | 50612366  | - | N | Y | N | N | N | transl_inter | na | NA | intronic      | GABRB3               | -      | protein_cod  | 0            | intronic      | DCC                   | +      | protein_cod   | 0             |
| 3063 | chr15 | 52362742  | - | chr19 | 34441681  | - | N | Y | Y | Y | N | transl_inter | na | NA | ncRNA_intr    | CTD-2184D3.5         | -      | antisense    | 0            | intergenic    | RN7SL150P,RPS4XP23    | +      | misc_RNA,i    | 23151;70883   |
| 3064 | chr15 | 97418531  | - | chr19 | 54337092  | + | N | Y | N | N | N | transl_inter | na | NA | intergenic    | RN7SKP181,AC05587    | +-     | misc_RNA,i   | 32917;215961 | intergenic    | NLRP12,AC008753.6     | -      | protein_cod   | 9444;20743    |
| 3065 | chr15 | 12138798  | - | chr2  | 91273906  | - | N | Y | N | Y | N | transl_inter | na | NA | intergenic    | RP11-854K16.3,BMS1   | +-     | lincRNA,ps   | 3374;26836   | intergenic    | AC018696.5,AC018696.6 | -      | pseudogene    | 3990;6268     |
| 3066 | chr15 | 41323328  | - | chr2  | 207583    | - | N | N | N | N | Y | transl_inter | na | NA | intronic      | INO80                | -      | protein_cod  | 0            | intergenic    | AC079779.7,SH3Y1      | +-     | antisense,pi  | 1478;10553    |
| 3067 | chr15 | 40963887  | - | chr2  | 5628675   | + | N | Y | Y | Y | N | transl_inter | na | NA | intergenic    | CASC5,RAD51-AS1      | +-     | protein_cod  | 7347;15035   | intergenic    | AC073143.1,AC107057.1 | +-     | pseudogene    | 174408;61237  |
| 3068 | chr15 | 52362717  | + | chr2  | 24843628  | - | N | Y | Y | Y | N | transl_inter | na | NA | ncRNA_intr    | CTD-2184D3.5         | -      | antisense    | 0            | intronic      | NCOA1                 | +      | protein_cod   | 0             |
| 3069 | chr15 | 89213025  | + | chr2  | 84728529  | - | N | N | N | Y | N | transl_inter | na | NA | intergenic    | ISG20,RP11-343B18.2  | +-     | protein_cod  | 13311;127619 | intergenic    | SUCLG1,DNAH6          | +      | protein_cod   | 41925;15050   |
| 3070 | chr15 | 89213491  | + | chr2  | 84728617  | - | N | N | N | N | Y | transl_inter | na | NA | intergenic    | ISG20,RP11-343B18.2  | +-     | protein_cod  | 13777;127153 | intergenic    | SUCLG1,DNAH6          | +      | protein_cod   | 42013;14962   |
| 3071 | chr15 | 101250531 | + | chr20 | 62325194  | + | N | N | Y | N | N | transl_inter | na | NA | intergenic    | ASB7,RP11-66B24.5    | ++     | protein_cod  | 58621;5923   | intronic      | RTEL1-TNFRSF6B,RTEL   | +-     | protein_cod   | 0             |
| 3072 | chr15 | 101250497 | + | chr20 | 62324912  | - | N | N | Y | N | N | transl_inter | na | NA | intergenic    | ASB7,RP11-66B24.5    | ++     | protein_cod  | 58587;5957   | intronic      | RTEL1-TNFRSF6B,RTEL   | +-     | protein_cod   | 0             |
| 3073 | chr15 | 20148812  | + | chr22 | 17392952  | - | Y | Y | N | N | N | transl_inter | na | NA | intergenic    | RP11-173D3.3,IGHV1   | +-     | pseudogene   | 44000;21107  | intergenic    | IGKV10R22.5,IGKV20R   | +-     | IG_V_pseu     | 7366;2173     |
| 3074 | chr15 | 23707592  | + | chr22 | 42798895  | + | Y | N | N | Y | Y | transl_inter | na | NA | intergenic    | CHLGA6L2,MIR4508     | -      | protein_cod  | 15211;99617  | intronic      | NFAM1                 | -      | protein_cod   | 0             |
| 3075 | chr15 | 78892114  | + | chr22 | 31416887  | + | Y | Y | Y | Y | Y | transl_inter | na | NA | intronic      | CHRNA3               | -      | protein_cod  | 0            | intergenic    | TUG1,RN7SL633P        | +-     | antisense,rr  | 41506;39088   |
| 3076 | chr15 | 84364017  | + | chr22 | 50777759  | + | N | Y | N | N | N | transl_inter | na | NA | intronic      | ADAMTSL3             | +      | protein_cod  | 0            | intergenic    | DENNDD6B,PPP6R2       | +-     | protein_cod   | 12270;3974    |
| 3077 | chr15 | 84364027  | + | chr22 | 50776291  | + | N | Y | N | N | N | transl_inter | na | NA | intronic      | ADAMTSL3             | +      | protein_cod  | 0            | intergenic    | DENNDD6B,PPP          |        |               |               |

|      |       |          |   |       |           |   |   |   |   |   |   |              |    |    |               |                      |        |             |              |               |                      |                       |        |              |              |               |
|------|-------|----------|---|-------|-----------|---|---|---|---|---|---|--------------|----|----|---------------|----------------------|--------|-------------|--------------|---------------|----------------------|-----------------------|--------|--------------|--------------|---------------|
| 3103 | chr15 | 61363571 | + | chr9  | 137114639 | - | N | Y | N | N | N | transl_inter | na | NA | intronic      | RORA                 | -      | protein_cod | 0            | intergenic;ir | LL09NC01-139C3.1,RP1 | +                     | +      | lincRNA,linc | 80177;71138  |               |
| 3104 | chr15 | 61363607 | + | chr9  | 137114639 | - | N | N | N | N | Y | transl_inter | na | NA | intronic      | RORA                 | -      | protein_cod | 0            | intergenic;ir | LL09NC01-139C3.1,RP1 | +                     | +      | lincRNA,linc | 80177;71138  |               |
| 3105 | chr15 | 86440164 | + | chr9  | 74036144  | - | N | N | N | N | Y | transl_inter | na | NA | intronic      | MIR548AP,RP11-23A2   | +      | +           | miRNA,pse    | 71203;61784   | intronic             | TRPM3                 | +      | +            | protein_cod  | 0             |
| 3106 | chr15 | 75867612 | + | chr9  | 115151079 | + | N | Y | N | N | Y | transl_inter | na | NA | ncRNA_intr    | CTD-2323K18.1        | -      | processed_  | 0            | intronic      | HSDL2                | +                     | +      | protein_cod  | 0            |               |
| 3107 | chr15 | 24871846 | - | chrX  | 147336144 | - | Y | N | N | N | Y | transl_inter | na | NA | ncRNA_intr    | PWNR1                | +      | lincRNA     | 0            | intergenic    | U40455.1,RPL7L1P11   | +                     | +      | protein_cod  | 55746;210084 |               |
| 3108 | chr15 | 24871859 | - | chrX  | 147336170 | - | N | N | N | N | Y | transl_inter | na | NA | ncRNA_intr    | PWNR1                | +      | lincRNA     | 0            | intergenic    | U40455.1,RPL7L1P11   | +                     | +      | pseudogen    | 55772;210058 |               |
| 3109 | chr15 | 24871861 | - | chrX  | 147336567 | - | N | N | Y | N | N | transl_inter | na | NA | ncRNA_intr    | PWNR1                | +      | lincRNA     | 0            | intergenic    | U40455.1,RPL7L1P11   | +                     | +      | pseudogen    | 56169;209661 |               |
| 3110 | chr16 | 88624311 | + | chr17 | 7232303   | + | N | Y | Y | Y | Y | transl_inter | na | NA | intergenic    | ZFPM1,ZC3H18         | +      | +           | protein_cod  | 20887;12478   | upstream             | NEURL4,AC026954.6     | +      | +            | protein_cod  | 0             |
| 3111 | chr16 | 88943425 | + | chr17 | 7683145   | - | N | Y | Y | Y | Y | transl_inter | na | NA | exonic        | CBFA2T3              | +      | +           | protein_cod  | 0             | intronic             | DNAH2                 | +      | +            | protein_cod  | 0             |
| 3112 | chr16 | 33852728 | + | chr17 | 25289488  | + | N | Y | N | N | N | transl_inter | na | NA | ncRNA_intr    | RP11-598D12.2        | +      | +           | pseudogen    | 0             | intergenic           | NONE,RP11-260A9.1     | NONE,+ | NONE,+       | pseudogen    | NONE;19232    |
| 3113 | chr16 | 34178197 | + | chr17 | 25281298  | + | Y | Y | N | N | N | transl_inter | na | NA | intergenic    | RNA5-8SP2,CTD-2144   | +      | +           | rRNA,lincR   | 212620;34918  | intergenic           | NONE,RP11-260A9.1     | NONE,+ | NONE,+       | pseudogen    | NONE;27422    |
| 3114 | chr16 | 33041116 | - | chr18 | 15165808  | - | N | Y | N | N | Y | transl_inter | na | NA | intergenic;in | RP11-19N8.2,RP11-19  | +      | +           | pseudogen    | 1758;13814    | intergenic           | RP11-805F19.1,RP11-45 | +      | +            | lincRNA,pse  | 1342;31190    |
| 3115 | chr16 | 33041116 | - | chr18 | 15166384  | - | N | Y | N | N | N | transl_inter | na | NA | intergenic;in | RP11-19N8.2,RP11-19  | +      | +           | pseudogen    | 1758;13814    | intergenic           | RP11-805F19.1,RP11-45 | +      | +            | lincRNA,pse  | 1918;30614    |
| 3116 | chr16 | 81084831 | + | chr19 | 7820332   | + | N | N | Y | N | Y | transl_inter | na | NA | intergenic    | ATMIN,C16orf46       | +      | +           | protein_cod  | 3868;2271     | intergenic           | RPL2P129,CLEC4M       | +      | +            | pseudogen    | 4285;7703     |
| 3117 | chr16 | 33853339 | + | chr19 | 33444599  | - | N | Y | Y | Y | Y | transl_inter | na | NA | ncRNA_intr    | RP11-598D12.2        | +      | +           | pseudogen    | 0             | exonic;exon          | CEP89                 | -      | -            | protein_cod  | 0             |
| 3118 | chr16 | 49885315 | + | chr19 | 17870049  | + | Y | Y | N | Y | Y | transl_inter | na | NA | intronic      | ZNF423               | +      | +           | protein_cod  | 0             | intronic             | FCHO1                 | +      | +            | protein_cod  | 0             |
| 3119 | chr16 | 19251826 | - | chr2  | 208963272 | - | N | Y | N | N | Y | transl_inter | na | NA | intronic      | SYT17                | +      | +           | protein_cod  | 0             | intergenic           | snoU13,CRYGEP         | +      | +            | snoRNA,pse   | 24386;9685    |
| 3120 | chr16 | 19251865 | - | chr2  | 208963273 | - | N | N | N | Y | N | transl_inter | na | NA | intronic      | SYT17                | +      | +           | protein_cod  | 0             | intergenic           | snoU13,CRYGEP         | +      | +            | snoRNA,pse   | 24387;9684    |
| 3121 | chr16 | 19263768 | - | chr2  | 137698271 | - | Y | N | N | Y | N | transl_inter | na | NA | intronic      | SYT17                | +      | +           | protein_cod  | 0             | intronic             | THSD7B                | +      | +            | protein_cod  | 0             |
| 3122 | chr16 | 46443644 | - | chr2  | 89642368  | - | N | N | Y | N | Y | transl_inter | na | NA | intergenic    | NONE,ANKRD26P1       | NONE,- | NONE,psu    | 0            | intergenic    | IGKV2-40,IGKV2D-40   | +                     | +      | IG_V_gene,   | 212182;48233 |               |
| 3123 | chr16 | 33961395 | - | chr2  | 133014882 | + | N | N | N | Y | N | transl_inter | na | NA | ncRNA_exo     | LINC000273           | +      | +           | lincRNA      | 0             | upstream             | MIR663B               | +      | +            | miRNA        | 0             |
| 3124 | chr16 | 33964526 | - | chr2  | 133011773 | + | Y | N | N | N | N | transl_inter | na | NA | upstream      | RNA5-8SP2            | +      | +           | rRNA         | 0             | upstream             | RNA5-8SP5             | +      | +            | rRNA         | 0             |
| 3125 | chr16 | 33970816 | - | chr2  | 133007551 | + | N | N | N | Y | Y | transl_inter | na | NA | intergenic    | RNA5-8SP2,CTD-2144   | +      | +           | rRNA,lincR   | 5239;242299   | intergenic           | ANKRD30BL,RNA5-8SP1   | +      | +            | protein_cod  | 88023;3176    |
| 3126 | chr16 | 19263648 | + | chr2  | 204407328 | - | Y | Y | N | Y | N | transl_inter | na | NA | intronic      | SYT17                | +      | +           | protein_cod  | 0             | intergenic           | RAPH1,AC125238.2      | +      | +            | protein_cod  | 7195;91972    |
| 3127 | chr16 | 33953538 | + | chr2  | 133029738 | - | N | N | N | Y | N | transl_inter | na | NA | intergenic    | AC136932.2,LINC00027 | +      | +           | miRNA,lincf  | 7517;7514     | intergenic           | CDC27P1,AC097532.2    | +      | +            | pseudogen    | 9123;13630    |
| 3128 | chr16 | 33958399 | + | chr2  | 133025115 | - | N | N | N | Y | N | transl_inter | na | NA | intergenic    | AC136932.2,LINC00027 | +      | +           | miRNA,lincf  | 12378;2653    | intergenic           | CDC27P1,AC097532.2    | +      | +            | pseudogen    | 4500;18253    |
| 3129 | chr16 | 33964365 | + | chr2  | 133011830 | - | Y | N | N | N | Y | transl_inter | na | NA | intergenic    | LINC000273,RNA5-8SF  | +      | +           | lincRNA,rR   | 1862;1061     | upstream             | RNA5-8SP5             | +      | +            | rRNA         | 0             |
| 3130 | chr16 | 33966412 | + | chr2  | 133009499 | - | N | N | N | N | Y | transl_inter | na | NA | downstream    | RNA5-8SP2            | +      | +           | rRNA         | 0             | downstream           | RNA5-8SP5             | +      | +            | rRNA         | 0             |
| 3131 | chr16 | 46477706 | + | chr2  | 91980978  | - | N | N | N | Y | Y | transl_inter | na | NA | intergenic    | NONE,ANKRD26P1       | NONE,- | NONE,psu    | 0            | intergenic    | GGT8P,IGKV10R-1      | +                     | +      | pseudogen    | 11783;24819  |               |
| 3132 | chr16 | 33970145 | + | chr2  | 76668102  | + | Y | N | Y | N | N | transl_inter | na | NA | intergenic    | RNA5-8SP2,CTD-2144   | +      | +           | rRNA,lincR   | 4568;242970   | intergenic           | RP11-335E8.1,RN7SKP2  | +      | +            | pseudogen    | 179315;4103   |
| 3133 | chr16 | 33961192 | - | chr20 | 26189321  | + | Y | N | N | N | N | transl_inter | na | NA | ncRNA_exo     | LINC000273           | +      | +           | lincRNA      | 0             | ncRNA_intr           | MIR663A               | +      | +            | processed_   | 0             |
| 3134 | chr16 | 32419921 | + | chr21 | 17311988  | + | N | N | N | N | Y | transl_inter | na | NA | ncRNA_intr    | RP11-626K17.5        | +      | +           | pseudogen    | 0             | intergenic           | USP25,RNU6-426P       | +      | +            | protein_cod  | 59611;95745   |
| 3135 | chr16 | 10924342 | + | chr22 | 23852644  | - | N | N | N | Y | N | transl_inter | na | NA | intergenic    | TPV23A,RP11-876N24   | +      | +           | protein_cod  | 11700;9899    | intergenic           | AP000345.1,AP000345.4 | +      | +            | lincRNA,linc | 23477;2037    |
| 3136 | chr16 | 32823660 | + | chr22 | 16867653  | - | N | N | Y | N | N | transl_inter | na | NA | ncRNA_intr    | RP11-67H24.2         | +      | +           | lincRNA      | 0             | upstream             | ABCD1P4               | +      | +            | pseudogen    | 0             |
| 3137 | chr16 | 32127303 | + | chr22 | 16867402  | + | Y | N | N | N | N | transl_inter | na | NA | ncRNA_intr    | HERC2P4              | +      | +           | pseudogen    | 0             | intergenic           | LA16c-13E4.3,ABCD1P4  | +      | +            | pseudogen    | 180157;1018   |
| 3138 | chr16 | 32127401 | + | chr22 | 16867611  | + | N | N | Y | N | N | transl_inter | na | NA | ncRNA_intr    | HERC2P4              | +      | +           | pseudogen    | 0             | upstream             | ABCD1P4               | +      | +            | pseudogen    | 0             |
| 3139 | chr16 | 32127752 | + | chr22 | 16867332  | + | N | N | N | Y | N | transl_inter | na | NA | ncRNA_intr    | HERC2P4              | +      | +           | pseudogen    | 0             | intergenic           | LA16c-13E4.3,ABCD1P4  | +      | +            | pseudogen    | 180087;1088   |
| 3140 | chr16 | 32127861 | + | chr22 | 16867394  | + | N | N | N | N | Y | transl_inter | na | NA | ncRNA_intr    | HERC2P4              | +      | +           | pseudogen    | 0             | intergenic           | LA16c-13E4.3,ABCD1P4  | +      | +            | pseudogen    | 180149;1026   |
| 3141 | chr16 | 46500066 | + | chr22 | 16850167  | + | Y | N | N | Y | N | transl_inter | na | NA | intergenic    | NONE,ANKRD26P1       | NONE,- | NONE,psu    | 0            | intergenic    | LA16c-13E4.3,ABCD1P4 | +                     | +      | pseudogen    | 162922;18253 |               |
| 3142 | chr16 | 87256635 | + | chr22 | 45380071  | + | N | N | Y | N | N | transl_inter | na | NA | ncRNA_intr    | RP11-899L11.1        | +      | +           | lincRNA      | 0             | intronic             | PHF21B                | +      | +            | protein_cod  | 0             |
| 3143 | chr16 | 19332992 | - | chr3  | 25939094  | - | Y | Y | N | Y | Y | transl_inter | na | NA | intronic      | CLEC19A              | +      | +           | protein_cod  | 0             | intergenic           | LINC00692,RPEP2       | +      | +            | protein_cod  | 23905;118066  |
| 3144 | chr16 | 64394116 | - | chr4  | 181791411 | - | N | Y | N | N | N | transl_inter | na | NA | ncRNA_intr    | AC012322.1           | +      | +           | lincRNA      | 0             | intergenic           | RP11-460H9.1,LINC0029 | +      | +            | lincRNA,linc | 111220;193831 |
| 3145 | chr16 | 22092926 | - | chr4  | 7949654   | - | Y | Y | Y | Y | Y | transl_inter | na | NA | UTR3          | C16orf52             | +      | +           | protein_cod  | 0             | intergenic           | AC097381.1,ABLIM2     | +      | +            | protein_cod  | 7632;17385    |
| 3146 | chr16 | 27952974 | - | chr5  | 17484958  | - | N | N | N | Y | N | transl_inter | na | NA | intronic      | GSG1L                | +      | +           | snoU13,SFXN1 | 0             | intergenic           | KRT18P16,HMGBP1P29    | +      | +            | snoRNA,prc   | 7037;19107    |
| 3147 | chr16 | 33992443 | + | chr5  | 123269399 | + | N | N | N | Y | N | transl_inter | na | NA | intergenic    | RNA5-8SP2,CTD-2144   | +      | +           | rRNA,lincR   | 26866;220672  | intergenic           | FABP5P6,snoU13        | +      | +            | pseudogen    | 296302;286873 |
| 3148 | chr16 | 34229729 | + | chr5  | 118935405 | + | N | Y | N | N | N | transl_inter | na | NA | intergenic    | CTD-2144E22.8,AC13   | +      | +           | lincRNA,pse  | 15514;2377    | intergenic           | RP11-347L18.1,RP11-30 | +      | +            | pseudogen    | 44052;10492   |
| 3149 | chr16 | 62522384 | - | chr6  | 165196148 | - | Y | Y | N | N | Y | transl_inter | na | NA | intergenic    | snoU13,AC009110.1    | +      | +           | snoRNA,linc  | 84126;107892  | intergenic           | RP3-416J7.5,DUSP22    | +      | +            | lincRNA,linc | 426471;45091  |
| 3150 | chr16 | 33327322 | - | chr6  | 256765    | + | Y | Y | N | N | N | transl_inter | na | NA | intronic      | TP53TG3C             | +      | +           | protein_cod  | 0             | intergenic           | RP1-40E16.9,TUBB2B    | +      | +            | lincRNA,prc  | 50373;34865   |
| 3151 | chr16 | 86498129 | - | chr6  | 3222645   | + | Y | N | N | N | N | transl_inter | na | NA | intergenic    | RP11-158I3.1,FENDR   | +      | +           | pseudogen    | 28639;10006   | intergenic           | RP11-428J1.2          | +      | +            | pseudogen    | 26655;1850    |
| 3152 | chr16 | 13037188 | + | chr6  | 4979236   | - | N | N | N | Y | N | transl_inter | na | NA | intronic      | SHISA9               | +      | +           | protein_cod  | 0             | upstream             | DUSP22,IRF4           | +      | +            | protein_cod  | 31105;9279    |
| 3153 | chr16 | 33428529 | + | chr6  | 382460    | - | Y | Y | Y | Y | Y | transl_inter | na | NA | intergenic    | RP11-293B20.2,BMS1   | +      | +           | pseudogen    | 3518;60963    | intergenic           | RP3-399J4.1,CYCSP17   | +      | +            | pseudogen    | 523558;271603 |
| 3154 | chr16 | 33480458 | + | chr6  | 95680455  | - | Y | N | Y | N | Y | transl_inter | na | NA | intergenic    | RP11-293B20.2,BMS1   | +      | +           | pseudogen    | 55447;9034    | intergenic           | NONE,RP11-715L17.1    | NONE,+ | NONE,+       | pseudogen    | NONE;743136   |
| 3155 | chr16 | 33522631 | - | chr7  | 61078733  | - | N | N | N | Y | N | transl_inter | na | NA | intergenic    | BMS1P8,ENPP7P13      | +      | +           | pseudogen    | 21704;49213   | intergenic           | NONE,RP11-715L17.1    | NONE,+ | NONE,+       | pseudogen    | NONE;743136   |
| 3156 | chr16 | 33522675 | - | chr7  | 61078731  | - | Y | N | N | N | N | transl_inter | na | NA | intergenic    | BMS1P8,ENPP7P13      | +      | +           | pseudogen    | 0             | downstream           | RP11-715L17.1         | +      | +            | pseudogen    | 0             |
| 3157 | chr16 | 33854185 | - | chr7  | 61822573  | - | N | N | N | Y | N | transl_inter | na | NA | downstream    | RP11-598D12.2        | NONE,- | NONE,psu    | 0            | intergenic    | NONE,RP11-715L17.1   | NONE,+                | NONE,+ | pseudogen    | NONE;77209   |               |
| 3158 | chr16 | 46437163 | - | chr7  | 61744680  | - | N | Y | N | N | N | transl_inter | na | NA | intergenic    | NONE,ANKRD26P1       | NONE,- | NONE,psu    | 0            | intergenic    | INSIG1,BLACE         | +                     | +      | protein_cod  | 8316;39419   |               |
| 3159 | chr16 | 88365209 | - | chr7  | 155110261 | - | N | N | Y | N | N | transl_inter | na | NA | intergenic    | LA16c-44AG7.1,ZNF46  | +      | +           | lincRNA,pro  | 29092;128670  | intergenic           | RP11-715L17.1         | +      | +            | pseudogen    | 0             |
| 3160 | chr16 | 33038386 | - | chr7  | 61822454  | + | N | N | N | Y | N | transl_inter | na | NA | ncRNA_intr    | RP11-19N8.2          |        |             |              |               |                      |                       |        |              |              |               |

|      |       |          |   |       |           |   |   |   |   |   |   |              |    |    |                          |                       |            |              |               |               |                       |             |              |              |
|------|-------|----------|---|-------|-----------|---|---|---|---|---|---|--------------|----|----|--------------------------|-----------------------|------------|--------------|---------------|---------------|-----------------------|-------------|--------------|--------------|
| 3187 | chr16 | 33949118 | - | chrY  | 10016004  | - | N | N | N | N | Y | transl_inter | na | NA | intergenic               | AC136932.2.LINC0027   | -,-        | miRNA,lincf  | 3097;11934    | intergenic    | PCMTD1P1.CDC27P2      | +,+         | pseudogene   | 4188;11982   |
| 3188 | chr16 | 33950510 | - | chrY  | 10017060  | - | N | N | Y | N | N | transl_inter | na | NA | intergenic               | AC136932.2.LINC0027   | -,-        | miRNA,lincf  | 4489;10542    | intergenic    | PCMTD1P1.CDC27P2      | +,+         | pseudogene   | 5244;10926   |
| 3189 | chr16 | 33950511 | - | chrY  | 10017572  | - | N | N | N | N | Y | transl_inter | na | NA | intergenic               | AC136932.2.LINC0027   | -,-        | miRNA,lincf  | 4490;10541    | intergenic    | PCMTD1P1.CDC27P2      | +,+         | pseudogene   | 5756;10414   |
| 3190 | chr16 | 33950541 | - | chrY  | 10017107  | - | N | N | N | Y | N | transl_inter | na | NA | intergenic               | AC136932.2.LINC0027   | -,-        | miRNA,lincf  | 4520;10511    | intergenic    | PCMTD1P1.CDC27P2      | +,+         | pseudogene   | 5291;10879   |
| 3191 | chr16 | 33950602 | - | chrY  | 10017055  | - | N | N | N | N | Y | transl_inter | na | NA | intergenic               | AC136932.2.LINC0027   | -,-        | miRNA,lincf  | 4581;10450    | intergenic    | PCMTD1P1.CDC27P2      | +,+         | pseudogene   | 5239;10931   |
| 3192 | chr16 | 33950675 | - | chrY  | 10017099  | - | N | N | N | N | N | transl_inter | na | NA | intergenic               | AC136932.2.LINC0027   | -,-        | miRNA,lincf  | 4654;10377    | intergenic    | PCMTD1P1.CDC27P2      | +,+         | pseudogene   | 5283;10887   |
| 3193 | chr16 | 33953116 | - | chrY  | 10019602  | - | N | N | N | Y | N | transl_inter | na | NA | intergenic               | AC136932.2.LINC0027   | -,-        | miRNA,lincf  | 7095;7936     | intergenic    | PCMTD1P1.CDC27P2      | +,+         | pseudogene   | 7786;8384    |
| 3194 | chr16 | 33953161 | - | chrY  | 10019557  | - | N | N | N | Y | N | transl_inter | na | NA | intergenic               | AC136932.2.LINC0027   | -,-        | miRNA,lincf  | 7140;7891     | intergenic    | PCMTD1P1.CDC27P2      | +,+         | pseudogene   | 7741;8429    |
| 3195 | chr16 | 33954658 | - | chrY  | 10021427  | - | N | N | Y | N | N | transl_inter | na | NA | intergenic               | AC136932.2.LINC0027   | -,-        | miRNA,lincf  | 8637;6394     | intergenic    | PCMTD1P1.CDC27P2      | +,+         | pseudogene   | 9611;6559    |
| 3196 | chr16 | 33961219 | - | chrY  | 10033630  | - | Y | Y | Y | Y | N | transl_inter | na | NA | ncRNA_exo.LINC00273      | -                     | lincRNA    | 0            | upstream      | AC010970.1    | -                     | miRNA       | 0            |              |
| 3197 | chr16 | 33964336 | - | chrY  | 10036688  | - | Y | N | N | N | N | transl_inter | na | NA | intergenic               | LINC00273.RNA5-8SF    | +,+        | lincRNA,rR   | 1833;1090     | ncRNA_exo     | AC010970.2            | -           | pseudogene   | 0            |
| 3198 | chr16 | 33964358 | - | chrY  | 10036710  | - | N | Y | Y | N | N | transl_inter | na | NA | intergenic               | LINC00273.RNA5-8SF    | +,+        | lincRNA,rR   | 1855;1068     | ncRNA_exo     | AC010970.2            | -           | pseudogene   | 0            |
| 3199 | chr16 | 33965511 | - | chrY  | 10037976  | - | Y | N | N | N | N | transl_inter | na | NA | ncRNA_exo.RNA5-8SP2      | -                     | rRNA       | 0            | downstream    | RNA5-8SP6     | -                     | rRNA        | 0            |              |
| 3200 | chr16 | 33965786 | - | chrY  | 10038130  | - | N | N | Y | N | N | transl_inter | na | NA | downstream               | RNA5-8SP2             | +          | rRNA         | 0             | downstream    | RNA5-8SP6             | +           | rRNA         | 0            |
| 3201 | chr16 | 34508166 | - | chrY  | 14479141  | - | Y | Y | N | Y | N | transl_inter | na | NA | ncRNA_intr.RP11-488I20.8 | +                     | lincRNA    | 0            | ncRNA_intr    | GYG2P1.ARSDP1 | +,+                   | pseudogene  | 0            |              |
| 3202 | chr16 | 34508308 | - | chrY  | 14479326  | - | N | N | N | Y | N | transl_inter | na | NA | ncRNA_intr.RP11-488I20.8 | +                     | lincRNA    | 0            | ncRNA_intr    | GYG2P1.ARSDP1 | +,+                   | pseudogene  | 0            |              |
| 3203 | chr16 | 34508332 | - | chrY  | 14479350  | - | N | N | Y | N | N | transl_inter | na | NA | ncRNA_intr.RP11-488I20.8 | +                     | lincRNA    | 0            | ncRNA_intr    | GYG2P1.ARSDP1 | +,+                   | pseudogene  | 0            |              |
| 3204 | chr16 | 35135870 | - | chrY  | 14482278  | - | Y | Y | Y | Y | Y | transl_inter | na | NA | upstream                 | AC116553.1            | +          | miRNA        | 0             | ncRNA_intr    | GYG2P1.ARSDP1         | +,+         | pseudogene   | 0            |
| 3205 | chr16 | 33901117 | + | chrY  | 13451808  | + | N | N | N | N | Y | transl_inter | na | NA | intergenic               | RP11-598D12.2.CTD-2   | +,+        | pseudogene   | 47289;21820   | intergenic    | AC134878.1.DUX4L16    | +,+         | miRNA,psel   | 111175;10786 |
| 3206 | chr16 | 33901117 | + | chrY  | 13451832  | + | Y | N | N | N | N | transl_inter | na | NA | intergenic               | RP11-598D12.2.CTD-2   | +,+        | pseudogene   | 47289;21820   | intergenic    | AC134878.1.DUX4L16    | +,+         | miRNA,psel   | 111199;10762 |
| 3207 | chr16 | 33950513 | + | chrY  | 10017313  | + | Y | N | Y | Y | Y | transl_inter | na | NA | intergenic               | AC136932.2.LINC0027   | -,-        | miRNA,lincf  | 4492;10539    | intergenic    | PCMTD1P1.CDC27P2      | +,+         | pseudogene   | 5497;10673   |
| 3208 | chr16 | 33989847 | + | chrY  | 10065417  | + | N | N | N | N | Y | transl_inter | na | NA | intergenic               | RNA5-8SP2.CTD-2144    | +,+        | rRNA,lincR   | 33270;214268  | intergenic    | RNA5-8SP6.NONE        | +,NONE      | rRNA,NONE    | 27502;NONE   |
| 3209 | chr17 | 25279199 | - | chr18 | 15208546  | + | N | N | N | N | Y | transl_inter | na | NA | intergenic               | NONE.RP11-260A9.1     | NONE,+     | NONE,psu     | NONE;29521    | intergenic    | RP11-454P7.3.BNIP3P3  | -,-         | pseudogene   | 10772;38882  |
| 3210 | chr17 | 25279359 | - | chr18 | 15208650  | + | N | N | N | Y | N | transl_inter | na | NA | intergenic               | NONE.RP11-260A9.1     | NONE,+     | NONE,psu     | NONE;29361    | intergenic    | RP11-454P7.3.BNIP3P3  | -,-         | pseudogene   | 10876;38778  |
| 3211 | chr17 | 25290257 | - | chr18 | 15197856  | + | Y | N | Y | Y | N | transl_inter | na | NA | intergenic               | NONE.RP11-260A9.1     | NONE,+     | NONE,psu     | NONE;18463    | upstream      | RP11-454P7.3          | -,-         | pseudogene   | 0            |
| 3212 | chr17 | 40846523 | - | chr18 | 3111053   | + | N | N | Y | N | Y | transl_inter | na | NA | ncRNA_intr.CTD-319K9.3   | -                     | antisense  | 0            | intronic      | MYOM1         | -                     | protein_cod | 0            |              |
| 3213 | chr17 | 25279199 | + | chr18 | 15208572  | - | N | N | N | Y | N | transl_inter | na | NA | intergenic               | NONE.RP11-260A9.1     | NONE,+     | NONE,psu     | NONE;29521    | intergenic    | RP11-454P7.3.BNIP3P3  | -,-         | pseudogene   | 10798;38856  |
| 3214 | chr17 | 25279333 | + | chr18 | 15208858  | - | N | Y | N | N | N | transl_inter | na | NA | intergenic               | NONE.RP11-260A9.1     | NONE,+     | NONE,psu     | NONE;29387    | intergenic    | RP11-454P7.3.BNIP3P3  | -,-         | pseudogene   | 11084;38570  |
| 3215 | chr17 | 25279358 | + | chr18 | 15208713  | - | Y | N | N | Y | N | transl_inter | na | NA | intergenic               | NONE.RP11-260A9.1     | NONE,+     | NONE,psu     | NONE;29362    | intergenic    | RP11-454P7.3.BNIP3P3  | -,-         | pseudogene   | 10939;38715  |
| 3216 | chr17 | 25282476 | + | chr18 | 15205218  | - | N | N | N | N | Y | transl_inter | na | NA | intergenic               | NONE.RP11-260A9.1     | NONE,+     | NONE,psu     | NONE;26244    | intergenic    | RP11-454P7.3.BNIP3P3  | -,-         | pseudogene   | 7444;42210   |
| 3217 | chr17 | 25289931 | + | chr18 | 15198276  | - | N | N | N | Y | N | transl_inter | na | NA | intergenic               | NONE.RP11-260A9.1     | NONE,+     | NONE,psu     | NONE;18789    | upstream      | RP11-454P7.3          | -           | pseudogene   | 0            |
| 3218 | chr17 | 25289998 | + | chr18 | 15197896  | - | N | N | Y | N | N | transl_inter | na | NA | intergenic               | NONE.RP11-260A9.1     | NONE,+     | NONE,psu     | NONE;18722    | upstream      | RP11-454P7.3          | -           | pseudogene   | 0            |
| 3219 | chr17 | 81194938 | - | chr19 | 59118540  | - | N | N | Y | N | N | transl_inter | na | NA | intergenic               | AC139099.3.NONE       | +,NONE     | pseudogene   | 6365;NONE     | intergenic    | CENPBD1P1.NONE        | +,NONE      | pseudogene   | 7372;NONE    |
| 3220 | chr17 | 81195449 | - | chr19 | 59118920  | - | Y | N | N | N | N | transl_inter | na | NA | intergenic               | AC139099.3.NONE       | +,NONE     | pseudogene   | 6876;NONE     | intergenic    | CENPBD1P1.NONE        | +,NONE      | pseudogene   | 7752;NONE    |
| 3221 | chr17 | 4972484  | + | chr19 | 53676640  | + | N | N | N | Y | Y | transl_inter | na | NA | intergenic               | RP11-46I8.1.RP11-46I1 | +,+        | pseudogene   | 7066;6489     | intronic      | ZNF665                | -           | protein_cod  | 0            |
| 3222 | chr17 | 4972527  | + | chr19 | 53676676  | + | N | N | Y | N | Y | transl_inter | na | NA | intergenic               | RP11-46I8.1.RP11-46I1 | +,+        | pseudogene   | 7109;6446     | intronic      | ZNF665                | -           | protein_cod  | 0            |
| 3223 | chr17 | 51286189 | - | chr2  | 195227034 | - | N | N | N | Y | Y | transl_inter | na | NA | intergenic               | RP11-750B16.1.RP11-1  | +,+        | pseudogene   | 102470;144599 | ncRNA_intr    | AC018799.1            | -           | lincRNA      | 0            |
| 3224 | chr17 | 74377420 | - | chr2  | 153997626 | - | N | Y | Y | Y | N | transl_inter | na | NA | intronic                 | PRPSA1.SPHK1          | +,+        | protein_cod  | 0             | intergenic    | UBQLN4P2.ATP5F1P4     | +,+         | pseudogene   | 263345;17826 |
| 3225 | chr17 | 25290221 | - | chr2  | 132795565 | + | Y | Y | Y | Y | N | transl_inter | na | NA | intergenic               | NONE.RP11-260A9.1     | NONE,+     | NONE,psu     | NONE;18499    | ncRNA_exo     | AC09387.1             | -           | pseudogene   | 0            |
| 3226 | chr17 | 19995620 | + | chr2  | 209033721 | - | Y | Y | Y | Y | N | transl_inter | na | NA | intronic                 | intrac.SPECC1         | +          | protein_cod  | 0             | intronic      | intrac.C2orf80        | -           | protein_cod  | 0            |
| 3227 | chr17 | 28863967 | + | chr2  | 25857285  | - | N | N | N | Y | N | transl_inter | na | NA | ncRNA_intr.ALOX12P1      | +                     | pseudogene | 0            | intronic      | DTNB          | -                     | protein_cod | 0            |              |
| 3228 | chr17 | 28863976 | + | chr2  | 25857250  | - | Y | N | N | N | N | transl_inter | na | NA | ncRNA_intr.ALOX12P1      | +                     | pseudogene | 0            | intronic      | DTNB          | -                     | protein_cod | 0            |              |
| 3229 | chr17 | 38601161 | + | chr2  | 62957728  | + | Y | N | N | N | N | transl_inter | na | NA | intronic                 | IGFBP4                | +          | protein_cod  | 0             | intronic      | EHBP1                 | +           | protein_cod  | 0            |
| 3230 | chr17 | 38601170 | + | chr2  | 62957482  | + | N | N | N | Y | N | transl_inter | na | NA | intronic                 | IGFBP4                | +          | protein_cod  | 0             | intronic      | EHBP1                 | +           | protein_cod  | 0            |
| 3231 | chr17 | 38601663 | + | chr2  | 62957975  | + | Y | N | N | N | N | transl_inter | na | NA | intronic                 | IGFBP4                | +          | protein_cod  | 0             | intronic      | EHBP1                 | +           | protein_cod  | 0            |
| 3232 | chr17 | 48381716 | + | chr2  | 238128212 | + | Y | N | Y | Y | Y | transl_inter | na | NA | intergenic               | RP11-893F2.9.XYL72    | +,+        | antisense,pi | 16500;41737   | intergenic    | AC107079.1.AC112715.2 | +,+         | lincRNA,prc  | 95472;37522  |
| 3233 | chr17 | 51286189 | + | chr2  | 195227034 | + | Y | N | Y | Y | N | transl_inter | na | NA | intergenic               | RP11-750B16.1.RP11-1  | +,+        | pseudogene   | 102470;144599 | ncRNA_intr    | AC018799.1            | +,+         | lincRNA      | 0            |
| 3234 | chr17 | 74377273 | + | chr2  | 153997622 | + | N | Y | Y | Y | N | transl_inter | na | NA | intronic                 | PRPSA1.SPHK1          | +,+        | protein_cod  | 0             | intergenic    | UBQLN4P2.ATP5F1P4     | +,+         | pseudogene   | 263341;17830 |
| 3235 | chr17 | 62410760 | + | chr20 | 15006367  | + | Y | Y | Y | Y | Y | transl_inter | na | NA | intergenic               | RP131P57.MILR1        | +,+        | pseudogene   | 24710;50809   | intronic      | MACROD2               | +,+         | protein_cod  | 0            |
| 3236 | chr17 | 79499112 | + | chr20 | 60957317  | + | N | N | N | N | Y | transl_inter | na | NA | intronic                 | FSCN2                 | +,+        | protein_cod  | 0             | intergenic    | LAMAS.RPS21           | +,+         | protein_cod  | 14949;4855   |
| 3237 | chr17 | 25277254 | + | chr21 | 14525540  | - | N | N | N | Y | N | transl_inter | na | NA | intergenic               | NONE.RP11-260A9.1     | NONE,+     | NONE,psu     | NONE;31466    | intergenic    | AJ239321.3.FGF7P2     | +,+         | pseudogene   | 32412;196046 |
| 3238 | chr17 | 41465773 | + | chr3  | 73159850  | + | N | Y | N | Y | N | transl_inter | na | NA | ncRNA_exo.LINC00910      | -                     | lincRNA    | 0            | upstream      | uY.RNU2-64P   | +,+                   | snRNA       | 0            |              |
| 3239 | chr17 | 41467150 | + | chr3  | 46877482  | - | N | Y | N | N | N | transl_inter | na | NA | upstream                 | LINC00910             | -          | lincRNA      | 0             | intergenic    | ir.PRSS42.MYL3        | -,-         | protein_cod  | 1907;21870   |
| 3240 | chr17 | 41467210 | + | chr3  | 46877482  | - | Y | N | N | N | N | transl_inter | na | NA | upstream                 | LINC00910             | -          | lincRNA      | 0             | intergenic    | ir.PRSS42.MYL3        | -,-         | protein_cod  | 1907;21870   |
| 3241 | chr17 | 41401166 | + | chr3  | 46877154  | + | Y | Y | N | Y | Y | transl_inter | na | NA | intergenic               | LINC00854.LINC00910   | -,-        | processed_l  | 17828;46047   | intergenic    | PRSS42.MYL3           | -,-         | protein_cod  | 1569;22208   |
| 3242 | chr17 | 4287308  | - | chr4  | 54192535  | - | Y | N | N | Y | N | transl_inter | na | NA | intergenic               | UBE2G1.SPNS3          | +,+        | protein_cod  | 17385;49675   | intronic      | SCFD2                 | -           | protein_cod  | 0            |
| 3243 | chr17 | 33007470 | - | chr4  | 20887010  | - | N | Y | N | Y | N | transl_inter | na | NA | intergenic               | TMEM132E.RP11-212     | +,+        | protein_cod  | 41133;45058   | intronic      | KCNIP4                | -           | protein_cod  | 0            |
| 3244 | chr17 | 3802531  | - | chr5  | 32418333  | - | Y | N | Y | Y | Y | transl_inter | na | NA | intronic                 | P2RX1                 | -          | protein_cod  | 0             | intronic      | ZFR                   | -           | protein_cod  | 0            |
| 3245 | chr17 | 16031093 | - | chr5  | 163756291 | - | N | N | N | Y | N | transl_inter | na | NA | intronic                 | NCOR1                 | -          | protein_cod  | 0             | ncRNA_intr    | CTC-340A15.2          | +           | antisense    | 0            |
| 3246 | chr17 | 39300420 | + | chr5  | 58239387  | + | Y | Y | N | Y | Y | transl_inter | na | NA | intergenic               | KRTAP4-6              | -,-        | protein_cod  | 3681;4758     | intergenic    | CTD-2176I21.2.PDE4D   | -,-         | antisense,pi | 80156;25468  |
| 3247 | chr17 | 28192126 | - |       |           |   |   |   |   |   |   |              |    |    |                          |                       |            |              |               |               |                       |             |              |              |

|      |       |          |   |       |           |   |   |   |   |   |   |   |              |    |    |               |                     |        |              |                |               |                       |        |             |               |
|------|-------|----------|---|-------|-----------|---|---|---|---|---|---|---|--------------|----|----|---------------|---------------------|--------|--------------|----------------|---------------|-----------------------|--------|-------------|---------------|
| 3271 | chr17 | 25274659 | + | chr7  | 61666149  | + | Y | N | N | N | N | Y | transl_inter | na | NA | intergenic;in | NONE,RP11-260A9.1   | NONE,+ | NONE,pseu    | NONE;34061     | intergenic;ir | NONE,RP11-715L17.1    | NONE,+ | NONE,pseu   | NONE;155720   |
| 3272 | chr17 | 16071617 | - | chr8  | 3615589   | - | N | N | N | N | Y | N | transl_inter | na | NA | intronic      | NCOR1               | -      | protein_cod  | 0              | intronic      | CSDM1                 | -      | protein_cod | 0             |
| 3273 | chr17 | 39300399 | - | chr8  | 9387283   | + | Y | N | Y | Y | Y | Y | transl_inter | na | NA | intergenic    | KRTAP4-6,KRTAP4-5   | -      | protein_cod  | 3660;4779      | intergenic    | RP11-375N15.1,RP11-37 | +      | pseudogene  | 72355;25373   |
| 3274 | chr17 | 41401148 | + | chr9  | 140405606 | - | Y | Y | Y | Y | Y | Y | transl_inter | na | NA | intergenic    | LINC00854,LINC00910 | -      | processed_   | 17810;46065    | intronic      | PNPLA7                | -      | protein_cod | 0             |
| 3275 | chr17 | 38296616 | + | chr9  | 90186340  | + | N | N | N | N | N | N | transl_inter | na | NA | UTR5          | CASC3               | +      | protein_cod  | 0              | intronic      | DAPK1                 | +      | protein_cod | 0             |
| 3276 | chr17 | 45209251 | + | chr9  | 37062234  | + | N | N | N | Y | Y | Y | transl_inter | na | NA | intronic      | CDC27               | -      | protein_cod  | 0              | intergenic    | RP11-297B17.2,RP11-46 | +      | pseudogene  | 15000;11294   |
| 3277 | chr17 | 41401173 | + | chrY  | 17224393  | + | Y | Y | Y | Y | Y | Y | transl_inter | na | NA | intergenic;in | LINC00854,LINC00910 | -      | processed_   | 17835;46040    | intergenic    | AC006989.2,HDHD1P1    | +      | pseudogene  | 169798;236149 |
| 3278 | chr18 | 15198100 | - | chr19 | 34444226  | - | Y | N | N | N | N | N | transl_inter | na | NA | upstream      | RP11-454P7.3        | -      | pseudogene   | 0              | intronic      | CEP89                 | -      | protein_cod | 0             |
| 3279 | chr18 | 23467604 | - | chr2  | 209970999 | - | Y | N | N | Y | Y | N | transl_inter | na | NA | intergenic    | RN7SL97P,RP11-737C  | -      | misc_RNA,t   | 69108;65576    | intergenic    | HSPA8P6,CRYGFP        | +      | pseudogene  | 32127;38966   |
| 3280 | chr18 | 23468010 | - | chr2  | 209971149 | - | N | N | N | N | Y | Y | transl_inter | na | NA | intergenic    | RN7SL97P,RP11-737C  | -      | misc_RNA,t   | 69514;65170    | intergenic    | HSPA8P6,CRYGFP        | +      | pseudogene  | 32277;38816   |
| 3281 | chr18 | 29387393 | - | chr2  | 165156024 | - | Y | N | N | N | N | N | transl_inter | na | NA | intergenic    | SLC25A52,TRAPPC8    | -      | protein_cod  | 46550;21743    | ncRNA_intr    | AC092684.1            | -      | lincRNA     | 0             |
| 3282 | chr18 | 47205536 | - | chr2  | 166888711 | + | N | N | Y | N | N | N | transl_inter | na | NA | intergenic    | SMUG1P1,RP11-813F   | +      | pseudogene   | 28006;60657    | ncRNA_intr    | AC010127.3            | +      | antisense   | 0             |
| 3283 | chr18 | 46156415 | + | chr2  | 138747359 | - | N | Y | Y | Y | Y | Y | transl_inter | na | NA | intronic      | CTIF                | +      | protein_cod  | 0              | intronic      | HNMT                  | +      | protein_cod | 0             |
| 3284 | chr18 | 73702325 | + | chr2  | 207688320 | - | N | N | Y | N | N | N | transl_inter | na | NA | intergenic    | RP11-173L6.1,RP11-3 | -      | lincRNA,inc  | 122118;17748   | intergenic    | RP11-95H11.1,AC008268 | +      | lincRNA,inc | 1302;43199    |
| 3285 | chr18 | 28338774 | + | chr2  | 84141818  | + | N | Y | N | Y | N | N | transl_inter | na | NA | intergenic    | RP11-675P14.1,RP11- | +      | lincRNA,inc  | 44522;196012   | intergenic    | AC104395.1,AC016908.1 | +      | pseudogene  | 36141;116446  |
| 3286 | chr18 | 29387427 | + | chr2  | 165155994 | + | N | Y | N | Y | N | N | transl_inter | na | NA | intergenic    | SLC25A52,TRAPPC8    | -      | protein_cod  | 46584;21709    | ncRNA_intr    | AC092684.1            | -      | lincRNA     | 0             |
| 3287 | chr18 | 47337315 | + | chr2  | 41973164  | + | Y | N | Y | N | N | N | transl_inter | na | NA | intronic      | ACAA2,RP11-886H22   | -      | protein_cod  | 0              | intergenic    | snoZ247.LDHAP3        | +      | snoRNA,psi  | 11568;73723   |
| 3288 | chr18 | 12087235 | - | chr21 | 15358108  | - | N | N | N | N | Y | Y | transl_inter | na | NA | intergenic    | RP11-815J4.1,RP11-8 | -      | lincRNA,psc  | 1969;4438      | downstream    | AP001634.1            | +      | miRNA       | 0             |
| 3289 | chr18 | 14860313 | - | chr21 | 14751201  | + | Y | N | N | N | N | N | transl_inter | na | NA | intergenic    | ANKRD30B,RP11-527   | +      | protein_cod  | 7834;17297     | intergenic    | AL050302.1,ANKRD30BI  | +      | protein_cod | 5815;5369     |
| 3290 | chr18 | 12980004 | - | chr22 | 41690895  | + | N | N | N | N | Y | Y | transl_inter | na | NA | intronic      | SEHL1               | +      | protein_cod  | 0              | intergenic    | AL035681.1,ZC3H7B     | +      | protein_cod | 5209;6631     |
| 3291 | chr18 | 13691906 | - | chr4  | 155069745 | + | N | N | Y | N | N | N | transl_inter | na | NA | intronic      | FAM210A             | +      | protein_cod  | 0              | intergenic    | AC020703.1,AC079298.1 | +      | miRNA,miR   | 275142;70316  |
| 3292 | chr18 | 28136585 | - | chr5  | 122104086 | - | N | N | N | N | Y | Y | transl_inter | na | NA | intergenic    | RP11-784B15.1,RP11- | +      | lincRNA,inc  | 1008379;156656 | intergenic    | RP11-166A12.1,SNX2    | +      | lincRNA,prc | 37706;6605    |
| 3293 | chr18 | 46198363 | - | chr5  | 177595868 | - | Y | N | N | N | N | N | transl_inter | na | NA | intronic      | CTIF                | +      | protein_cod  | 0              | intergenic    | RP11-889L3.4,GMCL1P1  | +      | pseudogene  | 2305;16852    |
| 3294 | chr18 | 55381573 | + | chr5  | 175733409 | - | N | Y | N | N | Y | Y | transl_inter | na | NA | ncRNA_intr    | RP11-35G9.3,RP11-35 | +      | antisense,ai | 0              | intronic;intr | SIMC1                 | +      | protein_cod | 0             |
| 3295 | chr18 | 55381819 | + | chr5  | 175733390 | - | Y | N | Y | Y | N | N | transl_inter | na | NA | ncRNA_intr    | RP11-35G9.3,RP11-35 | +      | antisense,ai | 0              | intronic      | SIMC1                 | +      | protein_cod | 0             |
| 3296 | chr18 | 66572501 | + | chr5  | 78731981  | - | Y | N | Y | Y | N | Y | transl_inter | na | NA | intronic      | CCDC102B            | +      | protein_cod  | 0              | intronic      | HOMER1                | -      | protein_cod | 0             |
| 3297 | chr18 | 30668455 | + | chr5  | 32974596  | + | N | Y | N | N | N | N | transl_inter | na | NA | intronic      | CCDC178             | -      | protein_cod  | 0              | ncRNA_intr    | CTD-2066L21.3         | -      | lincRNA     | 0             |
| 3298 | chr18 | 30668703 | + | chr5  | 32974588  | + | N | Y | N | Y | N | N | transl_inter | na | NA | intronic      | CCDC178             | -      | protein_cod  | 0              | ncRNA_intr    | CTD-2066L21.3         | -      | lincRNA     | 0             |
| 3299 | chr18 | 30668724 | + | chr5  | 32974588  | + | N | Y | N | Y | Y | Y | transl_inter | na | NA | intronic      | CCDC178             | -      | protein_cod  | 0              | ncRNA_intr    | CTD-2066L21.3         | -      | lincRNA     | 0             |
| 3300 | chr18 | 9980081  | - | chr6  | 96045634  | - | N | N | Y | N | N | N | transl_inter | na | NA | intergenic    | VAPA,AP005271.1     | +      | protein_cod  | 20063;25016    | ncRNA_intr    | UFL1-AS1              | -      | antisense   | 0             |
| 3301 | chr18 | 11806088 | + | chr6  | 149425271 | - | N | N | Y | N | N | N | transl_inter | na | NA | intronic      | GNAL                | +      | protein_cod  | 0              | intergenic    | UST,RP11-365H23.1     | +      | protein_cod | 27145;7874    |
| 3302 | chr18 | 39770209 | + | chr6  | 153748714 | - | N | N | N | Y | Y | Y | transl_inter | na | NA | ncRNA_intr    | LINC00907           | +      | lincRNA      | 0              | intergenic    | RNA5SP225,RP11-331O   | +      | rRNA,pseu   | 7007;238128   |
| 3303 | chr18 | 29384591 | - | chr7  | 109236787 | + | N | N | N | N | Y | Y | transl_inter | na | NA | intergenic    | SLC25A52,TRAPPC8    | -      | protein_cod  | 43748;24545    | ncRNA_intr    | AC073071.1            | +      | lincRNA     | 0             |
| 3304 | chr18 | 29384761 | - | chr7  | 109236696 | + | N | N | N | N | Y | Y | transl_inter | na | NA | intergenic    | SLC25A52,TRAPPC8    | -      | protein_cod  | 43918;24375    | ncRNA_intr    | AC073071.1            | +      | lincRNA     | 0             |
| 3305 | chr18 | 77780755 | - | chr7  | 63971332  | + | Y | N | Y | Y | Y | Y | transl_inter | na | NA | intronic      | TXNL4A              | +      | protein_cod  | 0              | intergenic    | HNRNPC7,ZNF680        | +      | pseudogene  | 9225;8930     |
| 3306 | chr18 | 22222853 | - | chr8  | 11090939  | + | N | N | Y | N | Y | Y | transl_inter | na | NA | ncRNA_intr    | RP11-449D8.1        | +      | lincRNA      | 0              | intergenic    | AF131215.8,LINC00529  | +      | lincRNA,inc | 37859;6096    |
| 3307 | chr18 | 3572482  | + | chr8  | 134325214 | - | Y | N | N | Y | Y | N | transl_inter | na | NA | intronic      | DLGAP1              | -      | protein_cod  | 0              | intergenic    | NDRG1,CTC-458A3.1     | +      | protein_cod | 10949;13026   |
| 3308 | chr18 | 22222371 | + | chr8  | 11098987  | - | N | N | Y | Y | N | N | transl_inter | na | NA | ncRNA_intr    | RP11-449D8.1        | +      | lincRNA      | 0              | intergenic;ir | AF131215.8,LINC00529  | +      | lincRNA,inc | 37807;6148    |
| 3309 | chr18 | 21867768 | - | chr9  | 818000    | - | N | N | N | Y | Y | N | transl_inter | na | NA | intronic      | OSBPL1A             | -      | protein_cod  | 0              | intergenic    | KANK1,DMRT1           | +      | protein_cod | 71895;23690   |
| 3310 | chr18 | 49492    | + | chr9  | 141069873 | - | N | N | N | N | Y | Y | transl_inter | na | NA | intronic      | RP11-683L23.1       | -      | protein_cod  | 0              | ncRNA_exo     | TUBBP5                | +      | pseudogene  | 0             |
| 3311 | chr18 | 49556    | + | chr9  | 141069873 | - | Y | N | Y | N | Y | N | transl_inter | na | NA | exonic        | RP11-683L23.1       | -      | protein_cod  | 0              | ncRNA_exo     | TUBBP5                | +      | pseudogene  | 0             |
| 3312 | chr18 | 49577    | + | chr9  | 141069873 | - | N | N | Y | N | N | N | transl_inter | na | NA | intronic      | RP11-683L23.1       | -      | protein_cod  | 0              | ncRNA_exo     | TUBBP5                | +      | pseudogene  | 0             |
| 3313 | chr18 | 9277339  | + | chr9  | 68434050  | - | N | Y | N | N | N | N | transl_inter | na | NA | intronic      | ANKRD12             | +      | protein_cod  | 0              | ncRNA_intr    | RP11-764K9.4          | -      | pseudogene  | 0             |
| 3314 | chr18 | 71171154 | + | chr9  | 127885509 | - | Y | N | N | Y | Y | Y | transl_inter | na | NA | intergenic;in | RP11-25L3.3,FBXO15  | -      | lincRNA,pro  | 10118;29074    | intronic;intr | SCAI                  | -      | protein_cod | 0             |
| 3315 | chr18 | 15240800 | + | chr9  | 69817517  | + | N | N | N | N | Y | Y | transl_inter | na | NA | intergenic    | RP11-454P7.3,BNIP3F | -      | pseudogene   | 43026;6628     | intergenic    | IGKV1OR-2,AL359955.1  | +      | IG_V_pseu   | 39564;4243    |
| 3316 | chr18 | 40776992 | - | chrX  | 77458203  | + | N | Y | N | N | N | N | transl_inter | na | NA | intergenic    | RIT2,SYT4           | -      | protein_cod  | 81335;70851    | intergenic    | FNDC3CP,CYSLTR1       | -      | pseudogene  | 30284;68758   |
| 3317 | chr18 | 48949793 | - | chrX  | 54282452  | + | Y | Y | Y | Y | Y | Y | transl_inter | na | NA | ncRNA_intr    | RP11-267C16.1       | +      | lincRNA      | 0              | intronic      | WNK3                  | -      | protein_cod | 0             |
| 3318 | chr19 | 51998626 | + | chr2  | 9916714   | + | N | N | Y | N | N | N | transl_inter | na | NA | intronic      | SIGLEC12            | -      | protein_cod  | 0              | intergenic    | RP11-521D12.5,TAF1B   | +      | lincRNA,prc | 6244;66769    |
| 3319 | chr19 | 33444265 | - | chr20 | 26220635  | - | N | Y | N | N | N | N | transl_inter | na | NA | intronic;intr | CEP89               | -      | protein_cod  | 0              | ncRNA_intr    | MIR663A               | -      | processed_  | 0             |
| 3320 | chr19 | 54925721 | + | chr21 | 44756093  | + | N | N | N | Y | N | N | transl_inter | na | NA | upstream      | TTYH1               | +      | protein_cod  | 0              | intergenic    | LINC00322,AP001046.5  | +      | lincRNA,inc | 4174;21934    |
| 3321 | chr19 | 53917707 | + | chr22 | 42905848  | - | N | N | N | Y | Y | Y | transl_inter | na | NA | intronic      | ZNF765              | +      | protein_cod  | 0              | ncRNA_intr    | SERHL                 | -      | processed_  | 0             |
| 3322 | chr19 | 53917736 | + | chr22 | 42906257  | - | N | Y | Y | N | N | N | transl_inter | na | NA | intronic      | ZNF765              | +      | protein_cod  | 0              | ncRNA_intr    | SERHL                 | -      | processed_  | 0             |
| 3323 | chr19 | 19632428 | + | chr22 | 16347242  | + | Y | Y | Y | Y | Y | Y | transl_inter | na | NA | intronic      | NDUFA13,YJEFN3,CT   | +,+,+  | protein_cod  | 0              | ncRNA_intr    | NF1P6                 | +      | pseudogene  | 0             |
| 3324 | chr19 | 33444265 | - | chr3  | 75983387  | + | Y | Y | Y | Y | Y | Y | transl_inter | na | NA | intronic;intr | CEP89               | -      | protein_cod  | 0              | intronic      | ROBO2                 | +      | protein_cod | 0             |
| 3325 | chr19 | 52453840 | - | chr4  | 137859689 | + | N | Y | N | N | N | N | transl_inter | na | NA | ncRNA_intr    | HCCAT3              | +      | antisense    | 0              | ncRNA_intr    | RP11-138L17.1         | -      | lincRNA     | 0             |
| 3326 | chr19 | 28819016 | + | chr4  | 43139160  | + | Y | N | N | N | Y | Y | transl_inter | na | NA | ncRNA_intr    | AC005780.1          | -      | lincRNA      | 0              | ncRNA_intr    | RP11-395F4.1          | +      | lincRNA     | 0             |
| 3327 | chr19 | 1037858  | - | chr6  | 111180310 | - | N | N | N | N | Y | Y | transl_inter | na | NA | exonic        | CNN2                | +      | protein_cod  | 0              | ncRNA_exo     | CNN2P9                | +      | pseudogene  | 0             |
| 3328 | chr19 | 58938639 | - | chr6  | 113730621 | + | N | N | Y | N | N | Y | transl_inter | na | NA | intergenic    | CTD-2619J13.16,CTD- | +      | lincRNA,inc  | 7962;1360      | intergenic    | RP11-437J19.1,RP1-124 | -      | lincRNA,inc | 41475;19121   |
| 3329 | chr19 | 21851909 | - | chr7  | 46808418  | - | Y | N | N | N | N | N | transl_inter | na | NA | intergenic    | RP11-420K14.1,RP11- | +      | pseudogene   | 12807;8443     | intergenic    | AC073115.7,AC023669.2 | +      | lincRNA,psc | 39921;104117  |
| 3330 | chr19 | 21851946 | - | chr7  | 46808003  | - | N | N | Y | N | N | N | transl_inter | na | NA |               |                     |        |              |                |               |                       |        |             |               |

|      |      |           |     |       |           |   |   |   |   |   |   |              |    |    |               |                    |    |             |              |               |                        |    |              |               |
|------|------|-----------|-----|-------|-----------|---|---|---|---|---|---|--------------|----|----|---------------|--------------------|----|-------------|--------------|---------------|------------------------|----|--------------|---------------|
| 3355 | chr2 | 237615489 | -   | chr21 | 39080014  | + | N | Y | N | N | N | transl_inter | na | NA | intergenic    | ACKR3,AC011286.1   | ++ | protein_cod | 124488;26536 | intronic;intr | KCNJ6                  | -  | protein_cod  | 0             |
| 3356 | chr2 | 237615575 | -   | chr21 | 39080014  | + | Y | N | Y | N | Y | transl_inter | na | NA | intergenic    | ACKR3,AC011286.1   | ++ | protein_cod | 124574;26450 | intronic;intr | KCNJ6                  | -  | protein_cod  | 0             |
| 3357 | chr2 | 85714118  | -   | chr22 | 49425468  | - | Y | N | Y | Y | Y | transl_inter | na | NA | intergenic    | Y_RNA,AC016753.7   | +  | misc_RNA,t  | 26743;3935   | intergenic    | WI2-81516E3.1,RPL35P1  | +- | lincRNA,ps   | 131270;184369 |
| 3358 | chr2 | 91725260  | -   | chr22 | 22621352  | - | N | N | N | N | Y | transl_inter | na | NA | intergenic    | AC018696.5,AC01869 | +  | pseudogene  | 1384;8914    | intergenic    | VPREB1.LL22NC03-2H8    | +- | protein_cod  | 21425;16860   |
| 3359 | chr2 | 138521333 | -   | chr22 | 44043419  | - | N | Y | N | N | N | transl_inter | na | NA | intergenic    | Y_RNA,AC020601.1   | +- | misc_RNA,l  | 48322;114991 | intronic      | FAM83F                 | +  | protein_cod  | 0             |
| 3360 | chr2 | 138521731 | -   | chr22 | 44043480  | - | N | N | N | Y | N | transl_inter | na | NA | intergenic    | Y_RNA,AC020601.1   | +- | misc_RNA,l  | 48720;114593 | intronic      | FAM83F                 | +  | protein_cod  | 0             |
| 3361 | chr2 | 47809988  | -   | chr22 | 24195862  | + | N | N | Y | N | Y | transl_inter | na | NA | intergenic    | AC138655.1,AC07925 | +  | protein_cod | 7990;107867  | intergenic    | DERL3,KB-1125A3.11     | +- | protein_cod  | 14663;2752    |
| 3362 | chr2 | 92177709  | -   | chr22 | 22639645  | + | N | N | N | Y | N | transl_inter | na | NA | intergenic    | CHEK2P3,AC128677.1 | +  | pseudogene  | 26073;16997  | ncRNA_exo     | LL22NC03-2H8.5         | +- | lincRNA      | 0             |
| 3363 | chr2 | 91694631  | +   | chr22 | 17048922  | - | N | N | N | Y | N | transl_inter | na | NA | upstream      | AC018696.2         | -  | pseudogene  | 0            | intergenic    | KB-67B5.17,KB-67B5.12  | +- | lincRNA,ps   | 40801;3989    |
| 3364 | chr2 | 174563055 | +   | chr22 | 43871887  | - | N | N | N | Y | N | transl_inter | na | NA | intergenic    | AC013410.1,AC01341 | +- | pseudogene  | 121986;7621  | intronic      | MPPEP1                 | +  | protein_cod  | 0             |
| 3365 | chr2 | 92045115  | +   | chr22 | 16883838  | + | N | N | Y | N | N | transl_inter | na | NA | intergenic    | ABCD1P5,AC127391.1 | ++ | pseudogene  | 13287;2295   | intergenic    | ABCD1P4,LA16c-17H1.3   | +- | pseudogene   | 12225;2218    |
| 3366 | chr2 | 92045320  | +   | chr22 | 16883871  | + | N | N | N | Y | N | transl_inter | na | NA | intergenic    | ABCD1P5,AC127391.1 | ++ | pseudogene  | 13492;2090   | intergenic    | ABCD1P4,LA16c-17H1.3   | +- | pseudogene   | 12168;2275    |
| 3367 | chr2 | 151053655 | -   | chr3  | 95544397  | - | N | Y | Y | Y | Y | transl_inter | na | NA | ncRNA_intrn   | AC016682.1         | +  | lincRNA     | 0            | intergenic    | MTHFD2P1,AC108739.1    | +- | pseudogene   | 142360;341264 |
| 3368 | chr2 | 5628590   | +   | chr3  | 27926727  | - | N | N | N | Y | N | transl_inter | na | NA | intergenic    | AC073143.1,AC10705 | +- | pseudogene  | 174323;61322 | intergenic    | AC098973.2,AC092415.1  | +- | lincRNA,inc  | 59885;46024   |
| 3369 | chr2 | 5628684   | +   | chr3  | 27926599  | - | Y | Y | Y | Y | Y | transl_inter | na | NA | intergenic    | AC073143.1,AC10705 | +- | pseudogene  | 174417;61228 | intergenic    | AC098973.2,AC092415.1  | +- | lincRNA,inc  | 59867;46042   |
| 3370 | chr2 | 41453302  | +   | chr3  | 83756618  | - | Y | Y | N | N | N | transl_inter | na | NA | intergenic    | HNRNPA1P57,AC0101  | +- | pseudogene  | 68607;370224 | intergenic    | CYP51A1P1,SRRM1P2      | +- | pseudogene   | 899446;229578 |
| 3371 | chr2 | 160148933 | +   | chr3  | 58772449  | - | Y | N | N | N | N | transl_inter | na | NA | intergenic    | WDSUB1,BAZ2B       | +  | protein_cod | 5623;26557   | intronic      | C3orf67                | -  | protein_cod  | 0             |
| 3372 | chr2 | 5628691   | +   | chr3  | 140373031 | + | N | N | N | N | Y | transl_inter | na | NA | intergenic;in | AC073143.1,AC10705 | +- | pseudogene  | 174424;61221 | intergenic    | RP11-13L2.1,TRIM42     | +- | pseudogene   | 34352;23850   |
| 3373 | chr2 | 223680378 | +   | chr3  | 149962939 | + | N | N | N | Y | N | transl_inter | na | NA | intergenic    | AC016712.2,ACSL3   | +- | pseudogene  | 88825;45274  | intergenic    | RP11-167H9.6,RP11-483  | +- | lincRNA,inc  | 4943;20260    |
| 3374 | chr2 | 26556299  | -   | chr4  | 90644970  | - | N | N | N | N | Y | transl_inter | na | NA | intronic;intr | CEPT1,GPR113       | +- | protein_cod | 0            | ncRNA_intrn   | RP11-115D19.1          | +  | antisense    | 0             |
| 3375 | chr2 | 26556299  | -   | chr4  | 130703268 | - | Y | Y | Y | Y | Y | transl_inter | na | NA | intronic;intr | CEPT1,GPR113       | +- | protein_cod | 0            | ncRNA_intrn   | RP11-422J15.1          | +  | lincRNA      | 0             |
| 3376 | chr2 | 27611576  | -   | chr4  | 80740775  | - | Y | Y | Y | N | Y | transl_inter | na | NA | intronic      | PPM1G              | -  | protein_cod | 0            | intergenic    | RP11-452C8.1,PCAT4     | +- | lincRNA,inc  | 86784;43850   |
| 3377 | chr2 | 228185886 | -   | chr4  | 127411743 | - | N | Y | N | N | N | transl_inter | na | NA | ncRNA_intrn   | AC097662.2         | +  | antisense   | 0            | intergenic    | RP11-318I4.2,RBM48P1   | +- | pseudogene   | 383665;72921  |
| 3378 | chr2 | 228186046 | -   | chr4  | 127412018 | - | N | N | N | N | Y | transl_inter | na | NA | ncRNA_intrn   | AC097662.2         | +  | antisense   | 0            | intergenic    | RP11-318I4.2,RBM48P1   | +- | pseudogene   | 383940;72646  |
| 3379 | chr2 | 14414570  | -   | chr4  | 36298642  | + | Y | N | N | N | N | transl_inter | na | NA | ncRNA_intrn   | LINC00276          | -  | lincRNA     | 0            | intronic      | DTHD1                  | +  | protein_cod  | 0             |
| 3380 | chr2 | 37800840  | -   | chr4  | 11808084  | + | N | N | N | N | Y | transl_inter | na | NA | intergenic    | QPCT,RNU6-1116P    | +- | protein_cod | 7975;54213   | ncRNA_intrn   | RP11-281P23.2          | +- | lincRNA      | 0             |
| 3381 | chr2 | 116695706 | +   | chr4  | 39128560  | - | Y | Y | Y | Y | Y | transl_inter | na | NA | intergenic    | DP10,RP11-338I24.1 | +  | protein_cod | 92378;749088 | upstream;dx   | RP11-360F5.1,KLHL5     | +- | antisense,pi | 0             |
| 3382 | chr2 | 162138903 | +   | chr4  | 49289276  | - | N | N | N | N | Y | transl_inter | na | NA | ncRNA_exo     | AC009299.4         | +  | pseudogene  | 0            | intergenic    | RP11-128I1K21.7,RP11-2 | +- | pseudogene   | 40344;199667  |
| 3383 | chr2 | 183914145 | +   | chr4  | 91967031  | - | N | Y | N | N | N | transl_inter | na | NA | intergenic    | NCKAP1,SNORA77     | +  | protein_cod | 10559;14818  | intronic      | CCSER1                 | +  | protein_cod  | 0             |
| 3384 | chr2 | 183914211 | +   | chr4  | 91967078  | - | N | N | N | Y | N | transl_inter | na | NA | intergenic    | NCKAP1,SNORA77     | +  | protein_cod | 10625;14752  | intronic      | CCSER1                 | +  | protein_cod  | 0             |
| 3385 | chr2 | 42052606  | +   | chr4  | 66413931  | + | Y | Y | Y | Y | Y | transl_inter | na | NA | intergenic    | LDHAP3,AC009413.2  | +- | pseudogene  | 4712;24737   | intronic      | EPHA5                  | -  | protein_cod  | 0             |
| 3386 | chr2 | 63935288  | +   | chr5  | 118935641 | - | Y | N | N | N | N | transl_inter | na | NA | intergenic    | AC096664.3,AC09666 | +- | miRNA,ps    | 12819;8968   | intergenic    | FABP5P6.snoU13         | +- | pseudogene   | 44288;10256   |
| 3387 | chr2 | 14414570  | -   | chr6  | 130218879 | + | N | Y | Y | Y | N | transl_inter | na | NA | ncRNA_intrn   | LINC00276          | -  | lincRNA     | 0            | intergenic;ir | TMEM244,L3MBTL3        | +- | pseudogene   | 36187;115965  |
| 3388 | chr2 | 139140877 | -   | chr6  | 91673347  | + | N | Y | N | N | N | transl_inter | na | NA | intergenic    | AC097523.3,AC09772 | +- | pseudogene  | 75337;28759  | intergenic    | MAD3P7,RP1-177I10.1    | +- | protein_cod  | 376583;426684 |
| 3389 | chr2 | 26673611  | -   | chr7  | 19518322  | - | Y | Y | Y | Y | Y | transl_inter | na | NA | intronic      | DRC1               | +  | protein_cod | 0            | ncRNA_intrn   | AC007091.1             | +  | lincRNA      | 0             |
| 3390 | chr2 | 104694503 | -   | chr7  | 135542558 | - | N | N | Y | N | Y | transl_inter | na | NA | downstream    | RP11-761I4.1       | +  | lincRNA     | 0            | intergenic;ir | AC091736.1,AC015987.1  | +- | miRNA,anti   | 59701;68645   |
| 3391 | chr2 | 104694523 | -   | chr7  | 135542529 | - | N | Y | Y | N | N | transl_inter | na | NA | downstream    | RP11-761I4.1       | +  | lincRNA     | 0            | intergenic    | AC091736.1,AC015987.1  | +- | miRNA,anti   | 59672;68674   |
| 3392 | chr2 | 132767884 | -   | chr7  | 57927960  | - | N | N | N | Y | N | transl_inter | na | NA | intergenic    | RP1-156L9.1,AC0937 | +- | lincRNA,ps  | 16150;27476  | intergenic    | RP11-548K12.12,NONE    | +- | NONE         | 31208;NONE    |
| 3393 | chr2 | 132800199 | -   | chr7  | 57932777  | - | N | N | N | Y | N | transl_inter | na | NA | intergenic    | AC093787.1,RP11-62 | +- | pseudogene  | 4633;37664   | intergenic;ir | RP11-548K12.12,NONE    | +- | NONE         | 36025;NONE    |
| 3394 | chr2 | 132800204 | -   | chr7  | 57932733  | - | Y | N | N | N | N | transl_inter | na | NA | intergenic;in | AC093787.1,RP11-62 | +- | pseudogene  | 4638;37659   | intergenic    | RP11-548K12.12,NONE    | +- | NONE         | 35981;NONE    |
| 3395 | chr2 | 132800204 | -   | chr7  | 57932777  | - | N | Y | N | N | N | transl_inter | na | NA | intergenic;in | AC093787.1,RP11-62 | +- | pseudogene  | 4638;37659   | intergenic;ir | RP11-548K12.12,NONE    | +- | NONE         | 36025;NONE    |
| 3396 | chr2 | 132813253 | -   | chr7  | 65054324  | - | N | Y | N | N | N | transl_inter | na | NA | intergenic    | AC093787.1,RP11-62 | +- | pseudogene  | 17687;24610  | intergenic    | RP11-667F9.1,RP13-157  | +- | pseudogene   | 34667;27866   |
| 3397 | chr2 | 214711067 | -   | chr7  | 26380206  | - | Y | Y | Y | Y | N | transl_inter | na | NA | intronic      | SPAG16             | +  | protein_cod | 0            | intronic      | CREB5                  | +  | protein_cod  | 0             |
| 3398 | chr2 | 214711089 | -   | chr7  | 26380086  | - | N | N | N | N | Y | transl_inter | na | NA | intronic      | SPAG16             | +  | protein_cod | 0            | intronic      | CREB5                  | +  | protein_cod  | 0             |
| 3399 | chr2 | 11899899  | -   | chr7  | 138786213 | + | N | N | N | Y | N | transl_inter | na | NA | intronic      | LPIN1              | +  | protein_cod | 0            | intronic      | ZC3HAV1                | +  | protein_cod  | 0             |
| 3400 | chr2 | 91662944  | -   | chr7  | 64981468  | + | N | N | N | N | Y | transl_inter | na | NA | intergenic    | AC018696.1,IGKV1OF | ++ | pseudogene  | 26795;16143  | intergenic    | RP11-328P23.3,RP11-66  | +- | pseudogene   | 7611;9074     |
| 3401 | chr2 | 104694503 | +   | chr7  | 135542558 | - | N | Y | Y | N | N | transl_inter | na | NA | downstream    | RP11-761I4.1       | +  | lincRNA     | 0            | intergenic;ir | AC091736.1,AC015987.1  | +- | miRNA,anti   | 59701;68645   |
| 3402 | chr2 | 229533447 | +   | chr7  | 128077973 | + | N | Y | Y | N | Y | transl_inter | na | NA | intergenic;in | AC009410.1,AC07401 | +- | lincRNA,inc | 57336;14806  | intergenic    | RP11-155G14.1,RNU7-5   | +- | pseudogene   | 4206;5530     |
| 3403 | chr2 | 229533447 | +   | chr7  | 128078020 | + | N | Y | N | Y | N | transl_inter | na | NA | intergenic;in | AC009410.1,AC07401 | +- | lincRNA,inc | 57336;14806  | intergenic    | RP11-155G14.1,RNU7-5   | +- | pseudogene   | 4253;5483     |
| 3404 | chr2 | 32046156  | -   | chr8  | 97440448  | - | N | Y | N | Y | N | transl_inter | na | NA | intergenic    | AL121652.2,KRT18P5 | +- | miRNA,ps    | 10799;1504   | intergenic    | KB-144A8A5.1,RNU6-117  | +- | lincRNA,snf  | 40782;2834    |
| 3405 | chr2 | 32046191  | -   | chr8  | 97440541  | - | Y | N | N | N | N | transl_inter | na | NA | intergenic    | AL121652.2,KRT18P5 | +- | miRNA,ps    | 10834;1469   | intergenic    | KB-144A8A5.1,RNU6-117  | +- | lincRNA,snf  | 40875;2741    |
| 3406 | chr2 | 32046266  | -   | chr8  | 97440665  | - | N | N | N | N | Y | transl_inter | na | NA | intergenic    | AL121652.2,KRT18P5 | +- | miRNA,ps    | 10909;1394   | intergenic    | KB-144A8A5.1,RNU6-117  | +- | lincRNA,snf  | 40999;2617    |
| 3407 | chr2 | 221057276 | -   | chr8  | 141960213 | - | N | N | N | N | Y | transl_inter | na | NA | ncRNA_intrn   | AC114765.2,AC11476 | +- | lincRNA,inc | 0            | intronic      | PTK2                   | -  | protein_cod  | 0             |
| 3408 | chr2 | 95418904  | -   | chr8  | 38382379  | + | N | Y | Y | Y | N | transl_inter | na | NA | intergenic    | AC073464.6,CYP4F32 | +- | pseudogene  | 1866;6100    | intronic      | C8orf66                | -  | protein_cod  | 0             |
| 3409 | chr2 | 130968479 | -   | chr9  | 114404927 | - | Y | Y | Y | Y | N | transl_inter | na | NA | ncRNA_intrn   | AC0118804.6        | +- | pseudogene  | 0            | intronic      | DNAJC25,DNAJC25-GN     | +- | protein_cod  | 0             |
| 3410 | chr2 | 131777980 | -   | chr9  | 1407543   | - | N | N | N | Y | N | transl_inter | na | NA | intronic      | ARHGEF4            | +  | protein_cod | 0            | intergenic    | RNA5SP279,RP11-443B3   | +- | rRNA,pseu    | 73590;570241  |
| 3411 | chr2 | 38505902  | +   | chr9  | 68418844  | - | Y | Y | Y | Y | Y | transl_inter | na | NA | intergenic    | AC009229.5,GAPDHP  | +  | lincRNA,ps  | 39170;6650   | intergenic;ir | MIR4477A,RP11-764K9.1  | +- | miRNA,ps     | 3456;9017     |
| 3412 | chr2 | 5628691   | +   | chr9  | 117653033 | + | Y | Y | N | Y | N | transl_inter | na | NA | intergenic;in | AC073143.1,AC10705 | +- | pseudogene  | 174424;61221 | intergenic    | RP11-78H18.2,TNFSF8    | +- | pseudogene   | 42168;12091   |
| 3413 | chr2 | 35879354  | +</ |       |           |   |   |   |   |   |   |              |    |    |               |                    |    |             |              |               |                        |    |              |               |

|      |       |          |   |       |           |   |   |   |   |   |   |              |    |    |               |                      |         |              |               |               |                       |         |              |               |
|------|-------|----------|---|-------|-----------|---|---|---|---|---|---|--------------|----|----|---------------|----------------------|---------|--------------|---------------|---------------|-----------------------|---------|--------------|---------------|
| 3439 | chr20 | 13915466 | + | chr5  | 132961595 | + | Y | N | N | N | N | transl_inter | na | NA | intronic      | SEL1L2               | -       | protein_cod  | 0             | ncRNA_exo     | AC005195.1            | -       | miRNA        | 0             |
| 3440 | chr20 | 22863396 | + | chr5  | 9024649   | + | N | N | Y | Y | Y | transl_inter | na | NA | intergenic    | KRT18P3,CYB5P4       | -,-     | pseudogene   | 148669;2912   | ncRNA_intr    | CTD-2215L10.1         | +       | antisense    | 0             |
| 3441 | chr20 | 25840708 | + | chr5  | 154275111 | + | Y | N | Y | Y | Y | transl_inter | na | NA | intronic      | FAM182B              | -       | protein_cod  | 0             | intronic;intr | GEMIN5                | +       | protein_cod  | 0             |
| 3442 | chr20 | 25844028 | + | chr5  | 154275111 | + | N | Y | N | N | N | transl_inter | na | NA | intronic      | FAM182B              | -       | protein_cod  | 0             | intronic;intr | GEMIN5                | +       | protein_cod  | 0             |
| 3443 | chr20 | 25888637 | - | chr6  | 154216091 | - | Y | Y | Y | Y | Y | transl_inter | na | NA | intergenic    | FAM182B,CFTRP1       | -,-     | protein_cod  | 39851;11498   | intergenic    | RNU6-896P,HMGB3P19    | +,+     | snRNA,pse    | 213403;43477  |
| 3444 | chr20 | 33248517 | - | chr6  | 67782166  | + | Y | N | Y | N | Y | transl_inter | na | NA | intronic      | PIGU                 | -       | protein_cod  | 0             | intergenic    | RNU7-66PAL590874.1    | +,+     | snRNA,miR    | 343369;77236  |
| 3445 | chr20 | 54859608 | - | chr6  | 94728887  | + | Y | N | N | N | N | transl_inter | na | NA | intergenic    | RP11-380D15.2,RP11-  | +,+     | pseudogene   | 15321;11415   | intergenic    | RP11-524K14.1,RP3-463 | +,+     | lincRNA,linc | 129759;144751 |
| 3446 | chr20 | 18670567 | - | chr7  | 58095957  | - | Y | N | Y | N | N | transl_inter | na | NA | ncRNA_intr    | RP11-379J5.5         | -       | antisense    | 0             | intronic;intr | RNF216                | +       | protein_cod  | 0             |
| 3447 | chr20 | 22064187 | - | chr7  | 153203509 | - | Y | N | N | N | N | transl_inter | na | NA | intergenic    | RP11-125P18.1,RP5-1  | +,+     | lincRNA,linc | 8949;137005   | intergenic    | AC091652.2,DPP6       | +,+     | pseudogene   | 56549;380673  |
| 3448 | chr20 | 25831927 | - | chr7  | 57739355  | - | N | N | N | Y | N | transl_inter | na | NA | intronic      | FAM182B              | -       | protein_cod  | 0             | ncRNA_exo     | RP11-368M16.3         | +       | pseudogene   | 0             |
| 3449 | chr20 | 25864860 | - | chr7  | 57731047  | - | N | N | N | Y | N | transl_inter | na | NA | intergenic;in | FAM182B,CFTRP1       | -       | protein_cod  | 16074;35275   | intergenic    | RP11-368M16.7,RP11-54 | +,+     | pseudogene   | 15949;99278   |
| 3450 | chr20 | 5632309  | - | chr7  | 46566840  | + | Y | N | N | Y | N | transl_inter | na | NA | intergenic    | GPCPD1,C20orf196     | +,+     | protein_cod  | 40637;98730   | intergenic    | AC004869.2,HMG1P19    | +,+     | lincRNA,pse  | 45664;107372  |
| 3451 | chr20 | 26146311 | - | chr7  | 57608296  | + | Y | N | Y | N | Y | transl_inter | na | NA | intergenic    | RP13-329D4.3,MIR661  | +,+     | lincRNA,pro  | 31477;21245   | intergenic    | RP11-1324A7.2,NCOR1F  | +,+     | pseudogene   | 62695;51204   |
| 3452 | chr20 | 26244567 | - | chr7  | 57732562  | + | Y | N | N | N | N | transl_inter | na | NA | intergenic    | MIR663A,NONE         | -,-NONE | processed_   | 12405;NONE    | intergenic    | RP11-368M16.7,RP11-54 | +,+     | pseudogene   | 17464;97763   |
| 3453 | chr20 | 25856289 | + | chr7  | 57872102  | - | N | Y | N | Y | N | transl_inter | na | NA | intergenic    | FAM182B,CFTRP1       | -,-     | protein_cod  | 7503;43846    | intergenic    | RP11-548K12.4,RP11-54 | +,+     | pseudogene   | 34875;5205    |
| 3454 | chr20 | 18670567 | + | chr7  | 58095957  | + | N | Y | N | Y | Y | transl_inter | na | NA | ncRNA_intr    | RP11-379J5.5         | -       | antisense    | 0             | intronic;intr | RNF216                | +       | protein_cod  | 0             |
| 3455 | chr20 | 25864859 | + | chr7  | 57730098  | + | Y | N | N | N | N | transl_inter | na | NA | intergenic;in | FAM182B,CFTRP1       | -       | protein_cod  | 16073;35276   | intergenic    | RP11-368M16.7,RP11-54 | +,+     | pseudogene   | 15000;100227  |
| 3456 | chr20 | 25864859 | + | chr7  | 57730641  | + | N | N | N | Y | Y | transl_inter | na | NA | intergenic;in | FAM182B,CFTRP1       | -       | protein_cod  | 16073;35276   | intergenic    | RP11-368M16.7,RP11-54 | +,+     | pseudogene   | 15543;99684   |
| 3457 | chr20 | 25864860 | + | chr7  | 57731102  | + | N | N | Y | Y | N | transl_inter | na | NA | intergenic;in | FAM182B,CFTRP1       | -       | protein_cod  | 16074;35275   | intergenic    | RP11-368M16.7,RP11-54 | +,+     | pseudogene   | 16004;99223   |
| 3458 | chr20 | 48875003 | - | chr8  | 144018695 | - | N | Y | Y | N | N | transl_inter | na | NA | intergenic    | CEBPB,RP11-290F20.   | +,+     | protein_cod  | 65791;9020    | intergenic    | CYP11B2,RP11-273G15.  | +,+     | protein_cod  | 19436;44460   |
| 3459 | chr20 | 48875004 | - | chr8  | 144018724 | - | Y | N | N | N | N | transl_inter | na | NA | intergenic    | CEBPB,RP11-290F20.   | +,+     | protein_cod  | 65792;9019    | intergenic    | CYP11B2,RP11-273G15.  | +,+     | protein_cod  | 19465;44431   |
| 3460 | chr20 | 53466092 | - | chr8  | 42006955  | - | N | N | N | Y | N | transl_inter | na | NA | intergenic    | DOX5,RNU4ATAC7P      | +,+     | protein_cod  | 198382;10135  | intergenic    | RP11-589C21.6,RP11-58 | +,+     | lincRNA,ant  | 9685;2335     |
| 3461 | chr20 | 60370116 | - | chr8  | 142724303 | - | N | N | N | Y | N | transl_inter | na | NA | intronic      | CDK4                 | +       | protein_cod  | 0             | intergenic    | AC138647.1,AC104417.1 | +,+     | pseudogene   | 195466;302557 |
| 3462 | chr20 | 23248605 | - | chr8  | 103954656 | + | N | N | N | N | Y | transl_inter | na | NA | intergenic    | RP4-757E23.2,RP3-32  | +,+     | lincRNA,ant  | 77661;78973   | intergenic    | RPL5P24_Y_RNA         | +,+     | pseudogene   | 18173;8039    |
| 3463 | chr20 | 20720371 | - | chr9  | 19671058  | + | N | N | N | Y | N | transl_inter | na | NA | upstream      | RN7SL607P            | -       | misc_RNA     | 0             | intronic      | SLC24A2               | -       | protein_cod  | 0             |
| 3464 | chr20 | 54384170 | - | chrX  | 854387895 | - | N | N | Y | Y | N | transl_inter | na | NA | intergenic    | RP5-1010E17.1,CBLN   | +,+     | lincRNA,pro  | 299418;188326 | intergenic    | RP11-143H17.1,VBP1    | +,+     | pseudogene   | 3117;37389    |
| 3465 | chr20 | 11281584 | - | chrX  | 81651235  | + | Y | N | Y | N | N | transl_inter | na | NA | ncRNA_intr    | RP4-734C18.1         | -       | lincRNA      | 0             | intergenic;ir | RNU6-974P,RP4-581F12  | +,+     | snRNA,pse    | 394459;101883 |
| 3466 | chr20 | 18562243 | - | chrX  | 815692595 | + | Y | N | N | N | N | transl_inter | na | NA | intergenic    | LINC00493.DTD1       | +,+     | lincRNA,pro  | 12036;6294    | intergenic    | KRT8P8,GABRQ          | +,+     | pseudogene   | 43099;114042  |
| 3467 | chr20 | 11281584 | + | chrX  | 81651235  | + | Y | N | Y | N | N | transl_inter | na | NA | ncRNA_intr    | RP4-734C18.1         | -       | lincRNA      | 0             | intergenic;ir | RNU6-974P,RP4-581F12  | +,+     | snRNA,pse    | 394459;101883 |
| 3468 | chr20 | 18689348 | + | chrX  | 86280019  | + | N | N | N | Y | N | transl_inter | na | NA | intronic      | DTD1                 | +       | protein_cod  | 0             | intergenic    | RP3-431C21.1,RP11-192 | +,+     | pseudogene   | 136200;118838 |
| 3469 | chr20 | 18689482 | + | chrX  | 86280080  | + | Y | N | N | N | N | transl_inter | na | NA | intronic      | DTD1                 | +       | protein_cod  | 0             | intergenic    | RP3-431C21.1,RP11-192 | +,+     | pseudogene   | 136261;18777  |
| 3470 | chr20 | 26188767 | - | chrY  | 10034159  | + | Y | N | Y | Y | N | transl_inter | na | NA | ncRNA_intr    | MIR663A              | -       | processed_   | 0             | downstream    | AC010970.1            | +       | miRNA        | 0             |
| 3471 | chr21 | 11022748 | - | chr22 | 45991517  | + | Y | N | N | Y | N | transl_inter | na | NA | ncRNA_intr    | BAGE2                | -       | pseudogene   | 0             | intronic;intr | FBLN1                 | +       | protein_cod  | 0             |
| 3472 | chr21 | 11022748 | + | chr22 | 45991517  | - | Y | N | N | Y | N | transl_inter | na | NA | ncRNA_intr    | BAGE2                | -       | pseudogene   | 0             | intronic;intr | FBLN1                 | +       | protein_cod  | 0             |
| 3473 | chr21 | 30382776 | - | chr3  | 119431791 | - | N | N | N | Y | N | transl_inter | na | NA | intronic      | RWDD2B               | -       | protein_cod  | 0             | intronic      | MAATS1                | +       | protein_cod  | 0             |
| 3474 | chr21 | 11152404 | + | chr4  | 183542724 | + | N | N | N | Y | N | transl_inter | na | NA | intergenic    | BAGE2,VN1R7P         | +,+     | pseudogene   | 53424;1433    | intronic      | TENM3                 | +       | protein_cod  | 0             |
| 3475 | chr21 | 30050011 | - | chr5  | 123549613 | - | Y | N | N | N | N | transl_inter | na | NA | intergenic    | AF131217.1,RNU6-87;  | +,+     | lincRNA,snf  | 2841;65519    | intergenic    | KRT18P16,HMGB1P29     | +,+     | pseudogene   | 576516;6659   |
| 3476 | chr21 | 19093229 | - | chr5  | 167286073 | + | N | N | N | N | Y | transl_inter | na | NA | intergenic    | AP000432.2,C21orf91- | -,-     | lincRNA,linc | 60527;42403   | intronic      | TENM2                 | +       | protein_cod  | 0             |
| 3477 | chr21 | 11067249 | - | chr7  | 151979931 | - | Y | Y | N | Y | Y | transl_inter | na | NA | ncRNA_intr    | BAGE2                | -       | pseudogene   | 0             | intronic      | KMT2C                 | -       | protein_cod  | 0             |
| 3478 | chr21 | 11067283 | - | chr7  | 151979987 | - | N | N | N | Y | N | transl_inter | na | NA | ncRNA_intr    | BAGE2                | -       | pseudogene   | 0             | intronic;intr | KMT2C                 | -       | protein_cod  | 0             |
| 3479 | chr21 | 23546941 | + | chr7  | 75642667  | - | N | N | N | N | Y | transl_inter | na | NA | intergenic    | AP000705.6,RNU4-45I  | +,+     | pseudogene   | 20322;30570   | intronic      | STYXL1                | -       | protein_cod  | 0             |
| 3480 | chr21 | 11067283 | + | chr7  | 151979987 | + | Y | Y | Y | N | Y | transl_inter | na | NA | ncRNA_intr    | BAGE2                | -       | pseudogene   | 0             | intronic;intr | KMT2C                 | -       | protein_cod  | 0             |
| 3481 | chr21 | 11097503 | + | chr7  | 152099150 | + | Y | N | N | N | N | transl_inter | na | NA | ncRNA_intr    | BAGE2                | -       | pseudogene   | 0             | intronic      | KMT2C                 | -       | protein_cod  | 0             |
| 3482 | chr21 | 25300215 | + | chr7  | 71318612  | + | N | N | N | N | Y | transl_inter | na | NA | intergenic    | AP000474.1,AP00047;  | +,+     | lincRNA,linc | 37358;33005   | intronic      | CALN1                 | -       | protein_cod  | 0             |
| 3483 | chr21 | 24191239 | - | chr8  | 141500799 | - | N | N | Y | N | N | transl_inter | na | NA | intergenic    | RN7SL609P,AP00094    | +,+     | misc_RNA,i   | 137953;63664  | intergenic    | TRAPPC9,CTA-204B4.2   | +,+     | protein_cod  | 32121;15113   |
| 3484 | chr21 | 24191502 | - | chr8  | 141500934 | - | N | N | Y | N | N | transl_inter | na | NA | intergenic    | RN7SL609P,AP00094    | +,+     | misc_RNA,i   | 138216;63401  | intergenic    | TRAPPC9,CTA-204B4.2   | +,+     | protein_cod  | 32256;14978   |
| 3485 | chr21 | 24191877 | - | chr8  | 141500916 | - | N | N | N | Y | N | transl_inter | na | NA | intergenic    | RN7SL609P,AP00094    | +,+     | misc_RNA,i   | 138591;63026  | intergenic    | TRAPPC9,CTA-204B4.2   | +,+     | protein_cod  | 32238;14996   |
| 3486 | chr21 | 43250843 | - | chr8  | 20479605  | - | N | Y | Y | N | Y | transl_inter | na | NA | intronic      | PRDM15               | -       | protein_cod  | 0             | intergenic    | U3,RP11-108E14.1      | +,+     | snRNA,linc   | 7168;33597    |
| 3487 | chr21 | 18553568 | - | chr8  | 64238092  | + | N | N | N | N | Y | transl_inter | na | NA | intergenic    | AF121831.2,NEK4P1    | +,+     | lincRNA,pse  | 307557;29219  | intergenic    | RN7SL135P,CTD-3046C   | +,+     | misc_RNA,i   | 90623;59305   |
| 3488 | chr21 | 18553575 | - | chr8  | 64238060  | + | N | N | Y | Y | N | transl_inter | na | NA | intergenic;in | AF121831.2,NEK4P1    | +,+     | lincRNA,pse  | 307564;29212  | intergenic    | RN7SL135P,CTD-3046C   | +,+     | misc_RNA,i   | 90591;59337   |
| 3489 | chr21 | 42458069 | + | chr8  | 107246401 | + | N | Y | Y | N | N | transl_inter | na | NA | intergenic    | YRDCP3,LINC00323     | +,+     | pseudogene   | 221670;55358  | intergenic    | SLC16A14P1,RP11-778L  | +,+     | pseudogene   | 16955;31262   |
| 3490 | chr21 | 10804586 | - | chrY  | 28813711  | + | N | N | Y | Y | N | transl_inter | na | NA | intergenic    | bP-21201H5.1,IGHV1C  | +,+     | pseudogene   | 328525;58036  | intergenic    | PARP4P1,NONE          | -,-NONE | pseudogene   | 32912;NONE    |
| 3491 | chr21 | 11054315 | - | chrY  | 59001011  | + | Y | Y | Y | Y | Y | transl_inter | na | NA | ncRNA_intr    | BAGE2                | -       | pseudogene   | 0             | upstream      | CTBP2P1               | +       | pseudogene   | 0             |
| 3492 | chr22 | 17500831 | + | chr4  | 183542903 | + | N | N | N | N | Y | transl_inter | na | NA | intergenic    | AC006548.26,CECR7    | +,+     | pseudogene   | 7009;16629    | intronic      | TENM3                 | +       | protein_cod  | 0             |
| 3493 | chr22 | 31751806 | - | chr6  | 131678295 | + | N | Y | Y | N | Y | transl_inter | na | NA | intergenic    | AC005003.1,RNU6-33   | +,+     | protein_cod  | 7136;32913    | intergenic    | AKAP7_RPL21P67        | +,+     | protein_cod  | 73620;111904  |
| 3494 | chr22 | 20324158 | + | chr6  | 90002554  | - | N | N | N | N | Y | transl_inter | na | NA | intergenic    | XXbac-B444P24.14,XO  | +,+     | lincRNA,ant  | 15432;2170    | intronic      | GABRR2                | -       | protein_cod  | 0             |
| 3495 | chr22 | 20324278 | + | chr6  | 90002539  | - | N | N | N | N | Y | transl_inter | na | NA | intergenic    | XXbac-B444P24.14,XO  | +,+     | lincRNA,ant  | 15552;2050    | intronic      | GABRR2                | -       | protein_cod  | 0             |
| 3496 | chr22 | 39608025 | - | chr7  | 137485122 | - | N | Y | N | N | N | transl_inter | na | NA | intergenic    | FUNDQ2P4,PDGFB       | +,+     | pseudogene   | 56075;11339   | intronic      | DGKI                  | -       | protein_cod  | 0             |
| 3497 | chr22 | 39608426 | - | chr7  | 137485141 | - | N | Y | N | N | N | transl_inter | na | NA | intergenic    | FUNDQ2P4,PDGFB       | +,+     | pseudogene   | 56478;10938   | intronic      | DGKI                  | -       | protein_cod  | 0             |
| 3498 | chr22 | 24077834 | - | chr7  | 83929121  | + | N | N | N | Y | Y | transl_inter | na | NA |               |                      |         |              |               |               |                       |         |              |               |

|      |      |           |   |      |           |   |   |   |   |   |   |              |    |    |                 |                      |        |              |               |                 |                        |        |               |               |
|------|------|-----------|---|------|-----------|---|---|---|---|---|---|--------------|----|----|-----------------|----------------------|--------|--------------|---------------|-----------------|------------------------|--------|---------------|---------------|
| 3523 | chr3 | 83756625  | - | chr7 | 17157068  | - | Y | N | N | Y | N | transl_inter | na | NA | intergenic      | CYP51A1P1,SRRM1P     | -,-    | pseudogene   | 899453;229571 | intergenic      | AC098592.8,AC003075.4  | -,-    | pseudogene    | 83966;162390  |
| 3524 | chr3 | 83756711  | - | chr7 | 17157013  | - | N | Y | N | N | N | transl_inter | na | NA | intergenic      | CYP51A1P1,SRRM1P     | -,-    | pseudogene   | 899539;229485 | intergenic      | AC098592.8,AC003075.4  | -,-    | pseudogene    | 83911;162445  |
| 3525 | chr3 | 169203729 | - | chr7 | 9055327   | - | N | N | N | N | N | transl_inter | na | NA | intronic        | MECOM                | -      | protein_cod  | 0             | intergenic      | AC009500.2,RP4-668E1   | +,+    | pseudogene    | 76328;68325   |
| 3526 | chr3 | 104163408 | + | chr7 | 24437016  | - | N | N | N | N | Y | transl_inter | na | NA | intergenic      | RP11-40M23.1,RP11-2  | +,+    | pseudogene   | 380982;58136  | intergenic      | NPY,RNU6-1103P         | +,+    | protein_cod   | 105532;139395 |
| 3527 | chr3 | 104163474 | + | chr7 | 24436814  | - | N | N | N | N | Y | transl_inter | na | NA | intergenic      | RP11-40M23.1,RP11-2  | +,+    | pseudogene   | 381048;58070  | intergenic      | NPY,RNU6-1103P         | +,+    | protein_cod   | 105330;140137 |
| 3528 | chr3 | 2747421   | + | chr7 | 113682926 | + | N | N | Y | N | N | transl_inter | na | NA | intronic        | CNTNA2               | +,+    | protein_cod  | 0             | intronic        | PPP1R3A                | -      | protein_cod   | 0             |
| 3529 | chr3 | 80590176  | + | chr7 | 96475902  | + | N | Y | Y | Y | Y | transl_inter | na | NA | intergenic;intr | RP11-481N16.1,RP11-1 | +,+    | pseudogene   | 98721;220017  | intergenic      | SHFM1,MARK2P10         | -      | protein_cod   | 136699;11592  |
| 3530 | chr3 | 119478564 | + | chr7 | 146035843 | + | N | N | N | N | Y | transl_inter | na | NA | intronic        | MAATS1               | +      | protein_cod  | 0             | intronic;intr   | CNTNA2P2               | +      | protein_cod   | 0             |
| 3531 | chr3 | 165132343 | - | chr8 | 25463341  | - | N | N | N | N | Y | transl_inter | na | NA | ncRNA_intrn     | RP11-85M11.2         | +      | lincRNA      | 0             | intergenic      | CDCA2,RP11-219J21.1    | +,+    | protein_cod   | 97905;79973   |
| 3532 | chr3 | 111274086 | - | chr8 | 128533830 | + | Y | Y | Y | Y | Y | transl_inter | na | NA | intronic        | C096                 | +      | protein_cod  | 0             | intergenic      | CASC8,CASC11           | +,+    | antisense,lir | 39446;164758  |
| 3533 | chr3 | 10266852  | + | chr8 | 33898508  | + | N | Y | N | N | N | transl_inter | na | NA | intronic        | IRAK2                | +      | protein_cod  | 0             | intergenic      | RP11-317N12.1,RP11-43  | +,+    | lincRNA,linc  | 1982;133896   |
| 3534 | chr3 | 137221705 | - | chr9 | 2397101   | - | Y | Y | N | Y | Y | transl_inter | na | NA | intergenic      | IL20RB,RNA5SP142     | +,+    | protein_cod  | 491778;15271  | intergenic      | RN7SL592P,RP11-125B2   | -,-    | misc_RNA,i    | 167860;25601  |
| 3535 | chr3 | 137221811 | - | chr9 | 2397149   | - | N | Y | N | Y | N | transl_inter | na | NA | intergenic      | IL20RB,RNA5SP142     | +,+    | protein_cod  | 491884;15165  | intergenic      | RN7SL592P,RP11-125B2   | -,-    | misc_RNA,i    | 167908;25553  |
| 3536 | chr3 | 144734889 | - | chr9 | 98993629  | + | N | N | Y | N | N | transl_inter | na | NA | intergenic      | RNA5SP144,RP11-622   | +,+    | rRNA,pseuc   | 829027;506436 | intergenic      | EIF4BP3,HSD17B3        | +,+    | pseudogene    | 83491;3959    |
| 3537 | chr3 | 73160814  | + | chr9 | 99002312  | - | N | Y | N | N | N | transl_inter | na | NA | downstream      | RNU2-64P             | +      | snRNA        | 0             | intronic        | HSD17B3                | -      | protein_cod   | 0             |
| 3538 | chr3 | 35150723  | + | chr9 | 103742576 | + | N | N | N | N | Y | transl_inter | na | NA | intergenic      | RNU6-243P,ARPP21     | +,+    | snRNA,prot   | 212285;169714 | intergenic      | GAPDHP26,LPPR1         | +,+    | pseudogene    | 3612;48415    |
| 3539 | chr3 | 80590176  | + | chr9 | 12556850  | + | Y | N | N | N | Y | transl_inter | na | NA | intergenic;intr | RP11-481N16.1,RP11-1 | +,+    | pseudogene   | 98721;220017  | intergenic      | RNU2-47P,TYRP1         | -,-    | snRNA,prot    | 256399;128589 |
| 3540 | chr3 | 83756629  | - | chrX | 45672668  | - | N | Y | N | N | N | transl_inter | na | NA | intergenic      | CYP51A1P1,SRRM1P     | -,-    | pseudogene   | 899457;229567 | intergenic      | RP6-99M1.2,RP5-1158E   | -,-    | lincRNA,linc  | 42991;34660   |
| 3541 | chr3 | 178286522 | - | chrX | 3233474   | - | N | Y | N | N | N | transl_inter | na | NA | ncRNA_intrn     | RP11-385J1.2         | -      | antisense    | 0             | intronic        | MXRA5                  | -      | protein_cod   | 0             |
| 3542 | chr3 | 150537184 | - | chrX | 26922363  | + | N | Y | N | N | N | transl_inter | na | NA | intergenic      | SLAH2,CLRN1-AS1      | +,+    | protein_cod  | 55966;33087   | intergenic      | RNU1-142P,RP11-268G1   | +,+    | snRNA,lincf   | 113960;138661 |
| 3543 | chr3 | 66335898  | + | chrX | 92720808  | - | Y | Y | N | Y | Y | transl_inter | na | NA | intronic        | SLC25A26             | +      | protein_cod  | 0             | intergenic      | RP13-75G22.1,RP13-13C  | +,+    | pseudogene    | 44920;22868   |
| 3544 | chr3 | 174514510 | + | chrX | 97221559  | + | Y | N | N | Y | N | transl_inter | na | NA | intronic        | NAALADL2             | +      | protein_cod  | 0             | intergenic      | RP13-75G22.1,RP13-13C  | +,+    | pseudogene    | 58471;9317    |
| 3545 | chr3 | 16409885  | + | chrY | 7588542   | + | Y | N | Y | N | Y | transl_inter | na | NA | intronic;intr   | RFTN1                | +      | protein_cod  | 0             | ncRNA_intrn     | RFTN1P1                | -      | pseudogene    | 0             |
| 3546 | chr4 | 177134027 | + | chr5 | 51826922  | + | Y | N | N | N | N | transl_inter | na | NA | downstream      | ASB5                 | +      | protein_cod  | 0             | intergenic;intr | RPS17P11,CTD-2141G3    | +,+    | pseudogene    | 248229;48467  |
| 3547 | chr4 | 75641494  | - | chr6 | 98652131  | - | Y | Y | Y | Y | Y | transl_inter | na | NA | intergenic      | AC142293.3,BTC       | -,-    | antisense,p  | 126830;28475  | ncRNA_intrn     | RP11-436D23.1          | +,+    | lincRNA       | 0             |
| 3548 | chr4 | 157768894 | - | chr6 | 15570788  | + | N | N | Y | N | N | transl_inter | na | NA | intronic        | PDGFC                | -      | protein_cod  | 0             | intergenic      | RP1-257I9.2,NOX3       | -,-    | lincRNA,prc   | 5531;8656     |
| 3549 | chr4 | 179198312 | - | chr6 | 142378771 | + | N | Y | N | N | N | transl_inter | na | NA | intergenic      | RNU1-45P,RP11-84H6   | +,+    | snRNA,pse    | 160297;9537   | intergenic      | RPS3AP23,RP11-137J7    | +,+    | pseudogene    | 421131;5083   |
| 3550 | chr4 | 17119072  | + | chr6 | 57604993  | - | Y | Y | N | N | N | transl_inter | na | NA | ncRNA_intrn     | RP11-281P23.2        | +,+    | lincRNA      | 0             | intergenic      | PRIM2,GAPDHP41         | +,+    | protein_cod   | 91618;81976   |
| 3551 | chr4 | 68150856  | + | chr6 | 160656412 | - | Y | Y | N | Y | Y | transl_inter | na | NA | intergenic      | RNU6-699P,RP11-584I  | +,+    | snRNA,lincf  | 387767;132167 | intronic        | SLC22A2                | -      | protein_cod   | 0             |
| 3552 | chr4 | 6005888   | - | chr7 | 48233675  | - | N | N | N | N | Y | transl_inter | na | NA | intergenic      | C4orf50,JAKMIP1      | +,+    | protein_cod  | 14343;22038   | intronic        | ABCA13                 | +      | protein_cod   | 0             |
| 3553 | chr4 | 9704831   | - | chr7 | 20709422  | - | N | Y | N | N | N | transl_inter | na | NA | downstream      | FAM86MP,ALG1L3P      | +,+    | pseudogene   | 0             | intronic        | ABCB5                  | +      | protein_cod   | 0             |
| 3554 | chr4 | 33837031  | - | chr7 | 57608334  | - | N | N | N | N | Y | transl_inter | na | NA | ncRNA_intrn     | RP11-79E3.3          | -      | lincRNA      | 0             | intergenic      | RP11-1324A7.2,NCOR1f   | +,+    | pseudogene    | 62733;51166   |
| 3555 | chr4 | 33843475  | - | chr7 | 57613466  | - | N | Y | N | N | N | transl_inter | na | NA | ncRNA_intrn     | RP11-79E3.3          | -      | lincRNA      | 0             | intergenic      | RP11-1324A7.2,NCOR1f   | +,+    | pseudogene    | 67865;46034   |
| 3556 | chr4 | 39350031  | - | chr7 | 28150150  | - | N | Y | N | Y | Y | transl_inter | na | NA | intronic        | RFC1                 | -      | protein_cod  | 0             | intronic        | JAZF1                  | -      | protein_cod   | 0             |
| 3557 | chr4 | 88843882  | - | chr7 | 83909042  | - | N | Y | N | N | N | transl_inter | na | NA | intergenic      | HSP90AB3P,SPP1       | +,+    | pseudogene   | 28715;52937   | intronic        | SEMA3E                 | -      | protein_cod   | 0             |
| 3558 | chr4 | 175884836 | - | chr7 | 62473459  | - | N | Y | Y | Y | Y | transl_inter | na | NA | intronic        | ADAM29               | +      | protein_cod  | 0             | intergenic      | RNU6-417P,RP11-196D1   | +,+    | snRNA,lincf   | 1512;31746    |
| 3559 | chr4 | 191043572 | - | chr7 | 159112873 | - | N | N | N | Y | N | transl_inter | na | NA | intergenic      | DUXAL2,NONE          | +,NONE | protein_cod  | 29853;NONE    | intergenic      | PIP5K1P2,NONE          | +,NONE | pseudogene    | 102604;NONE   |
| 3560 | chr4 | 115442436 | - | chr7 | 15394023  | + | N | Y | N | N | Y | transl_inter | na | NA | intergenic      | RP11-362M19.1,UGT8   | +,+    | pseudogene   | 417055;77175  | intronic        | AGMO                   | -      | protein_cod   | 0             |
| 3561 | chr4 | 66955034  | + | chr7 | 136260958 | + | Y | N | N | N | N | transl_inter | na | NA | ncRNA_intrn     | RP11-25H12.1         | +      | lincRNA      | 0             | intergenic      | AC009541.1,hsa-mir-490 | +,+    | pseudogene    | 87893;109348  |
| 3562 | chr4 | 109844627 | + | chr7 | 76044147  | + | Y | Y | Y | Y | Y | transl_inter | na | NA | intronic        | COL25A1              | +      | protein_cod  | 0             | intronic        | ZP3                    | +      | protein_cod   | 0             |
| 3563 | chr4 | 191027672 | - | chr8 | 146253608 | - | N | N | N | N | Y | transl_inter | na | NA | intergenic;intr | DUXAL2,NONE          | +,NONE | protein_cod  | 13953;NONE    | intergenic;intr | ZNF252P-AS1,AC13910    | +,+    | antisense,p   | 22176;19638   |
| 3564 | chr4 | 191027811 | - | chr8 | 146253477 | - | N | N | N | Y | N | transl_inter | na | NA | intergenic;intr | DUXAL2,NONE          | +,NONE | protein_cod  | 14092;NONE    | intergenic;intr | ZNF252P-AS1,AC13910    | +,+    | antisense,p   | 22045;19769   |
| 3565 | chr4 | 191043760 | - | chr8 | 146230855 | - | Y | N | N | N | Y | transl_inter | na | NA | intergenic;intr | DUXAL2,NONE          | +,NONE | protein_cod  | 30041;NONE    | intergenic;intr | C8orf33,NONE           | +,NONE | protein_cod   | 19439;NONE    |
| 3566 | chr4 | 177613256 | - | chr8 | 73065385  | + | N | Y | Y | Y | N | transl_inter | na | NA | ncRNA_intrn     | RP11-313E19.2        | +      | antisense    | 0             | intergenic      | TRPA1,RP11-142A23.1    | -,-    | protein_cod   | 77533;43184   |
| 3567 | chr4 | 95990463  | + | chr8 | 5224791   | + | Y | Y | N | Y | Y | transl_inter | na | NA | intronic;intr   | BCMPR1B              | +      | protein_cod  | 0             | intergenic;intr | RN7SL318P,RP11-745Kf   | +,+    | misc_RNA,i    | 224562;87949  |
| 3568 | chr4 | 191027672 | + | chr8 | 146253608 | + | N | Y | N | Y | N | transl_inter | na | NA | intergenic;intr | DUXAL2,NONE          | +,NONE | protein_cod  | 13953;NONE    | intergenic;intr | ZNF252P-AS1,AC13910    | +,+    | antisense,p   | 22176;19638   |
| 3569 | chr4 | 159355363 | - | chr9 | 18714806  | - | N | N | N | Y | N | transl_inter | na | NA | intronic        | RXFP1                | +      | protein_cod  | 0             | intronic        | ADAMTSL1               | -      | protein_cod   | 0             |
| 3570 | chr4 | 171598998 | - | chr9 | 109550767 | - | Y | N | N | N | N | transl_inter | na | NA | intergenic      | HSP90AA6P,RP11-322   | -,-    | pseudogene   | 72397;64622   | intergenic      | RP11-308N19.5,RNA5SF   | +,+    | pseudogene    | 65556;55263   |
| 3571 | chr4 | 171599195 | - | chr9 | 109550767 | - | N | N | N | N | Y | transl_inter | na | NA | intergenic      | HSP90AA6P,RP11-322   | -,-    | pseudogene   | 72594;64425   | intergenic      | RP11-308N19.5,RNA5SF   | +,+    | pseudogene    | 65665;55154   |
| 3572 | chr4 | 190194847 | - | chr9 | 68420017  | - | N | N | N | Y | N | transl_inter | na | NA | intergenic      | RP11-706F1.1,RP11-7  | +,+    | lincRNA,linc | 68816;14984   | intergenic      | MIR4477A,RP11-764K9.4  | +,+    | miRNA,pse     | 4629;7844     |
| 3573 | chr4 | 190197862 | - | chr9 | 68424607  | - | N | N | Y | N | N | transl_inter | na | NA | intergenic      | RP11-706F1.1,RP11-7  | +,+    | lincRNA,linc | 71851;11949   | intergenic      | MIR4477A,RP11-764K9.4  | +,+    | miRNA,pse     | 9219;3254     |
| 3574 | chr4 | 190197983 | - | chr9 | 68424688  | - | N | N | Y | N | N | transl_inter | na | NA | intergenic      | RP11-706F1.1,RP11-7  | +,+    | lincRNA,linc | 71952;11848   | intergenic      | MIR4477A,RP11-764K9.4  | +,+    | miRNA,pse     | 9300;3173     |
| 3575 | chr4 | 190200118 | - | chr9 | 68425910  | - | N | N | N | N | Y | transl_inter | na | NA | intergenic      | RP11-706F1.1,RP11-7  | +,+    | lincRNA,linc | 74087;9713    | intergenic      | MIR4477A,RP11-764K9.4  | +,+    | miRNA,pse     | 10522;1951    |
| 3576 | chr4 | 14776617  | + | chr9 | 76898393  | - | Y | Y | N | Y | Y | transl_inter | na | NA | ncRNA_intrn     | LINC00504            | -      | lincRNA      | 0             | intergenic      | RP11-401G5.1,RP11-171  | +,+    | pseudogene    | 410180;88054  |
| 3577 | chr4 | 190819465 | + | chr9 | 68491996  | - | N | N | Y | N | N | transl_inter | na | NA | ncRNA_intrn     | AF146191.4           | -      | lincRNA      | 0             | intergenic      | RP11-764K9.4,CR78658   | +,+    | pseudogene    | 36621;20350   |
| 3578 | chr4 | 171599149 | + | chr9 | 109550927 | + | N | Y | N | N | N | transl_inter | na | NA | intergenic      | HSP90AA6P,RP11-322   | -,-    | pseudogene   | 72548;64471   | intergenic      | RP11-308N19.5,RNA5SF   | +,+    | pseudogene    | 65716;55103   |
| 3579 | chr4 | 48240980  | - | chrX | 143557292 | + | N | Y | N | N | N | transl_inter | na | NA | intronic        | TSC                  | -      | protein_cod  | 0             | intergenic      | RRM2P4,HNRNP10         | +,+    | pseudogene    | 164474;365006 |
| 3580 | chr4 | 171010218 | + | chrX | 76853682  | - | N | N | Y | N | N | transl_inter | na | NA | intronic        | AADAT                | -      | protein_cod  | 0             | intergenic      | BX68235.1,FGF16        | +,+    | pseudogene    | 51910;55956   |
| 3581 | chr4 | 17119073  | + | chrX | 14455922  | + | Y | Y | N | Y | Y | transl_inter | na | NA | ncRNA_intrn     | RP11-281P23.2        | +      | lincRNA      | 0             | intergenic      | GS1-257G1.1,GLRA2      | +,+    | pseudogene    | 192378;       |

|      |      |           |   |      |           |   |   |   |   |   |   |              |    |    |                |                      |   |              |              |               |                       |   |              |               |
|------|------|-----------|---|------|-----------|---|---|---|---|---|---|--------------|----|----|----------------|----------------------|---|--------------|--------------|---------------|-----------------------|---|--------------|---------------|
| 3607 | chr5 | 91686129  | - | chrX | 95087573  | - | N | N | N | Y | N | transl_inter | na | NA | ncRNA_intrn    | RP11-348J2.2         | + | lincRNA      | 0            | intergenic    | RP11-471G13.5,RP5-961 | + | pseudogene   | 111430;140754 |
| 3608 | chr5 | 131452633 | - | chrX | 75379508  | - | N | N | N | Y | N | transl_inter | na | NA | intergenic     | sno26,AC063976.1     | + | snoRNA,ps    | 36807;30551  | intergenic    | RP3-481A17.1,PBDC1    | + | pseudogene   | 129343;13263  |
| 3609 | chr5 | 91635949  | + | chrX | 51714511  | - | N | N | Y | Y | N | transl_inter | na | NA | ncRNA_intrn    | RP11-348J2.2         | + | lincRNA      | 0            | intergenic    | RP11-234P3.4,TPMTP3   | + | pseudogene   | 47675;7808    |
| 3610 | chr5 | 174058012 | + | chrX | 126744477 | - | Y | Y | Y | Y | N | transl_inter | na | NA | intergenic     | RP11-267A15.3,HIGD1  | + | lincRNA,ps   | 5234;1923    | intergenic    | RP3-428A13.1,CTD-207f | + | pseudogene   | 217969;50135  |
| 3611 | chr5 | 153327690 | + | chrX | 121274244 | + | N | N | N | Y | N | transl_inter | na | NA | intergenic     | RP11-461L18.1,FAM11  | + | lincRNA,pro  | 44907;41998  | intergenic    | RP11-417D4.1,AL51348f | + | pseudogene   | 128779;331334 |
| 3612 | chr6 | 114862579 | - | chr7 | 80672613  | + | N | N | Y | N | N | transl_inter | na | NA | intergenic     | RP3-399L15.2,RNU6-4  | + | lincRNA,snf  | 5540;325458  | intergenic    | SEMA3C,AC005008.2     | + | protein_cod  | 120938;132211 |
| 3613 | chr6 | 144120424 | - | chr7 | 153002532 | + | Y | N | N | N | N | transl_inter | na | NA | intronic       | PHACTR2              | + | protein_cod  | 0            | intergenic    | AC079809.2,AC073236.3 | + | pseudogene   | 160859;94473  |
| 3614 | chr6 | 144120502 | - | chr7 | 153002548 | + | N | N | Y | N | N | transl_inter | na | NA | intronic       | PHACTR2              | + | protein_cod  | 0            | intergenic    | AC079809.2,AC073236.3 | + | pseudogene   | 160785;94547  |
| 3615 | chr6 | 13947500  | + | chr7 | 46567002  | - | N | Y | N | Y | Y | transl_inter | na | NA | intronic       | RNF182               | + | protein_cod  | 0            | intergenic    | AC004869.2,HMGN1P19   | + | lincRNA,ps   | 45826;107210  |
| 3616 | chr6 | 13947936  | + | chr7 | 46567443  | - | N | N | Y | Y | N | transl_inter | na | NA | intronic       | RNF182               | + | protein_cod  | 0            | intergenic    | AC004869.2,HMGN1P19   | + | lincRNA,ps   | 46267;106769  |
| 3617 | chr6 | 47396994  | + | chr7 | 130372012 | - | N | N | Y | Y | N | transl_inter | na | NA | intergenic     | RP11-157D6.1,AL3553  | + | pseudogene   | 60028;33593  | UTR5          | TSGA13                | - | protein_cod  | 0             |
| 3618 | chr6 | 144120748 | + | chr7 | 153002102 | - | N | N | Y | Y | N | transl_inter | na | NA | intronic       | PHACTR2              | + | protein_cod  | 0            | intergenic    | AC079809.2,AC073236.3 | + | pseudogene   | 160429;94903  |
| 3619 | chr6 | 167365347 | + | chr7 | 142014574 | - | N | Y | Y | Y | N | transl_inter | na | NA | intronic       | RNASET2,RP11-5140    | + | protein_cod  | 0            | intergenic;ir | TRBV4-1,TRBV5-1       | + | TR_V_gene    | 1085;5922     |
| 3620 | chr6 | 24812046  | + | chr7 | 93146611  | + | N | N | Y | Y | N | transl_inter | na | NA | intronic       | FAM65B               | - | protein_cod  | 0            | intronic      | CALCR                 | - | protein_cod  | 0             |
| 3621 | chr6 | 36003386  | + | chr7 | 124879111 | + | Y | Y | Y | N | Y | transl_inter | na | NA | intronic       | MAPK14               | + | protein_cod  | 0            | ncRNA_intrn   | RP11-3B12.3,RP11-3B12 | + | lincRNA,linc | 0             |
| 3622 | chr6 | 129706247 | + | chr7 | 71888533  | + | Y | N | Y | N | N | transl_inter | na | NA | intronic       | LAMA2                | + | protein_cod  | 0            | intronic      | CALN1                 | - | protein_cod  | 0             |
| 3623 | chr6 | 150353710 | + | chr7 | 7062416   | + | N | N | N | N | Y | transl_inter | na | NA | upstream       | RAET1M               | + | pseudogene   | 0            | intergenic    | AC079804.1,AC092104.2 | + | miRNA,miR    | 27467;43826   |
| 3624 | chr6 | 160640135 | + | chr7 | 114270067 | + | Y | N | N | N | N | transl_inter | na | NA | intronic       | SLC22A2              | - | protein_cod  | 0            | intronic      | FOXP2                 | + | protein_cod  | 0             |
| 3625 | chr6 | 43962298  | - | chr8 | 14365895  | - | N | N | Y | Y | N | transl_inter | na | NA | intergenic     | RP11-344J7.2,RP5-11  | - | lincRNA,ant  | 142228;1162  | intronic      | SGCZ                  | - | protein_cod  | 0             |
| 3626 | chr6 | 118142597 | - | chr8 | 141361286 | - | N | Y | Y | Y | N | transl_inter | na | NA | intergenic     | NUS1,SLC35F1         | + | protein_cod  | 110794;86092 | intronic      | TRAPPC9               | - | protein_cod  | 0             |
| 3627 | chr6 | 132467953 | - | chr8 | 116410955 | - | N | N | Y | Y | N | transl_inter | na | NA | ncRNA_exo      | LINC01013            | + | lincRNA      | 0            | intergenic;ir | RP11-192P9.1,TRPS1    | - | pseudogene   | 606797;9769   |
| 3628 | chr6 | 153748709 | - | chr8 | 5656494   | - | N | N | N | Y | N | transl_inter | na | NA | intergenic     | RNASP225,RP11-33'    | + | rRNA,pseu    | 7002;238133  | intergenic    | RP11-281H1.1,RP11-72  | + | lincRNA,ps   | 128895;49725  |
| 3629 | chr6 | 57603490  | + | chr8 | 71720588  | + | N | N | N | N | Y | transl_inter | na | NA | intergenic     | PRIM2,GAPDHP41       | + | protein_cod  | 90115;83479  | intergenic    | Y_RNA,RP11-326E22.1   | + | misc_RNA,i   | 27345;347104  |
| 3630 | chr6 | 27759148  | + | chr8 | 73959115  | + | Y | Y | Y | Y | Y | transl_inter | na | NA | intergenic     | RSL24D1P1,HIST1H4I   | + | pseudogene   | 10258;15705  | UTR3          | TERF1                 | - | protein_cod  | 0             |
| 3631 | chr6 | 43962452  | + | chr8 | 14835894  | + | N | N | N | Y | N | transl_inter | na | NA | intergenic     | RP11-344J7.2,RP5-11' | - | lincRNA,ant  | 142382;1008  | intronic      | SGCZ                  | + | protein_cod  | 0             |
| 3632 | chr6 | 110181726 | + | chr8 | 146184564 | + | N | Y | N | N | N | transl_inter | na | NA | intergenic     | RP11-249J4.2,GPR6    | + | lincRNA,pro  | 31738;117788 | intergenic    | ZNF16,ZNF252P         | - | protein_cod  | 8290;14411    |
| 3633 | chr6 | 132467953 | + | chr8 | 116410955 | + | N | Y | Y | Y | Y | transl_inter | na | NA | ncRNA_exo      | LINC01013            | + | lincRNA      | 0            | intergenic;ir | RP11-192P9.1,TRPS1    | - | pseudogene   | 606797;9769   |
| 3634 | chr6 | 13128406  | + | chr9 | 21841794  | - | Y | Y | Y | Y | Y | transl_inter | na | NA | intronic       | PHACTR1              | + | protein_cod  | 0            | intronic      | MTAP,RP11-145E5.5     | + | protein_cod  | 0             |
| 3635 | chr6 | 152217773 | + | chr9 | 97340216  | + | N | N | N | Y | N | transl_inter | na | NA | intronic       | ESR1                 | + | protein_cod  | 0            | intronic      | FBP2                  | - | protein_cod  | 0             |
| 3636 | chr6 | 89435091  | - | chrX | 119277813 | - | Y | N | N | N | N | transl_inter | na | NA | intronic       | RNGTT                | - | protein_cod  | 0            | ncRNA_intrn   | NKAPP1,RP4-755D9.1    | + | pseudogene   | 0             |
| 3637 | chr6 | 89435365  | - | chrX | 119277793 | - | N | N | N | Y | Y | transl_inter | na | NA | intronic;intrn | RNGTT                | - | protein_cod  | 0            | ncRNA_exo     | RP4-755D9.1           | + | antisense    | 0             |
| 3638 | chr6 | 148991012 | - | chrX | 69737065  | - | Y | N | Y | N | N | transl_inter | na | NA | intergenic     | RP11-461H3.2,UST     | + | pseudogene   | 21279;77452  | intergenic    | DLG3,TEX11            | + | protein_cod  | 11728;11725   |
| 3639 | chr6 | 160656534 | - | chrX | 108796416 | - | N | Y | Y | N | Y | transl_inter | na | NA | intronic       | SLC22A2              | - | protein_cod  | 0            | intergenic    | NXT2,RP1-136J15.5     | + | protein_cod  | 8497;15291    |
| 3640 | chr6 | 170664467 | - | chrX | 54392713  | - | N | N | Y | N | N | transl_inter | na | NA | intronic       | FAM120B              | - | protein_cod  | 0            | intergenic    | WNK3,TSR2             | + | protein_cod  | 7638;74121    |
| 3641 | chr6 | 63720560  | - | chrX | 102685356 | + | Y | N | N | N | N | transl_inter | na | NA | intergenic     | AL590558.1,RP11-184  | + | miRNA,pseu   | 27485;182417 | intergenic    | NGFRAP1,LL0XNC01-2f   | + | protein_cod  | 52351;67095   |
| 3642 | chr6 | 89435365  | + | chrX | 119277793 | + | N | N | N | Y | N | transl_inter | na | NA | intronic;intrn | RNGTT                | - | protein_cod  | 0            | ncRNA_exo     | RP4-755D9.1           | + | antisense    | 0             |
| 3643 | chr6 | 89435383  | + | chrX | 119277935 | + | N | N | N | Y | N | transl_inter | na | NA | intronic       | RNGTT                | - | protein_cod  | 0            | ncRNA_intrn   | NKAPP1,RP4-755D9.1    | + | pseudogene   | 0             |
| 3644 | chr6 | 170911097 | + | chrY | 23901402  | - | N | Y | N | Y | Y | transl_inter | na | NA | intergenic     | PDCD2,OR4F7P         | + | protein_cod  | 17317;37597  | intergenic    | CDY11P,AC007322.1     | + | pseudogene   | 41296;116076  |
| 3645 | chr6 | 76821355  | + | chrY | 9951878   | + | Y | Y | Y | Y | Y | transl_inter | na | NA | intergenic     | RNU6-248P,RNU6-261   | + | snRNA,snR    | 18698;335350 | intergenic;ir | RNAS5P59,AC006987.1   | + | rRNA,pseu    | 21276;55519   |
| 3646 | chr7 | 2889934   | - | chr8 | 143267234 | - | N | N | N | N | Y | transl_inter | na | NA | intronic       | GNA12,CARD11         | - | protein_cod  | 5976;55841   | intergenic    | MIR4472.1,LINC00051   | + | miRNA,anti   | 9455;12483    |
| 3647 | chr7 | 2890358   | - | chr8 | 143267120 | - | N | N | Y | N | N | transl_inter | na | NA | intergenic     | GNA12,CARD11         | - | protein_cod  | 6400;55417   | intergenic    | MIR4472.1,LINC00051   | + | miRNA,anti   | 9341;12597    |
| 3648 | chr7 | 41511052  | - | chr8 | 38902944  | - | N | N | N | Y | N | transl_inter | na | NA | intronic       | DGKB                 | - | protein_cod  | 0            | intronic      | ADAM9                 | + | protein_cod  | 0             |
| 3649 | chr7 | 63818216  | - | chr8 | 47706457  | - | Y | N | N | Y | N | transl_inter | na | NA | intergenic     | TRIM60P18,YWHAEP     | + | pseudogene   | 1639;75992   | intergenic    | TRIM60P15,LINC00293   | + | pseudogene   | 1771;27402    |
| 3650 | chr7 | 16830671  | - | chr8 | 134769343 | + | Y | N | N | N | N | transl_inter | na | NA | downstream     | AGR2                 | - | protein_cod  | 0            | downstream    | CTD-230H9.2           | + | pseudogene   | 0             |
| 3651 | chr7 | 100938136 | - | chr8 | 114583754 | + | Y | N | Y | Y | Y | transl_inter | na | NA | intergenic     | AZGP1P2,RP11-132A'   | + | pseudogene   | 5084;4758    | intergenic    | CSMD3,RP11-67H2.1     | + | protein_cod  | 134426;28785  |
| 3652 | chr7 | 100939180 | - | chr8 | 37502878  | + | Y | N | N | N | Y | transl_inter | na | NA | intergenic;in  | AZGP1P2,RP11-132A'   | + | pseudogene   | 6128;3714    | ncRNA_intrn   | RP11-346L1.2          | + | antisense    | 0             |
| 3653 | chr7 | 52478344  | + | chr8 | 54528719  | - | N | N | N | Y | N | transl_inter | na | NA | intergenic     | snoU13,RP11-398K14   | + | snoRNA,ps    | 86759;481186 | intergenic    | RP11-400K9.2,RP11-463 | + | pseudogene   | 75859;96538   |
| 3654 | chr7 | 63239408  | + | chr8 | 128024315 | - | N | N | N | N | Y | transl_inter | na | NA | intergenic     | CICP24,CTD-2526L21   | + | pseudogene   | 7983;10879   | ncRNA_intrn   | PCAT1                 | + | lincRNA      | 0             |
| 3655 | chr7 | 100939180 | + | chr8 | 37502878  | - | N | N | N | Y | N | transl_inter | na | NA | intergenic;in  | AZGP1P2,RP11-132A'   | + | pseudogene   | 6128;3714    | ncRNA_intrn   | RP11-346L1.2          | + | antisense    | 0             |
| 3656 | chr7 | 63818177  | + | chr8 | 47706706  | + | N | N | N | N | Y | transl_inter | na | NA | intergenic     | TRIM60P18,YWHAEP     | + | pseudogene   | 1600;76031   | intergenic    | TRIM60P15,LINC00293   | + | pseudogene   | 2020;27153    |
| 3657 | chr7 | 63818200  | + | chr8 | 47706439  | + | Y | N | N | N | N | transl_inter | na | NA | intergenic     | TRIM60P18,YWHAEP     | + | pseudogene   | 1623;76008   | intergenic    | TRIM60P15,LINC00293   | + | pseudogene   | 1753;27420    |
| 3658 | chr7 | 68083944  | - | chr9 | 68418844  | - | Y | N | Y | Y | N | transl_inter | na | NA | intergenic     | RLP35P5,KCTD7        | + | protein_cod  | 11850;9924   | intergenic;ir | MIR4477A,RP11-764K9.9 | + | miRNA,pseu   | 3456;9017     |
| 3659 | chr7 | 142192393 | - | chr9 | 130185384 | - | N | Y | Y | N | N | transl_inter | na | NA | intergenic     | TRBV12-2,TRBV11-2    | + | TR_V_pseu    | 1313;5177    | intergenic    | SLC2A8,ZNF79          | + | protein_cod  | 15207;1277    |
| 3660 | chr7 | 124616084 | - | chr9 | 21127565  | + | N | N | N | N | Y | transl_inter | na | NA | ncRNA_intrn    | POT1-AS1             | - | antisense    | 0            | intergenic    | IFNWPA,IFNW1          | + | pseudogene   | 20730;13066   |
| 3661 | chr7 | 48030236  | + | chr9 | 68418844  | - | N | Y | N | Y | N | transl_inter | na | NA | intronic       | SUN3                 | - | protein_cod  | 0            | intergenic;ir | MIR4477A,RP11-764K9.9 | + | miRNA,pseu   | 3456;9017     |
| 3662 | chr7 | 62471645  | + | chr9 | 19043007  | - | N | Y | Y | N | Y | transl_inter | na | NA | downstream     | RNU6-417P            | - | snRNA        | 0            | intergenic    | FAM154A,RRAGA         | + | protein_cod  | 9756;6365     |
| 3663 | chr7 | 65060304  | + | chr9 | 69810212  | + | Y | N | Y | Y | Y | transl_inter | na | NA | intergenic     | RP11-667F9.1,RP13-1  | + | pseudogene   | 40647;21686  | intergenic    | IGKV10R-2,AL359955.1  | + | IG_V_pseu    | 32259;11548   |
| 3664 | chr7 | 65060337  | + | chr9 | 69810181  | + | N | N | N | Y | N | transl_inter | na | NA | intergenic     | RP11-667F9.1,RP13-1  | + | pseudogene   | 40680;21653  | intergenic    | IGKV10R-2,AL359955.1  | + | IG_V_pseu    | 32228;11579   |
| 3665 | chr7 | 142468073 | + | chr9 | 33795555  | + | N | N | N | Y | N | transl_inter | na | NA | upstream       | PRSS3P1              | - | pseudogene   | 0            | ncRNA_intrn   | RP11-133O22.6         | - | antisense    | 0             |
| 3666 | chr7 | 12368379  | - | chrX | 40774305  | - | Y | N | N | N | N | transl_inter | na | NA | intergenic     | AC091729.9,UNCX      | + | antisense,pi | 33476;34164  | intergenic    | RP11-7                |   |              |               |

|      |      |          |   |      |          |   |   |   |   |   |   |   |              |    |    |               |                     |     |             |               |             |                      |     |            |               |
|------|------|----------|---|------|----------|---|---|---|---|---|---|---|--------------|----|----|---------------|---------------------|-----|-------------|---------------|-------------|----------------------|-----|------------|---------------|
| 3691 | chr9 | 68393484 | - | chrY | 9945980  | + | N | N | N | Y | N | N | transl_inter | na | NA | intergenic    | PTGER4P3,RP11-764I  | -,- | pseudogene  | 21607;4394    | intergenic  | RNA5SP519,AC006987.I | -,- | rRNA,pseuc | 15378;61417   |
| 3692 | chr9 | 68404526 | - | chrY | 9934928  | + | N | N | N | N | Y | N | transl_inter | na | NA | ncRNA_intrn   | RP11-764K9.1        | -   | lincRNA     | 0             | intergenic  | RNA5SP519,AC006987.I | -,- | rRNA,pseuc | 4326;72469    |
| 3693 | chr9 | 68404580 | - | chrY | 9934900  | + | N | N | Y | N | N | N | transl_inter | na | NA | ncRNA_intrn   | RP11-764K9.1        | -   | lincRNA     | 0             | intergenic  | RNA5SP519,AC006987.I | -,- | rRNA,pseuc | 4298;72497    |
| 3694 | chr9 | 69000623 | - | chrY | 9957176  | + | N | N | Y | N | N | N | transl_inter | na | NA | intergenic    | AL353763.2,AL353763 | -,- | miRNA,miR   | 3139;1376     | intergenic  | RNA5SP519,AC006987.I | -,- | rRNA,pseuc | 26574;50221   |
| 3695 | chr9 | 68396459 | + | chrY | 9943015  | - | N | Y | N | N | N | N | transl_inter | na | NA | intergenic    | PTGER4P3,RP11-764I  | -,- | pseudogene  | 24582;1419    | intergenic  | RNA5SP519,AC006987.I | -,- | rRNA,pseuc | 12413;64382   |
| 3696 | chr9 | 66457697 | + | chrY | 9930001  | + | Y | N | N | N | N | N | transl_inter | na | NA | ncRNA_intrn   | RP11-262H14.1       | +   | lincRNA     | 0             | downstream  | RNA5SP519            | -   | rRNA       | 0             |
| 3697 | chr9 | 66462540 | + | chrY | 9935037  | + | N | N | N | Y | N | N | transl_inter | na | NA | ncRNA_intrn   | RP11-262H14.1       | +   | lincRNA     | 0             | intergenic  | RNA5SP519,AC006987.I | -,- | rRNA,pseuc | 4435;72360    |
| 3698 | chr9 | 68418788 | + | chrY | 9961756  | + | N | N | N | N | N | Y | transl_inter | na | NA | intergenic    | MIR4477A,RP11-764K  | +,  | miRNA,psei  | 3400;9073     | intergenic  | RNA5SP519,AC006987.I | -,- | rRNA,pseuc | 31154;45641   |
| 3699 | chr9 | 68418844 | + | chrY | 9962011  | + | Y | N | N | N | N | N | transl_inter | na | NA | intergenic    | MIR4477A,RP11-764K  | +,  | miRNA,psei  | 3456;9017     | intergenic  | RNA5SP519,AC006987.I | -,- | rRNA,pseuc | 31409;45386   |
| 3700 | chrX | 88461979 | - | chrY | 6402258  | - | N | N | N | N | Y | N | transl_inter | na | NA | intergenic    | RP13-324D24.1,SRIP2 | -,- | pseudogene  | 224625;160455 | intergenic  | TSPY17P,SRIP3        | +,  | pseudogene | 13288;184745  |
| 3701 | chrX | 88462160 | - | chrY | 6402635  | - | N | Y | N | N | N | N | transl_inter | na | NA | intergenic    | RP13-324D24.1,SRIP2 | -,- | pseudogene  | 224806;160274 | intergenic  | TSPY17P,SRIP3        | +,  | pseudogene | 13665;184368  |
| 3702 | chrX | 2832367  | - | chrY | 14491286 | + | Y | Y | N | N | N | N | transl_inter | na | NA | intronic      | ARSD                | -   | protein_cod | 0             | ncRNA_intrn | GYG2P1,ARSDP1        | +,  | pseudogene | 0             |
| 3703 | chrX | 2832405  | - | chrY | 14491286 | + | N | N | N | N | Y | N | transl_inter | na | NA | intronic      | ARSD                | -   | protein_cod | 0             | ncRNA_intrn | GYG2P1,ARSDP1        | +,  | pseudogene | 0             |
| 3704 | chrX | 3351404  | - | chrY | 7431237  | + | Y | N | N | N | N | N | transl_inter | na | NA | intergenic    | ASS1P4,SNORA48      | +,  | pseudogene  | 64981;98754   | intergenic  | RNU6-521P,RBMY2HP    | -,- | snRNA,psei | 140038;108547 |
| 3705 | chrX | 42510334 | - | chrY | 9950347  | + | N | N | Y | N | N | N | transl_inter | na | NA | ncRNA_intrn   | RP1-154K9.2         | +   | lincRNA     | 0             | intergenic  | RNA5SP519,AC006987.I | -,- | rRNA,pseuc | 19745;57050   |
| 3706 | chrX | 3196115  | + | chrY | 14172715 | - | Y | Y | Y | N | N | Y | transl_inter | na | NA | intronic      | CXorf28             | +   | protein_cod | 0             | intergenic  | MXRA5P1,RPS24P1      | +,  | pseudogene | 64623;192742  |
| 3707 | chrX | 4965678  | + | chrY | 18680348 | - | N | Y | Y | Y | N | N | transl_inter | na | NA | intergenic    | AC074035.1,MTND6P   | -,- | miRNA,psei  | 328723;121281 | intergenic  | RNU6-184P,SURF6P1    | +,  | snRNA,psei | 232079;624358 |
| 3708 | chrX | 88462263 | + | chrY | 6401459  | + | N | N | Y | N | N | N | transl_inter | na | NA | intergenic;in | RP13-324D24.1,SRIP2 | -,- | pseudogene  | 224909;160171 | intergenic  | TSPY17P,SRIP3        | +,  | pseudogene | 12489;185544  |
| 3709 | chrX | 88462263 | + | chrY | 6401518  | + | N | Y | N | N | N | N | transl_inter | na | NA | intergenic;in | RP13-324D24.1,SRIP2 | -,- | pseudogene  | 224909;160171 | intergenic  | TSPY17P,SRIP3        | +,  | pseudogene | 12548;185485  |
| 3710 | chrX | 88462480 | + | chrY | 6400797  | + | N | Y | N | N | N | N | transl_inter | na | NA | intergenic    | RP13-324D24.1,SRIP2 | -,- | pseudogene  | 225126;159954 | intergenic  | TSPY17P,SRIP3        | +,  | pseudogene | 11827;186206  |
| 3711 | chrX | 88462502 | + | chrY | 6402064  | + | N | N | N | N | Y | N | transl_inter | na | NA | intergenic    | RP13-324D24.1,SRIP2 | -,- | pseudogene  | 225148;159932 | intergenic  | TSPY17P,SRIP3        | +,  | pseudogene | 13094;184939  |
